# Supplementary material
Source: PubMed Central journal article supplement (PMC10592449)
Supplement: NIHMS1914142-supplement-1.pdf [file NIHMS1914142-supplement-1.pdf]

**NURS: Balas Discover ICU R01** PID 2142

Codebook ▾

**Data Dictionary Codebook**

01/21/2022 3:05pm

[^ Collapse all instruments](#)

| #                                                                                                                                                         | Variable / Field Name | Field Label<br><i>Field Note</i>                                                                                                                                                                                                                                                                                                                                                                                                                                                                                                                                                                                                                                                                                                                                                                                                                                                                                                                                                                                                                                                                                                                                                                                                                                                                                                                                                                                                                                                                                                                                                                                                                                                                                                                                                                                                                                                                                                                                                                                                                                                                                                                                                                                                                                                                                                                                                                                                                                                                                                                                                                                                                                                                                                                                                                                                                                                                                                                                                                                                                                                                                                                                                                                                                                                                                                                                                                                                                                                                                                                                                                                                                                                                                                                                                                                                                                               | Field Attributes (Field Type, Validation, Choices, Calculations, etc.) |
|-----------------------------------------------------------------------------------------------------------------------------------------------------------|-----------------------|--------------------------------------------------------------------------------------------------------------------------------------------------------------------------------------------------------------------------------------------------------------------------------------------------------------------------------------------------------------------------------------------------------------------------------------------------------------------------------------------------------------------------------------------------------------------------------------------------------------------------------------------------------------------------------------------------------------------------------------------------------------------------------------------------------------------------------------------------------------------------------------------------------------------------------------------------------------------------------------------------------------------------------------------------------------------------------------------------------------------------------------------------------------------------------------------------------------------------------------------------------------------------------------------------------------------------------------------------------------------------------------------------------------------------------------------------------------------------------------------------------------------------------------------------------------------------------------------------------------------------------------------------------------------------------------------------------------------------------------------------------------------------------------------------------------------------------------------------------------------------------------------------------------------------------------------------------------------------------------------------------------------------------------------------------------------------------------------------------------------------------------------------------------------------------------------------------------------------------------------------------------------------------------------------------------------------------------------------------------------------------------------------------------------------------------------------------------------------------------------------------------------------------------------------------------------------------------------------------------------------------------------------------------------------------------------------------------------------------------------------------------------------------------------------------------------------------------------------------------------------------------------------------------------------------------------------------------------------------------------------------------------------------------------------------------------------------------------------------------------------------------------------------------------------------------------------------------------------------------------------------------------------------------------------------------------------------------------------------------------------------------------------------------------------------------------------------------------------------------------------------------------------------------------------------------------------------------------------------------------------------------------------------------------------------------------------------------------------------------------------------------------------------------------------------------------------------------------------------------------------------|------------------------------------------------------------------------|
| Instrument: <b>Consent</b> (consent) <span style="color: green;">🔗 Enabled as survey</span> <span style="float: right;"><a href="#">^ Collapse</a></span> |                       |                                                                                                                                                                                                                                                                                                                                                                                                                                                                                                                                                                                                                                                                                                                                                                                                                                                                                                                                                                                                                                                                                                                                                                                                                                                                                                                                                                                                                                                                                                                                                                                                                                                                                                                                                                                                                                                                                                                                                                                                                                                                                                                                                                                                                                                                                                                                                                                                                                                                                                                                                                                                                                                                                                                                                                                                                                                                                                                                                                                                                                                                                                                                                                                                                                                                                                                                                                                                                                                                                                                                                                                                                                                                                                                                                                                                                                                                                |                                                                        |
| 1                                                                                                                                                         | record_id             | Record ID                                                                                                                                                                                                                                                                                                                                                                                                                                                                                                                                                                                                                                                                                                                                                                                                                                                                                                                                                                                                                                                                                                                                                                                                                                                                                                                                                                                                                                                                                                                                                                                                                                                                                                                                                                                                                                                                                                                                                                                                                                                                                                                                                                                                                                                                                                                                                                                                                                                                                                                                                                                                                                                                                                                                                                                                                                                                                                                                                                                                                                                                                                                                                                                                                                                                                                                                                                                                                                                                                                                                                                                                                                                                                                                                                                                                                                                                      | text                                                                   |
| 2                                                                                                                                                         | consent_text          | The Ohio State University Consent to Participate in Research Online Implementation Survey Study Title: Determinants of Implementation Success Coordinating Ventilator, Early Ambulation and Rehabilitation Efforts in the ICU (DISCOVER-ICU) Researcher: Michele Christina Balas PhD, RN, CCRN-K, FCCM, FAAN Sponsor: National Heart, Lung, and Blood Institute (NIH) This is a consent form for research participation. It contains important information about this study and what to expect if you decide to participate. Your participation is voluntary. Please consider the information carefully. Feel free to ask questions before making your decision whether or not to participate. Purpose: The purpose of the DISCOVER-ICU study is to develop multilevel implementation strategies to enhance sustainable uptake of the ABCDEF bundle into routine clinical practice. This survey provides the name and definition of variable actions/strategies used to increase adoption of evidence-based intensive care unit (ICU) practices. We are interested in learning what actions/strategies your ICU team used to facilitate adoption of the ABCDEF bundle during the course of time you spent participating in the Society of Critical Care Medicine's ICU Liberation Collaborative that began on August 1st, 2015 and concluded on April 30th, 2017. We are also interested in discovering whether your team found these actions/strategies helpful, acceptable, feasible, and costly. Procedures/Tasks: We ask that you engage colleagues from various disciplines (e.g., nursing, medicine, pharmacy, respiratory/physical/occupational therapy) who worked in your unit during the ICU Liberation Collaborative in completion of the survey. There is no set approach in garnering your team's input. We encourage you to do what is best for you and your ICU team. You may choose to: 1) Conduct a meeting specifically focused on completing the online survey. During this team meeting, the online survey could be accessed, questions discussed, and responses entered simultaneously. We recommend this approach as it is likely to be the most comprehensive and least time consuming. 2) Print a hardcopy of the survey to discuss and complete during a regularly scheduled or small group team meeting. Once the survey is complete, one team member would then enter the site data into the online survey. 3) Print hardcopies of the survey and ask each team member to complete it individually. Once responses are received, one team member would then resolve any conflicting answers and enter the site data into the online survey. 4) Distribute a word or PDF version of the survey via email communication to team members. Completed surveys could then be given to one team member who would then resolve any conflicting answers and enter the site data into the online survey. There may be some disagreements among professionals on various aspects of the survey. Because only one survey may be submitted per site, we ask you complete it as well as you can and as closely aligned with the team's consensus as possible. If necessary, we suggest the team member who played the most active role in ABCDEF bundle implementation efforts resolves any disagreements. Duration: Because we are requesting the engagement of multiple stakeholders, we anticipate that the time necessary to complete the survey may vary by site. We estimate it will take approximately 20 minutes for an individual to complete the survey and approximately 40-50 minutes to complete the survey if discussed during a team meeting. You may leave the study at any time. If you decide to stop participating in the study, there will be no penalty to you, and you will not lose any benefits to which you are otherwise entitled. Your | descriptive                                                            |

|   |                  |                                                                                                                                                                                                                                                                                                                                                                                                                                                                                                                                                                                                                                                                                                                                                                                                                                                                                                                                                                                                                                                                                                                                                                                                                                                                                                                                                                                                                                                                                                                                                                                                                                                                                                                                                                                                                                                                                                                                                                                                                                                                                                                                                                                                                                                                                                                                                                                                                                                                                                                                                                                                                                                                                                                                                                                                                                                                                                                                                                                                                                                                                                                                                                                                                                                                                                                                                                                                                                                                                                                                                                                                                                                                                                                                                                                                                                                                                                                                                                                                        |                                                                                                                                                                         |   |            |   |            |   |          |
|---|------------------|--------------------------------------------------------------------------------------------------------------------------------------------------------------------------------------------------------------------------------------------------------------------------------------------------------------------------------------------------------------------------------------------------------------------------------------------------------------------------------------------------------------------------------------------------------------------------------------------------------------------------------------------------------------------------------------------------------------------------------------------------------------------------------------------------------------------------------------------------------------------------------------------------------------------------------------------------------------------------------------------------------------------------------------------------------------------------------------------------------------------------------------------------------------------------------------------------------------------------------------------------------------------------------------------------------------------------------------------------------------------------------------------------------------------------------------------------------------------------------------------------------------------------------------------------------------------------------------------------------------------------------------------------------------------------------------------------------------------------------------------------------------------------------------------------------------------------------------------------------------------------------------------------------------------------------------------------------------------------------------------------------------------------------------------------------------------------------------------------------------------------------------------------------------------------------------------------------------------------------------------------------------------------------------------------------------------------------------------------------------------------------------------------------------------------------------------------------------------------------------------------------------------------------------------------------------------------------------------------------------------------------------------------------------------------------------------------------------------------------------------------------------------------------------------------------------------------------------------------------------------------------------------------------------------------------------------------------------------------------------------------------------------------------------------------------------------------------------------------------------------------------------------------------------------------------------------------------------------------------------------------------------------------------------------------------------------------------------------------------------------------------------------------------------------------------------------------------------------------------------------------------------------------------------------------------------------------------------------------------------------------------------------------------------------------------------------------------------------------------------------------------------------------------------------------------------------------------------------------------------------------------------------------------------------------------------------------------------------------------------------------------|-------------------------------------------------------------------------------------------------------------------------------------------------------------------------|---|------------|---|------------|---|----------|
|   |                  | <p>decision will not affect your future relationship with The Ohio State University. Risks and Benefits: There are no known physical or psychologic risks to being in the study. You may skip any survey questions you do not wish to answer. You will not receive any benefit from study participation, but your opinions and experiences may contribute to a better understanding of what strategies are most beneficial in terms of increasing ABCDEF bundle adoption. Confidentiality: We will work to make sure that no one sees your online responses without approval. But, because we are using the Internet, there is a chance that someone could access your online responses without permission. In some cases, this information could be used to identify you. Your data will be protected with a code to reduce the risk that other people can view the responses. Also, there may be circumstances where this information must be released. For example, personal information regarding your participation in this study may be disclosed if required by state law. Also, your records may be reviewed by the following groups (as applicable to the research): · Office for Human Research Protections or other federal, state, or international regulatory agencies; · The Ohio State University Institutional Review Board or Office of Responsible Research Practices; · The sponsor, if any, or agency (including the Food and Drug Administration for FDA-regulated research) supporting the study Future Research: Your de-identified information may be used or shared with other researchers without your additional informed consent. Incentives: Each team member who participates in completing the survey, maximum of four team members per site, will receive a \$25 Amazon gift card. In addition, the person responsible for entering the site data into REDCap will receive an additional \$25 Amazon gift card. Reimbursement will occur once all of the survey data is entered into REDCap. By law, payments to participants are considered taxable income. Participant Rights: You may refuse to participate in this study without penalty or loss of benefits to which you are otherwise entitled. If you are a student or employee at Ohio State, your decision will not affect your grades or employment status. If you choose to participate in the study, you may discontinue participation at any time without penalty or loss of benefits. By agreeing to participate, you do not give up any personal legal rights you may have as a participant in this study. An Institutional Review Board responsible for human subjects research at The Ohio State University reviewed this research project and found it to be acceptable, according to applicable state and federal regulations and University policies designed to protect the rights and welfare of participants in research. Contacts and Questions: For questions, concerns, or complaints about the study, or you feel you have been harmed as a result of study participation, you may contact Dr. Michele Balas via email at <a href="mailto:balas.17@osu.edu">balas.17@osu.edu</a> or by telephone at 614-688-2050. For questions about your rights as a participant in this study or to discuss other study-related concerns or complaints with someone who is not part of the research team, you may contact the Office of Responsible Research Practices at 1-800-678-6251 or <a href="mailto:hsconcerns@osu.edu">hsconcerns@osu.edu</a>. Providing consent I have read (or someone has read to me) this page and I am aware that I am being asked to participate in a research study. I have had the opportunity to ask questions and have had them answered to my satisfaction. I voluntarily agree to participate in this study. I am not giving up any legal rights by agreeing to participate. To print or save a copy of this page, select the print button on your web browser.</p> |                                                                                                                                                                         |   |            |   |            |   |          |
| 3 | consent_yes_no   | Please select Yes and click "Submit" below to proceed and participate in this study. If you do not wish to participate, please close out your browser window or select No.                                                                                                                                                                                                                                                                                                                                                                                                                                                                                                                                                                                                                                                                                                                                                                                                                                                                                                                                                                                                                                                                                                                                                                                                                                                                                                                                                                                                                                                                                                                                                                                                                                                                                                                                                                                                                                                                                                                                                                                                                                                                                                                                                                                                                                                                                                                                                                                                                                                                                                                                                                                                                                                                                                                                                                                                                                                                                                                                                                                                                                                                                                                                                                                                                                                                                                                                                                                                                                                                                                                                                                                                                                                                                                                                                                                                                             | <p>yesno, Required</p> <table border="1"> <tr> <td>1</td> <td>Yes</td> </tr> <tr> <td>0</td> <td>No</td> </tr> </table> <p>Custom alignment: RH</p>                     | 1 | Yes        | 0 | No         |   |          |
| 1 | Yes              |                                                                                                                                                                                                                                                                                                                                                                                                                                                                                                                                                                                                                                                                                                                                                                                                                                                                                                                                                                                                                                                                                                                                                                                                                                                                                                                                                                                                                                                                                                                                                                                                                                                                                                                                                                                                                                                                                                                                                                                                                                                                                                                                                                                                                                                                                                                                                                                                                                                                                                                                                                                                                                                                                                                                                                                                                                                                                                                                                                                                                                                                                                                                                                                                                                                                                                                                                                                                                                                                                                                                                                                                                                                                                                                                                                                                                                                                                                                                                                                                        |                                                                                                                                                                         |   |            |   |            |   |          |
| 0 | No               |                                                                                                                                                                                                                                                                                                                                                                                                                                                                                                                                                                                                                                                                                                                                                                                                                                                                                                                                                                                                                                                                                                                                                                                                                                                                                                                                                                                                                                                                                                                                                                                                                                                                                                                                                                                                                                                                                                                                                                                                                                                                                                                                                                                                                                                                                                                                                                                                                                                                                                                                                                                                                                                                                                                                                                                                                                                                                                                                                                                                                                                                                                                                                                                                                                                                                                                                                                                                                                                                                                                                                                                                                                                                                                                                                                                                                                                                                                                                                                                                        |                                                                                                                                                                         |   |            |   |            |   |          |
| 4 | consent_complete | Section Header: <i>Form Status</i><br>Complete?                                                                                                                                                                                                                                                                                                                                                                                                                                                                                                                                                                                                                                                                                                                                                                                                                                                                                                                                                                                                                                                                                                                                                                                                                                                                                                                                                                                                                                                                                                                                                                                                                                                                                                                                                                                                                                                                                                                                                                                                                                                                                                                                                                                                                                                                                                                                                                                                                                                                                                                                                                                                                                                                                                                                                                                                                                                                                                                                                                                                                                                                                                                                                                                                                                                                                                                                                                                                                                                                                                                                                                                                                                                                                                                                                                                                                                                                                                                                                        | <p>dropdown</p> <table border="1"> <tr> <td>0</td> <td>Incomplete</td> </tr> <tr> <td>1</td> <td>Unverified</td> </tr> <tr> <td>2</td> <td>Complete</td> </tr> </table> | 0 | Incomplete | 1 | Unverified | 2 | Complete |
| 0 | Incomplete       |                                                                                                                                                                                                                                                                                                                                                                                                                                                                                                                                                                                                                                                                                                                                                                                                                                                                                                                                                                                                                                                                                                                                                                                                                                                                                                                                                                                                                                                                                                                                                                                                                                                                                                                                                                                                                                                                                                                                                                                                                                                                                                                                                                                                                                                                                                                                                                                                                                                                                                                                                                                                                                                                                                                                                                                                                                                                                                                                                                                                                                                                                                                                                                                                                                                                                                                                                                                                                                                                                                                                                                                                                                                                                                                                                                                                                                                                                                                                                                                                        |                                                                                                                                                                         |   |            |   |            |   |          |
| 1 | Unverified       |                                                                                                                                                                                                                                                                                                                                                                                                                                                                                                                                                                                                                                                                                                                                                                                                                                                                                                                                                                                                                                                                                                                                                                                                                                                                                                                                                                                                                                                                                                                                                                                                                                                                                                                                                                                                                                                                                                                                                                                                                                                                                                                                                                                                                                                                                                                                                                                                                                                                                                                                                                                                                                                                                                                                                                                                                                                                                                                                                                                                                                                                                                                                                                                                                                                                                                                                                                                                                                                                                                                                                                                                                                                                                                                                                                                                                                                                                                                                                                                                        |                                                                                                                                                                         |   |            |   |            |   |          |
| 2 | Complete         |                                                                                                                                                                                                                                                                                                                                                                                                                                                                                                                                                                                                                                                                                                                                                                                                                                                                                                                                                                                                                                                                                                                                                                                                                                                                                                                                                                                                                                                                                                                                                                                                                                                                                                                                                                                                                                                                                                                                                                                                                                                                                                                                                                                                                                                                                                                                                                                                                                                                                                                                                                                                                                                                                                                                                                                                                                                                                                                                                                                                                                                                                                                                                                                                                                                                                                                                                                                                                                                                                                                                                                                                                                                                                                                                                                                                                                                                                                                                                                                                        |                                                                                                                                                                         |   |            |   |            |   |          |

Instrument: **Discovery ICU Survey** ([discovery\\_icu\\_survey](#))  Enabled as survey

[^ Collapse](#)

|   |                           |                                                                                                                                                                                                                                                                                                                                                                                                                                                                                                                                                                                                                                                                                                                                                                                                                                                                                                                                                                                                                                                                                                                                                                                                                                                                                                                                                                                                                                                                                                                                                                                                                                                                                                                                                                                                                                                                                                                                                                                                                                                                                                                                                                                                                                                                                                                                                                                                                                                                                                                                                                                                                                                                                                                                                                                                                                                                                                                                                                                                                                                                                                                                                                                                                                                                                                                                                                                                                                                                                                                                                                                                                                                                                                                                                                                                                                                                                                                                                                                                                                                                                                                                                                                                                                                                                                                                                                                                                                                                                                          |                                                                                                                                                                                     |   |     |   |    |
|---|---------------------------|----------------------------------------------------------------------------------------------------------------------------------------------------------------------------------------------------------------------------------------------------------------------------------------------------------------------------------------------------------------------------------------------------------------------------------------------------------------------------------------------------------------------------------------------------------------------------------------------------------------------------------------------------------------------------------------------------------------------------------------------------------------------------------------------------------------------------------------------------------------------------------------------------------------------------------------------------------------------------------------------------------------------------------------------------------------------------------------------------------------------------------------------------------------------------------------------------------------------------------------------------------------------------------------------------------------------------------------------------------------------------------------------------------------------------------------------------------------------------------------------------------------------------------------------------------------------------------------------------------------------------------------------------------------------------------------------------------------------------------------------------------------------------------------------------------------------------------------------------------------------------------------------------------------------------------------------------------------------------------------------------------------------------------------------------------------------------------------------------------------------------------------------------------------------------------------------------------------------------------------------------------------------------------------------------------------------------------------------------------------------------------------------------------------------------------------------------------------------------------------------------------------------------------------------------------------------------------------------------------------------------------------------------------------------------------------------------------------------------------------------------------------------------------------------------------------------------------------------------------------------------------------------------------------------------------------------------------------------------------------------------------------------------------------------------------------------------------------------------------------------------------------------------------------------------------------------------------------------------------------------------------------------------------------------------------------------------------------------------------------------------------------------------------------------------------------------------------------------------------------------------------------------------------------------------------------------------------------------------------------------------------------------------------------------------------------------------------------------------------------------------------------------------------------------------------------------------------------------------------------------------------------------------------------------------------------------------------------------------------------------------------------------------------------------------------------------------------------------------------------------------------------------------------------------------------------------------------------------------------------------------------------------------------------------------------------------------------------------------------------------------------------------------------------------------------------------------------------------------------------------------------|-------------------------------------------------------------------------------------------------------------------------------------------------------------------------------------|---|-----|---|----|
| 5 | instructions              | <p>Instructions Purpose: This survey provides the name and definition of variable actions/strategies used to increase adoption of evidence-based ICU practices. We are specifically interested in learning what actions/strategies your ICU team used to facilitate adoption of the ABCDEF bundle during the Society of Critical Care Medicine's ICU Liberation Collaborative that began on August 1st, 2015 and concluded on April 30th, 2017. We are also interested in discovering whether your team found these actions/strategies helpful, acceptable, feasible, and costly. Who: Each ICU Liberation Collaborative site is allowed to submit one survey. We ask that you engage colleagues from various disciplines (e.g., nursing, medicine, pharmacy, respiratory/physical/occupational therapy) who worked in your unit during the ICU Liberation Collaborative in completion of this survey. Each team member who participates in completing the survey, maximum of four team members per site, will receive a \$25 Amazon gift card. In addition, the person responsible for submitting the online survey will receive an additional \$25 Amazon gift card. Reimbursement will occur once all of the online survey data is submitted. Time: Estimated at 20 minutes for individuals; approximately 40-50 minutes for team gathering and joint completion. Strategies: There is no set approach in garnering your team's input. We encourage you to do what is best for you and your ICU team. There may be some disagreements among professionals on various aspects of the survey. Because only one survey may be submitted per site, we ask you complete it as well as you can and as closely aligned with the team's consensus as possible. If necessary, we suggest the team member who played the most active role in ABCDEF bundle implementation efforts resolves any disagreements. Your team may choose to: 1) Conduct a meeting specifically focused on completing the online survey. During this team meeting, the online survey could be accessed, questions discussed, and responses entered simultaneously. We recommend this approach as it is likely to be the most comprehensive and least time consuming. 2) Print a hardcopy of the survey to discuss and complete during a regularly scheduled or small group team meeting. Once the survey is complete, one team member would then enter the site data into the online survey. 3) Print hardcopies of the survey and ask each team member to complete it individually. Once responses are received, one team member would then resolve any conflicting answers and enter the site data into the online survey. 4) Distribute a word or PDF version of the survey via email communication to team members. Completed surveys could then be given to one team member who would then resolve any conflicting answers and enter the site data into the online survey. Action: Reflect on the actions/strategies your team used during the course of the ICU Liberation Collaborative to increase your ICUs' adoption of the ABCDEF bundle. For each item presented, select either "yes or no" to indicate whether your team used the action to increase adoption of the ABCDEF bundle or its individual elements. If "no" is selected, proceed to next question. If "yes" is selected, you will be asked to rate how helpful, acceptable, feasible, and costly using the action/strategy was. In total, there are 73 actions/strategies that are divided among 9 sections. Please note: several of the actions/strategies may be unfamiliar to you and not all strategies are applicable to ABCDEF bundle implementation. There are no "correct answers" or minimum amount of actions/strategies that should be reported. We are simply interested in learning what actions/strategies your ICU team used. The next survey section (i.e., section 10) will give you the opportunity to describe any other actions/strategies that your team used to increase ABCDEF bundle adoption that were not presented previously. The final section of this survey will collect basic information regarding site characteristics and who assisted in completion of the survey. Should you have any comments or questions regarding the survey, please feel free to contact Lori Harmon (SCCM) at lharmon@sccm.org or Michele Balas (PI) at balas.17@osu.edu. Please click on "Next Page &gt;&gt;" below to continue to the survey.</p> | descriptive                                                                                                                                                                         |   |     |   |    |
| 6 | section_1_text            | <p>Section Header:<br/>SECTION 1: TRAIN AND EDUCATE STAKEHOLDERS (11 QUESTIONS)</p>                                                                                                                                                                                                                                                                                                                                                                                                                                                                                                                                                                                                                                                                                                                                                                                                                                                                                                                                                                                                                                                                                                                                                                                                                                                                                                                                                                                                                                                                                                                                                                                                                                                                                                                                                                                                                                                                                                                                                                                                                                                                                                                                                                                                                                                                                                                                                                                                                                                                                                                                                                                                                                                                                                                                                                                                                                                                                                                                                                                                                                                                                                                                                                                                                                                                                                                                                                                                                                                                                                                                                                                                                                                                                                                                                                                                                                                                                                                                                                                                                                                                                                                                                                                                                                                                                                                                                                                                                      | descriptive                                                                                                                                                                         |   |     |   |    |
| 7 | section_1_action_1_yes_no | <p>Action 1: Develop educational materials</p> <p>Q: Did your institution develop and format manuals, toolkits, and other supporting materials in ways that make it easier for stakeholders to learn about the ABCDEF bundle and for clinicians to learn how to deliver the bundle?</p> <p>If action not used, mark "No" and go to next reflection question</p>                                                                                                                                                                                                                                                                                                                                                                                                                                                                                                                                                                                                                                                                                                                                                                                                                                                                                                                                                                                                                                                                                                                                                                                                                                                                                                                                                                                                                                                                                                                                                                                                                                                                                                                                                                                                                                                                                                                                                                                                                                                                                                                                                                                                                                                                                                                                                                                                                                                                                                                                                                                                                                                                                                                                                                                                                                                                                                                                                                                                                                                                                                                                                                                                                                                                                                                                                                                                                                                                                                                                                                                                                                                                                                                                                                                                                                                                                                                                                                                                                                                                                                                                          | <p>yesno, Required</p> <table border="1" data-bbox="1040 1843 1114 1919"> <tr> <td>1</td> <td>Yes</td> </tr> <tr> <td>0</td> <td>No</td> </tr> </table> <p>Custom alignment: RH</p> | 1 | Yes | 0 | No |
| 1 | Yes                       |                                                                                                                                                                                                                                                                                                                                                                                                                                                                                                                                                                                                                                                                                                                                                                                                                                                                                                                                                                                                                                                                                                                                                                                                                                                                                                                                                                                                                                                                                                                                                                                                                                                                                                                                                                                                                                                                                                                                                                                                                                                                                                                                                                                                                                                                                                                                                                                                                                                                                                                                                                                                                                                                                                                                                                                                                                                                                                                                                                                                                                                                                                                                                                                                                                                                                                                                                                                                                                                                                                                                                                                                                                                                                                                                                                                                                                                                                                                                                                                                                                                                                                                                                                                                                                                                                                                                                                                                                                                                                                          |                                                                                                                                                                                     |   |     |   |    |
| 0 | No                        |                                                                                                                                                                                                                                                                                                                                                                                                                                                                                                                                                                                                                                                                                                                                                                                                                                                                                                                                                                                                                                                                                                                                                                                                                                                                                                                                                                                                                                                                                                                                                                                                                                                                                                                                                                                                                                                                                                                                                                                                                                                                                                                                                                                                                                                                                                                                                                                                                                                                                                                                                                                                                                                                                                                                                                                                                                                                                                                                                                                                                                                                                                                                                                                                                                                                                                                                                                                                                                                                                                                                                                                                                                                                                                                                                                                                                                                                                                                                                                                                                                                                                                                                                                                                                                                                                                                                                                                                                                                                                                          |                                                                                                                                                                                     |   |     |   |    |

|    |                                                                                                     |                                                                                                                                                                                                                                                                                              |                                                                                                                                                                                                                                                                                                                         |   |                           |   |                         |   |                           |   |                     |   |                          |
|----|-----------------------------------------------------------------------------------------------------|----------------------------------------------------------------------------------------------------------------------------------------------------------------------------------------------------------------------------------------------------------------------------------------------|-------------------------------------------------------------------------------------------------------------------------------------------------------------------------------------------------------------------------------------------------------------------------------------------------------------------------|---|---------------------------|---|-------------------------|---|---------------------------|---|---------------------|---|--------------------------|
| 8  | <p>section_1_action_1_text</p> <p>Show the field ONLY if:<br/>[section_1_action_1_yes_no] = '1'</p> | <p>When reflecting on your ICU's ABCDEF bundle implementation efforts:</p>                                                                                                                                                                                                                   | <p>descriptive</p>                                                                                                                                                                                                                                                                                                      |   |                           |   |                         |   |                           |   |                     |   |                          |
| 9  | <p>section_1_action_1_a</p> <p>Show the field ONLY if:<br/>[section_1_action_1_yes_no] = '1'</p>    | <p>A. How helpful was developing educational materials for increasing bundle adoption?</p>                                                                                                                                                                                                   | <p>radio, Required</p> <table border="1"> <tr><td>1</td><td>1 = Not at all helpful</td></tr> <tr><td>2</td><td>2 = Somewhat helpful</td></tr> <tr><td>3</td><td>3 = Moderately helpful</td></tr> <tr><td>4</td><td>4 = Very helpful</td></tr> <tr><td>5</td><td>5 = Extremely helpful</td></tr> </table>                | 1 | 1 = Not at all helpful    | 2 | 2 = Somewhat helpful    | 3 | 3 = Moderately helpful    | 4 | 4 = Very helpful    | 5 | 5 = Extremely helpful    |
| 1  | 1 = Not at all helpful                                                                              |                                                                                                                                                                                                                                                                                              |                                                                                                                                                                                                                                                                                                                         |   |                           |   |                         |   |                           |   |                     |   |                          |
| 2  | 2 = Somewhat helpful                                                                                |                                                                                                                                                                                                                                                                                              |                                                                                                                                                                                                                                                                                                                         |   |                           |   |                         |   |                           |   |                     |   |                          |
| 3  | 3 = Moderately helpful                                                                              |                                                                                                                                                                                                                                                                                              |                                                                                                                                                                                                                                                                                                                         |   |                           |   |                         |   |                           |   |                     |   |                          |
| 4  | 4 = Very helpful                                                                                    |                                                                                                                                                                                                                                                                                              |                                                                                                                                                                                                                                                                                                                         |   |                           |   |                         |   |                           |   |                     |   |                          |
| 5  | 5 = Extremely helpful                                                                               |                                                                                                                                                                                                                                                                                              |                                                                                                                                                                                                                                                                                                                         |   |                           |   |                         |   |                           |   |                     |   |                          |
| 10 | <p>section_1_action_1_b</p> <p>Show the field ONLY if:<br/>[section_1_action_1_yes_no] = '1'</p>    | <p>B. How acceptable was developing bundle-related educational materials among ICU team members?</p>                                                                                                                                                                                         | <p>radio, Required</p> <table border="1"> <tr><td>1</td><td>1 = Not at all acceptable</td></tr> <tr><td>2</td><td>2 = Somewhat acceptable</td></tr> <tr><td>3</td><td>3 = Moderately acceptable</td></tr> <tr><td>4</td><td>4 = Very acceptable</td></tr> <tr><td>5</td><td>5 = Extremely acceptable</td></tr> </table> | 1 | 1 = Not at all acceptable | 2 | 2 = Somewhat acceptable | 3 | 3 = Moderately acceptable | 4 | 4 = Very acceptable | 5 | 5 = Extremely acceptable |
| 1  | 1 = Not at all acceptable                                                                           |                                                                                                                                                                                                                                                                                              |                                                                                                                                                                                                                                                                                                                         |   |                           |   |                         |   |                           |   |                     |   |                          |
| 2  | 2 = Somewhat acceptable                                                                             |                                                                                                                                                                                                                                                                                              |                                                                                                                                                                                                                                                                                                                         |   |                           |   |                         |   |                           |   |                     |   |                          |
| 3  | 3 = Moderately acceptable                                                                           |                                                                                                                                                                                                                                                                                              |                                                                                                                                                                                                                                                                                                                         |   |                           |   |                         |   |                           |   |                     |   |                          |
| 4  | 4 = Very acceptable                                                                                 |                                                                                                                                                                                                                                                                                              |                                                                                                                                                                                                                                                                                                                         |   |                           |   |                         |   |                           |   |                     |   |                          |
| 5  | 5 = Extremely acceptable                                                                            |                                                                                                                                                                                                                                                                                              |                                                                                                                                                                                                                                                                                                                         |   |                           |   |                         |   |                           |   |                     |   |                          |
| 11 | <p>section_1_action_1_c</p> <p>Show the field ONLY if:<br/>[section_1_action_1_yes_no] = '1'</p>    | <p>C. How feasible was it develop bundle-related educational materials?</p>                                                                                                                                                                                                                  | <p>radio, Required</p> <table border="1"> <tr><td>1</td><td>1 = Not at all feasible</td></tr> <tr><td>2</td><td>2 = Somewhat feasible</td></tr> <tr><td>3</td><td>3 = Moderately feasible</td></tr> <tr><td>4</td><td>4 = Very feasible</td></tr> <tr><td>5</td><td>5 = Extremely feasible</td></tr> </table>           | 1 | 1 = Not at all feasible   | 2 | 2 = Somewhat feasible   | 3 | 3 = Moderately feasible   | 4 | 4 = Very feasible   | 5 | 5 = Extremely feasible   |
| 1  | 1 = Not at all feasible                                                                             |                                                                                                                                                                                                                                                                                              |                                                                                                                                                                                                                                                                                                                         |   |                           |   |                         |   |                           |   |                     |   |                          |
| 2  | 2 = Somewhat feasible                                                                               |                                                                                                                                                                                                                                                                                              |                                                                                                                                                                                                                                                                                                                         |   |                           |   |                         |   |                           |   |                     |   |                          |
| 3  | 3 = Moderately feasible                                                                             |                                                                                                                                                                                                                                                                                              |                                                                                                                                                                                                                                                                                                                         |   |                           |   |                         |   |                           |   |                     |   |                          |
| 4  | 4 = Very feasible                                                                                   |                                                                                                                                                                                                                                                                                              |                                                                                                                                                                                                                                                                                                                         |   |                           |   |                         |   |                           |   |                     |   |                          |
| 5  | 5 = Extremely feasible                                                                              |                                                                                                                                                                                                                                                                                              |                                                                                                                                                                                                                                                                                                                         |   |                           |   |                         |   |                           |   |                     |   |                          |
| 12 | <p>section_1_action_1_d</p> <p>Show the field ONLY if:<br/>[section_1_action_1_yes_no] = '1'</p>    | <p>D. How costly (in terms of staff time, equipment, and other) was developing bundle-related educational materials?</p>                                                                                                                                                                     | <p>radio, Required</p> <table border="1"> <tr><td>1</td><td>1 =Not at all costly</td></tr> <tr><td>2</td><td>2 = Somewhat costly</td></tr> <tr><td>3</td><td>3 = Moderately costly</td></tr> <tr><td>4</td><td>4 = Very costly</td></tr> <tr><td>5</td><td>5 = Extremely costly</td></tr> </table>                      | 1 | 1 =Not at all costly      | 2 | 2 = Somewhat costly     | 3 | 3 = Moderately costly     | 4 | 4 = Very costly     | 5 | 5 = Extremely costly     |
| 1  | 1 =Not at all costly                                                                                |                                                                                                                                                                                                                                                                                              |                                                                                                                                                                                                                                                                                                                         |   |                           |   |                         |   |                           |   |                     |   |                          |
| 2  | 2 = Somewhat costly                                                                                 |                                                                                                                                                                                                                                                                                              |                                                                                                                                                                                                                                                                                                                         |   |                           |   |                         |   |                           |   |                     |   |                          |
| 3  | 3 = Moderately costly                                                                               |                                                                                                                                                                                                                                                                                              |                                                                                                                                                                                                                                                                                                                         |   |                           |   |                         |   |                           |   |                     |   |                          |
| 4  | 4 = Very costly                                                                                     |                                                                                                                                                                                                                                                                                              |                                                                                                                                                                                                                                                                                                                         |   |                           |   |                         |   |                           |   |                     |   |                          |
| 5  | 5 = Extremely costly                                                                                |                                                                                                                                                                                                                                                                                              |                                                                                                                                                                                                                                                                                                                         |   |                           |   |                         |   |                           |   |                     |   |                          |
| 13 | <p>section_1_action_2_yes_no</p>                                                                    | <p>Action 2: Distribute educational materials</p> <p>Q: Did your institution distribute ABCDEF bundle educational materials (including guidelines, manuals, and toolkits) in person, by mail, or electronically?</p> <p>If action not used, mark "No" and go to next reflection question</p> | <p>yesno, Required</p> <table border="1"> <tr><td>1</td><td>Yes</td></tr> <tr><td>0</td><td>No</td></tr> </table> <p>Custom alignment: RH</p>                                                                                                                                                                           | 1 | Yes                       | 0 | No                      |   |                           |   |                     |   |                          |
| 1  | Yes                                                                                                 |                                                                                                                                                                                                                                                                                              |                                                                                                                                                                                                                                                                                                                         |   |                           |   |                         |   |                           |   |                     |   |                          |
| 0  | No                                                                                                  |                                                                                                                                                                                                                                                                                              |                                                                                                                                                                                                                                                                                                                         |   |                           |   |                         |   |                           |   |                     |   |                          |
| 14 | <p>section_1_action_2_text</p> <p>Show the field ONLY if:<br/>[section_1_action_2_yes_no] = '1'</p> | <p>When reflecting on your ICU's ABCDEF bundle implementation efforts:</p>                                                                                                                                                                                                                   | <p>descriptive</p>                                                                                                                                                                                                                                                                                                      |   |                           |   |                         |   |                           |   |                     |   |                          |
| 15 | <p>section_1_action_2_a</p> <p>Show the field ONLY if:<br/>[section_1_action_2_yes_no] = '1'</p>    | <p>A. How helpful was distributing educational material for increasing bundle adoption?</p>                                                                                                                                                                                                  | <p>radio, Required</p> <table border="1"> <tr><td>1</td><td>1 = Not at all helpful</td></tr> <tr><td>2</td><td>2 = Somewhat helpful</td></tr> <tr><td>3</td><td>3 = Moderately helpful</td></tr> <tr><td>4</td><td>4 = Very helpful</td></tr> <tr><td>5</td><td>5 = Extremely helpful</td></tr> </table>                | 1 | 1 = Not at all helpful    | 2 | 2 = Somewhat helpful    | 3 | 3 = Moderately helpful    | 4 | 4 = Very helpful    | 5 | 5 = Extremely helpful    |
| 1  | 1 = Not at all helpful                                                                              |                                                                                                                                                                                                                                                                                              |                                                                                                                                                                                                                                                                                                                         |   |                           |   |                         |   |                           |   |                     |   |                          |
| 2  | 2 = Somewhat helpful                                                                                |                                                                                                                                                                                                                                                                                              |                                                                                                                                                                                                                                                                                                                         |   |                           |   |                         |   |                           |   |                     |   |                          |
| 3  | 3 = Moderately helpful                                                                              |                                                                                                                                                                                                                                                                                              |                                                                                                                                                                                                                                                                                                                         |   |                           |   |                         |   |                           |   |                     |   |                          |
| 4  | 4 = Very helpful                                                                                    |                                                                                                                                                                                                                                                                                              |                                                                                                                                                                                                                                                                                                                         |   |                           |   |                         |   |                           |   |                     |   |                          |
| 5  | 5 = Extremely helpful                                                                               |                                                                                                                                                                                                                                                                                              |                                                                                                                                                                                                                                                                                                                         |   |                           |   |                         |   |                           |   |                     |   |                          |
| 16 | <p>section_1_action_2_b</p> <p>Show the field ONLY if:<br/>[section_1_action_2_yes_no] = '1'</p>    | <p>B. How acceptable was distributing bundle-related educational materials among ICU team members?</p>                                                                                                                                                                                       | <p>radio, Required</p> <table border="1"> <tr><td>1</td><td>1 = Not at all acceptable</td></tr> <tr><td>2</td><td>2 = Somewhat acceptable</td></tr> <tr><td>3</td><td>3 = Moderately acceptable</td></tr> <tr><td>4</td><td>4 = Very acceptable</td></tr> <tr><td>5</td><td>5 = Extremely acceptable</td></tr> </table> | 1 | 1 = Not at all acceptable | 2 | 2 = Somewhat acceptable | 3 | 3 = Moderately acceptable | 4 | 4 = Very acceptable | 5 | 5 = Extremely acceptable |
| 1  | 1 = Not at all acceptable                                                                           |                                                                                                                                                                                                                                                                                              |                                                                                                                                                                                                                                                                                                                         |   |                           |   |                         |   |                           |   |                     |   |                          |
| 2  | 2 = Somewhat acceptable                                                                             |                                                                                                                                                                                                                                                                                              |                                                                                                                                                                                                                                                                                                                         |   |                           |   |                         |   |                           |   |                     |   |                          |
| 3  | 3 = Moderately acceptable                                                                           |                                                                                                                                                                                                                                                                                              |                                                                                                                                                                                                                                                                                                                         |   |                           |   |                         |   |                           |   |                     |   |                          |
| 4  | 4 = Very acceptable                                                                                 |                                                                                                                                                                                                                                                                                              |                                                                                                                                                                                                                                                                                                                         |   |                           |   |                         |   |                           |   |                     |   |                          |
| 5  | 5 = Extremely acceptable                                                                            |                                                                                                                                                                                                                                                                                              |                                                                                                                                                                                                                                                                                                                         |   |                           |   |                         |   |                           |   |                     |   |                          |

|    |                                                                                                     |                                                                                                                                                                                                                                                                                                                                                                                        |                                                                                                                                                                                                                                                                                                                         |   |                           |   |                         |   |                           |   |                     |   |                          |
|----|-----------------------------------------------------------------------------------------------------|----------------------------------------------------------------------------------------------------------------------------------------------------------------------------------------------------------------------------------------------------------------------------------------------------------------------------------------------------------------------------------------|-------------------------------------------------------------------------------------------------------------------------------------------------------------------------------------------------------------------------------------------------------------------------------------------------------------------------|---|---------------------------|---|-------------------------|---|---------------------------|---|---------------------|---|--------------------------|
| 17 | <p>section_1_action_2_c</p> <p>Show the field ONLY if:<br/>[section_1_action_2_yes_no] = '1'</p>    | <p>C. How feasible was it to distribute bundle-related educational materials?</p>                                                                                                                                                                                                                                                                                                      | <p>radio, Required</p> <table border="1"> <tr><td>1</td><td>1 = Not at all feasible</td></tr> <tr><td>2</td><td>2 = Somewhat feasible</td></tr> <tr><td>3</td><td>3 = Moderately feasible</td></tr> <tr><td>4</td><td>4 = Very feasible</td></tr> <tr><td>5</td><td>5 = Extremely feasible</td></tr> </table>           | 1 | 1 = Not at all feasible   | 2 | 2 = Somewhat feasible   | 3 | 3 = Moderately feasible   | 4 | 4 = Very feasible   | 5 | 5 = Extremely feasible   |
| 1  | 1 = Not at all feasible                                                                             |                                                                                                                                                                                                                                                                                                                                                                                        |                                                                                                                                                                                                                                                                                                                         |   |                           |   |                         |   |                           |   |                     |   |                          |
| 2  | 2 = Somewhat feasible                                                                               |                                                                                                                                                                                                                                                                                                                                                                                        |                                                                                                                                                                                                                                                                                                                         |   |                           |   |                         |   |                           |   |                     |   |                          |
| 3  | 3 = Moderately feasible                                                                             |                                                                                                                                                                                                                                                                                                                                                                                        |                                                                                                                                                                                                                                                                                                                         |   |                           |   |                         |   |                           |   |                     |   |                          |
| 4  | 4 = Very feasible                                                                                   |                                                                                                                                                                                                                                                                                                                                                                                        |                                                                                                                                                                                                                                                                                                                         |   |                           |   |                         |   |                           |   |                     |   |                          |
| 5  | 5 = Extremely feasible                                                                              |                                                                                                                                                                                                                                                                                                                                                                                        |                                                                                                                                                                                                                                                                                                                         |   |                           |   |                         |   |                           |   |                     |   |                          |
| 18 | <p>section_1_action_2_d</p> <p>Show the field ONLY if:<br/>[section_1_action_2_yes_no] = '1'</p>    | <p>D. How costly (in terms of staff time, equipment, and other) was distributing bundle-related educational materials?</p>                                                                                                                                                                                                                                                             | <p>radio, Required</p> <table border="1"> <tr><td>1</td><td>1 =Not at all costly</td></tr> <tr><td>2</td><td>2 = Somewhat costly</td></tr> <tr><td>3</td><td>3 = Moderately costly</td></tr> <tr><td>4</td><td>4 = Very costly</td></tr> <tr><td>5</td><td>5 = Extremely costly</td></tr> </table>                      | 1 | 1 =Not at all costly      | 2 | 2 = Somewhat costly     | 3 | 3 = Moderately costly     | 4 | 4 = Very costly     | 5 | 5 = Extremely costly     |
| 1  | 1 =Not at all costly                                                                                |                                                                                                                                                                                                                                                                                                                                                                                        |                                                                                                                                                                                                                                                                                                                         |   |                           |   |                         |   |                           |   |                     |   |                          |
| 2  | 2 = Somewhat costly                                                                                 |                                                                                                                                                                                                                                                                                                                                                                                        |                                                                                                                                                                                                                                                                                                                         |   |                           |   |                         |   |                           |   |                     |   |                          |
| 3  | 3 = Moderately costly                                                                               |                                                                                                                                                                                                                                                                                                                                                                                        |                                                                                                                                                                                                                                                                                                                         |   |                           |   |                         |   |                           |   |                     |   |                          |
| 4  | 4 = Very costly                                                                                     |                                                                                                                                                                                                                                                                                                                                                                                        |                                                                                                                                                                                                                                                                                                                         |   |                           |   |                         |   |                           |   |                     |   |                          |
| 5  | 5 = Extremely costly                                                                                |                                                                                                                                                                                                                                                                                                                                                                                        |                                                                                                                                                                                                                                                                                                                         |   |                           |   |                         |   |                           |   |                     |   |                          |
| 19 | <p>section_1_action_3_yes_no</p>                                                                    | <p>Action 3: Conduct educational meetings</p> <p>Q: Did your institution hold meetings targeted toward different stakeholder groups (e.g., providers, administrators, other organizational stakeholders, and patient, family, consumer, and community stakeholders) to teach them about the ABCDEF bundle?</p> <p>If action not used, mark "No" and go to next reflection question</p> | <p>yesno, Required</p> <table border="1"> <tr><td>1</td><td>Yes</td></tr> <tr><td>0</td><td>No</td></tr> </table> <p>Custom alignment: RH</p>                                                                                                                                                                           | 1 | Yes                       | 0 | No                      |   |                           |   |                     |   |                          |
| 1  | Yes                                                                                                 |                                                                                                                                                                                                                                                                                                                                                                                        |                                                                                                                                                                                                                                                                                                                         |   |                           |   |                         |   |                           |   |                     |   |                          |
| 0  | No                                                                                                  |                                                                                                                                                                                                                                                                                                                                                                                        |                                                                                                                                                                                                                                                                                                                         |   |                           |   |                         |   |                           |   |                     |   |                          |
| 20 | <p>section_1_action_3_text</p> <p>Show the field ONLY if:<br/>[section_1_action_3_yes_no] = '1'</p> | <p>When reflecting on your ICU's ABCDEF bundle implementation efforts:</p>                                                                                                                                                                                                                                                                                                             | <p>descriptive</p>                                                                                                                                                                                                                                                                                                      |   |                           |   |                         |   |                           |   |                     |   |                          |
| 21 | <p>section_1_action_3_a</p> <p>Show the field ONLY if:<br/>[section_1_action_3_yes_no] = '1'</p>    | <p>A. How helpful was conducting educational meetings for increasing bundle adoption?</p>                                                                                                                                                                                                                                                                                              | <p>radio, Required</p> <table border="1"> <tr><td>1</td><td>1 = Not at all helpful</td></tr> <tr><td>2</td><td>2 = Somewhat helpful</td></tr> <tr><td>3</td><td>3 = Moderately helpful</td></tr> <tr><td>4</td><td>4 = Very helpful</td></tr> <tr><td>5</td><td>5 = Extremely helpful</td></tr> </table>                | 1 | 1 = Not at all helpful    | 2 | 2 = Somewhat helpful    | 3 | 3 = Moderately helpful    | 4 | 4 = Very helpful    | 5 | 5 = Extremely helpful    |
| 1  | 1 = Not at all helpful                                                                              |                                                                                                                                                                                                                                                                                                                                                                                        |                                                                                                                                                                                                                                                                                                                         |   |                           |   |                         |   |                           |   |                     |   |                          |
| 2  | 2 = Somewhat helpful                                                                                |                                                                                                                                                                                                                                                                                                                                                                                        |                                                                                                                                                                                                                                                                                                                         |   |                           |   |                         |   |                           |   |                     |   |                          |
| 3  | 3 = Moderately helpful                                                                              |                                                                                                                                                                                                                                                                                                                                                                                        |                                                                                                                                                                                                                                                                                                                         |   |                           |   |                         |   |                           |   |                     |   |                          |
| 4  | 4 = Very helpful                                                                                    |                                                                                                                                                                                                                                                                                                                                                                                        |                                                                                                                                                                                                                                                                                                                         |   |                           |   |                         |   |                           |   |                     |   |                          |
| 5  | 5 = Extremely helpful                                                                               |                                                                                                                                                                                                                                                                                                                                                                                        |                                                                                                                                                                                                                                                                                                                         |   |                           |   |                         |   |                           |   |                     |   |                          |
| 22 | <p>section_1_action_3_b</p> <p>Show the field ONLY if:<br/>[section_1_action_3_yes_no] = '1'</p>    | <p>B. How acceptable was conducting bundle-related educational meetings among ICU team members?</p>                                                                                                                                                                                                                                                                                    | <p>radio, Required</p> <table border="1"> <tr><td>1</td><td>1 = Not at all acceptable</td></tr> <tr><td>2</td><td>2 = Somewhat acceptable</td></tr> <tr><td>3</td><td>3 = Moderately acceptable</td></tr> <tr><td>4</td><td>4 = Very acceptable</td></tr> <tr><td>5</td><td>5 = Extremely acceptable</td></tr> </table> | 1 | 1 = Not at all acceptable | 2 | 2 = Somewhat acceptable | 3 | 3 = Moderately acceptable | 4 | 4 = Very acceptable | 5 | 5 = Extremely acceptable |
| 1  | 1 = Not at all acceptable                                                                           |                                                                                                                                                                                                                                                                                                                                                                                        |                                                                                                                                                                                                                                                                                                                         |   |                           |   |                         |   |                           |   |                     |   |                          |
| 2  | 2 = Somewhat acceptable                                                                             |                                                                                                                                                                                                                                                                                                                                                                                        |                                                                                                                                                                                                                                                                                                                         |   |                           |   |                         |   |                           |   |                     |   |                          |
| 3  | 3 = Moderately acceptable                                                                           |                                                                                                                                                                                                                                                                                                                                                                                        |                                                                                                                                                                                                                                                                                                                         |   |                           |   |                         |   |                           |   |                     |   |                          |
| 4  | 4 = Very acceptable                                                                                 |                                                                                                                                                                                                                                                                                                                                                                                        |                                                                                                                                                                                                                                                                                                                         |   |                           |   |                         |   |                           |   |                     |   |                          |
| 5  | 5 = Extremely acceptable                                                                            |                                                                                                                                                                                                                                                                                                                                                                                        |                                                                                                                                                                                                                                                                                                                         |   |                           |   |                         |   |                           |   |                     |   |                          |
| 23 | <p>section_1_action_3_c</p> <p>Show the field ONLY if:<br/>[section_1_action_3_yes_no] = '1'</p>    | <p>C. How feasible was it to conduct bundle-related educational meetings?</p>                                                                                                                                                                                                                                                                                                          | <p>radio, Required</p> <table border="1"> <tr><td>1</td><td>1 = Not at all feasible</td></tr> <tr><td>2</td><td>2 = Somewhat feasible</td></tr> <tr><td>3</td><td>3 = Moderately feasible</td></tr> <tr><td>4</td><td>4 = Very feasible</td></tr> <tr><td>5</td><td>5 = Extremely feasible</td></tr> </table>           | 1 | 1 = Not at all feasible   | 2 | 2 = Somewhat feasible   | 3 | 3 = Moderately feasible   | 4 | 4 = Very feasible   | 5 | 5 = Extremely feasible   |
| 1  | 1 = Not at all feasible                                                                             |                                                                                                                                                                                                                                                                                                                                                                                        |                                                                                                                                                                                                                                                                                                                         |   |                           |   |                         |   |                           |   |                     |   |                          |
| 2  | 2 = Somewhat feasible                                                                               |                                                                                                                                                                                                                                                                                                                                                                                        |                                                                                                                                                                                                                                                                                                                         |   |                           |   |                         |   |                           |   |                     |   |                          |
| 3  | 3 = Moderately feasible                                                                             |                                                                                                                                                                                                                                                                                                                                                                                        |                                                                                                                                                                                                                                                                                                                         |   |                           |   |                         |   |                           |   |                     |   |                          |
| 4  | 4 = Very feasible                                                                                   |                                                                                                                                                                                                                                                                                                                                                                                        |                                                                                                                                                                                                                                                                                                                         |   |                           |   |                         |   |                           |   |                     |   |                          |
| 5  | 5 = Extremely feasible                                                                              |                                                                                                                                                                                                                                                                                                                                                                                        |                                                                                                                                                                                                                                                                                                                         |   |                           |   |                         |   |                           |   |                     |   |                          |
| 24 | <p>section_1_action_3_d</p> <p>Show the field ONLY if:<br/>[section_1_action_3_yes_no] = '1'</p>    | <p>D. How costly (in terms of staff time, equipment, and other) was conducting bundle-related educational meetings?</p>                                                                                                                                                                                                                                                                | <p>radio, Required</p> <table border="1"> <tr><td>1</td><td>1 =Not at all costly</td></tr> <tr><td>2</td><td>2 = Somewhat costly</td></tr> <tr><td>3</td><td>3 = Moderately costly</td></tr> <tr><td>4</td><td>4 = Very costly</td></tr> <tr><td>5</td><td>5 = Extremely costly</td></tr> </table>                      | 1 | 1 =Not at all costly      | 2 | 2 = Somewhat costly     | 3 | 3 = Moderately costly     | 4 | 4 = Very costly     | 5 | 5 = Extremely costly     |
| 1  | 1 =Not at all costly                                                                                |                                                                                                                                                                                                                                                                                                                                                                                        |                                                                                                                                                                                                                                                                                                                         |   |                           |   |                         |   |                           |   |                     |   |                          |
| 2  | 2 = Somewhat costly                                                                                 |                                                                                                                                                                                                                                                                                                                                                                                        |                                                                                                                                                                                                                                                                                                                         |   |                           |   |                         |   |                           |   |                     |   |                          |
| 3  | 3 = Moderately costly                                                                               |                                                                                                                                                                                                                                                                                                                                                                                        |                                                                                                                                                                                                                                                                                                                         |   |                           |   |                         |   |                           |   |                     |   |                          |
| 4  | 4 = Very costly                                                                                     |                                                                                                                                                                                                                                                                                                                                                                                        |                                                                                                                                                                                                                                                                                                                         |   |                           |   |                         |   |                           |   |                     |   |                          |
| 5  | 5 = Extremely costly                                                                                |                                                                                                                                                                                                                                                                                                                                                                                        |                                                                                                                                                                                                                                                                                                                         |   |                           |   |                         |   |                           |   |                     |   |                          |
| 25 | <p>section_1_action_4_yes_no</p>                                                                    | <p>Action 4: Make training dynamic</p> <p>Q: Did your institution vary the information delivery methods to cater to different learning styles and work contexts, and shape ABCDEF bundle training to be interactive?</p> <p>If action not used, mark "No" and go to next reflection question</p>                                                                                       | <p>yesno, Required</p> <table border="1"> <tr><td>1</td><td>Yes</td></tr> <tr><td>0</td><td>No</td></tr> </table> <p>Custom alignment: RH</p>                                                                                                                                                                           | 1 | Yes                       | 0 | No                      |   |                           |   |                     |   |                          |
| 1  | Yes                                                                                                 |                                                                                                                                                                                                                                                                                                                                                                                        |                                                                                                                                                                                                                                                                                                                         |   |                           |   |                         |   |                           |   |                     |   |                          |
| 0  | No                                                                                                  |                                                                                                                                                                                                                                                                                                                                                                                        |                                                                                                                                                                                                                                                                                                                         |   |                           |   |                         |   |                           |   |                     |   |                          |

|    |                                                                                                     |                                                                                                                                                                                                                 |                                                                                                                                                                                                                                                                                                                         |   |                           |   |                         |   |                           |   |                     |   |                          |
|----|-----------------------------------------------------------------------------------------------------|-----------------------------------------------------------------------------------------------------------------------------------------------------------------------------------------------------------------|-------------------------------------------------------------------------------------------------------------------------------------------------------------------------------------------------------------------------------------------------------------------------------------------------------------------------|---|---------------------------|---|-------------------------|---|---------------------------|---|---------------------|---|--------------------------|
| 26 | <p>section_1_action_4_text</p> <p>Show the field ONLY if:<br/>[section_1_action_4_yes_no] = '1'</p> | <p>When reflecting on your ICU's ABCDEF bundle implementation efforts:</p>                                                                                                                                      | <p>descriptive</p>                                                                                                                                                                                                                                                                                                      |   |                           |   |                         |   |                           |   |                     |   |                          |
| 27 | <p>section_1_action_4_a</p> <p>Show the field ONLY if:<br/>[section_1_action_4_yes_no] = '1'</p>    | <p>A. How helpful was making training dynamic for increasing bundle adoption?</p>                                                                                                                               | <p>radio, Required</p> <table border="1"> <tr><td>1</td><td>1 = Not at all helpful</td></tr> <tr><td>2</td><td>2 = Somewhat helpful</td></tr> <tr><td>3</td><td>3 = Moderately helpful</td></tr> <tr><td>4</td><td>4 = Very helpful</td></tr> <tr><td>5</td><td>5 = Extremely helpful</td></tr> </table>                | 1 | 1 = Not at all helpful    | 2 | 2 = Somewhat helpful    | 3 | 3 = Moderately helpful    | 4 | 4 = Very helpful    | 5 | 5 = Extremely helpful    |
| 1  | 1 = Not at all helpful                                                                              |                                                                                                                                                                                                                 |                                                                                                                                                                                                                                                                                                                         |   |                           |   |                         |   |                           |   |                     |   |                          |
| 2  | 2 = Somewhat helpful                                                                                |                                                                                                                                                                                                                 |                                                                                                                                                                                                                                                                                                                         |   |                           |   |                         |   |                           |   |                     |   |                          |
| 3  | 3 = Moderately helpful                                                                              |                                                                                                                                                                                                                 |                                                                                                                                                                                                                                                                                                                         |   |                           |   |                         |   |                           |   |                     |   |                          |
| 4  | 4 = Very helpful                                                                                    |                                                                                                                                                                                                                 |                                                                                                                                                                                                                                                                                                                         |   |                           |   |                         |   |                           |   |                     |   |                          |
| 5  | 5 = Extremely helpful                                                                               |                                                                                                                                                                                                                 |                                                                                                                                                                                                                                                                                                                         |   |                           |   |                         |   |                           |   |                     |   |                          |
| 28 | <p>section_1_action_4_b</p> <p>Show the field ONLY if:<br/>[section_1_action_4_yes_no] = '1'</p>    | <p>B. How acceptable was making bundle-related training dynamic among ICU team members?</p>                                                                                                                     | <p>radio, Required</p> <table border="1"> <tr><td>1</td><td>1 = Not at all acceptable</td></tr> <tr><td>2</td><td>2 = Somewhat acceptable</td></tr> <tr><td>3</td><td>3 = Moderately acceptable</td></tr> <tr><td>4</td><td>4 = Very acceptable</td></tr> <tr><td>5</td><td>5 = Extremely acceptable</td></tr> </table> | 1 | 1 = Not at all acceptable | 2 | 2 = Somewhat acceptable | 3 | 3 = Moderately acceptable | 4 | 4 = Very acceptable | 5 | 5 = Extremely acceptable |
| 1  | 1 = Not at all acceptable                                                                           |                                                                                                                                                                                                                 |                                                                                                                                                                                                                                                                                                                         |   |                           |   |                         |   |                           |   |                     |   |                          |
| 2  | 2 = Somewhat acceptable                                                                             |                                                                                                                                                                                                                 |                                                                                                                                                                                                                                                                                                                         |   |                           |   |                         |   |                           |   |                     |   |                          |
| 3  | 3 = Moderately acceptable                                                                           |                                                                                                                                                                                                                 |                                                                                                                                                                                                                                                                                                                         |   |                           |   |                         |   |                           |   |                     |   |                          |
| 4  | 4 = Very acceptable                                                                                 |                                                                                                                                                                                                                 |                                                                                                                                                                                                                                                                                                                         |   |                           |   |                         |   |                           |   |                     |   |                          |
| 5  | 5 = Extremely acceptable                                                                            |                                                                                                                                                                                                                 |                                                                                                                                                                                                                                                                                                                         |   |                           |   |                         |   |                           |   |                     |   |                          |
| 29 | <p>section_1_action_4_c</p> <p>Show the field ONLY if:<br/>[section_1_action_4_yes_no] = '1'</p>    | <p>C. How feasible was it to make bundle-related training dynamic?</p>                                                                                                                                          | <p>radio, Required</p> <table border="1"> <tr><td>1</td><td>1 = Not at all feasible</td></tr> <tr><td>2</td><td>2 = Somewhat feasible</td></tr> <tr><td>3</td><td>3 = Moderately feasible</td></tr> <tr><td>4</td><td>4 = Very feasible</td></tr> <tr><td>5</td><td>5 = Extremely feasible</td></tr> </table>           | 1 | 1 = Not at all feasible   | 2 | 2 = Somewhat feasible   | 3 | 3 = Moderately feasible   | 4 | 4 = Very feasible   | 5 | 5 = Extremely feasible   |
| 1  | 1 = Not at all feasible                                                                             |                                                                                                                                                                                                                 |                                                                                                                                                                                                                                                                                                                         |   |                           |   |                         |   |                           |   |                     |   |                          |
| 2  | 2 = Somewhat feasible                                                                               |                                                                                                                                                                                                                 |                                                                                                                                                                                                                                                                                                                         |   |                           |   |                         |   |                           |   |                     |   |                          |
| 3  | 3 = Moderately feasible                                                                             |                                                                                                                                                                                                                 |                                                                                                                                                                                                                                                                                                                         |   |                           |   |                         |   |                           |   |                     |   |                          |
| 4  | 4 = Very feasible                                                                                   |                                                                                                                                                                                                                 |                                                                                                                                                                                                                                                                                                                         |   |                           |   |                         |   |                           |   |                     |   |                          |
| 5  | 5 = Extremely feasible                                                                              |                                                                                                                                                                                                                 |                                                                                                                                                                                                                                                                                                                         |   |                           |   |                         |   |                           |   |                     |   |                          |
| 30 | <p>section_1_action_4_d</p> <p>Show the field ONLY if:<br/>[section_1_action_4_yes_no] = '1'</p>    | <p>D. How costly (in terms of staff time, equipment, and other) was making bundle-related training dynamic?</p>                                                                                                 | <p>radio, Required</p> <table border="1"> <tr><td>1</td><td>1 =Not at all costly</td></tr> <tr><td>2</td><td>2 = Somewhat costly</td></tr> <tr><td>3</td><td>3 = Moderately costly</td></tr> <tr><td>4</td><td>4 = Very costly</td></tr> <tr><td>5</td><td>5 = Extremely costly</td></tr> </table>                      | 1 | 1 =Not at all costly      | 2 | 2 = Somewhat costly     | 3 | 3 = Moderately costly     | 4 | 4 = Very costly     | 5 | 5 = Extremely costly     |
| 1  | 1 =Not at all costly                                                                                |                                                                                                                                                                                                                 |                                                                                                                                                                                                                                                                                                                         |   |                           |   |                         |   |                           |   |                     |   |                          |
| 2  | 2 = Somewhat costly                                                                                 |                                                                                                                                                                                                                 |                                                                                                                                                                                                                                                                                                                         |   |                           |   |                         |   |                           |   |                     |   |                          |
| 3  | 3 = Moderately costly                                                                               |                                                                                                                                                                                                                 |                                                                                                                                                                                                                                                                                                                         |   |                           |   |                         |   |                           |   |                     |   |                          |
| 4  | 4 = Very costly                                                                                     |                                                                                                                                                                                                                 |                                                                                                                                                                                                                                                                                                                         |   |                           |   |                         |   |                           |   |                     |   |                          |
| 5  | 5 = Extremely costly                                                                                |                                                                                                                                                                                                                 |                                                                                                                                                                                                                                                                                                                         |   |                           |   |                         |   |                           |   |                     |   |                          |
| 31 | <p>section_1_action_5_yes_no</p>                                                                    | <p>Action 5: Conduct ongoing training</p> <p>Q: Did your institution plan for and conduct ABCDEF bundle training in an ongoing way?</p> <p>If action not used, mark "No" and go to next reflection question</p> | <p>yesno, Required</p> <table border="1"> <tr><td>1</td><td>Yes</td></tr> <tr><td>0</td><td>No</td></tr> </table> <p>Custom alignment: RH</p>                                                                                                                                                                           | 1 | Yes                       | 0 | No                      |   |                           |   |                     |   |                          |
| 1  | Yes                                                                                                 |                                                                                                                                                                                                                 |                                                                                                                                                                                                                                                                                                                         |   |                           |   |                         |   |                           |   |                     |   |                          |
| 0  | No                                                                                                  |                                                                                                                                                                                                                 |                                                                                                                                                                                                                                                                                                                         |   |                           |   |                         |   |                           |   |                     |   |                          |
| 32 | <p>section_1_action_5_text</p> <p>Show the field ONLY if:<br/>[section_1_action_5_yes_no] = '1'</p> | <p>When reflecting on your ICU's ABCDEF bundle implementation efforts:</p>                                                                                                                                      | <p>descriptive</p>                                                                                                                                                                                                                                                                                                      |   |                           |   |                         |   |                           |   |                     |   |                          |
| 33 | <p>section_1_action_5_a</p> <p>Show the field ONLY if:<br/>[section_1_action_5_yes_no] = '1'</p>    | <p>A. How helpful was conducting ongoing training for increasing bundle adoption?</p>                                                                                                                           | <p>radio, Required</p> <table border="1"> <tr><td>1</td><td>1 = Not at all helpful</td></tr> <tr><td>2</td><td>2 = Somewhat helpful</td></tr> <tr><td>3</td><td>3 = Moderately helpful</td></tr> <tr><td>4</td><td>4 = Very helpful</td></tr> <tr><td>5</td><td>5 = Extremely helpful</td></tr> </table>                | 1 | 1 = Not at all helpful    | 2 | 2 = Somewhat helpful    | 3 | 3 = Moderately helpful    | 4 | 4 = Very helpful    | 5 | 5 = Extremely helpful    |
| 1  | 1 = Not at all helpful                                                                              |                                                                                                                                                                                                                 |                                                                                                                                                                                                                                                                                                                         |   |                           |   |                         |   |                           |   |                     |   |                          |
| 2  | 2 = Somewhat helpful                                                                                |                                                                                                                                                                                                                 |                                                                                                                                                                                                                                                                                                                         |   |                           |   |                         |   |                           |   |                     |   |                          |
| 3  | 3 = Moderately helpful                                                                              |                                                                                                                                                                                                                 |                                                                                                                                                                                                                                                                                                                         |   |                           |   |                         |   |                           |   |                     |   |                          |
| 4  | 4 = Very helpful                                                                                    |                                                                                                                                                                                                                 |                                                                                                                                                                                                                                                                                                                         |   |                           |   |                         |   |                           |   |                     |   |                          |
| 5  | 5 = Extremely helpful                                                                               |                                                                                                                                                                                                                 |                                                                                                                                                                                                                                                                                                                         |   |                           |   |                         |   |                           |   |                     |   |                          |
| 34 | <p>section_1_action_5_b</p> <p>Show the field ONLY if:<br/>[section_1_action_5_yes_no] = '1'</p>    | <p>B. How acceptable was conducting ongoing bundle-related training among ICU team members?</p>                                                                                                                 | <p>radio, Required</p> <table border="1"> <tr><td>1</td><td>1 = Not at all acceptable</td></tr> <tr><td>2</td><td>2 = Somewhat acceptable</td></tr> <tr><td>3</td><td>3 = Moderately acceptable</td></tr> <tr><td>4</td><td>4 = Very acceptable</td></tr> <tr><td>5</td><td>5 = Extremely acceptable</td></tr> </table> | 1 | 1 = Not at all acceptable | 2 | 2 = Somewhat acceptable | 3 | 3 = Moderately acceptable | 4 | 4 = Very acceptable | 5 | 5 = Extremely acceptable |
| 1  | 1 = Not at all acceptable                                                                           |                                                                                                                                                                                                                 |                                                                                                                                                                                                                                                                                                                         |   |                           |   |                         |   |                           |   |                     |   |                          |
| 2  | 2 = Somewhat acceptable                                                                             |                                                                                                                                                                                                                 |                                                                                                                                                                                                                                                                                                                         |   |                           |   |                         |   |                           |   |                     |   |                          |
| 3  | 3 = Moderately acceptable                                                                           |                                                                                                                                                                                                                 |                                                                                                                                                                                                                                                                                                                         |   |                           |   |                         |   |                           |   |                     |   |                          |
| 4  | 4 = Very acceptable                                                                                 |                                                                                                                                                                                                                 |                                                                                                                                                                                                                                                                                                                         |   |                           |   |                         |   |                           |   |                     |   |                          |
| 5  | 5 = Extremely acceptable                                                                            |                                                                                                                                                                                                                 |                                                                                                                                                                                                                                                                                                                         |   |                           |   |                         |   |                           |   |                     |   |                          |

|    |                                                                                                     |                                                                                                                                                                                                                                                                                                                                   |                                                                                                                                                                                                                                                                                                                         |   |                           |   |                         |   |                           |   |                     |   |                          |
|----|-----------------------------------------------------------------------------------------------------|-----------------------------------------------------------------------------------------------------------------------------------------------------------------------------------------------------------------------------------------------------------------------------------------------------------------------------------|-------------------------------------------------------------------------------------------------------------------------------------------------------------------------------------------------------------------------------------------------------------------------------------------------------------------------|---|---------------------------|---|-------------------------|---|---------------------------|---|---------------------|---|--------------------------|
| 35 | <p>section_1_action_5_c</p> <p>Show the field ONLY if:<br/>[section_1_action_5_yes_no] = '1'</p>    | <p>C. How feasible was it to conduct ongoing bundle-related training?</p>                                                                                                                                                                                                                                                         | <p>radio, Required</p> <table border="1"> <tr><td>1</td><td>1 = Not at all feasible</td></tr> <tr><td>2</td><td>2 = Somewhat feasible</td></tr> <tr><td>3</td><td>3 = Moderately feasible</td></tr> <tr><td>4</td><td>4 = Very feasible</td></tr> <tr><td>5</td><td>5 = Extremely feasible</td></tr> </table>           | 1 | 1 = Not at all feasible   | 2 | 2 = Somewhat feasible   | 3 | 3 = Moderately feasible   | 4 | 4 = Very feasible   | 5 | 5 = Extremely feasible   |
| 1  | 1 = Not at all feasible                                                                             |                                                                                                                                                                                                                                                                                                                                   |                                                                                                                                                                                                                                                                                                                         |   |                           |   |                         |   |                           |   |                     |   |                          |
| 2  | 2 = Somewhat feasible                                                                               |                                                                                                                                                                                                                                                                                                                                   |                                                                                                                                                                                                                                                                                                                         |   |                           |   |                         |   |                           |   |                     |   |                          |
| 3  | 3 = Moderately feasible                                                                             |                                                                                                                                                                                                                                                                                                                                   |                                                                                                                                                                                                                                                                                                                         |   |                           |   |                         |   |                           |   |                     |   |                          |
| 4  | 4 = Very feasible                                                                                   |                                                                                                                                                                                                                                                                                                                                   |                                                                                                                                                                                                                                                                                                                         |   |                           |   |                         |   |                           |   |                     |   |                          |
| 5  | 5 = Extremely feasible                                                                              |                                                                                                                                                                                                                                                                                                                                   |                                                                                                                                                                                                                                                                                                                         |   |                           |   |                         |   |                           |   |                     |   |                          |
| 36 | <p>section_1_action_5_d</p> <p>Show the field ONLY if:<br/>[section_1_action_5_yes_no] = '1'</p>    | <p>D. How costly (in terms of staff time, equipment, and other) was conducting ongoing bundle-related training?</p>                                                                                                                                                                                                               | <p>radio, Required</p> <table border="1"> <tr><td>1</td><td>1 =Not at all costly</td></tr> <tr><td>2</td><td>2 = Somewhat costly</td></tr> <tr><td>3</td><td>3 = Moderately costly</td></tr> <tr><td>4</td><td>4 = Very costly</td></tr> <tr><td>5</td><td>5 = Extremely costly</td></tr> </table>                      | 1 | 1 =Not at all costly      | 2 | 2 = Somewhat costly     | 3 | 3 = Moderately costly     | 4 | 4 = Very costly     | 5 | 5 = Extremely costly     |
| 1  | 1 =Not at all costly                                                                                |                                                                                                                                                                                                                                                                                                                                   |                                                                                                                                                                                                                                                                                                                         |   |                           |   |                         |   |                           |   |                     |   |                          |
| 2  | 2 = Somewhat costly                                                                                 |                                                                                                                                                                                                                                                                                                                                   |                                                                                                                                                                                                                                                                                                                         |   |                           |   |                         |   |                           |   |                     |   |                          |
| 3  | 3 = Moderately costly                                                                               |                                                                                                                                                                                                                                                                                                                                   |                                                                                                                                                                                                                                                                                                                         |   |                           |   |                         |   |                           |   |                     |   |                          |
| 4  | 4 = Very costly                                                                                     |                                                                                                                                                                                                                                                                                                                                   |                                                                                                                                                                                                                                                                                                                         |   |                           |   |                         |   |                           |   |                     |   |                          |
| 5  | 5 = Extremely costly                                                                                |                                                                                                                                                                                                                                                                                                                                   |                                                                                                                                                                                                                                                                                                                         |   |                           |   |                         |   |                           |   |                     |   |                          |
| 37 | <p>section_1_action_6_yes_no</p>                                                                    | <p>Action 6: Create a learning collaborative</p> <p>Q: Did your institution facilitate the formation of groups of providers or provider organizations and foster a collaborative learning environment to improve implementation of the ABCDEF bundle?</p> <p>If action not used, mark "No" and go to next reflection question</p> | <p>yesno, Required</p> <table border="1"> <tr><td>1</td><td>Yes</td></tr> <tr><td>0</td><td>No</td></tr> </table> <p>Custom alignment: RH</p>                                                                                                                                                                           | 1 | Yes                       | 0 | No                      |   |                           |   |                     |   |                          |
| 1  | Yes                                                                                                 |                                                                                                                                                                                                                                                                                                                                   |                                                                                                                                                                                                                                                                                                                         |   |                           |   |                         |   |                           |   |                     |   |                          |
| 0  | No                                                                                                  |                                                                                                                                                                                                                                                                                                                                   |                                                                                                                                                                                                                                                                                                                         |   |                           |   |                         |   |                           |   |                     |   |                          |
| 38 | <p>section_1_action_6_text</p> <p>Show the field ONLY if:<br/>[section_1_action_6_yes_no] = '1'</p> | <p>When reflecting on your ICU's ABCDEF bundle implementation efforts:</p>                                                                                                                                                                                                                                                        | <p>descriptive</p>                                                                                                                                                                                                                                                                                                      |   |                           |   |                         |   |                           |   |                     |   |                          |
| 39 | <p>section_1_action_6_a</p> <p>Show the field ONLY if:<br/>[section_1_action_6_yes_no] = '1'</p>    | <p>A. How helpful was creating a learning collaborative for increasing bundle adoption?</p>                                                                                                                                                                                                                                       | <p>radio, Required</p> <table border="1"> <tr><td>1</td><td>1 = Not at all helpful</td></tr> <tr><td>2</td><td>2 = Somewhat helpful</td></tr> <tr><td>3</td><td>3 = Moderately helpful</td></tr> <tr><td>4</td><td>4 = Very helpful</td></tr> <tr><td>5</td><td>5 = Extremely helpful</td></tr> </table>                | 1 | 1 = Not at all helpful    | 2 | 2 = Somewhat helpful    | 3 | 3 = Moderately helpful    | 4 | 4 = Very helpful    | 5 | 5 = Extremely helpful    |
| 1  | 1 = Not at all helpful                                                                              |                                                                                                                                                                                                                                                                                                                                   |                                                                                                                                                                                                                                                                                                                         |   |                           |   |                         |   |                           |   |                     |   |                          |
| 2  | 2 = Somewhat helpful                                                                                |                                                                                                                                                                                                                                                                                                                                   |                                                                                                                                                                                                                                                                                                                         |   |                           |   |                         |   |                           |   |                     |   |                          |
| 3  | 3 = Moderately helpful                                                                              |                                                                                                                                                                                                                                                                                                                                   |                                                                                                                                                                                                                                                                                                                         |   |                           |   |                         |   |                           |   |                     |   |                          |
| 4  | 4 = Very helpful                                                                                    |                                                                                                                                                                                                                                                                                                                                   |                                                                                                                                                                                                                                                                                                                         |   |                           |   |                         |   |                           |   |                     |   |                          |
| 5  | 5 = Extremely helpful                                                                               |                                                                                                                                                                                                                                                                                                                                   |                                                                                                                                                                                                                                                                                                                         |   |                           |   |                         |   |                           |   |                     |   |                          |
| 40 | <p>section_1_action_6_b</p> <p>Show the field ONLY if:<br/>[section_1_action_6_yes_no] = '1'</p>    | <p>B. How acceptable was creating a bundle-related learning collaborative among ICU team members?</p>                                                                                                                                                                                                                             | <p>radio, Required</p> <table border="1"> <tr><td>1</td><td>1 = Not at all acceptable</td></tr> <tr><td>2</td><td>2 = Somewhat acceptable</td></tr> <tr><td>3</td><td>3 = Moderately acceptable</td></tr> <tr><td>4</td><td>4 = Very acceptable</td></tr> <tr><td>5</td><td>5 = Extremely acceptable</td></tr> </table> | 1 | 1 = Not at all acceptable | 2 | 2 = Somewhat acceptable | 3 | 3 = Moderately acceptable | 4 | 4 = Very acceptable | 5 | 5 = Extremely acceptable |
| 1  | 1 = Not at all acceptable                                                                           |                                                                                                                                                                                                                                                                                                                                   |                                                                                                                                                                                                                                                                                                                         |   |                           |   |                         |   |                           |   |                     |   |                          |
| 2  | 2 = Somewhat acceptable                                                                             |                                                                                                                                                                                                                                                                                                                                   |                                                                                                                                                                                                                                                                                                                         |   |                           |   |                         |   |                           |   |                     |   |                          |
| 3  | 3 = Moderately acceptable                                                                           |                                                                                                                                                                                                                                                                                                                                   |                                                                                                                                                                                                                                                                                                                         |   |                           |   |                         |   |                           |   |                     |   |                          |
| 4  | 4 = Very acceptable                                                                                 |                                                                                                                                                                                                                                                                                                                                   |                                                                                                                                                                                                                                                                                                                         |   |                           |   |                         |   |                           |   |                     |   |                          |
| 5  | 5 = Extremely acceptable                                                                            |                                                                                                                                                                                                                                                                                                                                   |                                                                                                                                                                                                                                                                                                                         |   |                           |   |                         |   |                           |   |                     |   |                          |
| 41 | <p>section_1_action_6_c</p> <p>Show the field ONLY if:<br/>[section_1_action_6_yes_no] = '1'</p>    | <p>C. How feasible was it to create a bundle-related learning collaborative?</p>                                                                                                                                                                                                                                                  | <p>radio, Required</p> <table border="1"> <tr><td>1</td><td>1 = Not at all feasible</td></tr> <tr><td>2</td><td>2 = Somewhat feasible</td></tr> <tr><td>3</td><td>3 = Moderately feasible</td></tr> <tr><td>4</td><td>4 = Very feasible</td></tr> <tr><td>5</td><td>5 = Extremely feasible</td></tr> </table>           | 1 | 1 = Not at all feasible   | 2 | 2 = Somewhat feasible   | 3 | 3 = Moderately feasible   | 4 | 4 = Very feasible   | 5 | 5 = Extremely feasible   |
| 1  | 1 = Not at all feasible                                                                             |                                                                                                                                                                                                                                                                                                                                   |                                                                                                                                                                                                                                                                                                                         |   |                           |   |                         |   |                           |   |                     |   |                          |
| 2  | 2 = Somewhat feasible                                                                               |                                                                                                                                                                                                                                                                                                                                   |                                                                                                                                                                                                                                                                                                                         |   |                           |   |                         |   |                           |   |                     |   |                          |
| 3  | 3 = Moderately feasible                                                                             |                                                                                                                                                                                                                                                                                                                                   |                                                                                                                                                                                                                                                                                                                         |   |                           |   |                         |   |                           |   |                     |   |                          |
| 4  | 4 = Very feasible                                                                                   |                                                                                                                                                                                                                                                                                                                                   |                                                                                                                                                                                                                                                                                                                         |   |                           |   |                         |   |                           |   |                     |   |                          |
| 5  | 5 = Extremely feasible                                                                              |                                                                                                                                                                                                                                                                                                                                   |                                                                                                                                                                                                                                                                                                                         |   |                           |   |                         |   |                           |   |                     |   |                          |
| 42 | <p>section_1_action_6_d</p> <p>Show the field ONLY if:<br/>[section_1_action_6_yes_no] = '1'</p>    | <p>D. How costly (in terms of staff time, equipment, and other) was creating a bundle-related learning collaborative?</p>                                                                                                                                                                                                         | <p>radio, Required</p> <table border="1"> <tr><td>1</td><td>1 =Not at all costly</td></tr> <tr><td>2</td><td>2 = Somewhat costly</td></tr> <tr><td>3</td><td>3 = Moderately costly</td></tr> <tr><td>4</td><td>4 = Very costly</td></tr> <tr><td>5</td><td>5 = Extremely costly</td></tr> </table>                      | 1 | 1 =Not at all costly      | 2 | 2 = Somewhat costly     | 3 | 3 = Moderately costly     | 4 | 4 = Very costly     | 5 | 5 = Extremely costly     |
| 1  | 1 =Not at all costly                                                                                |                                                                                                                                                                                                                                                                                                                                   |                                                                                                                                                                                                                                                                                                                         |   |                           |   |                         |   |                           |   |                     |   |                          |
| 2  | 2 = Somewhat costly                                                                                 |                                                                                                                                                                                                                                                                                                                                   |                                                                                                                                                                                                                                                                                                                         |   |                           |   |                         |   |                           |   |                     |   |                          |
| 3  | 3 = Moderately costly                                                                               |                                                                                                                                                                                                                                                                                                                                   |                                                                                                                                                                                                                                                                                                                         |   |                           |   |                         |   |                           |   |                     |   |                          |
| 4  | 4 = Very costly                                                                                     |                                                                                                                                                                                                                                                                                                                                   |                                                                                                                                                                                                                                                                                                                         |   |                           |   |                         |   |                           |   |                     |   |                          |
| 5  | 5 = Extremely costly                                                                                |                                                                                                                                                                                                                                                                                                                                   |                                                                                                                                                                                                                                                                                                                         |   |                           |   |                         |   |                           |   |                     |   |                          |
| 43 | <p>section_1_action_7_yes_no</p>                                                                    | <p>Action 7: Work with educational institutions</p> <p>Q: Did your institution encourage educational institutions to train clinicians on the ABCDEF bundle?</p> <p>If action not used, mark "No" and go to next reflection question</p>                                                                                           | <p>yesno, Required</p> <table border="1"> <tr><td>1</td><td>Yes</td></tr> <tr><td>0</td><td>No</td></tr> </table> <p>Custom alignment: RH</p>                                                                                                                                                                           | 1 | Yes                       | 0 | No                      |   |                           |   |                     |   |                          |
| 1  | Yes                                                                                                 |                                                                                                                                                                                                                                                                                                                                   |                                                                                                                                                                                                                                                                                                                         |   |                           |   |                         |   |                           |   |                     |   |                          |
| 0  | No                                                                                                  |                                                                                                                                                                                                                                                                                                                                   |                                                                                                                                                                                                                                                                                                                         |   |                           |   |                         |   |                           |   |                     |   |                          |
| 44 | <p>section_1_action_7_text</p> <p>Show the field ONLY if:<br/>[section_1_action_7_yes_no] = '1'</p> | <p>When reflecting on your ICU's ABCDEF bundle implementation efforts:</p>                                                                                                                                                                                                                                                        | <p>descriptive</p>                                                                                                                                                                                                                                                                                                      |   |                           |   |                         |   |                           |   |                     |   |                          |

|    |                                                                                         |                                                                                                                                                                                                                                                                       |                                                                                                                                                                   |
|----|-----------------------------------------------------------------------------------------|-----------------------------------------------------------------------------------------------------------------------------------------------------------------------------------------------------------------------------------------------------------------------|-------------------------------------------------------------------------------------------------------------------------------------------------------------------|
| 45 | section_1_action_7_a<br>Show the field ONLY if:<br>[section_1_action_7_yes_no] = '1'    | A. How helpful was working with an educational institution for increasing bundle adoption?                                                                                                                                                                            | radio, Required<br>1 1 = Not at all helpful<br>2 2 = Somewhat helpful<br>3 3 = Moderately helpful<br>4 4 = Very helpful<br>5 5 = Extremely helpful                |
| 46 | section_1_action_7_b<br>Show the field ONLY if:<br>[section_1_action_7_yes_no] = '1'    | B. How acceptable was working with an educational institution for bundle-related training among ICU team members?                                                                                                                                                     | radio, Required<br>1 1 = Not at all acceptable<br>2 2 = Somewhat acceptable<br>3 3 = Moderately acceptable<br>4 4 = Very acceptable<br>5 5 = Extremely acceptable |
| 47 | section_1_action_7_c<br>Show the field ONLY if:<br>[section_1_action_7_yes_no] = '1'    | C. How feasible was it to work with an educational institution for bundle-related training?                                                                                                                                                                           | radio, Required<br>1 1 = Not at all feasible<br>2 2 = Somewhat feasible<br>3 3 = Moderately feasible<br>4 4 = Very feasible<br>5 5 = Extremely feasible           |
| 48 | section_1_action_7_d<br>Show the field ONLY if:<br>[section_1_action_7_yes_no] = '1'    | D. How costly (in terms of staff time, equipment, and other) was working with an educational institution for bundle-related training?                                                                                                                                 | radio, Required<br>1 1 =Not at all costly<br>2 2 = Somewhat costly<br>3 3 = Moderately costly<br>4 4 = Very costly<br>5 5 = Extremely costly                      |
| 49 | section_1_action_8_yes_no                                                               | Action 8: Provide ongoing consultation<br><br>Q: Did your institution provide ongoing consultation with one or more experts in the strategies used to support implementing the ABCDEF bundle?<br><br>If action not used, mark "No" and go to next reflection question | yesno, Required<br>1 Yes<br>0 No<br><br>Custom alignment: RH                                                                                                      |
| 50 | section_1_action_8_text<br>Show the field ONLY if:<br>[section_1_action_8_yes_no] = '1' | When reflecting on your ICU's ABCDEF bundle implementation efforts:                                                                                                                                                                                                   | descriptive                                                                                                                                                       |
| 51 | section_1_action_8_a<br>Show the field ONLY if:<br>[section_1_action_8_yes_no] = '1'    | A. How helpful was providing ongoing consultation for increasing bundle adoption?                                                                                                                                                                                     | radio, Required<br>1 1 = Not at all helpful<br>2 2 = Somewhat helpful<br>3 3 = Moderately helpful<br>4 4 = Very helpful<br>5 5 = Extremely helpful                |
| 52 | section_1_action_8_b<br>Show the field ONLY if:<br>[section_1_action_8_yes_no] = '1'    | B. How acceptable was providing ongoing consultation for bundle implementation among ICU team members?                                                                                                                                                                | radio, Required<br>1 1 = Not at all acceptable<br>2 2 = Somewhat acceptable<br>3 3 = Moderately acceptable<br>4 4 = Very acceptable<br>5 5 = Extremely acceptable |
| 53 | section_1_action_8_c<br>Show the field ONLY if:<br>[section_1_action_8_yes_no] = '1'    | C. How feasible was it to provide ongoing consultation for bundle implementation?                                                                                                                                                                                     | radio, Required<br>1 1 = Not at all feasible<br>2 2 = Somewhat feasible<br>3 3 = Moderately feasible<br>4 4 = Very feasible<br>5 5 = Extremely feasible           |



|    |                                                                                                       |                                                                                                                                                                                                                                                         |                                                                                                                                                                                                                                                                                                                         |   |                           |   |                         |   |                           |   |                     |   |                          |
|----|-------------------------------------------------------------------------------------------------------|---------------------------------------------------------------------------------------------------------------------------------------------------------------------------------------------------------------------------------------------------------|-------------------------------------------------------------------------------------------------------------------------------------------------------------------------------------------------------------------------------------------------------------------------------------------------------------------------|---|---------------------------|---|-------------------------|---|---------------------------|---|---------------------|---|--------------------------|
| 54 | <p>section_1_action_8_d</p> <p>Show the field ONLY if:<br/>[section_1_action_8_yes_no] = '1'</p>      | <p>D. How costly (in terms of staff time, equipment, and other) was providing ongoing consultation for bundle implementation?</p>                                                                                                                       | <p>radio, Required</p> <table border="1"> <tr><td>1</td><td>1 = Not at all costly</td></tr> <tr><td>2</td><td>2 = Somewhat costly</td></tr> <tr><td>3</td><td>3 = Moderately costly</td></tr> <tr><td>4</td><td>4 = Very costly</td></tr> <tr><td>5</td><td>5 = Extremely costly</td></tr> </table>                     | 1 | 1 = Not at all costly     | 2 | 2 = Somewhat costly     | 3 | 3 = Moderately costly     | 4 | 4 = Very costly     | 5 | 5 = Extremely costly     |
| 1  | 1 = Not at all costly                                                                                 |                                                                                                                                                                                                                                                         |                                                                                                                                                                                                                                                                                                                         |   |                           |   |                         |   |                           |   |                     |   |                          |
| 2  | 2 = Somewhat costly                                                                                   |                                                                                                                                                                                                                                                         |                                                                                                                                                                                                                                                                                                                         |   |                           |   |                         |   |                           |   |                     |   |                          |
| 3  | 3 = Moderately costly                                                                                 |                                                                                                                                                                                                                                                         |                                                                                                                                                                                                                                                                                                                         |   |                           |   |                         |   |                           |   |                     |   |                          |
| 4  | 4 = Very costly                                                                                       |                                                                                                                                                                                                                                                         |                                                                                                                                                                                                                                                                                                                         |   |                           |   |                         |   |                           |   |                     |   |                          |
| 5  | 5 = Extremely costly                                                                                  |                                                                                                                                                                                                                                                         |                                                                                                                                                                                                                                                                                                                         |   |                           |   |                         |   |                           |   |                     |   |                          |
| 55 | <p>section_1_action_9_yes_no</p>                                                                      | <p>Action 9: Use train-the-trainer strategies</p> <p>Q: Did your institution train designated clinicians or organizations to train others in the ABCDEF bundle?</p> <p>If action not used, mark "No" and go to next reflection question</p>             | <p>yesno, Required</p> <table border="1"> <tr><td>1</td><td>Yes</td></tr> <tr><td>0</td><td>No</td></tr> </table> <p>Custom alignment: RH</p>                                                                                                                                                                           | 1 | Yes                       | 0 | No                      |   |                           |   |                     |   |                          |
| 1  | Yes                                                                                                   |                                                                                                                                                                                                                                                         |                                                                                                                                                                                                                                                                                                                         |   |                           |   |                         |   |                           |   |                     |   |                          |
| 0  | No                                                                                                    |                                                                                                                                                                                                                                                         |                                                                                                                                                                                                                                                                                                                         |   |                           |   |                         |   |                           |   |                     |   |                          |
| 56 | <p>section_1_action_9_text</p> <p>Show the field ONLY if:<br/>[section_1_action_9_yes_no] = '1'</p>   | <p>When reflecting on your ICU's ABCDEF bundle implementation efforts:</p>                                                                                                                                                                              | <p>descriptive</p>                                                                                                                                                                                                                                                                                                      |   |                           |   |                         |   |                           |   |                     |   |                          |
| 57 | <p>section_1_action_9_a</p> <p>Show the field ONLY if:<br/>[section_1_action_9_yes_no] = '1'</p>      | <p>A. How helpful was using train-the-trainer strategies for increasing bundle adoption?</p>                                                                                                                                                            | <p>radio, Required</p> <table border="1"> <tr><td>1</td><td>1 = Not at all helpful</td></tr> <tr><td>2</td><td>2 = Somewhat helpful</td></tr> <tr><td>3</td><td>3 = Moderately helpful</td></tr> <tr><td>4</td><td>4 = Very helpful</td></tr> <tr><td>5</td><td>5 = Extremely helpful</td></tr> </table>                | 1 | 1 = Not at all helpful    | 2 | 2 = Somewhat helpful    | 3 | 3 = Moderately helpful    | 4 | 4 = Very helpful    | 5 | 5 = Extremely helpful    |
| 1  | 1 = Not at all helpful                                                                                |                                                                                                                                                                                                                                                         |                                                                                                                                                                                                                                                                                                                         |   |                           |   |                         |   |                           |   |                     |   |                          |
| 2  | 2 = Somewhat helpful                                                                                  |                                                                                                                                                                                                                                                         |                                                                                                                                                                                                                                                                                                                         |   |                           |   |                         |   |                           |   |                     |   |                          |
| 3  | 3 = Moderately helpful                                                                                |                                                                                                                                                                                                                                                         |                                                                                                                                                                                                                                                                                                                         |   |                           |   |                         |   |                           |   |                     |   |                          |
| 4  | 4 = Very helpful                                                                                      |                                                                                                                                                                                                                                                         |                                                                                                                                                                                                                                                                                                                         |   |                           |   |                         |   |                           |   |                     |   |                          |
| 5  | 5 = Extremely helpful                                                                                 |                                                                                                                                                                                                                                                         |                                                                                                                                                                                                                                                                                                                         |   |                           |   |                         |   |                           |   |                     |   |                          |
| 58 | <p>section_1_action_9_b</p> <p>Show the field ONLY if:<br/>[section_1_action_9_yes_no] = '1'</p>      | <p>B. How acceptable was using bundle-related train-the-trainer strategies among ICU team members?</p>                                                                                                                                                  | <p>radio, Required</p> <table border="1"> <tr><td>1</td><td>1 = Not at all acceptable</td></tr> <tr><td>2</td><td>2 = Somewhat acceptable</td></tr> <tr><td>3</td><td>3 = Moderately acceptable</td></tr> <tr><td>4</td><td>4 = Very acceptable</td></tr> <tr><td>5</td><td>5 = Extremely acceptable</td></tr> </table> | 1 | 1 = Not at all acceptable | 2 | 2 = Somewhat acceptable | 3 | 3 = Moderately acceptable | 4 | 4 = Very acceptable | 5 | 5 = Extremely acceptable |
| 1  | 1 = Not at all acceptable                                                                             |                                                                                                                                                                                                                                                         |                                                                                                                                                                                                                                                                                                                         |   |                           |   |                         |   |                           |   |                     |   |                          |
| 2  | 2 = Somewhat acceptable                                                                               |                                                                                                                                                                                                                                                         |                                                                                                                                                                                                                                                                                                                         |   |                           |   |                         |   |                           |   |                     |   |                          |
| 3  | 3 = Moderately acceptable                                                                             |                                                                                                                                                                                                                                                         |                                                                                                                                                                                                                                                                                                                         |   |                           |   |                         |   |                           |   |                     |   |                          |
| 4  | 4 = Very acceptable                                                                                   |                                                                                                                                                                                                                                                         |                                                                                                                                                                                                                                                                                                                         |   |                           |   |                         |   |                           |   |                     |   |                          |
| 5  | 5 = Extremely acceptable                                                                              |                                                                                                                                                                                                                                                         |                                                                                                                                                                                                                                                                                                                         |   |                           |   |                         |   |                           |   |                     |   |                          |
| 59 | <p>section_1_action_9_c</p> <p>Show the field ONLY if:<br/>[section_1_action_9_yes_no] = '1'</p>      | <p>C. How feasible was it to use bundle-related train-the-trainer strategies?</p>                                                                                                                                                                       | <p>radio, Required</p> <table border="1"> <tr><td>1</td><td>1 = Not at all feasible</td></tr> <tr><td>2</td><td>2 = Somewhat feasible</td></tr> <tr><td>3</td><td>3 = Moderately feasible</td></tr> <tr><td>4</td><td>4 = Very feasible</td></tr> <tr><td>5</td><td>5 = Extremely feasible</td></tr> </table>           | 1 | 1 = Not at all feasible   | 2 | 2 = Somewhat feasible   | 3 | 3 = Moderately feasible   | 4 | 4 = Very feasible   | 5 | 5 = Extremely feasible   |
| 1  | 1 = Not at all feasible                                                                               |                                                                                                                                                                                                                                                         |                                                                                                                                                                                                                                                                                                                         |   |                           |   |                         |   |                           |   |                     |   |                          |
| 2  | 2 = Somewhat feasible                                                                                 |                                                                                                                                                                                                                                                         |                                                                                                                                                                                                                                                                                                                         |   |                           |   |                         |   |                           |   |                     |   |                          |
| 3  | 3 = Moderately feasible                                                                               |                                                                                                                                                                                                                                                         |                                                                                                                                                                                                                                                                                                                         |   |                           |   |                         |   |                           |   |                     |   |                          |
| 4  | 4 = Very feasible                                                                                     |                                                                                                                                                                                                                                                         |                                                                                                                                                                                                                                                                                                                         |   |                           |   |                         |   |                           |   |                     |   |                          |
| 5  | 5 = Extremely feasible                                                                                |                                                                                                                                                                                                                                                         |                                                                                                                                                                                                                                                                                                                         |   |                           |   |                         |   |                           |   |                     |   |                          |
| 60 | <p>section_1_action_9_d</p> <p>Show the field ONLY if:<br/>[section_1_action_9_yes_no] = '1'</p>      | <p>D. How costly (in terms of staff time, equipment, and other) was using bundle-related train-the-trainer strategies?</p>                                                                                                                              | <p>radio, Required</p> <table border="1"> <tr><td>1</td><td>1 =Not at all costly</td></tr> <tr><td>2</td><td>2 = Somewhat costly</td></tr> <tr><td>3</td><td>3 = Moderately costly</td></tr> <tr><td>4</td><td>4 = Very costly</td></tr> <tr><td>5</td><td>5 = Extremely costly</td></tr> </table>                      | 1 | 1 =Not at all costly      | 2 | 2 = Somewhat costly     | 3 | 3 = Moderately costly     | 4 | 4 = Very costly     | 5 | 5 = Extremely costly     |
| 1  | 1 =Not at all costly                                                                                  |                                                                                                                                                                                                                                                         |                                                                                                                                                                                                                                                                                                                         |   |                           |   |                         |   |                           |   |                     |   |                          |
| 2  | 2 = Somewhat costly                                                                                   |                                                                                                                                                                                                                                                         |                                                                                                                                                                                                                                                                                                                         |   |                           |   |                         |   |                           |   |                     |   |                          |
| 3  | 3 = Moderately costly                                                                                 |                                                                                                                                                                                                                                                         |                                                                                                                                                                                                                                                                                                                         |   |                           |   |                         |   |                           |   |                     |   |                          |
| 4  | 4 = Very costly                                                                                       |                                                                                                                                                                                                                                                         |                                                                                                                                                                                                                                                                                                                         |   |                           |   |                         |   |                           |   |                     |   |                          |
| 5  | 5 = Extremely costly                                                                                  |                                                                                                                                                                                                                                                         |                                                                                                                                                                                                                                                                                                                         |   |                           |   |                         |   |                           |   |                     |   |                          |
| 61 | <p>section_1_action_10_yes_no</p>                                                                     | <p>Action 10: Conduct educational outreach visits</p> <p>Q: Did your institution have a trained person meet with providers in their practice settings to educate providers about the ABCDEF bundle with the intent of changing providers' practice?</p> | <p>yesno, Required</p> <table border="1"> <tr><td>1</td><td>Yes</td></tr> <tr><td>0</td><td>No</td></tr> </table> <p>Custom alignment: RH</p>                                                                                                                                                                           | 1 | Yes                       | 0 | No                      |   |                           |   |                     |   |                          |
| 1  | Yes                                                                                                   |                                                                                                                                                                                                                                                         |                                                                                                                                                                                                                                                                                                                         |   |                           |   |                         |   |                           |   |                     |   |                          |
| 0  | No                                                                                                    |                                                                                                                                                                                                                                                         |                                                                                                                                                                                                                                                                                                                         |   |                           |   |                         |   |                           |   |                     |   |                          |
| 62 | <p>section_1_action_10_text</p> <p>Show the field ONLY if:<br/>[section_1_action_10_yes_no] = '1'</p> | <p>When reflecting on your ICU's ABCDEF bundle implementation efforts:</p>                                                                                                                                                                              | <p>descriptive</p>                                                                                                                                                                                                                                                                                                      |   |                           |   |                         |   |                           |   |                     |   |                          |
| 63 | <p>section_1_action_10_a</p> <p>Show the field ONLY if:<br/>[section_1_action_10_yes_no] = '1'</p>    | <p>A. How helpful was conducting educational outreach visits for increasing bundle adoption?</p>                                                                                                                                                        | <p>radio, Required</p> <table border="1"> <tr><td>1</td><td>1 = Not at all helpful</td></tr> <tr><td>2</td><td>2 = Somewhat helpful</td></tr> <tr><td>3</td><td>3 = Moderately helpful</td></tr> <tr><td>4</td><td>4 = Very helpful</td></tr> <tr><td>5</td><td>5 = Extremely helpful</td></tr> </table>                | 1 | 1 = Not at all helpful    | 2 | 2 = Somewhat helpful    | 3 | 3 = Moderately helpful    | 4 | 4 = Very helpful    | 5 | 5 = Extremely helpful    |
| 1  | 1 = Not at all helpful                                                                                |                                                                                                                                                                                                                                                         |                                                                                                                                                                                                                                                                                                                         |   |                           |   |                         |   |                           |   |                     |   |                          |
| 2  | 2 = Somewhat helpful                                                                                  |                                                                                                                                                                                                                                                         |                                                                                                                                                                                                                                                                                                                         |   |                           |   |                         |   |                           |   |                     |   |                          |
| 3  | 3 = Moderately helpful                                                                                |                                                                                                                                                                                                                                                         |                                                                                                                                                                                                                                                                                                                         |   |                           |   |                         |   |                           |   |                     |   |                          |
| 4  | 4 = Very helpful                                                                                      |                                                                                                                                                                                                                                                         |                                                                                                                                                                                                                                                                                                                         |   |                           |   |                         |   |                           |   |                     |   |                          |
| 5  | 5 = Extremely helpful                                                                                 |                                                                                                                                                                                                                                                         |                                                                                                                                                                                                                                                                                                                         |   |                           |   |                         |   |                           |   |                     |   |                          |

|    |                                                                                           |                                                                                                                                                                                                                                                      |                                                                                                                                                                                                                                                                                                                     |   |                           |   |                         |   |                           |   |                     |   |                          |
|----|-------------------------------------------------------------------------------------------|------------------------------------------------------------------------------------------------------------------------------------------------------------------------------------------------------------------------------------------------------|---------------------------------------------------------------------------------------------------------------------------------------------------------------------------------------------------------------------------------------------------------------------------------------------------------------------|---|---------------------------|---|-------------------------|---|---------------------------|---|---------------------|---|--------------------------|
| 64 | section_1_action_10_b<br>Show the field ONLY if:<br>[section_1_action_10_yes_no] = '1'    | B. How acceptable was conducting bundle-related educational outreach visits among ICU team members?                                                                                                                                                  | radio, Required<br><table border="1"> <tr><td>1</td><td>1 = Not at all acceptable</td></tr> <tr><td>2</td><td>2 = Somewhat acceptable</td></tr> <tr><td>3</td><td>3 = Moderately acceptable</td></tr> <tr><td>4</td><td>4 = Very acceptable</td></tr> <tr><td>5</td><td>5 = Extremely acceptable</td></tr> </table> | 1 | 1 = Not at all acceptable | 2 | 2 = Somewhat acceptable | 3 | 3 = Moderately acceptable | 4 | 4 = Very acceptable | 5 | 5 = Extremely acceptable |
| 1  | 1 = Not at all acceptable                                                                 |                                                                                                                                                                                                                                                      |                                                                                                                                                                                                                                                                                                                     |   |                           |   |                         |   |                           |   |                     |   |                          |
| 2  | 2 = Somewhat acceptable                                                                   |                                                                                                                                                                                                                                                      |                                                                                                                                                                                                                                                                                                                     |   |                           |   |                         |   |                           |   |                     |   |                          |
| 3  | 3 = Moderately acceptable                                                                 |                                                                                                                                                                                                                                                      |                                                                                                                                                                                                                                                                                                                     |   |                           |   |                         |   |                           |   |                     |   |                          |
| 4  | 4 = Very acceptable                                                                       |                                                                                                                                                                                                                                                      |                                                                                                                                                                                                                                                                                                                     |   |                           |   |                         |   |                           |   |                     |   |                          |
| 5  | 5 = Extremely acceptable                                                                  |                                                                                                                                                                                                                                                      |                                                                                                                                                                                                                                                                                                                     |   |                           |   |                         |   |                           |   |                     |   |                          |
| 65 | section_1_action_10_c<br>Show the field ONLY if:<br>[section_1_action_10_yes_no] = '1'    | C. How feasible was it to conduct bundle-related educational outreach visits?                                                                                                                                                                        | radio, Required<br><table border="1"> <tr><td>1</td><td>1 = Not at all feasible</td></tr> <tr><td>2</td><td>2 = Somewhat feasible</td></tr> <tr><td>3</td><td>3 = Moderately feasible</td></tr> <tr><td>4</td><td>4 = Very feasible</td></tr> <tr><td>5</td><td>5 = Extremely feasible</td></tr> </table>           | 1 | 1 = Not at all feasible   | 2 | 2 = Somewhat feasible   | 3 | 3 = Moderately feasible   | 4 | 4 = Very feasible   | 5 | 5 = Extremely feasible   |
| 1  | 1 = Not at all feasible                                                                   |                                                                                                                                                                                                                                                      |                                                                                                                                                                                                                                                                                                                     |   |                           |   |                         |   |                           |   |                     |   |                          |
| 2  | 2 = Somewhat feasible                                                                     |                                                                                                                                                                                                                                                      |                                                                                                                                                                                                                                                                                                                     |   |                           |   |                         |   |                           |   |                     |   |                          |
| 3  | 3 = Moderately feasible                                                                   |                                                                                                                                                                                                                                                      |                                                                                                                                                                                                                                                                                                                     |   |                           |   |                         |   |                           |   |                     |   |                          |
| 4  | 4 = Very feasible                                                                         |                                                                                                                                                                                                                                                      |                                                                                                                                                                                                                                                                                                                     |   |                           |   |                         |   |                           |   |                     |   |                          |
| 5  | 5 = Extremely feasible                                                                    |                                                                                                                                                                                                                                                      |                                                                                                                                                                                                                                                                                                                     |   |                           |   |                         |   |                           |   |                     |   |                          |
| 66 | section_1_action_10_d<br>Show the field ONLY if:<br>[section_1_action_10_yes_no] = '1'    | D. How costly (in terms of staff time, equipment, and other) was conducting bundle-related educational outreach visits?                                                                                                                              | radio, Required<br><table border="1"> <tr><td>1</td><td>1 =Not at all costly</td></tr> <tr><td>2</td><td>2 = Somewhat costly</td></tr> <tr><td>3</td><td>3 = Moderately costly</td></tr> <tr><td>4</td><td>4 = Very costly</td></tr> <tr><td>5</td><td>5 = Extremely costly</td></tr> </table>                      | 1 | 1 =Not at all costly      | 2 | 2 = Somewhat costly     | 3 | 3 = Moderately costly     | 4 | 4 = Very costly     | 5 | 5 = Extremely costly     |
| 1  | 1 =Not at all costly                                                                      |                                                                                                                                                                                                                                                      |                                                                                                                                                                                                                                                                                                                     |   |                           |   |                         |   |                           |   |                     |   |                          |
| 2  | 2 = Somewhat costly                                                                       |                                                                                                                                                                                                                                                      |                                                                                                                                                                                                                                                                                                                     |   |                           |   |                         |   |                           |   |                     |   |                          |
| 3  | 3 = Moderately costly                                                                     |                                                                                                                                                                                                                                                      |                                                                                                                                                                                                                                                                                                                     |   |                           |   |                         |   |                           |   |                     |   |                          |
| 4  | 4 = Very costly                                                                           |                                                                                                                                                                                                                                                      |                                                                                                                                                                                                                                                                                                                     |   |                           |   |                         |   |                           |   |                     |   |                          |
| 5  | 5 = Extremely costly                                                                      |                                                                                                                                                                                                                                                      |                                                                                                                                                                                                                                                                                                                     |   |                           |   |                         |   |                           |   |                     |   |                          |
| 67 | section_1_action_11_yes_no                                                                | Action 11: Shadow other experts<br><br>Q: Did your institution provide ways for key individuals to directly observe experienced people engage with or use the ABCDEF bundle?<br><br>If action not used, mark "No" and go to next reflection question | yesno, Required<br><table border="1"> <tr><td>1</td><td>Yes</td></tr> <tr><td>0</td><td>No</td></tr> </table> Custom alignment: RH                                                                                                                                                                                  | 1 | Yes                       | 0 | No                      |   |                           |   |                     |   |                          |
| 1  | Yes                                                                                       |                                                                                                                                                                                                                                                      |                                                                                                                                                                                                                                                                                                                     |   |                           |   |                         |   |                           |   |                     |   |                          |
| 0  | No                                                                                        |                                                                                                                                                                                                                                                      |                                                                                                                                                                                                                                                                                                                     |   |                           |   |                         |   |                           |   |                     |   |                          |
| 68 | section_1_action_11_text<br>Show the field ONLY if:<br>[section_1_action_11_yes_no] = '1' | When reflecting on your ICU's ABCDEF bundle implementation efforts:                                                                                                                                                                                  | descriptive                                                                                                                                                                                                                                                                                                         |   |                           |   |                         |   |                           |   |                     |   |                          |
| 69 | section_1_action_11_a<br>Show the field ONLY if:<br>[section_1_action_11_yes_no] = '1'    | A. How helpful was shadowing other experts for increasing bundle adoption?                                                                                                                                                                           | radio, Required<br><table border="1"> <tr><td>1</td><td>1 = Not at all helpful</td></tr> <tr><td>2</td><td>2 = Somewhat helpful</td></tr> <tr><td>3</td><td>3 = Moderately helpful</td></tr> <tr><td>4</td><td>4 = Very helpful</td></tr> <tr><td>5</td><td>5 = Extremely helpful</td></tr> </table>                | 1 | 1 = Not at all helpful    | 2 | 2 = Somewhat helpful    | 3 | 3 = Moderately helpful    | 4 | 4 = Very helpful    | 5 | 5 = Extremely helpful    |
| 1  | 1 = Not at all helpful                                                                    |                                                                                                                                                                                                                                                      |                                                                                                                                                                                                                                                                                                                     |   |                           |   |                         |   |                           |   |                     |   |                          |
| 2  | 2 = Somewhat helpful                                                                      |                                                                                                                                                                                                                                                      |                                                                                                                                                                                                                                                                                                                     |   |                           |   |                         |   |                           |   |                     |   |                          |
| 3  | 3 = Moderately helpful                                                                    |                                                                                                                                                                                                                                                      |                                                                                                                                                                                                                                                                                                                     |   |                           |   |                         |   |                           |   |                     |   |                          |
| 4  | 4 = Very helpful                                                                          |                                                                                                                                                                                                                                                      |                                                                                                                                                                                                                                                                                                                     |   |                           |   |                         |   |                           |   |                     |   |                          |
| 5  | 5 = Extremely helpful                                                                     |                                                                                                                                                                                                                                                      |                                                                                                                                                                                                                                                                                                                     |   |                           |   |                         |   |                           |   |                     |   |                          |
| 70 | section_1_action_11_b<br>Show the field ONLY if:<br>[section_1_action_11_yes_no] = '1'    | B. How acceptable was shadowing other bundle-related experts among ICU team members?                                                                                                                                                                 | radio, Required<br><table border="1"> <tr><td>1</td><td>1 = Not at all acceptable</td></tr> <tr><td>2</td><td>2 = Somewhat acceptable</td></tr> <tr><td>3</td><td>3 = Moderately acceptable</td></tr> <tr><td>4</td><td>4 = Very acceptable</td></tr> <tr><td>5</td><td>5 = Extremely acceptable</td></tr> </table> | 1 | 1 = Not at all acceptable | 2 | 2 = Somewhat acceptable | 3 | 3 = Moderately acceptable | 4 | 4 = Very acceptable | 5 | 5 = Extremely acceptable |
| 1  | 1 = Not at all acceptable                                                                 |                                                                                                                                                                                                                                                      |                                                                                                                                                                                                                                                                                                                     |   |                           |   |                         |   |                           |   |                     |   |                          |
| 2  | 2 = Somewhat acceptable                                                                   |                                                                                                                                                                                                                                                      |                                                                                                                                                                                                                                                                                                                     |   |                           |   |                         |   |                           |   |                     |   |                          |
| 3  | 3 = Moderately acceptable                                                                 |                                                                                                                                                                                                                                                      |                                                                                                                                                                                                                                                                                                                     |   |                           |   |                         |   |                           |   |                     |   |                          |
| 4  | 4 = Very acceptable                                                                       |                                                                                                                                                                                                                                                      |                                                                                                                                                                                                                                                                                                                     |   |                           |   |                         |   |                           |   |                     |   |                          |
| 5  | 5 = Extremely acceptable                                                                  |                                                                                                                                                                                                                                                      |                                                                                                                                                                                                                                                                                                                     |   |                           |   |                         |   |                           |   |                     |   |                          |
| 71 | section_1_action_11_c<br>Show the field ONLY if:<br>[section_1_action_11_yes_no] = '1'    | C. How feasible was it to shadow other bundle-related experts?                                                                                                                                                                                       | radio, Required<br><table border="1"> <tr><td>1</td><td>1 = Not at all feasible</td></tr> <tr><td>2</td><td>2 = Somewhat feasible</td></tr> <tr><td>3</td><td>3 = Moderately feasible</td></tr> <tr><td>4</td><td>4 = Very feasible</td></tr> <tr><td>5</td><td>5 = Extremely feasible</td></tr> </table>           | 1 | 1 = Not at all feasible   | 2 | 2 = Somewhat feasible   | 3 | 3 = Moderately feasible   | 4 | 4 = Very feasible   | 5 | 5 = Extremely feasible   |
| 1  | 1 = Not at all feasible                                                                   |                                                                                                                                                                                                                                                      |                                                                                                                                                                                                                                                                                                                     |   |                           |   |                         |   |                           |   |                     |   |                          |
| 2  | 2 = Somewhat feasible                                                                     |                                                                                                                                                                                                                                                      |                                                                                                                                                                                                                                                                                                                     |   |                           |   |                         |   |                           |   |                     |   |                          |
| 3  | 3 = Moderately feasible                                                                   |                                                                                                                                                                                                                                                      |                                                                                                                                                                                                                                                                                                                     |   |                           |   |                         |   |                           |   |                     |   |                          |
| 4  | 4 = Very feasible                                                                         |                                                                                                                                                                                                                                                      |                                                                                                                                                                                                                                                                                                                     |   |                           |   |                         |   |                           |   |                     |   |                          |
| 5  | 5 = Extremely feasible                                                                    |                                                                                                                                                                                                                                                      |                                                                                                                                                                                                                                                                                                                     |   |                           |   |                         |   |                           |   |                     |   |                          |
| 72 | section_1_action_11_d<br>Show the field ONLY if:<br>[section_1_action_11_yes_no] = '1'    | D. How costly (in terms of staff time, equipment, and other) was shadowing other bundle-related experts?                                                                                                                                             | radio, Required<br><table border="1"> <tr><td>1</td><td>1 =Not at all costly</td></tr> <tr><td>2</td><td>2 = Somewhat costly</td></tr> <tr><td>3</td><td>3 = Moderately costly</td></tr> <tr><td>4</td><td>4 = Very costly</td></tr> <tr><td>5</td><td>5 = Extremely costly</td></tr> </table>                      | 1 | 1 =Not at all costly      | 2 | 2 = Somewhat costly     | 3 | 3 = Moderately costly     | 4 | 4 = Very costly     | 5 | 5 = Extremely costly     |
| 1  | 1 =Not at all costly                                                                      |                                                                                                                                                                                                                                                      |                                                                                                                                                                                                                                                                                                                     |   |                           |   |                         |   |                           |   |                     |   |                          |
| 2  | 2 = Somewhat costly                                                                       |                                                                                                                                                                                                                                                      |                                                                                                                                                                                                                                                                                                                     |   |                           |   |                         |   |                           |   |                     |   |                          |
| 3  | 3 = Moderately costly                                                                     |                                                                                                                                                                                                                                                      |                                                                                                                                                                                                                                                                                                                     |   |                           |   |                         |   |                           |   |                     |   |                          |
| 4  | 4 = Very costly                                                                           |                                                                                                                                                                                                                                                      |                                                                                                                                                                                                                                                                                                                     |   |                           |   |                         |   |                           |   |                     |   |                          |
| 5  | 5 = Extremely costly                                                                      |                                                                                                                                                                                                                                                      |                                                                                                                                                                                                                                                                                                                     |   |                           |   |                         |   |                           |   |                     |   |                          |
| 73 | section_2_text                                                                            | Section Header:<br>SECTION 2: DEVELOP STAKEHOLDER INTERRELATIONSHIPS (17 QUESTIONS)                                                                                                                                                                  | descriptive                                                                                                                                                                                                                                                                                                         |   |                           |   |                         |   |                           |   |                     |   |                          |

|    |                                                                                         |                                                                                                                                                                                                                                                                                                                                                   |                                                                                                                                                                                                                                                                                                                                    |   |                           |   |                         |   |                           |   |                     |   |                          |
|----|-----------------------------------------------------------------------------------------|---------------------------------------------------------------------------------------------------------------------------------------------------------------------------------------------------------------------------------------------------------------------------------------------------------------------------------------------------|------------------------------------------------------------------------------------------------------------------------------------------------------------------------------------------------------------------------------------------------------------------------------------------------------------------------------------|---|---------------------------|---|-------------------------|---|---------------------------|---|---------------------|---|--------------------------|
| 74 | section_2_action_1_yes_no                                                               | Action 1: Use an advisory board and/or workgroup<br>Q: Did your institution create and engage a formal group of multiple kinds of stakeholders to provide input and advice on ABCDEF bundle implementation efforts and to elicit recommendations for bundle improvements?<br><br>If action not used, mark "No" and go to next reflection question | yesno, Required<br><table border="1"> <tr> <td>1</td> <td>Yes</td> </tr> <tr> <td>0</td> <td>No</td> </tr> </table><br>Custom alignment: RH                                                                                                                                                                                        | 1 | Yes                       | 0 | No                      |   |                           |   |                     |   |                          |
| 1  | Yes                                                                                     |                                                                                                                                                                                                                                                                                                                                                   |                                                                                                                                                                                                                                                                                                                                    |   |                           |   |                         |   |                           |   |                     |   |                          |
| 0  | No                                                                                      |                                                                                                                                                                                                                                                                                                                                                   |                                                                                                                                                                                                                                                                                                                                    |   |                           |   |                         |   |                           |   |                     |   |                          |
| 75 | section_2_action_1_text<br>Show the field ONLY if:<br>[section_2_action_1_yes_no] = '1' | When reflecting on your ICU's ABCDEF bundle implementation efforts:                                                                                                                                                                                                                                                                               | descriptive                                                                                                                                                                                                                                                                                                                        |   |                           |   |                         |   |                           |   |                     |   |                          |
| 76 | section_2_action_1_a<br>Show the field ONLY if:<br>[section_2_action_1_yes_no] = '1'    | A. How helpful was using an advisory board and/or workgroup for increasing bundle adoption?                                                                                                                                                                                                                                                       | radio, Required<br><table border="1"> <tr> <td>1</td> <td>1 = Not at all helpful</td> </tr> <tr> <td>2</td> <td>2 = Somewhat helpful</td> </tr> <tr> <td>3</td> <td>3 = Moderately helpful</td> </tr> <tr> <td>4</td> <td>4 = Very helpful</td> </tr> <tr> <td>5</td> <td>5 = Extremely helpful</td> </tr> </table>                | 1 | 1 = Not at all helpful    | 2 | 2 = Somewhat helpful    | 3 | 3 = Moderately helpful    | 4 | 4 = Very helpful    | 5 | 5 = Extremely helpful    |
| 1  | 1 = Not at all helpful                                                                  |                                                                                                                                                                                                                                                                                                                                                   |                                                                                                                                                                                                                                                                                                                                    |   |                           |   |                         |   |                           |   |                     |   |                          |
| 2  | 2 = Somewhat helpful                                                                    |                                                                                                                                                                                                                                                                                                                                                   |                                                                                                                                                                                                                                                                                                                                    |   |                           |   |                         |   |                           |   |                     |   |                          |
| 3  | 3 = Moderately helpful                                                                  |                                                                                                                                                                                                                                                                                                                                                   |                                                                                                                                                                                                                                                                                                                                    |   |                           |   |                         |   |                           |   |                     |   |                          |
| 4  | 4 = Very helpful                                                                        |                                                                                                                                                                                                                                                                                                                                                   |                                                                                                                                                                                                                                                                                                                                    |   |                           |   |                         |   |                           |   |                     |   |                          |
| 5  | 5 = Extremely helpful                                                                   |                                                                                                                                                                                                                                                                                                                                                   |                                                                                                                                                                                                                                                                                                                                    |   |                           |   |                         |   |                           |   |                     |   |                          |
| 77 | section_2_action_1_b<br>Show the field ONLY if:<br>[section_2_action_1_yes_no] = '1'    | B. How acceptable was using a bundle-related advisory board or workgroup among ICU team members?                                                                                                                                                                                                                                                  | radio, Required<br><table border="1"> <tr> <td>1</td> <td>1 = Not at all acceptable</td> </tr> <tr> <td>2</td> <td>2 = Somewhat acceptable</td> </tr> <tr> <td>3</td> <td>3 = Moderately acceptable</td> </tr> <tr> <td>4</td> <td>4 = Very acceptable</td> </tr> <tr> <td>5</td> <td>5 = Extremely acceptable</td> </tr> </table> | 1 | 1 = Not at all acceptable | 2 | 2 = Somewhat acceptable | 3 | 3 = Moderately acceptable | 4 | 4 = Very acceptable | 5 | 5 = Extremely acceptable |
| 1  | 1 = Not at all acceptable                                                               |                                                                                                                                                                                                                                                                                                                                                   |                                                                                                                                                                                                                                                                                                                                    |   |                           |   |                         |   |                           |   |                     |   |                          |
| 2  | 2 = Somewhat acceptable                                                                 |                                                                                                                                                                                                                                                                                                                                                   |                                                                                                                                                                                                                                                                                                                                    |   |                           |   |                         |   |                           |   |                     |   |                          |
| 3  | 3 = Moderately acceptable                                                               |                                                                                                                                                                                                                                                                                                                                                   |                                                                                                                                                                                                                                                                                                                                    |   |                           |   |                         |   |                           |   |                     |   |                          |
| 4  | 4 = Very acceptable                                                                     |                                                                                                                                                                                                                                                                                                                                                   |                                                                                                                                                                                                                                                                                                                                    |   |                           |   |                         |   |                           |   |                     |   |                          |
| 5  | 5 = Extremely acceptable                                                                |                                                                                                                                                                                                                                                                                                                                                   |                                                                                                                                                                                                                                                                                                                                    |   |                           |   |                         |   |                           |   |                     |   |                          |
| 78 | section_2_action_1_c<br>Show the field ONLY if:<br>[section_2_action_1_yes_no] = '1'    | C. How feasible was it to use a bundle-related advisory board and/or workgroup?                                                                                                                                                                                                                                                                   | radio, Required<br><table border="1"> <tr> <td>1</td> <td>1 = Not at all feasible</td> </tr> <tr> <td>2</td> <td>2 = Somewhat feasible</td> </tr> <tr> <td>3</td> <td>3 = Moderately feasible</td> </tr> <tr> <td>4</td> <td>4 = Very feasible</td> </tr> <tr> <td>5</td> <td>5 = Extremely feasible</td> </tr> </table>           | 1 | 1 = Not at all feasible   | 2 | 2 = Somewhat feasible   | 3 | 3 = Moderately feasible   | 4 | 4 = Very feasible   | 5 | 5 = Extremely feasible   |
| 1  | 1 = Not at all feasible                                                                 |                                                                                                                                                                                                                                                                                                                                                   |                                                                                                                                                                                                                                                                                                                                    |   |                           |   |                         |   |                           |   |                     |   |                          |
| 2  | 2 = Somewhat feasible                                                                   |                                                                                                                                                                                                                                                                                                                                                   |                                                                                                                                                                                                                                                                                                                                    |   |                           |   |                         |   |                           |   |                     |   |                          |
| 3  | 3 = Moderately feasible                                                                 |                                                                                                                                                                                                                                                                                                                                                   |                                                                                                                                                                                                                                                                                                                                    |   |                           |   |                         |   |                           |   |                     |   |                          |
| 4  | 4 = Very feasible                                                                       |                                                                                                                                                                                                                                                                                                                                                   |                                                                                                                                                                                                                                                                                                                                    |   |                           |   |                         |   |                           |   |                     |   |                          |
| 5  | 5 = Extremely feasible                                                                  |                                                                                                                                                                                                                                                                                                                                                   |                                                                                                                                                                                                                                                                                                                                    |   |                           |   |                         |   |                           |   |                     |   |                          |
| 79 | section_2_action_1_d<br>Show the field ONLY if:<br>[section_2_action_1_yes_no] = '1'    | D. How costly (in terms of staff time, equipment, and other) was using a bundle-related advisory board or workgroup?                                                                                                                                                                                                                              | radio, Required<br><table border="1"> <tr> <td>1</td> <td>1 = Not at all costly</td> </tr> <tr> <td>2</td> <td>2 = Somewhat costly</td> </tr> <tr> <td>3</td> <td>3 = Moderately costly</td> </tr> <tr> <td>4</td> <td>4 = Very costly</td> </tr> <tr> <td>5</td> <td>5 = Extremely costly</td> </tr> </table>                     | 1 | 1 = Not at all costly     | 2 | 2 = Somewhat costly     | 3 | 3 = Moderately costly     | 4 | 4 = Very costly     | 5 | 5 = Extremely costly     |
| 1  | 1 = Not at all costly                                                                   |                                                                                                                                                                                                                                                                                                                                                   |                                                                                                                                                                                                                                                                                                                                    |   |                           |   |                         |   |                           |   |                     |   |                          |
| 2  | 2 = Somewhat costly                                                                     |                                                                                                                                                                                                                                                                                                                                                   |                                                                                                                                                                                                                                                                                                                                    |   |                           |   |                         |   |                           |   |                     |   |                          |
| 3  | 3 = Moderately costly                                                                   |                                                                                                                                                                                                                                                                                                                                                   |                                                                                                                                                                                                                                                                                                                                    |   |                           |   |                         |   |                           |   |                     |   |                          |
| 4  | 4 = Very costly                                                                         |                                                                                                                                                                                                                                                                                                                                                   |                                                                                                                                                                                                                                                                                                                                    |   |                           |   |                         |   |                           |   |                     |   |                          |
| 5  | 5 = Extremely costly                                                                    |                                                                                                                                                                                                                                                                                                                                                   |                                                                                                                                                                                                                                                                                                                                    |   |                           |   |                         |   |                           |   |                     |   |                          |
| 80 | section_2_action_2_yes_no                                                               | Action 2: Use an implementation advisor<br>Q: Did your institution seek guidance from experts in implementation?<br><br>If action not used, mark "No" and go to next reflection question                                                                                                                                                          | yesno, Required<br><table border="1"> <tr> <td>1</td> <td>Yes</td> </tr> <tr> <td>0</td> <td>No</td> </tr> </table><br>Custom alignment: RH                                                                                                                                                                                        | 1 | Yes                       | 0 | No                      |   |                           |   |                     |   |                          |
| 1  | Yes                                                                                     |                                                                                                                                                                                                                                                                                                                                                   |                                                                                                                                                                                                                                                                                                                                    |   |                           |   |                         |   |                           |   |                     |   |                          |
| 0  | No                                                                                      |                                                                                                                                                                                                                                                                                                                                                   |                                                                                                                                                                                                                                                                                                                                    |   |                           |   |                         |   |                           |   |                     |   |                          |
| 81 | section_2_action_2_text<br>Show the field ONLY if:<br>[section_2_action_2_yes_no] = '1' | When reflecting on your ICU's ABCDEF bundle implementation efforts:                                                                                                                                                                                                                                                                               | descriptive                                                                                                                                                                                                                                                                                                                        |   |                           |   |                         |   |                           |   |                     |   |                          |
| 82 | section_2_action_2_a<br>Show the field ONLY if:<br>[section_2_action_2_yes_no] = '1'    | A. How helpful was using an implementation advisor for increasing bundle adoption?                                                                                                                                                                                                                                                                | radio, Required<br><table border="1"> <tr> <td>1</td> <td>1 = Not at all helpful</td> </tr> <tr> <td>2</td> <td>2 = Somewhat helpful</td> </tr> <tr> <td>3</td> <td>3 = Moderately helpful</td> </tr> <tr> <td>4</td> <td>4 = Very helpful</td> </tr> <tr> <td>5</td> <td>5 = Extremely helpful</td> </tr> </table>                | 1 | 1 = Not at all helpful    | 2 | 2 = Somewhat helpful    | 3 | 3 = Moderately helpful    | 4 | 4 = Very helpful    | 5 | 5 = Extremely helpful    |
| 1  | 1 = Not at all helpful                                                                  |                                                                                                                                                                                                                                                                                                                                                   |                                                                                                                                                                                                                                                                                                                                    |   |                           |   |                         |   |                           |   |                     |   |                          |
| 2  | 2 = Somewhat helpful                                                                    |                                                                                                                                                                                                                                                                                                                                                   |                                                                                                                                                                                                                                                                                                                                    |   |                           |   |                         |   |                           |   |                     |   |                          |
| 3  | 3 = Moderately helpful                                                                  |                                                                                                                                                                                                                                                                                                                                                   |                                                                                                                                                                                                                                                                                                                                    |   |                           |   |                         |   |                           |   |                     |   |                          |
| 4  | 4 = Very helpful                                                                        |                                                                                                                                                                                                                                                                                                                                                   |                                                                                                                                                                                                                                                                                                                                    |   |                           |   |                         |   |                           |   |                     |   |                          |
| 5  | 5 = Extremely helpful                                                                   |                                                                                                                                                                                                                                                                                                                                                   |                                                                                                                                                                                                                                                                                                                                    |   |                           |   |                         |   |                           |   |                     |   |                          |
| 83 | section_2_action_2_b<br>Show the field ONLY if:<br>[section_2_action_2_yes_no] = '1'    | B. How acceptable was using an implementation advisor for bundle-related efforts among ICU team members?                                                                                                                                                                                                                                          | radio, Required<br><table border="1"> <tr> <td>1</td> <td>1 = Not at all acceptable</td> </tr> <tr> <td>2</td> <td>2 = Somewhat acceptable</td> </tr> <tr> <td>3</td> <td>3 = Moderately acceptable</td> </tr> <tr> <td>4</td> <td>4 = Very acceptable</td> </tr> <tr> <td>5</td> <td>5 = Extremely acceptable</td> </tr> </table> | 1 | 1 = Not at all acceptable | 2 | 2 = Somewhat acceptable | 3 | 3 = Moderately acceptable | 4 | 4 = Very acceptable | 5 | 5 = Extremely acceptable |
| 1  | 1 = Not at all acceptable                                                               |                                                                                                                                                                                                                                                                                                                                                   |                                                                                                                                                                                                                                                                                                                                    |   |                           |   |                         |   |                           |   |                     |   |                          |
| 2  | 2 = Somewhat acceptable                                                                 |                                                                                                                                                                                                                                                                                                                                                   |                                                                                                                                                                                                                                                                                                                                    |   |                           |   |                         |   |                           |   |                     |   |                          |
| 3  | 3 = Moderately acceptable                                                               |                                                                                                                                                                                                                                                                                                                                                   |                                                                                                                                                                                                                                                                                                                                    |   |                           |   |                         |   |                           |   |                     |   |                          |
| 4  | 4 = Very acceptable                                                                     |                                                                                                                                                                                                                                                                                                                                                   |                                                                                                                                                                                                                                                                                                                                    |   |                           |   |                         |   |                           |   |                     |   |                          |
| 5  | 5 = Extremely acceptable                                                                |                                                                                                                                                                                                                                                                                                                                                   |                                                                                                                                                                                                                                                                                                                                    |   |                           |   |                         |   |                           |   |                     |   |                          |

|    |                                                                                                     |                                                                                                                                                                                                                                                 |                                                                                                                                                                                                                                                                                                                         |   |                           |   |                         |   |                           |   |                     |   |                          |
|----|-----------------------------------------------------------------------------------------------------|-------------------------------------------------------------------------------------------------------------------------------------------------------------------------------------------------------------------------------------------------|-------------------------------------------------------------------------------------------------------------------------------------------------------------------------------------------------------------------------------------------------------------------------------------------------------------------------|---|---------------------------|---|-------------------------|---|---------------------------|---|---------------------|---|--------------------------|
| 84 | <p>section_2_action_2_c</p> <p>Show the field ONLY if:<br/>[section_2_action_2_yes_no] = '1'</p>    | <p>C. How feasible was it to use an implementation advisor for bundle-related efforts?</p>                                                                                                                                                      | <p>radio, Required</p> <table border="1"> <tr><td>1</td><td>1 = Not at all feasible</td></tr> <tr><td>2</td><td>2 = Somewhat feasible</td></tr> <tr><td>3</td><td>3 = Moderately feasible</td></tr> <tr><td>4</td><td>4 = Very feasible</td></tr> <tr><td>5</td><td>5 = Extremely feasible</td></tr> </table>           | 1 | 1 = Not at all feasible   | 2 | 2 = Somewhat feasible   | 3 | 3 = Moderately feasible   | 4 | 4 = Very feasible   | 5 | 5 = Extremely feasible   |
| 1  | 1 = Not at all feasible                                                                             |                                                                                                                                                                                                                                                 |                                                                                                                                                                                                                                                                                                                         |   |                           |   |                         |   |                           |   |                     |   |                          |
| 2  | 2 = Somewhat feasible                                                                               |                                                                                                                                                                                                                                                 |                                                                                                                                                                                                                                                                                                                         |   |                           |   |                         |   |                           |   |                     |   |                          |
| 3  | 3 = Moderately feasible                                                                             |                                                                                                                                                                                                                                                 |                                                                                                                                                                                                                                                                                                                         |   |                           |   |                         |   |                           |   |                     |   |                          |
| 4  | 4 = Very feasible                                                                                   |                                                                                                                                                                                                                                                 |                                                                                                                                                                                                                                                                                                                         |   |                           |   |                         |   |                           |   |                     |   |                          |
| 5  | 5 = Extremely feasible                                                                              |                                                                                                                                                                                                                                                 |                                                                                                                                                                                                                                                                                                                         |   |                           |   |                         |   |                           |   |                     |   |                          |
| 85 | <p>section_2_action_2_d</p> <p>Show the field ONLY if:<br/>[section_2_action_2_yes_no] = '1'</p>    | <p>D. How costly (in terms of staff time, equipment, and other) was using an implementation advisor for bundle-related efforts?</p>                                                                                                             | <p>radio, Required</p> <table border="1"> <tr><td>1</td><td>1 =Not at all costly</td></tr> <tr><td>2</td><td>2 = Somewhat costly</td></tr> <tr><td>3</td><td>3 = Moderately costly</td></tr> <tr><td>4</td><td>4 = Very costly</td></tr> <tr><td>5</td><td>5 = Extremely costly</td></tr> </table>                      | 1 | 1 =Not at all costly      | 2 | 2 = Somewhat costly     | 3 | 3 = Moderately costly     | 4 | 4 = Very costly     | 5 | 5 = Extremely costly     |
| 1  | 1 =Not at all costly                                                                                |                                                                                                                                                                                                                                                 |                                                                                                                                                                                                                                                                                                                         |   |                           |   |                         |   |                           |   |                     |   |                          |
| 2  | 2 = Somewhat costly                                                                                 |                                                                                                                                                                                                                                                 |                                                                                                                                                                                                                                                                                                                         |   |                           |   |                         |   |                           |   |                     |   |                          |
| 3  | 3 = Moderately costly                                                                               |                                                                                                                                                                                                                                                 |                                                                                                                                                                                                                                                                                                                         |   |                           |   |                         |   |                           |   |                     |   |                          |
| 4  | 4 = Very costly                                                                                     |                                                                                                                                                                                                                                                 |                                                                                                                                                                                                                                                                                                                         |   |                           |   |                         |   |                           |   |                     |   |                          |
| 5  | 5 = Extremely costly                                                                                |                                                                                                                                                                                                                                                 |                                                                                                                                                                                                                                                                                                                         |   |                           |   |                         |   |                           |   |                     |   |                          |
| 86 | <p>section_2_action_3_yes_no</p>                                                                    | <p>Action 3: Visit other sites</p> <p>Q: Did your institution visit sites where a similar ABCDEF implementation effort was considered successful?</p> <p>If action not used, mark "No" and go to next reflection question</p>                   | <p>yesno, Required</p> <table border="1"> <tr><td>1</td><td>Yes</td></tr> <tr><td>0</td><td>No</td></tr> </table> <p>Custom alignment: RH</p>                                                                                                                                                                           | 1 | Yes                       | 0 | No                      |   |                           |   |                     |   |                          |
| 1  | Yes                                                                                                 |                                                                                                                                                                                                                                                 |                                                                                                                                                                                                                                                                                                                         |   |                           |   |                         |   |                           |   |                     |   |                          |
| 0  | No                                                                                                  |                                                                                                                                                                                                                                                 |                                                                                                                                                                                                                                                                                                                         |   |                           |   |                         |   |                           |   |                     |   |                          |
| 87 | <p>section_2_action_3_text</p> <p>Show the field ONLY if:<br/>[section_2_action_3_yes_no] = '1'</p> | <p>When reflecting on your ICU's ABCDEF bundle implementation efforts:</p>                                                                                                                                                                      | <p>descriptive</p>                                                                                                                                                                                                                                                                                                      |   |                           |   |                         |   |                           |   |                     |   |                          |
| 88 | <p>section_2_action_3_a</p> <p>Show the field ONLY if:<br/>[section_2_action_3_yes_no] = '1'</p>    | <p>A. How helpful was visiting other sites for increasing bundle adoption?</p>                                                                                                                                                                  | <p>radio, Required</p> <table border="1"> <tr><td>1</td><td>1 = Not at all helpful</td></tr> <tr><td>2</td><td>2 = Somewhat helpful</td></tr> <tr><td>3</td><td>3 = Moderately helpful</td></tr> <tr><td>4</td><td>4 = Very helpful</td></tr> <tr><td>5</td><td>5 = Extremely helpful</td></tr> </table>                | 1 | 1 = Not at all helpful    | 2 | 2 = Somewhat helpful    | 3 | 3 = Moderately helpful    | 4 | 4 = Very helpful    | 5 | 5 = Extremely helpful    |
| 1  | 1 = Not at all helpful                                                                              |                                                                                                                                                                                                                                                 |                                                                                                                                                                                                                                                                                                                         |   |                           |   |                         |   |                           |   |                     |   |                          |
| 2  | 2 = Somewhat helpful                                                                                |                                                                                                                                                                                                                                                 |                                                                                                                                                                                                                                                                                                                         |   |                           |   |                         |   |                           |   |                     |   |                          |
| 3  | 3 = Moderately helpful                                                                              |                                                                                                                                                                                                                                                 |                                                                                                                                                                                                                                                                                                                         |   |                           |   |                         |   |                           |   |                     |   |                          |
| 4  | 4 = Very helpful                                                                                    |                                                                                                                                                                                                                                                 |                                                                                                                                                                                                                                                                                                                         |   |                           |   |                         |   |                           |   |                     |   |                          |
| 5  | 5 = Extremely helpful                                                                               |                                                                                                                                                                                                                                                 |                                                                                                                                                                                                                                                                                                                         |   |                           |   |                         |   |                           |   |                     |   |                          |
| 89 | <p>section_2_action_3_b</p> <p>Show the field ONLY if:<br/>[section_2_action_3_yes_no] = '1'</p>    | <p>B. How acceptable was visiting other sites that were successful in bundle implementation among ICU team members?</p>                                                                                                                         | <p>radio, Required</p> <table border="1"> <tr><td>1</td><td>1 = Not at all acceptable</td></tr> <tr><td>2</td><td>2 = Somewhat acceptable</td></tr> <tr><td>3</td><td>3 = Moderately acceptable</td></tr> <tr><td>4</td><td>4 = Very acceptable</td></tr> <tr><td>5</td><td>5 = Extremely acceptable</td></tr> </table> | 1 | 1 = Not at all acceptable | 2 | 2 = Somewhat acceptable | 3 | 3 = Moderately acceptable | 4 | 4 = Very acceptable | 5 | 5 = Extremely acceptable |
| 1  | 1 = Not at all acceptable                                                                           |                                                                                                                                                                                                                                                 |                                                                                                                                                                                                                                                                                                                         |   |                           |   |                         |   |                           |   |                     |   |                          |
| 2  | 2 = Somewhat acceptable                                                                             |                                                                                                                                                                                                                                                 |                                                                                                                                                                                                                                                                                                                         |   |                           |   |                         |   |                           |   |                     |   |                          |
| 3  | 3 = Moderately acceptable                                                                           |                                                                                                                                                                                                                                                 |                                                                                                                                                                                                                                                                                                                         |   |                           |   |                         |   |                           |   |                     |   |                          |
| 4  | 4 = Very acceptable                                                                                 |                                                                                                                                                                                                                                                 |                                                                                                                                                                                                                                                                                                                         |   |                           |   |                         |   |                           |   |                     |   |                          |
| 5  | 5 = Extremely acceptable                                                                            |                                                                                                                                                                                                                                                 |                                                                                                                                                                                                                                                                                                                         |   |                           |   |                         |   |                           |   |                     |   |                          |
| 90 | <p>section_2_action_3_c</p> <p>Show the field ONLY if:<br/>[section_2_action_3_yes_no] = '1'</p>    | <p>C. How feasible was it to visit other sites that were successful in bundle implementation?</p>                                                                                                                                               | <p>radio, Required</p> <table border="1"> <tr><td>1</td><td>1 = Not at all feasible</td></tr> <tr><td>2</td><td>2 = Somewhat feasible</td></tr> <tr><td>3</td><td>3 = Moderately feasible</td></tr> <tr><td>4</td><td>4 = Very feasible</td></tr> <tr><td>5</td><td>5 = Extremely feasible</td></tr> </table>           | 1 | 1 = Not at all feasible   | 2 | 2 = Somewhat feasible   | 3 | 3 = Moderately feasible   | 4 | 4 = Very feasible   | 5 | 5 = Extremely feasible   |
| 1  | 1 = Not at all feasible                                                                             |                                                                                                                                                                                                                                                 |                                                                                                                                                                                                                                                                                                                         |   |                           |   |                         |   |                           |   |                     |   |                          |
| 2  | 2 = Somewhat feasible                                                                               |                                                                                                                                                                                                                                                 |                                                                                                                                                                                                                                                                                                                         |   |                           |   |                         |   |                           |   |                     |   |                          |
| 3  | 3 = Moderately feasible                                                                             |                                                                                                                                                                                                                                                 |                                                                                                                                                                                                                                                                                                                         |   |                           |   |                         |   |                           |   |                     |   |                          |
| 4  | 4 = Very feasible                                                                                   |                                                                                                                                                                                                                                                 |                                                                                                                                                                                                                                                                                                                         |   |                           |   |                         |   |                           |   |                     |   |                          |
| 5  | 5 = Extremely feasible                                                                              |                                                                                                                                                                                                                                                 |                                                                                                                                                                                                                                                                                                                         |   |                           |   |                         |   |                           |   |                     |   |                          |
| 91 | <p>section_2_action_3_d</p> <p>Show the field ONLY if:<br/>[section_2_action_3_yes_no] = '1'</p>    | <p>D. How costly (in terms of staff time, equipment, and other) was visiting other sites that were successful in bundle implementation?</p>                                                                                                     | <p>radio, Required</p> <table border="1"> <tr><td>1</td><td>1 =Not at all costly</td></tr> <tr><td>2</td><td>2 = Somewhat costly</td></tr> <tr><td>3</td><td>3 = Moderately costly</td></tr> <tr><td>4</td><td>4 = Very costly</td></tr> <tr><td>5</td><td>5 = Extremely costly</td></tr> </table>                      | 1 | 1 =Not at all costly      | 2 | 2 = Somewhat costly     | 3 | 3 = Moderately costly     | 4 | 4 = Very costly     | 5 | 5 = Extremely costly     |
| 1  | 1 =Not at all costly                                                                                |                                                                                                                                                                                                                                                 |                                                                                                                                                                                                                                                                                                                         |   |                           |   |                         |   |                           |   |                     |   |                          |
| 2  | 2 = Somewhat costly                                                                                 |                                                                                                                                                                                                                                                 |                                                                                                                                                                                                                                                                                                                         |   |                           |   |                         |   |                           |   |                     |   |                          |
| 3  | 3 = Moderately costly                                                                               |                                                                                                                                                                                                                                                 |                                                                                                                                                                                                                                                                                                                         |   |                           |   |                         |   |                           |   |                     |   |                          |
| 4  | 4 = Very costly                                                                                     |                                                                                                                                                                                                                                                 |                                                                                                                                                                                                                                                                                                                         |   |                           |   |                         |   |                           |   |                     |   |                          |
| 5  | 5 = Extremely costly                                                                                |                                                                                                                                                                                                                                                 |                                                                                                                                                                                                                                                                                                                         |   |                           |   |                         |   |                           |   |                     |   |                          |
| 92 | <p>section_2_action_4_yes_no</p>                                                                    | <p>Action 4: Recruit, designate, and train for leadership</p> <p>Q: Did your institution recruit, designate, and train leaders for the ABCDEF bundle change effort?</p> <p>If action not used, mark "No" and go to next reflection question</p> | <p>yesno, Required</p> <table border="1"> <tr><td>1</td><td>Yes</td></tr> <tr><td>0</td><td>No</td></tr> </table> <p>Custom alignment: RH</p>                                                                                                                                                                           | 1 | Yes                       | 0 | No                      |   |                           |   |                     |   |                          |
| 1  | Yes                                                                                                 |                                                                                                                                                                                                                                                 |                                                                                                                                                                                                                                                                                                                         |   |                           |   |                         |   |                           |   |                     |   |                          |
| 0  | No                                                                                                  |                                                                                                                                                                                                                                                 |                                                                                                                                                                                                                                                                                                                         |   |                           |   |                         |   |                           |   |                     |   |                          |
| 93 | <p>section_2_action_4_text</p> <p>Show the field ONLY if:<br/>[section_2_action_4_yes_no] = '1'</p> | <p>When reflecting on your ICU's ABCDEF bundle implementation efforts:</p>                                                                                                                                                                      | <p>descriptive</p>                                                                                                                                                                                                                                                                                                      |   |                           |   |                         |   |                           |   |                     |   |                          |

|     |                                                                                                     |                                                                                                                                                                                                                                                                        |                                                                                                                                                                                                                                                                                                                         |   |                           |   |                         |   |                           |   |                     |   |                          |
|-----|-----------------------------------------------------------------------------------------------------|------------------------------------------------------------------------------------------------------------------------------------------------------------------------------------------------------------------------------------------------------------------------|-------------------------------------------------------------------------------------------------------------------------------------------------------------------------------------------------------------------------------------------------------------------------------------------------------------------------|---|---------------------------|---|-------------------------|---|---------------------------|---|---------------------|---|--------------------------|
| 94  | <p>section_2_action_4_a</p> <p>Show the field ONLY if:<br/>[section_2_action_4_yes_no] = '1'</p>    | A. How helpful was recruiting, designating, and training for leadership for increasing bundle adoption?                                                                                                                                                                | <p>radio, Required</p> <table border="1"> <tr><td>1</td><td>1 = Not at all helpful</td></tr> <tr><td>2</td><td>2 = Somewhat helpful</td></tr> <tr><td>3</td><td>3 = Moderately helpful</td></tr> <tr><td>4</td><td>4 = Very helpful</td></tr> <tr><td>5</td><td>5 = Extremely helpful</td></tr> </table>                | 1 | 1 = Not at all helpful    | 2 | 2 = Somewhat helpful    | 3 | 3 = Moderately helpful    | 4 | 4 = Very helpful    | 5 | 5 = Extremely helpful    |
| 1   | 1 = Not at all helpful                                                                              |                                                                                                                                                                                                                                                                        |                                                                                                                                                                                                                                                                                                                         |   |                           |   |                         |   |                           |   |                     |   |                          |
| 2   | 2 = Somewhat helpful                                                                                |                                                                                                                                                                                                                                                                        |                                                                                                                                                                                                                                                                                                                         |   |                           |   |                         |   |                           |   |                     |   |                          |
| 3   | 3 = Moderately helpful                                                                              |                                                                                                                                                                                                                                                                        |                                                                                                                                                                                                                                                                                                                         |   |                           |   |                         |   |                           |   |                     |   |                          |
| 4   | 4 = Very helpful                                                                                    |                                                                                                                                                                                                                                                                        |                                                                                                                                                                                                                                                                                                                         |   |                           |   |                         |   |                           |   |                     |   |                          |
| 5   | 5 = Extremely helpful                                                                               |                                                                                                                                                                                                                                                                        |                                                                                                                                                                                                                                                                                                                         |   |                           |   |                         |   |                           |   |                     |   |                          |
| 95  | <p>section_2_action_4_b</p> <p>Show the field ONLY if:<br/>[section_2_action_4_yes_no] = '1'</p>    | B. How acceptable was recruiting, designating, and training for bundle-related leadership among ICU team members?                                                                                                                                                      | <p>radio, Required</p> <table border="1"> <tr><td>1</td><td>1 = Not at all acceptable</td></tr> <tr><td>2</td><td>2 = Somewhat acceptable</td></tr> <tr><td>3</td><td>3 = Moderately acceptable</td></tr> <tr><td>4</td><td>4 = Very acceptable</td></tr> <tr><td>5</td><td>5 = Extremely acceptable</td></tr> </table> | 1 | 1 = Not at all acceptable | 2 | 2 = Somewhat acceptable | 3 | 3 = Moderately acceptable | 4 | 4 = Very acceptable | 5 | 5 = Extremely acceptable |
| 1   | 1 = Not at all acceptable                                                                           |                                                                                                                                                                                                                                                                        |                                                                                                                                                                                                                                                                                                                         |   |                           |   |                         |   |                           |   |                     |   |                          |
| 2   | 2 = Somewhat acceptable                                                                             |                                                                                                                                                                                                                                                                        |                                                                                                                                                                                                                                                                                                                         |   |                           |   |                         |   |                           |   |                     |   |                          |
| 3   | 3 = Moderately acceptable                                                                           |                                                                                                                                                                                                                                                                        |                                                                                                                                                                                                                                                                                                                         |   |                           |   |                         |   |                           |   |                     |   |                          |
| 4   | 4 = Very acceptable                                                                                 |                                                                                                                                                                                                                                                                        |                                                                                                                                                                                                                                                                                                                         |   |                           |   |                         |   |                           |   |                     |   |                          |
| 5   | 5 = Extremely acceptable                                                                            |                                                                                                                                                                                                                                                                        |                                                                                                                                                                                                                                                                                                                         |   |                           |   |                         |   |                           |   |                     |   |                          |
| 96  | <p>section_2_action_4_c</p> <p>Show the field ONLY if:<br/>[section_2_action_4_yes_no] = '1'</p>    | C. How feasible was it to recruit, designate, and train for bundle-related leadership?                                                                                                                                                                                 | <p>radio, Required</p> <table border="1"> <tr><td>1</td><td>1 = Not at all feasible</td></tr> <tr><td>2</td><td>2 = Somewhat feasible</td></tr> <tr><td>3</td><td>3 = Moderately feasible</td></tr> <tr><td>4</td><td>4 = Very feasible</td></tr> <tr><td>5</td><td>5 = Extremely feasible</td></tr> </table>           | 1 | 1 = Not at all feasible   | 2 | 2 = Somewhat feasible   | 3 | 3 = Moderately feasible   | 4 | 4 = Very feasible   | 5 | 5 = Extremely feasible   |
| 1   | 1 = Not at all feasible                                                                             |                                                                                                                                                                                                                                                                        |                                                                                                                                                                                                                                                                                                                         |   |                           |   |                         |   |                           |   |                     |   |                          |
| 2   | 2 = Somewhat feasible                                                                               |                                                                                                                                                                                                                                                                        |                                                                                                                                                                                                                                                                                                                         |   |                           |   |                         |   |                           |   |                     |   |                          |
| 3   | 3 = Moderately feasible                                                                             |                                                                                                                                                                                                                                                                        |                                                                                                                                                                                                                                                                                                                         |   |                           |   |                         |   |                           |   |                     |   |                          |
| 4   | 4 = Very feasible                                                                                   |                                                                                                                                                                                                                                                                        |                                                                                                                                                                                                                                                                                                                         |   |                           |   |                         |   |                           |   |                     |   |                          |
| 5   | 5 = Extremely feasible                                                                              |                                                                                                                                                                                                                                                                        |                                                                                                                                                                                                                                                                                                                         |   |                           |   |                         |   |                           |   |                     |   |                          |
| 97  | <p>section_2_action_4_d</p> <p>Show the field ONLY if:<br/>[section_2_action_4_yes_no] = '1'</p>    | D. How costly (in terms of staff time, equipment, and other) was recruiting, designating, and training for bundle-related leadership?                                                                                                                                  | <p>radio, Required</p> <table border="1"> <tr><td>1</td><td>1 =Not at all costly</td></tr> <tr><td>2</td><td>2 = Somewhat costly</td></tr> <tr><td>3</td><td>3 = Moderately costly</td></tr> <tr><td>4</td><td>4 = Very costly</td></tr> <tr><td>5</td><td>5 = Extremely costly</td></tr> </table>                      | 1 | 1 =Not at all costly      | 2 | 2 = Somewhat costly     | 3 | 3 = Moderately costly     | 4 | 4 = Very costly     | 5 | 5 = Extremely costly     |
| 1   | 1 =Not at all costly                                                                                |                                                                                                                                                                                                                                                                        |                                                                                                                                                                                                                                                                                                                         |   |                           |   |                         |   |                           |   |                     |   |                          |
| 2   | 2 = Somewhat costly                                                                                 |                                                                                                                                                                                                                                                                        |                                                                                                                                                                                                                                                                                                                         |   |                           |   |                         |   |                           |   |                     |   |                          |
| 3   | 3 = Moderately costly                                                                               |                                                                                                                                                                                                                                                                        |                                                                                                                                                                                                                                                                                                                         |   |                           |   |                         |   |                           |   |                     |   |                          |
| 4   | 4 = Very costly                                                                                     |                                                                                                                                                                                                                                                                        |                                                                                                                                                                                                                                                                                                                         |   |                           |   |                         |   |                           |   |                     |   |                          |
| 5   | 5 = Extremely costly                                                                                |                                                                                                                                                                                                                                                                        |                                                                                                                                                                                                                                                                                                                         |   |                           |   |                         |   |                           |   |                     |   |                          |
| 98  | <p>section_2_action_5_yes_no</p>                                                                    | <p>Action 5: Inform local opinion leaders</p> <p>Q: Did your institution inform providers identified by colleagues as "opinion leaders" or "educationally influential" about the ABCDEF bundle in the hopes that they will influence other colleagues to adopt it?</p> | <p>yesno, Required</p> <table border="1"> <tr><td>1</td><td>Yes</td></tr> <tr><td>0</td><td>No</td></tr> </table> <p>Custom alignment: RH</p>                                                                                                                                                                           | 1 | Yes                       | 0 | No                      |   |                           |   |                     |   |                          |
| 1   | Yes                                                                                                 |                                                                                                                                                                                                                                                                        |                                                                                                                                                                                                                                                                                                                         |   |                           |   |                         |   |                           |   |                     |   |                          |
| 0   | No                                                                                                  |                                                                                                                                                                                                                                                                        |                                                                                                                                                                                                                                                                                                                         |   |                           |   |                         |   |                           |   |                     |   |                          |
| 99  | <p>section_2_action_5_text</p> <p>Show the field ONLY if:<br/>[section_2_action_5_yes_no] = '1'</p> | When reflecting on your ICU's ABCDEF bundle implementation efforts:                                                                                                                                                                                                    | descriptive                                                                                                                                                                                                                                                                                                             |   |                           |   |                         |   |                           |   |                     |   |                          |
| 100 | <p>section_2_action_5_a</p> <p>Show the field ONLY if:<br/>[section_2_action_5_yes_no] = '1'</p>    | A. How helpful was informing local opinion leaders for increasing bundle adoption?                                                                                                                                                                                     | <p>radio, Required</p> <table border="1"> <tr><td>1</td><td>1 = Not at all helpful</td></tr> <tr><td>2</td><td>2 = Somewhat helpful</td></tr> <tr><td>3</td><td>3 = Moderately helpful</td></tr> <tr><td>4</td><td>4 = Very helpful</td></tr> <tr><td>5</td><td>5 = Extremely helpful</td></tr> </table>                | 1 | 1 = Not at all helpful    | 2 | 2 = Somewhat helpful    | 3 | 3 = Moderately helpful    | 4 | 4 = Very helpful    | 5 | 5 = Extremely helpful    |
| 1   | 1 = Not at all helpful                                                                              |                                                                                                                                                                                                                                                                        |                                                                                                                                                                                                                                                                                                                         |   |                           |   |                         |   |                           |   |                     |   |                          |
| 2   | 2 = Somewhat helpful                                                                                |                                                                                                                                                                                                                                                                        |                                                                                                                                                                                                                                                                                                                         |   |                           |   |                         |   |                           |   |                     |   |                          |
| 3   | 3 = Moderately helpful                                                                              |                                                                                                                                                                                                                                                                        |                                                                                                                                                                                                                                                                                                                         |   |                           |   |                         |   |                           |   |                     |   |                          |
| 4   | 4 = Very helpful                                                                                    |                                                                                                                                                                                                                                                                        |                                                                                                                                                                                                                                                                                                                         |   |                           |   |                         |   |                           |   |                     |   |                          |
| 5   | 5 = Extremely helpful                                                                               |                                                                                                                                                                                                                                                                        |                                                                                                                                                                                                                                                                                                                         |   |                           |   |                         |   |                           |   |                     |   |                          |
| 101 | <p>section_2_action_5_b</p> <p>Show the field ONLY if:<br/>[section_2_action_5_yes_no] = '1'</p>    | B. How acceptable was informing local opinion leaders about the bundle among ICU team members?                                                                                                                                                                         | <p>radio, Required</p> <table border="1"> <tr><td>1</td><td>1 = Not at all acceptable</td></tr> <tr><td>2</td><td>2 = Somewhat acceptable</td></tr> <tr><td>3</td><td>3 = Moderately acceptable</td></tr> <tr><td>4</td><td>4 = Very acceptable</td></tr> <tr><td>5</td><td>5 = Extremely acceptable</td></tr> </table> | 1 | 1 = Not at all acceptable | 2 | 2 = Somewhat acceptable | 3 | 3 = Moderately acceptable | 4 | 4 = Very acceptable | 5 | 5 = Extremely acceptable |
| 1   | 1 = Not at all acceptable                                                                           |                                                                                                                                                                                                                                                                        |                                                                                                                                                                                                                                                                                                                         |   |                           |   |                         |   |                           |   |                     |   |                          |
| 2   | 2 = Somewhat acceptable                                                                             |                                                                                                                                                                                                                                                                        |                                                                                                                                                                                                                                                                                                                         |   |                           |   |                         |   |                           |   |                     |   |                          |
| 3   | 3 = Moderately acceptable                                                                           |                                                                                                                                                                                                                                                                        |                                                                                                                                                                                                                                                                                                                         |   |                           |   |                         |   |                           |   |                     |   |                          |
| 4   | 4 = Very acceptable                                                                                 |                                                                                                                                                                                                                                                                        |                                                                                                                                                                                                                                                                                                                         |   |                           |   |                         |   |                           |   |                     |   |                          |
| 5   | 5 = Extremely acceptable                                                                            |                                                                                                                                                                                                                                                                        |                                                                                                                                                                                                                                                                                                                         |   |                           |   |                         |   |                           |   |                     |   |                          |
| 102 | <p>section_2_action_5_c</p> <p>Show the field ONLY if:<br/>[section_2_action_5_yes_no] = '1'</p>    | C. How feasible was it to inform local opinion leaders about the bundle?                                                                                                                                                                                               | <p>radio, Required</p> <table border="1"> <tr><td>1</td><td>1 = Not at all feasible</td></tr> <tr><td>2</td><td>2 = Somewhat feasible</td></tr> <tr><td>3</td><td>3 = Moderately feasible</td></tr> <tr><td>4</td><td>4 = Very feasible</td></tr> <tr><td>5</td><td>5 = Extremely feasible</td></tr> </table>           | 1 | 1 = Not at all feasible   | 2 | 2 = Somewhat feasible   | 3 | 3 = Moderately feasible   | 4 | 4 = Very feasible   | 5 | 5 = Extremely feasible   |
| 1   | 1 = Not at all feasible                                                                             |                                                                                                                                                                                                                                                                        |                                                                                                                                                                                                                                                                                                                         |   |                           |   |                         |   |                           |   |                     |   |                          |
| 2   | 2 = Somewhat feasible                                                                               |                                                                                                                                                                                                                                                                        |                                                                                                                                                                                                                                                                                                                         |   |                           |   |                         |   |                           |   |                     |   |                          |
| 3   | 3 = Moderately feasible                                                                             |                                                                                                                                                                                                                                                                        |                                                                                                                                                                                                                                                                                                                         |   |                           |   |                         |   |                           |   |                     |   |                          |
| 4   | 4 = Very feasible                                                                                   |                                                                                                                                                                                                                                                                        |                                                                                                                                                                                                                                                                                                                         |   |                           |   |                         |   |                           |   |                     |   |                          |
| 5   | 5 = Extremely feasible                                                                              |                                                                                                                                                                                                                                                                        |                                                                                                                                                                                                                                                                                                                         |   |                           |   |                         |   |                           |   |                     |   |                          |

|     |                                                                                                     |                                                                                                                                                                                                                                                                                                                                                                                                                                          |                                                                                                                                                                                                                                                                                                                         |   |                           |   |                         |   |                           |   |                     |   |                          |
|-----|-----------------------------------------------------------------------------------------------------|------------------------------------------------------------------------------------------------------------------------------------------------------------------------------------------------------------------------------------------------------------------------------------------------------------------------------------------------------------------------------------------------------------------------------------------|-------------------------------------------------------------------------------------------------------------------------------------------------------------------------------------------------------------------------------------------------------------------------------------------------------------------------|---|---------------------------|---|-------------------------|---|---------------------------|---|---------------------|---|--------------------------|
| 103 | <p>section_2_action_5_d</p> <p>Show the field ONLY if:<br/>[section_2_action_5_yes_no] = '1'</p>    | <p>D. How costly (in terms of staff time, equipment, and other) was informing local opinion leaders about the bundle?</p>                                                                                                                                                                                                                                                                                                                | <p>radio, Required</p> <table border="1"> <tr><td>1</td><td>1 = Not at all costly</td></tr> <tr><td>2</td><td>2 = Somewhat costly</td></tr> <tr><td>3</td><td>3 = Moderately costly</td></tr> <tr><td>4</td><td>4 = Very costly</td></tr> <tr><td>5</td><td>5 = Extremely costly</td></tr> </table>                     | 1 | 1 = Not at all costly     | 2 | 2 = Somewhat costly     | 3 | 3 = Moderately costly     | 4 | 4 = Very costly     | 5 | 5 = Extremely costly     |
| 1   | 1 = Not at all costly                                                                               |                                                                                                                                                                                                                                                                                                                                                                                                                                          |                                                                                                                                                                                                                                                                                                                         |   |                           |   |                         |   |                           |   |                     |   |                          |
| 2   | 2 = Somewhat costly                                                                                 |                                                                                                                                                                                                                                                                                                                                                                                                                                          |                                                                                                                                                                                                                                                                                                                         |   |                           |   |                         |   |                           |   |                     |   |                          |
| 3   | 3 = Moderately costly                                                                               |                                                                                                                                                                                                                                                                                                                                                                                                                                          |                                                                                                                                                                                                                                                                                                                         |   |                           |   |                         |   |                           |   |                     |   |                          |
| 4   | 4 = Very costly                                                                                     |                                                                                                                                                                                                                                                                                                                                                                                                                                          |                                                                                                                                                                                                                                                                                                                         |   |                           |   |                         |   |                           |   |                     |   |                          |
| 5   | 5 = Extremely costly                                                                                |                                                                                                                                                                                                                                                                                                                                                                                                                                          |                                                                                                                                                                                                                                                                                                                         |   |                           |   |                         |   |                           |   |                     |   |                          |
| 104 | <p>section_2_action_6_yes_no</p>                                                                    | <p>Action 6: Develop academic partnerships</p> <p>Q: Did your institution partner with a university or academic unit for the purposes of shared training and bringing research skills to implement the ABCDEF bundle?</p> <p>If action not used, mark "No" and go to next reflection question</p>                                                                                                                                        | <p>yesno, Required</p> <table border="1"> <tr><td>1</td><td>Yes</td></tr> <tr><td>0</td><td>No</td></tr> </table> <p>Custom alignment: RH</p>                                                                                                                                                                           | 1 | Yes                       | 0 | No                      |   |                           |   |                     |   |                          |
| 1   | Yes                                                                                                 |                                                                                                                                                                                                                                                                                                                                                                                                                                          |                                                                                                                                                                                                                                                                                                                         |   |                           |   |                         |   |                           |   |                     |   |                          |
| 0   | No                                                                                                  |                                                                                                                                                                                                                                                                                                                                                                                                                                          |                                                                                                                                                                                                                                                                                                                         |   |                           |   |                         |   |                           |   |                     |   |                          |
| 105 | <p>section_2_action_6_text</p> <p>Show the field ONLY if:<br/>[section_2_action_6_yes_no] = '1'</p> | <p>When reflecting on your ICU's ABCDEF bundle implementation efforts:</p>                                                                                                                                                                                                                                                                                                                                                               | <p>descriptive</p>                                                                                                                                                                                                                                                                                                      |   |                           |   |                         |   |                           |   |                     |   |                          |
| 106 | <p>section_2_action_6_a</p> <p>Show the field ONLY if:<br/>[section_2_action_6_yes_no] = '1'</p>    | <p>A. How helpful was developing academic partnerships for increasing bundle adoption?</p>                                                                                                                                                                                                                                                                                                                                               | <p>radio, Required</p> <table border="1"> <tr><td>1</td><td>1 = Not at all helpful</td></tr> <tr><td>2</td><td>2 = Somewhat helpful</td></tr> <tr><td>3</td><td>3 = Moderately helpful</td></tr> <tr><td>4</td><td>4 = Very helpful</td></tr> <tr><td>5</td><td>5 = Extremely helpful</td></tr> </table>                | 1 | 1 = Not at all helpful    | 2 | 2 = Somewhat helpful    | 3 | 3 = Moderately helpful    | 4 | 4 = Very helpful    | 5 | 5 = Extremely helpful    |
| 1   | 1 = Not at all helpful                                                                              |                                                                                                                                                                                                                                                                                                                                                                                                                                          |                                                                                                                                                                                                                                                                                                                         |   |                           |   |                         |   |                           |   |                     |   |                          |
| 2   | 2 = Somewhat helpful                                                                                |                                                                                                                                                                                                                                                                                                                                                                                                                                          |                                                                                                                                                                                                                                                                                                                         |   |                           |   |                         |   |                           |   |                     |   |                          |
| 3   | 3 = Moderately helpful                                                                              |                                                                                                                                                                                                                                                                                                                                                                                                                                          |                                                                                                                                                                                                                                                                                                                         |   |                           |   |                         |   |                           |   |                     |   |                          |
| 4   | 4 = Very helpful                                                                                    |                                                                                                                                                                                                                                                                                                                                                                                                                                          |                                                                                                                                                                                                                                                                                                                         |   |                           |   |                         |   |                           |   |                     |   |                          |
| 5   | 5 = Extremely helpful                                                                               |                                                                                                                                                                                                                                                                                                                                                                                                                                          |                                                                                                                                                                                                                                                                                                                         |   |                           |   |                         |   |                           |   |                     |   |                          |
| 107 | <p>section_2_action_6_b</p> <p>Show the field ONLY if:<br/>[section_2_action_6_yes_no] = '1'</p>    | <p>B. How acceptable was developing bundle-related academic partnerships among ICU team members?</p>                                                                                                                                                                                                                                                                                                                                     | <p>radio, Required</p> <table border="1"> <tr><td>1</td><td>1 = Not at all acceptable</td></tr> <tr><td>2</td><td>2 = Somewhat acceptable</td></tr> <tr><td>3</td><td>3 = Moderately acceptable</td></tr> <tr><td>4</td><td>4 = Very acceptable</td></tr> <tr><td>5</td><td>5 = Extremely acceptable</td></tr> </table> | 1 | 1 = Not at all acceptable | 2 | 2 = Somewhat acceptable | 3 | 3 = Moderately acceptable | 4 | 4 = Very acceptable | 5 | 5 = Extremely acceptable |
| 1   | 1 = Not at all acceptable                                                                           |                                                                                                                                                                                                                                                                                                                                                                                                                                          |                                                                                                                                                                                                                                                                                                                         |   |                           |   |                         |   |                           |   |                     |   |                          |
| 2   | 2 = Somewhat acceptable                                                                             |                                                                                                                                                                                                                                                                                                                                                                                                                                          |                                                                                                                                                                                                                                                                                                                         |   |                           |   |                         |   |                           |   |                     |   |                          |
| 3   | 3 = Moderately acceptable                                                                           |                                                                                                                                                                                                                                                                                                                                                                                                                                          |                                                                                                                                                                                                                                                                                                                         |   |                           |   |                         |   |                           |   |                     |   |                          |
| 4   | 4 = Very acceptable                                                                                 |                                                                                                                                                                                                                                                                                                                                                                                                                                          |                                                                                                                                                                                                                                                                                                                         |   |                           |   |                         |   |                           |   |                     |   |                          |
| 5   | 5 = Extremely acceptable                                                                            |                                                                                                                                                                                                                                                                                                                                                                                                                                          |                                                                                                                                                                                                                                                                                                                         |   |                           |   |                         |   |                           |   |                     |   |                          |
| 108 | <p>section_2_action_6_c</p> <p>Show the field ONLY if:<br/>[section_2_action_6_yes_no] = '1'</p>    | <p>C. How feasible was it to develop academic partnerships for bundle-related implementation efforts?</p>                                                                                                                                                                                                                                                                                                                                | <p>radio, Required</p> <table border="1"> <tr><td>1</td><td>1 = Not at all feasible</td></tr> <tr><td>2</td><td>2 = Somewhat feasible</td></tr> <tr><td>3</td><td>3 = Moderately feasible</td></tr> <tr><td>4</td><td>4 = Very feasible</td></tr> <tr><td>5</td><td>5 = Extremely feasible</td></tr> </table>           | 1 | 1 = Not at all feasible   | 2 | 2 = Somewhat feasible   | 3 | 3 = Moderately feasible   | 4 | 4 = Very feasible   | 5 | 5 = Extremely feasible   |
| 1   | 1 = Not at all feasible                                                                             |                                                                                                                                                                                                                                                                                                                                                                                                                                          |                                                                                                                                                                                                                                                                                                                         |   |                           |   |                         |   |                           |   |                     |   |                          |
| 2   | 2 = Somewhat feasible                                                                               |                                                                                                                                                                                                                                                                                                                                                                                                                                          |                                                                                                                                                                                                                                                                                                                         |   |                           |   |                         |   |                           |   |                     |   |                          |
| 3   | 3 = Moderately feasible                                                                             |                                                                                                                                                                                                                                                                                                                                                                                                                                          |                                                                                                                                                                                                                                                                                                                         |   |                           |   |                         |   |                           |   |                     |   |                          |
| 4   | 4 = Very feasible                                                                                   |                                                                                                                                                                                                                                                                                                                                                                                                                                          |                                                                                                                                                                                                                                                                                                                         |   |                           |   |                         |   |                           |   |                     |   |                          |
| 5   | 5 = Extremely feasible                                                                              |                                                                                                                                                                                                                                                                                                                                                                                                                                          |                                                                                                                                                                                                                                                                                                                         |   |                           |   |                         |   |                           |   |                     |   |                          |
| 109 | <p>section_2_action_6_d</p> <p>Show the field ONLY if:<br/>[section_2_action_6_yes_no] = '1'</p>    | <p>D. How costly (in terms of staff time, equipment, and other) was developing academic partnerships for bundle-related implementation efforts?</p>                                                                                                                                                                                                                                                                                      | <p>radio, Required</p> <table border="1"> <tr><td>1</td><td>1 = Not at all costly</td></tr> <tr><td>2</td><td>2 = Somewhat costly</td></tr> <tr><td>3</td><td>3 = Moderately costly</td></tr> <tr><td>4</td><td>4 = Very costly</td></tr> <tr><td>5</td><td>5 = Extremely costly</td></tr> </table>                     | 1 | 1 = Not at all costly     | 2 | 2 = Somewhat costly     | 3 | 3 = Moderately costly     | 4 | 4 = Very costly     | 5 | 5 = Extremely costly     |
| 1   | 1 = Not at all costly                                                                               |                                                                                                                                                                                                                                                                                                                                                                                                                                          |                                                                                                                                                                                                                                                                                                                         |   |                           |   |                         |   |                           |   |                     |   |                          |
| 2   | 2 = Somewhat costly                                                                                 |                                                                                                                                                                                                                                                                                                                                                                                                                                          |                                                                                                                                                                                                                                                                                                                         |   |                           |   |                         |   |                           |   |                     |   |                          |
| 3   | 3 = Moderately costly                                                                               |                                                                                                                                                                                                                                                                                                                                                                                                                                          |                                                                                                                                                                                                                                                                                                                         |   |                           |   |                         |   |                           |   |                     |   |                          |
| 4   | 4 = Very costly                                                                                     |                                                                                                                                                                                                                                                                                                                                                                                                                                          |                                                                                                                                                                                                                                                                                                                         |   |                           |   |                         |   |                           |   |                     |   |                          |
| 5   | 5 = Extremely costly                                                                                |                                                                                                                                                                                                                                                                                                                                                                                                                                          |                                                                                                                                                                                                                                                                                                                         |   |                           |   |                         |   |                           |   |                     |   |                          |
| 110 | <p>section_2_action_7_yes_no</p>                                                                    | <p>Action 7: Promote network weaving</p> <p>Q: Did your institution identify and build on existing high-quality working relationships and networks within and outside the organization, organizational units, teams, etc. to promote information sharing, collaborative problem-solving, and a shared vision/goal related to implementing the ABCDEF bundle?</p> <p>If action not used, mark "No" and go to next reflection question</p> | <p>yesno, Required</p> <table border="1"> <tr><td>1</td><td>Yes</td></tr> <tr><td>0</td><td>No</td></tr> </table> <p>Custom alignment: RH</p>                                                                                                                                                                           | 1 | Yes                       | 0 | No                      |   |                           |   |                     |   |                          |
| 1   | Yes                                                                                                 |                                                                                                                                                                                                                                                                                                                                                                                                                                          |                                                                                                                                                                                                                                                                                                                         |   |                           |   |                         |   |                           |   |                     |   |                          |
| 0   | No                                                                                                  |                                                                                                                                                                                                                                                                                                                                                                                                                                          |                                                                                                                                                                                                                                                                                                                         |   |                           |   |                         |   |                           |   |                     |   |                          |
| 111 | <p>section_2_action_7_text</p> <p>Show the field ONLY if:<br/>[section_2_action_7_yes_no] = '1'</p> | <p>When reflecting on your ICU's ABCDEF bundle implementation efforts:</p>                                                                                                                                                                                                                                                                                                                                                               | <p>descriptive</p>                                                                                                                                                                                                                                                                                                      |   |                           |   |                         |   |                           |   |                     |   |                          |

|     |                                                                                                     |                                                                                                                                                                                                                                                         |                                                                                                                                                                                                                                                                                                                         |   |                           |   |                         |   |                           |   |                     |   |                          |
|-----|-----------------------------------------------------------------------------------------------------|---------------------------------------------------------------------------------------------------------------------------------------------------------------------------------------------------------------------------------------------------------|-------------------------------------------------------------------------------------------------------------------------------------------------------------------------------------------------------------------------------------------------------------------------------------------------------------------------|---|---------------------------|---|-------------------------|---|---------------------------|---|---------------------|---|--------------------------|
| 112 | <p>section_2_action_7_a</p> <p>Show the field ONLY if:<br/>[section_2_action_7_yes_no] = '1'</p>    | <p>A. How helpful was promoting network weaving for increasing bundle adoption?</p>                                                                                                                                                                     | <p>radio, Required</p> <table border="1"> <tr><td>1</td><td>1 = Not at all helpful</td></tr> <tr><td>2</td><td>2 = Somewhat helpful</td></tr> <tr><td>3</td><td>3 = Moderately helpful</td></tr> <tr><td>4</td><td>4 = Very helpful</td></tr> <tr><td>5</td><td>5 = Extremely helpful</td></tr> </table>                | 1 | 1 = Not at all helpful    | 2 | 2 = Somewhat helpful    | 3 | 3 = Moderately helpful    | 4 | 4 = Very helpful    | 5 | 5 = Extremely helpful    |
| 1   | 1 = Not at all helpful                                                                              |                                                                                                                                                                                                                                                         |                                                                                                                                                                                                                                                                                                                         |   |                           |   |                         |   |                           |   |                     |   |                          |
| 2   | 2 = Somewhat helpful                                                                                |                                                                                                                                                                                                                                                         |                                                                                                                                                                                                                                                                                                                         |   |                           |   |                         |   |                           |   |                     |   |                          |
| 3   | 3 = Moderately helpful                                                                              |                                                                                                                                                                                                                                                         |                                                                                                                                                                                                                                                                                                                         |   |                           |   |                         |   |                           |   |                     |   |                          |
| 4   | 4 = Very helpful                                                                                    |                                                                                                                                                                                                                                                         |                                                                                                                                                                                                                                                                                                                         |   |                           |   |                         |   |                           |   |                     |   |                          |
| 5   | 5 = Extremely helpful                                                                               |                                                                                                                                                                                                                                                         |                                                                                                                                                                                                                                                                                                                         |   |                           |   |                         |   |                           |   |                     |   |                          |
| 113 | <p>section_2_action_7_b</p> <p>Show the field ONLY if:<br/>[section_2_action_7_yes_no] = '1'</p>    | <p>B. How acceptable was promoting bundle-related network weaving among ICU team members?</p>                                                                                                                                                           | <p>radio, Required</p> <table border="1"> <tr><td>1</td><td>1 = Not at all acceptable</td></tr> <tr><td>2</td><td>2 = Somewhat acceptable</td></tr> <tr><td>3</td><td>3 = Moderately acceptable</td></tr> <tr><td>4</td><td>4 = Very acceptable</td></tr> <tr><td>5</td><td>5 = Extremely acceptable</td></tr> </table> | 1 | 1 = Not at all acceptable | 2 | 2 = Somewhat acceptable | 3 | 3 = Moderately acceptable | 4 | 4 = Very acceptable | 5 | 5 = Extremely acceptable |
| 1   | 1 = Not at all acceptable                                                                           |                                                                                                                                                                                                                                                         |                                                                                                                                                                                                                                                                                                                         |   |                           |   |                         |   |                           |   |                     |   |                          |
| 2   | 2 = Somewhat acceptable                                                                             |                                                                                                                                                                                                                                                         |                                                                                                                                                                                                                                                                                                                         |   |                           |   |                         |   |                           |   |                     |   |                          |
| 3   | 3 = Moderately acceptable                                                                           |                                                                                                                                                                                                                                                         |                                                                                                                                                                                                                                                                                                                         |   |                           |   |                         |   |                           |   |                     |   |                          |
| 4   | 4 = Very acceptable                                                                                 |                                                                                                                                                                                                                                                         |                                                                                                                                                                                                                                                                                                                         |   |                           |   |                         |   |                           |   |                     |   |                          |
| 5   | 5 = Extremely acceptable                                                                            |                                                                                                                                                                                                                                                         |                                                                                                                                                                                                                                                                                                                         |   |                           |   |                         |   |                           |   |                     |   |                          |
| 114 | <p>section_2_action_7_c</p> <p>Show the field ONLY if:<br/>[section_2_action_7_yes_no] = '1'</p>    | <p>C. How feasible was it to promote bundle-related network weaving?</p>                                                                                                                                                                                | <p>radio, Required</p> <table border="1"> <tr><td>1</td><td>1 = Not at all feasible</td></tr> <tr><td>2</td><td>2 = Somewhat feasible</td></tr> <tr><td>3</td><td>3 = Moderately feasible</td></tr> <tr><td>4</td><td>4 = Very feasible</td></tr> <tr><td>5</td><td>5 = Extremely feasible</td></tr> </table>           | 1 | 1 = Not at all feasible   | 2 | 2 = Somewhat feasible   | 3 | 3 = Moderately feasible   | 4 | 4 = Very feasible   | 5 | 5 = Extremely feasible   |
| 1   | 1 = Not at all feasible                                                                             |                                                                                                                                                                                                                                                         |                                                                                                                                                                                                                                                                                                                         |   |                           |   |                         |   |                           |   |                     |   |                          |
| 2   | 2 = Somewhat feasible                                                                               |                                                                                                                                                                                                                                                         |                                                                                                                                                                                                                                                                                                                         |   |                           |   |                         |   |                           |   |                     |   |                          |
| 3   | 3 = Moderately feasible                                                                             |                                                                                                                                                                                                                                                         |                                                                                                                                                                                                                                                                                                                         |   |                           |   |                         |   |                           |   |                     |   |                          |
| 4   | 4 = Very feasible                                                                                   |                                                                                                                                                                                                                                                         |                                                                                                                                                                                                                                                                                                                         |   |                           |   |                         |   |                           |   |                     |   |                          |
| 5   | 5 = Extremely feasible                                                                              |                                                                                                                                                                                                                                                         |                                                                                                                                                                                                                                                                                                                         |   |                           |   |                         |   |                           |   |                     |   |                          |
| 115 | <p>section_2_action_7_d</p> <p>Show the field ONLY if:<br/>[section_2_action_7_yes_no] = '1'</p>    | <p>D. How costly (in terms of staff time, equipment, and other) was promoting bundle-related network weaving?</p>                                                                                                                                       | <p>radio, Required</p> <table border="1"> <tr><td>1</td><td>1 =Not at all costly</td></tr> <tr><td>2</td><td>2 = Somewhat costly</td></tr> <tr><td>3</td><td>3 = Moderately costly</td></tr> <tr><td>4</td><td>4 = Very costly</td></tr> <tr><td>5</td><td>5 = Extremely costly</td></tr> </table>                      | 1 | 1 =Not at all costly      | 2 | 2 = Somewhat costly     | 3 | 3 = Moderately costly     | 4 | 4 = Very costly     | 5 | 5 = Extremely costly     |
| 1   | 1 =Not at all costly                                                                                |                                                                                                                                                                                                                                                         |                                                                                                                                                                                                                                                                                                                         |   |                           |   |                         |   |                           |   |                     |   |                          |
| 2   | 2 = Somewhat costly                                                                                 |                                                                                                                                                                                                                                                         |                                                                                                                                                                                                                                                                                                                         |   |                           |   |                         |   |                           |   |                     |   |                          |
| 3   | 3 = Moderately costly                                                                               |                                                                                                                                                                                                                                                         |                                                                                                                                                                                                                                                                                                                         |   |                           |   |                         |   |                           |   |                     |   |                          |
| 4   | 4 = Very costly                                                                                     |                                                                                                                                                                                                                                                         |                                                                                                                                                                                                                                                                                                                         |   |                           |   |                         |   |                           |   |                     |   |                          |
| 5   | 5 = Extremely costly                                                                                |                                                                                                                                                                                                                                                         |                                                                                                                                                                                                                                                                                                                         |   |                           |   |                         |   |                           |   |                     |   |                          |
| 116 | <p>section_2_action_8_yes_no</p>                                                                    | <p>Action 8: Model and simulate change</p> <p>Q: Did your institution model or simulate the change that will be implemented with the ABCDEF bundle prior to implementation?</p> <p>If action not used, mark "No" and go to next reflection question</p> | <p>yesno, Required</p> <table border="1"> <tr><td>1</td><td>Yes</td></tr> <tr><td>0</td><td>No</td></tr> </table> <p>Custom alignment: RH</p>                                                                                                                                                                           | 1 | Yes                       | 0 | No                      |   |                           |   |                     |   |                          |
| 1   | Yes                                                                                                 |                                                                                                                                                                                                                                                         |                                                                                                                                                                                                                                                                                                                         |   |                           |   |                         |   |                           |   |                     |   |                          |
| 0   | No                                                                                                  |                                                                                                                                                                                                                                                         |                                                                                                                                                                                                                                                                                                                         |   |                           |   |                         |   |                           |   |                     |   |                          |
| 117 | <p>section_2_action_8_text</p> <p>Show the field ONLY if:<br/>[section_2_action_8_yes_no] = '1'</p> | <p>When reflecting on your ICU's ABCDEF bundle implementation efforts:</p>                                                                                                                                                                              | <p>descriptive</p>                                                                                                                                                                                                                                                                                                      |   |                           |   |                         |   |                           |   |                     |   |                          |
| 118 | <p>section_2_action_8_a</p> <p>Show the field ONLY if:<br/>[section_2_action_8_yes_no] = '1'</p>    | <p>A. How helpful was modeling and simulating change for increasing bundle adoption?</p>                                                                                                                                                                | <p>radio, Required</p> <table border="1"> <tr><td>1</td><td>1 = Not at all helpful</td></tr> <tr><td>2</td><td>2 = Somewhat helpful</td></tr> <tr><td>3</td><td>3 = Moderately helpful</td></tr> <tr><td>4</td><td>4 = Very helpful</td></tr> <tr><td>5</td><td>5 = Extremely helpful</td></tr> </table>                | 1 | 1 = Not at all helpful    | 2 | 2 = Somewhat helpful    | 3 | 3 = Moderately helpful    | 4 | 4 = Very helpful    | 5 | 5 = Extremely helpful    |
| 1   | 1 = Not at all helpful                                                                              |                                                                                                                                                                                                                                                         |                                                                                                                                                                                                                                                                                                                         |   |                           |   |                         |   |                           |   |                     |   |                          |
| 2   | 2 = Somewhat helpful                                                                                |                                                                                                                                                                                                                                                         |                                                                                                                                                                                                                                                                                                                         |   |                           |   |                         |   |                           |   |                     |   |                          |
| 3   | 3 = Moderately helpful                                                                              |                                                                                                                                                                                                                                                         |                                                                                                                                                                                                                                                                                                                         |   |                           |   |                         |   |                           |   |                     |   |                          |
| 4   | 4 = Very helpful                                                                                    |                                                                                                                                                                                                                                                         |                                                                                                                                                                                                                                                                                                                         |   |                           |   |                         |   |                           |   |                     |   |                          |
| 5   | 5 = Extremely helpful                                                                               |                                                                                                                                                                                                                                                         |                                                                                                                                                                                                                                                                                                                         |   |                           |   |                         |   |                           |   |                     |   |                          |
| 119 | <p>section_2_action_8_b</p> <p>Show the field ONLY if:<br/>[section_2_action_8_yes_no] = '1'</p>    | <p>B. How acceptable was modeling and simulating bundle-related change among ICU team members?</p>                                                                                                                                                      | <p>radio, Required</p> <table border="1"> <tr><td>1</td><td>1 = Not at all acceptable</td></tr> <tr><td>2</td><td>2 = Somewhat acceptable</td></tr> <tr><td>3</td><td>3 = Moderately acceptable</td></tr> <tr><td>4</td><td>4 = Very acceptable</td></tr> <tr><td>5</td><td>5 = Extremely acceptable</td></tr> </table> | 1 | 1 = Not at all acceptable | 2 | 2 = Somewhat acceptable | 3 | 3 = Moderately acceptable | 4 | 4 = Very acceptable | 5 | 5 = Extremely acceptable |
| 1   | 1 = Not at all acceptable                                                                           |                                                                                                                                                                                                                                                         |                                                                                                                                                                                                                                                                                                                         |   |                           |   |                         |   |                           |   |                     |   |                          |
| 2   | 2 = Somewhat acceptable                                                                             |                                                                                                                                                                                                                                                         |                                                                                                                                                                                                                                                                                                                         |   |                           |   |                         |   |                           |   |                     |   |                          |
| 3   | 3 = Moderately acceptable                                                                           |                                                                                                                                                                                                                                                         |                                                                                                                                                                                                                                                                                                                         |   |                           |   |                         |   |                           |   |                     |   |                          |
| 4   | 4 = Very acceptable                                                                                 |                                                                                                                                                                                                                                                         |                                                                                                                                                                                                                                                                                                                         |   |                           |   |                         |   |                           |   |                     |   |                          |
| 5   | 5 = Extremely acceptable                                                                            |                                                                                                                                                                                                                                                         |                                                                                                                                                                                                                                                                                                                         |   |                           |   |                         |   |                           |   |                     |   |                          |
| 120 | <p>section_2_action_8_c</p> <p>Show the field ONLY if:<br/>[section_2_action_8_yes_no] = '1'</p>    | <p>C. How feasible was it to model and simulate bundle-related change?</p>                                                                                                                                                                              | <p>radio, Required</p> <table border="1"> <tr><td>1</td><td>1 = Not at all feasible</td></tr> <tr><td>2</td><td>2 = Somewhat feasible</td></tr> <tr><td>3</td><td>3 = Moderately feasible</td></tr> <tr><td>4</td><td>4 = Very feasible</td></tr> <tr><td>5</td><td>5 = Extremely feasible</td></tr> </table>           | 1 | 1 = Not at all feasible   | 2 | 2 = Somewhat feasible   | 3 | 3 = Moderately feasible   | 4 | 4 = Very feasible   | 5 | 5 = Extremely feasible   |
| 1   | 1 = Not at all feasible                                                                             |                                                                                                                                                                                                                                                         |                                                                                                                                                                                                                                                                                                                         |   |                           |   |                         |   |                           |   |                     |   |                          |
| 2   | 2 = Somewhat feasible                                                                               |                                                                                                                                                                                                                                                         |                                                                                                                                                                                                                                                                                                                         |   |                           |   |                         |   |                           |   |                     |   |                          |
| 3   | 3 = Moderately feasible                                                                             |                                                                                                                                                                                                                                                         |                                                                                                                                                                                                                                                                                                                         |   |                           |   |                         |   |                           |   |                     |   |                          |
| 4   | 4 = Very feasible                                                                                   |                                                                                                                                                                                                                                                         |                                                                                                                                                                                                                                                                                                                         |   |                           |   |                         |   |                           |   |                     |   |                          |
| 5   | 5 = Extremely feasible                                                                              |                                                                                                                                                                                                                                                         |                                                                                                                                                                                                                                                                                                                         |   |                           |   |                         |   |                           |   |                     |   |                          |

|     |                                                                                                       |                                                                                                                                                                                                                                                                                                                                       |                                                                                                                                                                                                                                                                                                                         |   |                           |   |                         |   |                           |   |                     |   |                          |
|-----|-------------------------------------------------------------------------------------------------------|---------------------------------------------------------------------------------------------------------------------------------------------------------------------------------------------------------------------------------------------------------------------------------------------------------------------------------------|-------------------------------------------------------------------------------------------------------------------------------------------------------------------------------------------------------------------------------------------------------------------------------------------------------------------------|---|---------------------------|---|-------------------------|---|---------------------------|---|---------------------|---|--------------------------|
| 121 | <p>section_2_action_8_d</p> <p>Show the field ONLY if:<br/>[section_2_action_8_yes_no] = '1'</p>      | <p>D. How costly (in terms of staff time, equipment, and other) was modeling and simulating bundle-related change?</p>                                                                                                                                                                                                                | <p>radio, Required</p> <table border="1"> <tr><td>1</td><td>1 = Not at all costly</td></tr> <tr><td>2</td><td>2 = Somewhat costly</td></tr> <tr><td>3</td><td>3 = Moderately costly</td></tr> <tr><td>4</td><td>4 = Very costly</td></tr> <tr><td>5</td><td>5 = Extremely costly</td></tr> </table>                     | 1 | 1 = Not at all costly     | 2 | 2 = Somewhat costly     | 3 | 3 = Moderately costly     | 4 | 4 = Very costly     | 5 | 5 = Extremely costly     |
| 1   | 1 = Not at all costly                                                                                 |                                                                                                                                                                                                                                                                                                                                       |                                                                                                                                                                                                                                                                                                                         |   |                           |   |                         |   |                           |   |                     |   |                          |
| 2   | 2 = Somewhat costly                                                                                   |                                                                                                                                                                                                                                                                                                                                       |                                                                                                                                                                                                                                                                                                                         |   |                           |   |                         |   |                           |   |                     |   |                          |
| 3   | 3 = Moderately costly                                                                                 |                                                                                                                                                                                                                                                                                                                                       |                                                                                                                                                                                                                                                                                                                         |   |                           |   |                         |   |                           |   |                     |   |                          |
| 4   | 4 = Very costly                                                                                       |                                                                                                                                                                                                                                                                                                                                       |                                                                                                                                                                                                                                                                                                                         |   |                           |   |                         |   |                           |   |                     |   |                          |
| 5   | 5 = Extremely costly                                                                                  |                                                                                                                                                                                                                                                                                                                                       |                                                                                                                                                                                                                                                                                                                         |   |                           |   |                         |   |                           |   |                     |   |                          |
| 122 | <p>section_2_action_9_yes_no</p>                                                                      | <p>Action 9: Capture and share local knowledge</p> <p>Q: Did your institution capture local knowledge from implementation sites on how ABCDEF bundle implementers and clinicians made something work in their setting and then share it with other sites?</p> <p>If action not used, mark "No" and go to next reflection question</p> | <p>yesno, Required</p> <table border="1"> <tr><td>1</td><td>Yes</td></tr> <tr><td>0</td><td>No</td></tr> </table> <p>Custom alignment: RH</p>                                                                                                                                                                           | 1 | Yes                       | 0 | No                      |   |                           |   |                     |   |                          |
| 1   | Yes                                                                                                   |                                                                                                                                                                                                                                                                                                                                       |                                                                                                                                                                                                                                                                                                                         |   |                           |   |                         |   |                           |   |                     |   |                          |
| 0   | No                                                                                                    |                                                                                                                                                                                                                                                                                                                                       |                                                                                                                                                                                                                                                                                                                         |   |                           |   |                         |   |                           |   |                     |   |                          |
| 123 | <p>section_2_action_9_text</p> <p>Show the field ONLY if:<br/>[section_2_action_9_yes_no] = '1'</p>   | <p>When reflecting on your ICU's ABCDEF bundle implementation efforts:</p>                                                                                                                                                                                                                                                            | <p>descriptive</p>                                                                                                                                                                                                                                                                                                      |   |                           |   |                         |   |                           |   |                     |   |                          |
| 124 | <p>section_2_action_9_a</p> <p>Show the field ONLY if:<br/>[section_2_action_9_yes_no] = '1'</p>      | <p>A. How helpful was capturing and sharing local knowledge for increasing bundle adoption?</p>                                                                                                                                                                                                                                       | <p>radio, Required</p> <table border="1"> <tr><td>1</td><td>1 = Not at all helpful</td></tr> <tr><td>2</td><td>2 = Somewhat helpful</td></tr> <tr><td>3</td><td>3 = Moderately helpful</td></tr> <tr><td>4</td><td>4 = Very helpful</td></tr> <tr><td>5</td><td>5 = Extremely helpful</td></tr> </table>                | 1 | 1 = Not at all helpful    | 2 | 2 = Somewhat helpful    | 3 | 3 = Moderately helpful    | 4 | 4 = Very helpful    | 5 | 5 = Extremely helpful    |
| 1   | 1 = Not at all helpful                                                                                |                                                                                                                                                                                                                                                                                                                                       |                                                                                                                                                                                                                                                                                                                         |   |                           |   |                         |   |                           |   |                     |   |                          |
| 2   | 2 = Somewhat helpful                                                                                  |                                                                                                                                                                                                                                                                                                                                       |                                                                                                                                                                                                                                                                                                                         |   |                           |   |                         |   |                           |   |                     |   |                          |
| 3   | 3 = Moderately helpful                                                                                |                                                                                                                                                                                                                                                                                                                                       |                                                                                                                                                                                                                                                                                                                         |   |                           |   |                         |   |                           |   |                     |   |                          |
| 4   | 4 = Very helpful                                                                                      |                                                                                                                                                                                                                                                                                                                                       |                                                                                                                                                                                                                                                                                                                         |   |                           |   |                         |   |                           |   |                     |   |                          |
| 5   | 5 = Extremely helpful                                                                                 |                                                                                                                                                                                                                                                                                                                                       |                                                                                                                                                                                                                                                                                                                         |   |                           |   |                         |   |                           |   |                     |   |                          |
| 125 | <p>section_2_action_9_b</p> <p>Show the field ONLY if:<br/>[section_2_action_9_yes_no] = '1'</p>      | <p>B. How acceptable was capturing and sharing local bundle-related knowledge among ICU team members?</p>                                                                                                                                                                                                                             | <p>radio, Required</p> <table border="1"> <tr><td>1</td><td>1 = Not at all acceptable</td></tr> <tr><td>2</td><td>2 = Somewhat acceptable</td></tr> <tr><td>3</td><td>3 = Moderately acceptable</td></tr> <tr><td>4</td><td>4 = Very acceptable</td></tr> <tr><td>5</td><td>5 = Extremely acceptable</td></tr> </table> | 1 | 1 = Not at all acceptable | 2 | 2 = Somewhat acceptable | 3 | 3 = Moderately acceptable | 4 | 4 = Very acceptable | 5 | 5 = Extremely acceptable |
| 1   | 1 = Not at all acceptable                                                                             |                                                                                                                                                                                                                                                                                                                                       |                                                                                                                                                                                                                                                                                                                         |   |                           |   |                         |   |                           |   |                     |   |                          |
| 2   | 2 = Somewhat acceptable                                                                               |                                                                                                                                                                                                                                                                                                                                       |                                                                                                                                                                                                                                                                                                                         |   |                           |   |                         |   |                           |   |                     |   |                          |
| 3   | 3 = Moderately acceptable                                                                             |                                                                                                                                                                                                                                                                                                                                       |                                                                                                                                                                                                                                                                                                                         |   |                           |   |                         |   |                           |   |                     |   |                          |
| 4   | 4 = Very acceptable                                                                                   |                                                                                                                                                                                                                                                                                                                                       |                                                                                                                                                                                                                                                                                                                         |   |                           |   |                         |   |                           |   |                     |   |                          |
| 5   | 5 = Extremely acceptable                                                                              |                                                                                                                                                                                                                                                                                                                                       |                                                                                                                                                                                                                                                                                                                         |   |                           |   |                         |   |                           |   |                     |   |                          |
| 126 | <p>section_2_action_9_c</p> <p>Show the field ONLY if:<br/>[section_2_action_9_yes_no] = '1'</p>      | <p>C. How feasible was it to capture and share local bundle-related knowledge?</p>                                                                                                                                                                                                                                                    | <p>radio, Required</p> <table border="1"> <tr><td>1</td><td>1 = Not at all feasible</td></tr> <tr><td>2</td><td>2 = Somewhat feasible</td></tr> <tr><td>3</td><td>3 = Moderately feasible</td></tr> <tr><td>4</td><td>4 = Very feasible</td></tr> <tr><td>5</td><td>5 = Extremely feasible</td></tr> </table>           | 1 | 1 = Not at all feasible   | 2 | 2 = Somewhat feasible   | 3 | 3 = Moderately feasible   | 4 | 4 = Very feasible   | 5 | 5 = Extremely feasible   |
| 1   | 1 = Not at all feasible                                                                               |                                                                                                                                                                                                                                                                                                                                       |                                                                                                                                                                                                                                                                                                                         |   |                           |   |                         |   |                           |   |                     |   |                          |
| 2   | 2 = Somewhat feasible                                                                                 |                                                                                                                                                                                                                                                                                                                                       |                                                                                                                                                                                                                                                                                                                         |   |                           |   |                         |   |                           |   |                     |   |                          |
| 3   | 3 = Moderately feasible                                                                               |                                                                                                                                                                                                                                                                                                                                       |                                                                                                                                                                                                                                                                                                                         |   |                           |   |                         |   |                           |   |                     |   |                          |
| 4   | 4 = Very feasible                                                                                     |                                                                                                                                                                                                                                                                                                                                       |                                                                                                                                                                                                                                                                                                                         |   |                           |   |                         |   |                           |   |                     |   |                          |
| 5   | 5 = Extremely feasible                                                                                |                                                                                                                                                                                                                                                                                                                                       |                                                                                                                                                                                                                                                                                                                         |   |                           |   |                         |   |                           |   |                     |   |                          |
| 127 | <p>section_2_action_9_d</p> <p>Show the field ONLY if:<br/>[section_2_action_9_yes_no] = '1'</p>      | <p>D. How costly (in terms of staff time, equipment, and other) was capturing and sharing local bundle-related knowledge?</p>                                                                                                                                                                                                         | <p>radio, Required</p> <table border="1"> <tr><td>1</td><td>1 = Not at all costly</td></tr> <tr><td>2</td><td>2 = Somewhat costly</td></tr> <tr><td>3</td><td>3 = Moderately costly</td></tr> <tr><td>4</td><td>4 = Very costly</td></tr> <tr><td>5</td><td>5 = Extremely costly</td></tr> </table>                     | 1 | 1 = Not at all costly     | 2 | 2 = Somewhat costly     | 3 | 3 = Moderately costly     | 4 | 4 = Very costly     | 5 | 5 = Extremely costly     |
| 1   | 1 = Not at all costly                                                                                 |                                                                                                                                                                                                                                                                                                                                       |                                                                                                                                                                                                                                                                                                                         |   |                           |   |                         |   |                           |   |                     |   |                          |
| 2   | 2 = Somewhat costly                                                                                   |                                                                                                                                                                                                                                                                                                                                       |                                                                                                                                                                                                                                                                                                                         |   |                           |   |                         |   |                           |   |                     |   |                          |
| 3   | 3 = Moderately costly                                                                                 |                                                                                                                                                                                                                                                                                                                                       |                                                                                                                                                                                                                                                                                                                         |   |                           |   |                         |   |                           |   |                     |   |                          |
| 4   | 4 = Very costly                                                                                       |                                                                                                                                                                                                                                                                                                                                       |                                                                                                                                                                                                                                                                                                                         |   |                           |   |                         |   |                           |   |                     |   |                          |
| 5   | 5 = Extremely costly                                                                                  |                                                                                                                                                                                                                                                                                                                                       |                                                                                                                                                                                                                                                                                                                         |   |                           |   |                         |   |                           |   |                     |   |                          |
| 128 | <p>section_2_action_10_yes_no</p>                                                                     | <p>Action 10: Obtain formal commitments</p> <p>Q: Did your institution obtain written commitments from key partners that state what they will do to implement the ABCDEF bundle?</p> <p>If action not used, mark "No" and go to next reflection question</p>                                                                          | <p>yesno, Required</p> <table border="1"> <tr><td>1</td><td>Yes</td></tr> <tr><td>0</td><td>No</td></tr> </table> <p>Custom alignment: RH</p>                                                                                                                                                                           | 1 | Yes                       | 0 | No                      |   |                           |   |                     |   |                          |
| 1   | Yes                                                                                                   |                                                                                                                                                                                                                                                                                                                                       |                                                                                                                                                                                                                                                                                                                         |   |                           |   |                         |   |                           |   |                     |   |                          |
| 0   | No                                                                                                    |                                                                                                                                                                                                                                                                                                                                       |                                                                                                                                                                                                                                                                                                                         |   |                           |   |                         |   |                           |   |                     |   |                          |
| 129 | <p>section_2_action_10_text</p> <p>Show the field ONLY if:<br/>[section_2_action_10_yes_no] = '1'</p> | <p>When reflecting on your ICU's ABCDEF bundle implementation efforts:</p>                                                                                                                                                                                                                                                            | <p>descriptive</p>                                                                                                                                                                                                                                                                                                      |   |                           |   |                         |   |                           |   |                     |   |                          |



|     |                                                                                                       |                                                                                                                                                                                                                                                                                                      |                                                                                                                                                                                                                                                                                                                         |   |                           |   |                         |   |                           |   |                     |   |                          |
|-----|-------------------------------------------------------------------------------------------------------|------------------------------------------------------------------------------------------------------------------------------------------------------------------------------------------------------------------------------------------------------------------------------------------------------|-------------------------------------------------------------------------------------------------------------------------------------------------------------------------------------------------------------------------------------------------------------------------------------------------------------------------|---|---------------------------|---|-------------------------|---|---------------------------|---|---------------------|---|--------------------------|
| 130 | <p>section_2_action_10_a</p> <p>Show the field ONLY if:<br/>[section_2_action_10_yes_no] = '1'</p>    | <p>A. How helpful was obtaining formal commitments for increasing bundle adoption?</p>                                                                                                                                                                                                               | <p>radio, Required</p> <table border="1"> <tr><td>1</td><td>1 = Not at all helpful</td></tr> <tr><td>2</td><td>2 = Somewhat helpful</td></tr> <tr><td>3</td><td>3 = Moderately helpful</td></tr> <tr><td>4</td><td>4 = Very helpful</td></tr> <tr><td>5</td><td>5 = Extremely helpful</td></tr> </table>                | 1 | 1 = Not at all helpful    | 2 | 2 = Somewhat helpful    | 3 | 3 = Moderately helpful    | 4 | 4 = Very helpful    | 5 | 5 = Extremely helpful    |
| 1   | 1 = Not at all helpful                                                                                |                                                                                                                                                                                                                                                                                                      |                                                                                                                                                                                                                                                                                                                         |   |                           |   |                         |   |                           |   |                     |   |                          |
| 2   | 2 = Somewhat helpful                                                                                  |                                                                                                                                                                                                                                                                                                      |                                                                                                                                                                                                                                                                                                                         |   |                           |   |                         |   |                           |   |                     |   |                          |
| 3   | 3 = Moderately helpful                                                                                |                                                                                                                                                                                                                                                                                                      |                                                                                                                                                                                                                                                                                                                         |   |                           |   |                         |   |                           |   |                     |   |                          |
| 4   | 4 = Very helpful                                                                                      |                                                                                                                                                                                                                                                                                                      |                                                                                                                                                                                                                                                                                                                         |   |                           |   |                         |   |                           |   |                     |   |                          |
| 5   | 5 = Extremely helpful                                                                                 |                                                                                                                                                                                                                                                                                                      |                                                                                                                                                                                                                                                                                                                         |   |                           |   |                         |   |                           |   |                     |   |                          |
| 131 | <p>section_2_action_10_b</p> <p>Show the field ONLY if:<br/>[section_2_action_10_yes_no] = '1'</p>    | <p>B. How acceptable was obtaining formal bundle-related commitments among ICU team members?</p>                                                                                                                                                                                                     | <p>radio, Required</p> <table border="1"> <tr><td>1</td><td>1 = Not at all acceptable</td></tr> <tr><td>2</td><td>2 = Somewhat acceptable</td></tr> <tr><td>3</td><td>3 = Moderately acceptable</td></tr> <tr><td>4</td><td>4 = Very acceptable</td></tr> <tr><td>5</td><td>5 = Extremely acceptable</td></tr> </table> | 1 | 1 = Not at all acceptable | 2 | 2 = Somewhat acceptable | 3 | 3 = Moderately acceptable | 4 | 4 = Very acceptable | 5 | 5 = Extremely acceptable |
| 1   | 1 = Not at all acceptable                                                                             |                                                                                                                                                                                                                                                                                                      |                                                                                                                                                                                                                                                                                                                         |   |                           |   |                         |   |                           |   |                     |   |                          |
| 2   | 2 = Somewhat acceptable                                                                               |                                                                                                                                                                                                                                                                                                      |                                                                                                                                                                                                                                                                                                                         |   |                           |   |                         |   |                           |   |                     |   |                          |
| 3   | 3 = Moderately acceptable                                                                             |                                                                                                                                                                                                                                                                                                      |                                                                                                                                                                                                                                                                                                                         |   |                           |   |                         |   |                           |   |                     |   |                          |
| 4   | 4 = Very acceptable                                                                                   |                                                                                                                                                                                                                                                                                                      |                                                                                                                                                                                                                                                                                                                         |   |                           |   |                         |   |                           |   |                     |   |                          |
| 5   | 5 = Extremely acceptable                                                                              |                                                                                                                                                                                                                                                                                                      |                                                                                                                                                                                                                                                                                                                         |   |                           |   |                         |   |                           |   |                     |   |                          |
| 132 | <p>section_2_action_10_c</p> <p>Show the field ONLY if:<br/>[section_2_action_10_yes_no] = '1'</p>    | <p>C. How feasible was it to obtain formal bundle-related commitments?</p>                                                                                                                                                                                                                           | <p>radio, Required</p> <table border="1"> <tr><td>1</td><td>1 = Not at all feasible</td></tr> <tr><td>2</td><td>2 = Somewhat feasible</td></tr> <tr><td>3</td><td>3 = Moderately feasible</td></tr> <tr><td>4</td><td>4 = Very feasible</td></tr> <tr><td>5</td><td>5 = Extremely feasible</td></tr> </table>           | 1 | 1 = Not at all feasible   | 2 | 2 = Somewhat feasible   | 3 | 3 = Moderately feasible   | 4 | 4 = Very feasible   | 5 | 5 = Extremely feasible   |
| 1   | 1 = Not at all feasible                                                                               |                                                                                                                                                                                                                                                                                                      |                                                                                                                                                                                                                                                                                                                         |   |                           |   |                         |   |                           |   |                     |   |                          |
| 2   | 2 = Somewhat feasible                                                                                 |                                                                                                                                                                                                                                                                                                      |                                                                                                                                                                                                                                                                                                                         |   |                           |   |                         |   |                           |   |                     |   |                          |
| 3   | 3 = Moderately feasible                                                                               |                                                                                                                                                                                                                                                                                                      |                                                                                                                                                                                                                                                                                                                         |   |                           |   |                         |   |                           |   |                     |   |                          |
| 4   | 4 = Very feasible                                                                                     |                                                                                                                                                                                                                                                                                                      |                                                                                                                                                                                                                                                                                                                         |   |                           |   |                         |   |                           |   |                     |   |                          |
| 5   | 5 = Extremely feasible                                                                                |                                                                                                                                                                                                                                                                                                      |                                                                                                                                                                                                                                                                                                                         |   |                           |   |                         |   |                           |   |                     |   |                          |
| 133 | <p>section_2_action_10_d</p> <p>Show the field ONLY if:<br/>[section_2_action_10_yes_no] = '1'</p>    | <p>D. How costly (in terms of staff time, equipment, and other) was obtaining formal bundle-related commitments?</p>                                                                                                                                                                                 | <p>radio, Required</p> <table border="1"> <tr><td>1</td><td>1 =Not at all costly</td></tr> <tr><td>2</td><td>2 = Somewhat costly</td></tr> <tr><td>3</td><td>3 = Moderately costly</td></tr> <tr><td>4</td><td>4 = Very costly</td></tr> <tr><td>5</td><td>5 = Extremely costly</td></tr> </table>                      | 1 | 1 =Not at all costly      | 2 | 2 = Somewhat costly     | 3 | 3 = Moderately costly     | 4 | 4 = Very costly     | 5 | 5 = Extremely costly     |
| 1   | 1 =Not at all costly                                                                                  |                                                                                                                                                                                                                                                                                                      |                                                                                                                                                                                                                                                                                                                         |   |                           |   |                         |   |                           |   |                     |   |                          |
| 2   | 2 = Somewhat costly                                                                                   |                                                                                                                                                                                                                                                                                                      |                                                                                                                                                                                                                                                                                                                         |   |                           |   |                         |   |                           |   |                     |   |                          |
| 3   | 3 = Moderately costly                                                                                 |                                                                                                                                                                                                                                                                                                      |                                                                                                                                                                                                                                                                                                                         |   |                           |   |                         |   |                           |   |                     |   |                          |
| 4   | 4 = Very costly                                                                                       |                                                                                                                                                                                                                                                                                                      |                                                                                                                                                                                                                                                                                                                         |   |                           |   |                         |   |                           |   |                     |   |                          |
| 5   | 5 = Extremely costly                                                                                  |                                                                                                                                                                                                                                                                                                      |                                                                                                                                                                                                                                                                                                                         |   |                           |   |                         |   |                           |   |                     |   |                          |
| 134 | <p>section_2_action_11_yes_no</p>                                                                     | <p>Action 11: Organize clinician implementation team meetings</p> <p>Q: Did your institution develop and support teams of clinicians who are implementing the ABCDEF bundle and give them protected time to reflect on the implementation effort, share lessons learned, and support one another</p> | <p>yesno, Required</p> <table border="1"> <tr><td>1</td><td>Yes</td></tr> <tr><td>0</td><td>No</td></tr> </table> <p>Custom alignment: RH</p>                                                                                                                                                                           | 1 | Yes                       | 0 | No                      |   |                           |   |                     |   |                          |
| 1   | Yes                                                                                                   |                                                                                                                                                                                                                                                                                                      |                                                                                                                                                                                                                                                                                                                         |   |                           |   |                         |   |                           |   |                     |   |                          |
| 0   | No                                                                                                    |                                                                                                                                                                                                                                                                                                      |                                                                                                                                                                                                                                                                                                                         |   |                           |   |                         |   |                           |   |                     |   |                          |
| 135 | <p>section_2_action_11_text</p> <p>Show the field ONLY if:<br/>[section_2_action_11_yes_no] = '1'</p> | <p>When reflecting on your ICU's ABCDEF bundle implementation efforts:</p>                                                                                                                                                                                                                           | <p>descriptive</p>                                                                                                                                                                                                                                                                                                      |   |                           |   |                         |   |                           |   |                     |   |                          |
| 136 | <p>section_2_action_11_a</p> <p>Show the field ONLY if:<br/>[section_2_action_11_yes_no] = '1'</p>    | <p>A. How helpful was organizing clinician implementation team meetings for increasing bundle adoption?</p>                                                                                                                                                                                          | <p>radio, Required</p> <table border="1"> <tr><td>1</td><td>1 = Not at all helpful</td></tr> <tr><td>2</td><td>2 = Somewhat helpful</td></tr> <tr><td>3</td><td>3 = Moderately helpful</td></tr> <tr><td>4</td><td>4 = Very helpful</td></tr> <tr><td>5</td><td>5 = Extremely helpful</td></tr> </table>                | 1 | 1 = Not at all helpful    | 2 | 2 = Somewhat helpful    | 3 | 3 = Moderately helpful    | 4 | 4 = Very helpful    | 5 | 5 = Extremely helpful    |
| 1   | 1 = Not at all helpful                                                                                |                                                                                                                                                                                                                                                                                                      |                                                                                                                                                                                                                                                                                                                         |   |                           |   |                         |   |                           |   |                     |   |                          |
| 2   | 2 = Somewhat helpful                                                                                  |                                                                                                                                                                                                                                                                                                      |                                                                                                                                                                                                                                                                                                                         |   |                           |   |                         |   |                           |   |                     |   |                          |
| 3   | 3 = Moderately helpful                                                                                |                                                                                                                                                                                                                                                                                                      |                                                                                                                                                                                                                                                                                                                         |   |                           |   |                         |   |                           |   |                     |   |                          |
| 4   | 4 = Very helpful                                                                                      |                                                                                                                                                                                                                                                                                                      |                                                                                                                                                                                                                                                                                                                         |   |                           |   |                         |   |                           |   |                     |   |                          |
| 5   | 5 = Extremely helpful                                                                                 |                                                                                                                                                                                                                                                                                                      |                                                                                                                                                                                                                                                                                                                         |   |                           |   |                         |   |                           |   |                     |   |                          |
| 137 | <p>section_2_action_11_b</p> <p>Show the field ONLY if:<br/>[section_2_action_11_yes_no] = '1'</p>    | <p>B. How acceptable was organizing bundle-related clinician implementation team meetings among ICU team members?</p>                                                                                                                                                                                | <p>radio, Required</p> <table border="1"> <tr><td>1</td><td>1 = Not at all acceptable</td></tr> <tr><td>2</td><td>2 = Somewhat acceptable</td></tr> <tr><td>3</td><td>3 = Moderately acceptable</td></tr> <tr><td>4</td><td>4 = Very acceptable</td></tr> <tr><td>5</td><td>5 = Extremely acceptable</td></tr> </table> | 1 | 1 = Not at all acceptable | 2 | 2 = Somewhat acceptable | 3 | 3 = Moderately acceptable | 4 | 4 = Very acceptable | 5 | 5 = Extremely acceptable |
| 1   | 1 = Not at all acceptable                                                                             |                                                                                                                                                                                                                                                                                                      |                                                                                                                                                                                                                                                                                                                         |   |                           |   |                         |   |                           |   |                     |   |                          |
| 2   | 2 = Somewhat acceptable                                                                               |                                                                                                                                                                                                                                                                                                      |                                                                                                                                                                                                                                                                                                                         |   |                           |   |                         |   |                           |   |                     |   |                          |
| 3   | 3 = Moderately acceptable                                                                             |                                                                                                                                                                                                                                                                                                      |                                                                                                                                                                                                                                                                                                                         |   |                           |   |                         |   |                           |   |                     |   |                          |
| 4   | 4 = Very acceptable                                                                                   |                                                                                                                                                                                                                                                                                                      |                                                                                                                                                                                                                                                                                                                         |   |                           |   |                         |   |                           |   |                     |   |                          |
| 5   | 5 = Extremely acceptable                                                                              |                                                                                                                                                                                                                                                                                                      |                                                                                                                                                                                                                                                                                                                         |   |                           |   |                         |   |                           |   |                     |   |                          |
| 138 | <p>section_2_action_11_c</p> <p>Show the field ONLY if:<br/>[section_2_action_11_yes_no] = '1'</p>    | <p>C. How feasible was it to organize bundle-related clinician implementation team meetings?</p>                                                                                                                                                                                                     | <p>radio, Required</p> <table border="1"> <tr><td>1</td><td>1 = Not at all feasible</td></tr> <tr><td>2</td><td>2 = Somewhat feasible</td></tr> <tr><td>3</td><td>3 = Moderately feasible</td></tr> <tr><td>4</td><td>4 = Very feasible</td></tr> <tr><td>5</td><td>5 = Extremely feasible</td></tr> </table>           | 1 | 1 = Not at all feasible   | 2 | 2 = Somewhat feasible   | 3 | 3 = Moderately feasible   | 4 | 4 = Very feasible   | 5 | 5 = Extremely feasible   |
| 1   | 1 = Not at all feasible                                                                               |                                                                                                                                                                                                                                                                                                      |                                                                                                                                                                                                                                                                                                                         |   |                           |   |                         |   |                           |   |                     |   |                          |
| 2   | 2 = Somewhat feasible                                                                                 |                                                                                                                                                                                                                                                                                                      |                                                                                                                                                                                                                                                                                                                         |   |                           |   |                         |   |                           |   |                     |   |                          |
| 3   | 3 = Moderately feasible                                                                               |                                                                                                                                                                                                                                                                                                      |                                                                                                                                                                                                                                                                                                                         |   |                           |   |                         |   |                           |   |                     |   |                          |
| 4   | 4 = Very feasible                                                                                     |                                                                                                                                                                                                                                                                                                      |                                                                                                                                                                                                                                                                                                                         |   |                           |   |                         |   |                           |   |                     |   |                          |
| 5   | 5 = Extremely feasible                                                                                |                                                                                                                                                                                                                                                                                                      |                                                                                                                                                                                                                                                                                                                         |   |                           |   |                         |   |                           |   |                     |   |                          |

|     |                                                                                                       |                                                                                                                                                                                                                                                                                                                                                                                    |                                                                                                                                                                                                                                                                                                                         |   |                           |   |                         |   |                           |   |                     |   |                          |
|-----|-------------------------------------------------------------------------------------------------------|------------------------------------------------------------------------------------------------------------------------------------------------------------------------------------------------------------------------------------------------------------------------------------------------------------------------------------------------------------------------------------|-------------------------------------------------------------------------------------------------------------------------------------------------------------------------------------------------------------------------------------------------------------------------------------------------------------------------|---|---------------------------|---|-------------------------|---|---------------------------|---|---------------------|---|--------------------------|
| 139 | <p>section_2_action_11_d</p> <p>Show the field ONLY if:<br/>[section_2_action_11_yes_no] = '1'</p>    | <p>D. How costly (in terms of staff time, equipment, and other) was organizing bundle-related clinician implementation team meetings?</p>                                                                                                                                                                                                                                          | <p>radio, Required</p> <table border="1"> <tr><td>1</td><td>1 = Not at all costly</td></tr> <tr><td>2</td><td>2 = Somewhat costly</td></tr> <tr><td>3</td><td>3 = Moderately costly</td></tr> <tr><td>4</td><td>4 = Very costly</td></tr> <tr><td>5</td><td>5 = Extremely costly</td></tr> </table>                     | 1 | 1 = Not at all costly     | 2 | 2 = Somewhat costly     | 3 | 3 = Moderately costly     | 4 | 4 = Very costly     | 5 | 5 = Extremely costly     |
| 1   | 1 = Not at all costly                                                                                 |                                                                                                                                                                                                                                                                                                                                                                                    |                                                                                                                                                                                                                                                                                                                         |   |                           |   |                         |   |                           |   |                     |   |                          |
| 2   | 2 = Somewhat costly                                                                                   |                                                                                                                                                                                                                                                                                                                                                                                    |                                                                                                                                                                                                                                                                                                                         |   |                           |   |                         |   |                           |   |                     |   |                          |
| 3   | 3 = Moderately costly                                                                                 |                                                                                                                                                                                                                                                                                                                                                                                    |                                                                                                                                                                                                                                                                                                                         |   |                           |   |                         |   |                           |   |                     |   |                          |
| 4   | 4 = Very costly                                                                                       |                                                                                                                                                                                                                                                                                                                                                                                    |                                                                                                                                                                                                                                                                                                                         |   |                           |   |                         |   |                           |   |                     |   |                          |
| 5   | 5 = Extremely costly                                                                                  |                                                                                                                                                                                                                                                                                                                                                                                    |                                                                                                                                                                                                                                                                                                                         |   |                           |   |                         |   |                           |   |                     |   |                          |
| 140 | <p>section_2_action_12_yes_no</p>                                                                     | <p>Action 12: Identify early adopters</p> <p>Q: Did your institution identify early adopters at the local site to learn from their experiences with the ABCDEF bundle?</p> <p>If action not used, mark "No" and go to next reflection question</p>                                                                                                                                 | <p>yesno, Required</p> <table border="1"> <tr><td>1</td><td>Yes</td></tr> <tr><td>0</td><td>No</td></tr> </table> <p>Custom alignment: RH</p>                                                                                                                                                                           | 1 | Yes                       | 0 | No                      |   |                           |   |                     |   |                          |
| 1   | Yes                                                                                                   |                                                                                                                                                                                                                                                                                                                                                                                    |                                                                                                                                                                                                                                                                                                                         |   |                           |   |                         |   |                           |   |                     |   |                          |
| 0   | No                                                                                                    |                                                                                                                                                                                                                                                                                                                                                                                    |                                                                                                                                                                                                                                                                                                                         |   |                           |   |                         |   |                           |   |                     |   |                          |
| 141 | <p>section_2_action_12_text</p> <p>Show the field ONLY if:<br/>[section_2_action_12_yes_no] = '1'</p> | <p>When reflecting on your ICU's ABCDEF bundle implementation efforts:</p>                                                                                                                                                                                                                                                                                                         | <p>descriptive</p>                                                                                                                                                                                                                                                                                                      |   |                           |   |                         |   |                           |   |                     |   |                          |
| 142 | <p>section_2_action_12_a</p> <p>Show the field ONLY if:<br/>[section_2_action_12_yes_no] = '1'</p>    | <p>A. How helpful was identifying early adopters for increasing bundle adoption?</p>                                                                                                                                                                                                                                                                                               | <p>radio, Required</p> <table border="1"> <tr><td>1</td><td>1 = Not at all helpful</td></tr> <tr><td>2</td><td>2 = Somewhat helpful</td></tr> <tr><td>3</td><td>3 = Moderately helpful</td></tr> <tr><td>4</td><td>4 = Very helpful</td></tr> <tr><td>5</td><td>5 = Extremely helpful</td></tr> </table>                | 1 | 1 = Not at all helpful    | 2 | 2 = Somewhat helpful    | 3 | 3 = Moderately helpful    | 4 | 4 = Very helpful    | 5 | 5 = Extremely helpful    |
| 1   | 1 = Not at all helpful                                                                                |                                                                                                                                                                                                                                                                                                                                                                                    |                                                                                                                                                                                                                                                                                                                         |   |                           |   |                         |   |                           |   |                     |   |                          |
| 2   | 2 = Somewhat helpful                                                                                  |                                                                                                                                                                                                                                                                                                                                                                                    |                                                                                                                                                                                                                                                                                                                         |   |                           |   |                         |   |                           |   |                     |   |                          |
| 3   | 3 = Moderately helpful                                                                                |                                                                                                                                                                                                                                                                                                                                                                                    |                                                                                                                                                                                                                                                                                                                         |   |                           |   |                         |   |                           |   |                     |   |                          |
| 4   | 4 = Very helpful                                                                                      |                                                                                                                                                                                                                                                                                                                                                                                    |                                                                                                                                                                                                                                                                                                                         |   |                           |   |                         |   |                           |   |                     |   |                          |
| 5   | 5 = Extremely helpful                                                                                 |                                                                                                                                                                                                                                                                                                                                                                                    |                                                                                                                                                                                                                                                                                                                         |   |                           |   |                         |   |                           |   |                     |   |                          |
| 143 | <p>section_2_action_12_b</p> <p>Show the field ONLY if:<br/>[section_2_action_12_yes_no] = '1'</p>    | <p>B. How acceptable was identifying early bundle adopters among ICU team members?</p>                                                                                                                                                                                                                                                                                             | <p>radio, Required</p> <table border="1"> <tr><td>1</td><td>1 = Not at all acceptable</td></tr> <tr><td>2</td><td>2 = Somewhat acceptable</td></tr> <tr><td>3</td><td>3 = Moderately acceptable</td></tr> <tr><td>4</td><td>4 = Very acceptable</td></tr> <tr><td>5</td><td>5 = Extremely acceptable</td></tr> </table> | 1 | 1 = Not at all acceptable | 2 | 2 = Somewhat acceptable | 3 | 3 = Moderately acceptable | 4 | 4 = Very acceptable | 5 | 5 = Extremely acceptable |
| 1   | 1 = Not at all acceptable                                                                             |                                                                                                                                                                                                                                                                                                                                                                                    |                                                                                                                                                                                                                                                                                                                         |   |                           |   |                         |   |                           |   |                     |   |                          |
| 2   | 2 = Somewhat acceptable                                                                               |                                                                                                                                                                                                                                                                                                                                                                                    |                                                                                                                                                                                                                                                                                                                         |   |                           |   |                         |   |                           |   |                     |   |                          |
| 3   | 3 = Moderately acceptable                                                                             |                                                                                                                                                                                                                                                                                                                                                                                    |                                                                                                                                                                                                                                                                                                                         |   |                           |   |                         |   |                           |   |                     |   |                          |
| 4   | 4 = Very acceptable                                                                                   |                                                                                                                                                                                                                                                                                                                                                                                    |                                                                                                                                                                                                                                                                                                                         |   |                           |   |                         |   |                           |   |                     |   |                          |
| 5   | 5 = Extremely acceptable                                                                              |                                                                                                                                                                                                                                                                                                                                                                                    |                                                                                                                                                                                                                                                                                                                         |   |                           |   |                         |   |                           |   |                     |   |                          |
| 144 | <p>section_2_action_12_c</p> <p>Show the field ONLY if:<br/>[section_2_action_12_yes_no] = '1'</p>    | <p>C. How feasible was it to identify early bundle adopters?</p>                                                                                                                                                                                                                                                                                                                   | <p>radio, Required</p> <table border="1"> <tr><td>1</td><td>1 = Not at all feasible</td></tr> <tr><td>2</td><td>2 = Somewhat feasible</td></tr> <tr><td>3</td><td>3 = Moderately feasible</td></tr> <tr><td>4</td><td>4 = Very feasible</td></tr> <tr><td>5</td><td>5 = Extremely feasible</td></tr> </table>           | 1 | 1 = Not at all feasible   | 2 | 2 = Somewhat feasible   | 3 | 3 = Moderately feasible   | 4 | 4 = Very feasible   | 5 | 5 = Extremely feasible   |
| 1   | 1 = Not at all feasible                                                                               |                                                                                                                                                                                                                                                                                                                                                                                    |                                                                                                                                                                                                                                                                                                                         |   |                           |   |                         |   |                           |   |                     |   |                          |
| 2   | 2 = Somewhat feasible                                                                                 |                                                                                                                                                                                                                                                                                                                                                                                    |                                                                                                                                                                                                                                                                                                                         |   |                           |   |                         |   |                           |   |                     |   |                          |
| 3   | 3 = Moderately feasible                                                                               |                                                                                                                                                                                                                                                                                                                                                                                    |                                                                                                                                                                                                                                                                                                                         |   |                           |   |                         |   |                           |   |                     |   |                          |
| 4   | 4 = Very feasible                                                                                     |                                                                                                                                                                                                                                                                                                                                                                                    |                                                                                                                                                                                                                                                                                                                         |   |                           |   |                         |   |                           |   |                     |   |                          |
| 5   | 5 = Extremely feasible                                                                                |                                                                                                                                                                                                                                                                                                                                                                                    |                                                                                                                                                                                                                                                                                                                         |   |                           |   |                         |   |                           |   |                     |   |                          |
| 145 | <p>section_2_action_12_d</p> <p>Show the field ONLY if:<br/>[section_2_action_12_yes_no] = '1'</p>    | <p>D. How costly (in terms of staff time, equipment, and other) was identifying early bundle adopters?</p>                                                                                                                                                                                                                                                                         | <p>radio, Required</p> <table border="1"> <tr><td>1</td><td>1 = Not at all costly</td></tr> <tr><td>2</td><td>2 = Somewhat costly</td></tr> <tr><td>3</td><td>3 = Moderately costly</td></tr> <tr><td>4</td><td>4 = Very costly</td></tr> <tr><td>5</td><td>5 = Extremely costly</td></tr> </table>                     | 1 | 1 = Not at all costly     | 2 | 2 = Somewhat costly     | 3 | 3 = Moderately costly     | 4 | 4 = Very costly     | 5 | 5 = Extremely costly     |
| 1   | 1 = Not at all costly                                                                                 |                                                                                                                                                                                                                                                                                                                                                                                    |                                                                                                                                                                                                                                                                                                                         |   |                           |   |                         |   |                           |   |                     |   |                          |
| 2   | 2 = Somewhat costly                                                                                   |                                                                                                                                                                                                                                                                                                                                                                                    |                                                                                                                                                                                                                                                                                                                         |   |                           |   |                         |   |                           |   |                     |   |                          |
| 3   | 3 = Moderately costly                                                                                 |                                                                                                                                                                                                                                                                                                                                                                                    |                                                                                                                                                                                                                                                                                                                         |   |                           |   |                         |   |                           |   |                     |   |                          |
| 4   | 4 = Very costly                                                                                       |                                                                                                                                                                                                                                                                                                                                                                                    |                                                                                                                                                                                                                                                                                                                         |   |                           |   |                         |   |                           |   |                     |   |                          |
| 5   | 5 = Extremely costly                                                                                  |                                                                                                                                                                                                                                                                                                                                                                                    |                                                                                                                                                                                                                                                                                                                         |   |                           |   |                         |   |                           |   |                     |   |                          |
| 146 | <p>section_2_action_13_yes_no</p>                                                                     | <p>Action 13: Identify and prepare champions</p> <p>Q: Did your institution identify and prepare individuals who dedicate themselves to supporting, marketing, and driving through ABCDEF bundle implementation, overcoming indifference or resistance that the bundle may provoke in an organization?</p> <p>If action not used, mark "No" and go to next reflection question</p> | <p>yesno, Required</p> <table border="1"> <tr><td>1</td><td>Yes</td></tr> <tr><td>0</td><td>No</td></tr> </table> <p>Custom alignment: RH</p>                                                                                                                                                                           | 1 | Yes                       | 0 | No                      |   |                           |   |                     |   |                          |
| 1   | Yes                                                                                                   |                                                                                                                                                                                                                                                                                                                                                                                    |                                                                                                                                                                                                                                                                                                                         |   |                           |   |                         |   |                           |   |                     |   |                          |
| 0   | No                                                                                                    |                                                                                                                                                                                                                                                                                                                                                                                    |                                                                                                                                                                                                                                                                                                                         |   |                           |   |                         |   |                           |   |                     |   |                          |
| 147 | <p>section_2_action_13_text</p> <p>Show the field ONLY if:<br/>[section_2_action_13_yes_no] = '1'</p> | <p>When reflecting on your ICU's ABCDEF bundle implementation efforts:</p>                                                                                                                                                                                                                                                                                                         | <p>descriptive</p>                                                                                                                                                                                                                                                                                                      |   |                           |   |                         |   |                           |   |                     |   |                          |

|     |                                                                                                       |                                                                                                                                                                                                                                                                                                                     |                                                                                                                                                                                                                                                                                                                         |   |                           |   |                         |   |                           |   |                     |   |                          |
|-----|-------------------------------------------------------------------------------------------------------|---------------------------------------------------------------------------------------------------------------------------------------------------------------------------------------------------------------------------------------------------------------------------------------------------------------------|-------------------------------------------------------------------------------------------------------------------------------------------------------------------------------------------------------------------------------------------------------------------------------------------------------------------------|---|---------------------------|---|-------------------------|---|---------------------------|---|---------------------|---|--------------------------|
| 148 | <p>section_2_action_13_a</p> <p>Show the field ONLY if:<br/>[section_2_action_13_yes_no] = '1'</p>    | A. How helpful was identifying and preparing champions for increasing bundle adoption?                                                                                                                                                                                                                              | <p>radio, Required</p> <table border="1"> <tr><td>1</td><td>1 = Not at all helpful</td></tr> <tr><td>2</td><td>2 = Somewhat helpful</td></tr> <tr><td>3</td><td>3 = Moderately helpful</td></tr> <tr><td>4</td><td>4 = Very helpful</td></tr> <tr><td>5</td><td>5 = Extremely helpful</td></tr> </table>                | 1 | 1 = Not at all helpful    | 2 | 2 = Somewhat helpful    | 3 | 3 = Moderately helpful    | 4 | 4 = Very helpful    | 5 | 5 = Extremely helpful    |
| 1   | 1 = Not at all helpful                                                                                |                                                                                                                                                                                                                                                                                                                     |                                                                                                                                                                                                                                                                                                                         |   |                           |   |                         |   |                           |   |                     |   |                          |
| 2   | 2 = Somewhat helpful                                                                                  |                                                                                                                                                                                                                                                                                                                     |                                                                                                                                                                                                                                                                                                                         |   |                           |   |                         |   |                           |   |                     |   |                          |
| 3   | 3 = Moderately helpful                                                                                |                                                                                                                                                                                                                                                                                                                     |                                                                                                                                                                                                                                                                                                                         |   |                           |   |                         |   |                           |   |                     |   |                          |
| 4   | 4 = Very helpful                                                                                      |                                                                                                                                                                                                                                                                                                                     |                                                                                                                                                                                                                                                                                                                         |   |                           |   |                         |   |                           |   |                     |   |                          |
| 5   | 5 = Extremely helpful                                                                                 |                                                                                                                                                                                                                                                                                                                     |                                                                                                                                                                                                                                                                                                                         |   |                           |   |                         |   |                           |   |                     |   |                          |
| 149 | <p>section_2_action_13_b</p> <p>Show the field ONLY if:<br/>[section_2_action_13_yes_no] = '1'</p>    | B. How acceptable was identifying and preparing bundle champions among ICU team members?                                                                                                                                                                                                                            | <p>radio, Required</p> <table border="1"> <tr><td>1</td><td>1 = Not at all acceptable</td></tr> <tr><td>2</td><td>2 = Somewhat acceptable</td></tr> <tr><td>3</td><td>3 = Moderately acceptable</td></tr> <tr><td>4</td><td>4 = Very acceptable</td></tr> <tr><td>5</td><td>5 = Extremely acceptable</td></tr> </table> | 1 | 1 = Not at all acceptable | 2 | 2 = Somewhat acceptable | 3 | 3 = Moderately acceptable | 4 | 4 = Very acceptable | 5 | 5 = Extremely acceptable |
| 1   | 1 = Not at all acceptable                                                                             |                                                                                                                                                                                                                                                                                                                     |                                                                                                                                                                                                                                                                                                                         |   |                           |   |                         |   |                           |   |                     |   |                          |
| 2   | 2 = Somewhat acceptable                                                                               |                                                                                                                                                                                                                                                                                                                     |                                                                                                                                                                                                                                                                                                                         |   |                           |   |                         |   |                           |   |                     |   |                          |
| 3   | 3 = Moderately acceptable                                                                             |                                                                                                                                                                                                                                                                                                                     |                                                                                                                                                                                                                                                                                                                         |   |                           |   |                         |   |                           |   |                     |   |                          |
| 4   | 4 = Very acceptable                                                                                   |                                                                                                                                                                                                                                                                                                                     |                                                                                                                                                                                                                                                                                                                         |   |                           |   |                         |   |                           |   |                     |   |                          |
| 5   | 5 = Extremely acceptable                                                                              |                                                                                                                                                                                                                                                                                                                     |                                                                                                                                                                                                                                                                                                                         |   |                           |   |                         |   |                           |   |                     |   |                          |
| 150 | <p>section_2_action_13_c</p> <p>Show the field ONLY if:<br/>[section_2_action_13_yes_no] = '1'</p>    | C. How feasible was it to identify and prepare bundle champions?                                                                                                                                                                                                                                                    | <p>radio, Required</p> <table border="1"> <tr><td>1</td><td>1 = Not at all feasible</td></tr> <tr><td>2</td><td>2 = Somewhat feasible</td></tr> <tr><td>3</td><td>3 = Moderately feasible</td></tr> <tr><td>4</td><td>4 = Very feasible</td></tr> <tr><td>5</td><td>5 = Extremely feasible</td></tr> </table>           | 1 | 1 = Not at all feasible   | 2 | 2 = Somewhat feasible   | 3 | 3 = Moderately feasible   | 4 | 4 = Very feasible   | 5 | 5 = Extremely feasible   |
| 1   | 1 = Not at all feasible                                                                               |                                                                                                                                                                                                                                                                                                                     |                                                                                                                                                                                                                                                                                                                         |   |                           |   |                         |   |                           |   |                     |   |                          |
| 2   | 2 = Somewhat feasible                                                                                 |                                                                                                                                                                                                                                                                                                                     |                                                                                                                                                                                                                                                                                                                         |   |                           |   |                         |   |                           |   |                     |   |                          |
| 3   | 3 = Moderately feasible                                                                               |                                                                                                                                                                                                                                                                                                                     |                                                                                                                                                                                                                                                                                                                         |   |                           |   |                         |   |                           |   |                     |   |                          |
| 4   | 4 = Very feasible                                                                                     |                                                                                                                                                                                                                                                                                                                     |                                                                                                                                                                                                                                                                                                                         |   |                           |   |                         |   |                           |   |                     |   |                          |
| 5   | 5 = Extremely feasible                                                                                |                                                                                                                                                                                                                                                                                                                     |                                                                                                                                                                                                                                                                                                                         |   |                           |   |                         |   |                           |   |                     |   |                          |
| 151 | <p>section_2_action_13_d</p> <p>Show the field ONLY if:<br/>[section_2_action_13_yes_no] = '1'</p>    | D. How costly (in terms of staff time, equipment, and other) was identifying and preparing bundle champions?                                                                                                                                                                                                        | <p>radio, Required</p> <table border="1"> <tr><td>1</td><td>1 =Not at all costly</td></tr> <tr><td>2</td><td>2 = Somewhat costly</td></tr> <tr><td>3</td><td>3 = Moderately costly</td></tr> <tr><td>4</td><td>4 = Very costly</td></tr> <tr><td>5</td><td>5 = Extremely costly</td></tr> </table>                      | 1 | 1 =Not at all costly      | 2 | 2 = Somewhat costly     | 3 | 3 = Moderately costly     | 4 | 4 = Very costly     | 5 | 5 = Extremely costly     |
| 1   | 1 =Not at all costly                                                                                  |                                                                                                                                                                                                                                                                                                                     |                                                                                                                                                                                                                                                                                                                         |   |                           |   |                         |   |                           |   |                     |   |                          |
| 2   | 2 = Somewhat costly                                                                                   |                                                                                                                                                                                                                                                                                                                     |                                                                                                                                                                                                                                                                                                                         |   |                           |   |                         |   |                           |   |                     |   |                          |
| 3   | 3 = Moderately costly                                                                                 |                                                                                                                                                                                                                                                                                                                     |                                                                                                                                                                                                                                                                                                                         |   |                           |   |                         |   |                           |   |                     |   |                          |
| 4   | 4 = Very costly                                                                                       |                                                                                                                                                                                                                                                                                                                     |                                                                                                                                                                                                                                                                                                                         |   |                           |   |                         |   |                           |   |                     |   |                          |
| 5   | 5 = Extremely costly                                                                                  |                                                                                                                                                                                                                                                                                                                     |                                                                                                                                                                                                                                                                                                                         |   |                           |   |                         |   |                           |   |                     |   |                          |
| 152 | <p>section_2_action_14_yes_no</p>                                                                     | <p>Action 14: Develop an implementation glossary</p> <p>Q: Did your institution develop and distribute a list of terms describing the bundle, implementation, and stakeholders involved in ABCDEF bundle-related organizational change?</p> <p>If action not used, mark "No" and go to next reflection question</p> | <p>yesno, Required</p> <table border="1"> <tr><td>1</td><td>Yes</td></tr> <tr><td>0</td><td>No</td></tr> </table> <p>Custom alignment: RH</p>                                                                                                                                                                           | 1 | Yes                       | 0 | No                      |   |                           |   |                     |   |                          |
| 1   | Yes                                                                                                   |                                                                                                                                                                                                                                                                                                                     |                                                                                                                                                                                                                                                                                                                         |   |                           |   |                         |   |                           |   |                     |   |                          |
| 0   | No                                                                                                    |                                                                                                                                                                                                                                                                                                                     |                                                                                                                                                                                                                                                                                                                         |   |                           |   |                         |   |                           |   |                     |   |                          |
| 153 | <p>section_2_action_14_text</p> <p>Show the field ONLY if:<br/>[section_2_action_14_yes_no] = '1'</p> | When reflecting on your ICU's ABCDEF bundle implementation efforts:                                                                                                                                                                                                                                                 | descriptive                                                                                                                                                                                                                                                                                                             |   |                           |   |                         |   |                           |   |                     |   |                          |
| 154 | <p>section_2_action_14_a</p> <p>Show the field ONLY if:<br/>[section_2_action_14_yes_no] = '1'</p>    | A. How helpful was developing an implementation glossary for increasing bundle adoption?                                                                                                                                                                                                                            | <p>radio, Required</p> <table border="1"> <tr><td>1</td><td>1 = Not at all helpful</td></tr> <tr><td>2</td><td>2 = Somewhat helpful</td></tr> <tr><td>3</td><td>3 = Moderately helpful</td></tr> <tr><td>4</td><td>4 = Very helpful</td></tr> <tr><td>5</td><td>5 = Extremely helpful</td></tr> </table>                | 1 | 1 = Not at all helpful    | 2 | 2 = Somewhat helpful    | 3 | 3 = Moderately helpful    | 4 | 4 = Very helpful    | 5 | 5 = Extremely helpful    |
| 1   | 1 = Not at all helpful                                                                                |                                                                                                                                                                                                                                                                                                                     |                                                                                                                                                                                                                                                                                                                         |   |                           |   |                         |   |                           |   |                     |   |                          |
| 2   | 2 = Somewhat helpful                                                                                  |                                                                                                                                                                                                                                                                                                                     |                                                                                                                                                                                                                                                                                                                         |   |                           |   |                         |   |                           |   |                     |   |                          |
| 3   | 3 = Moderately helpful                                                                                |                                                                                                                                                                                                                                                                                                                     |                                                                                                                                                                                                                                                                                                                         |   |                           |   |                         |   |                           |   |                     |   |                          |
| 4   | 4 = Very helpful                                                                                      |                                                                                                                                                                                                                                                                                                                     |                                                                                                                                                                                                                                                                                                                         |   |                           |   |                         |   |                           |   |                     |   |                          |
| 5   | 5 = Extremely helpful                                                                                 |                                                                                                                                                                                                                                                                                                                     |                                                                                                                                                                                                                                                                                                                         |   |                           |   |                         |   |                           |   |                     |   |                          |
| 155 | <p>section_2_action_14_b</p> <p>Show the field ONLY if:<br/>[section_2_action_14_yes_no] = '1'</p>    | B. How acceptable was developing a bundle-related implementation glossary among ICU team members?                                                                                                                                                                                                                   | <p>radio, Required</p> <table border="1"> <tr><td>1</td><td>1 = Not at all acceptable</td></tr> <tr><td>2</td><td>2 = Somewhat acceptable</td></tr> <tr><td>3</td><td>3 = Moderately acceptable</td></tr> <tr><td>4</td><td>4 = Very acceptable</td></tr> <tr><td>5</td><td>5 = Extremely acceptable</td></tr> </table> | 1 | 1 = Not at all acceptable | 2 | 2 = Somewhat acceptable | 3 | 3 = Moderately acceptable | 4 | 4 = Very acceptable | 5 | 5 = Extremely acceptable |
| 1   | 1 = Not at all acceptable                                                                             |                                                                                                                                                                                                                                                                                                                     |                                                                                                                                                                                                                                                                                                                         |   |                           |   |                         |   |                           |   |                     |   |                          |
| 2   | 2 = Somewhat acceptable                                                                               |                                                                                                                                                                                                                                                                                                                     |                                                                                                                                                                                                                                                                                                                         |   |                           |   |                         |   |                           |   |                     |   |                          |
| 3   | 3 = Moderately acceptable                                                                             |                                                                                                                                                                                                                                                                                                                     |                                                                                                                                                                                                                                                                                                                         |   |                           |   |                         |   |                           |   |                     |   |                          |
| 4   | 4 = Very acceptable                                                                                   |                                                                                                                                                                                                                                                                                                                     |                                                                                                                                                                                                                                                                                                                         |   |                           |   |                         |   |                           |   |                     |   |                          |
| 5   | 5 = Extremely acceptable                                                                              |                                                                                                                                                                                                                                                                                                                     |                                                                                                                                                                                                                                                                                                                         |   |                           |   |                         |   |                           |   |                     |   |                          |
| 156 | <p>section_2_action_14_c</p> <p>Show the field ONLY if:<br/>[section_2_action_14_yes_no] = '1'</p>    | C. How feasible was it to develop a bundle-related implementation glossary?                                                                                                                                                                                                                                         | <p>radio, Required</p> <table border="1"> <tr><td>1</td><td>1 = Not at all feasible</td></tr> <tr><td>2</td><td>2 = Somewhat feasible</td></tr> <tr><td>3</td><td>3 = Moderately feasible</td></tr> <tr><td>4</td><td>4 = Very feasible</td></tr> <tr><td>5</td><td>5 = Extremely feasible</td></tr> </table>           | 1 | 1 = Not at all feasible   | 2 | 2 = Somewhat feasible   | 3 | 3 = Moderately feasible   | 4 | 4 = Very feasible   | 5 | 5 = Extremely feasible   |
| 1   | 1 = Not at all feasible                                                                               |                                                                                                                                                                                                                                                                                                                     |                                                                                                                                                                                                                                                                                                                         |   |                           |   |                         |   |                           |   |                     |   |                          |
| 2   | 2 = Somewhat feasible                                                                                 |                                                                                                                                                                                                                                                                                                                     |                                                                                                                                                                                                                                                                                                                         |   |                           |   |                         |   |                           |   |                     |   |                          |
| 3   | 3 = Moderately feasible                                                                               |                                                                                                                                                                                                                                                                                                                     |                                                                                                                                                                                                                                                                                                                         |   |                           |   |                         |   |                           |   |                     |   |                          |
| 4   | 4 = Very feasible                                                                                     |                                                                                                                                                                                                                                                                                                                     |                                                                                                                                                                                                                                                                                                                         |   |                           |   |                         |   |                           |   |                     |   |                          |
| 5   | 5 = Extremely feasible                                                                                |                                                                                                                                                                                                                                                                                                                     |                                                                                                                                                                                                                                                                                                                         |   |                           |   |                         |   |                           |   |                     |   |                          |

|     |                                                                                                       |                                                                                                                                                                                                                                                                                                                                                                                                                                        |                                                                                                                                                                                                                                                                                                                         |   |                           |   |                         |   |                           |   |                     |   |                          |
|-----|-------------------------------------------------------------------------------------------------------|----------------------------------------------------------------------------------------------------------------------------------------------------------------------------------------------------------------------------------------------------------------------------------------------------------------------------------------------------------------------------------------------------------------------------------------|-------------------------------------------------------------------------------------------------------------------------------------------------------------------------------------------------------------------------------------------------------------------------------------------------------------------------|---|---------------------------|---|-------------------------|---|---------------------------|---|---------------------|---|--------------------------|
| 157 | <p>section_2_action_14_d</p> <p>Show the field ONLY if:<br/>[section_2_action_14_yes_no] = '1'</p>    | <p>D. How costly (in terms of staff time, equipment, and other) was developing a bundle-related implementation glossary?</p>                                                                                                                                                                                                                                                                                                           | <p>radio, Required</p> <table border="1"> <tr><td>1</td><td>1 = Not at all costly</td></tr> <tr><td>2</td><td>2 = Somewhat costly</td></tr> <tr><td>3</td><td>3 = Moderately costly</td></tr> <tr><td>4</td><td>4 = Very costly</td></tr> <tr><td>5</td><td>5 = Extremely costly</td></tr> </table>                     | 1 | 1 = Not at all costly     | 2 | 2 = Somewhat costly     | 3 | 3 = Moderately costly     | 4 | 4 = Very costly     | 5 | 5 = Extremely costly     |
| 1   | 1 = Not at all costly                                                                                 |                                                                                                                                                                                                                                                                                                                                                                                                                                        |                                                                                                                                                                                                                                                                                                                         |   |                           |   |                         |   |                           |   |                     |   |                          |
| 2   | 2 = Somewhat costly                                                                                   |                                                                                                                                                                                                                                                                                                                                                                                                                                        |                                                                                                                                                                                                                                                                                                                         |   |                           |   |                         |   |                           |   |                     |   |                          |
| 3   | 3 = Moderately costly                                                                                 |                                                                                                                                                                                                                                                                                                                                                                                                                                        |                                                                                                                                                                                                                                                                                                                         |   |                           |   |                         |   |                           |   |                     |   |                          |
| 4   | 4 = Very costly                                                                                       |                                                                                                                                                                                                                                                                                                                                                                                                                                        |                                                                                                                                                                                                                                                                                                                         |   |                           |   |                         |   |                           |   |                     |   |                          |
| 5   | 5 = Extremely costly                                                                                  |                                                                                                                                                                                                                                                                                                                                                                                                                                        |                                                                                                                                                                                                                                                                                                                         |   |                           |   |                         |   |                           |   |                     |   |                          |
| 158 | <p>section_2_action_15_yes_no</p>                                                                     | <p>Action 15: Conduct local consensus discussions</p> <p>Q: Did your institution include local providers and other stakeholders in discussions that address whether ICU-acquired pain, agitation, deep-sedation, delirium, immobility, and family engagement are important and whether using the ABCDEF bundle to address these conditions is appropriate?</p> <p>If action not used, mark "No" and go to next reflection question</p> | <p>yesno, Required</p> <table border="1"> <tr><td>1</td><td>Yes</td></tr> <tr><td>0</td><td>No</td></tr> </table> <p>Custom alignment: RH</p>                                                                                                                                                                           | 1 | Yes                       | 0 | No                      |   |                           |   |                     |   |                          |
| 1   | Yes                                                                                                   |                                                                                                                                                                                                                                                                                                                                                                                                                                        |                                                                                                                                                                                                                                                                                                                         |   |                           |   |                         |   |                           |   |                     |   |                          |
| 0   | No                                                                                                    |                                                                                                                                                                                                                                                                                                                                                                                                                                        |                                                                                                                                                                                                                                                                                                                         |   |                           |   |                         |   |                           |   |                     |   |                          |
| 159 | <p>section_2_action_15_text</p> <p>Show the field ONLY if:<br/>[section_2_action_15_yes_no] = '1'</p> | <p>When reflecting on your ICU's ABCDEF bundle implementation efforts:</p>                                                                                                                                                                                                                                                                                                                                                             | <p>descriptive</p>                                                                                                                                                                                                                                                                                                      |   |                           |   |                         |   |                           |   |                     |   |                          |
| 160 | <p>section_2_action_15_a</p> <p>Show the field ONLY if:<br/>[section_2_action_15_yes_no] = '1'</p>    | <p>A. How helpful was conducting local consensus discussions for increasing bundle adoption?</p>                                                                                                                                                                                                                                                                                                                                       | <p>radio, Required</p> <table border="1"> <tr><td>1</td><td>1 = Not at all helpful</td></tr> <tr><td>2</td><td>2 = Somewhat helpful</td></tr> <tr><td>3</td><td>3 = Moderately helpful</td></tr> <tr><td>4</td><td>4 = Very helpful</td></tr> <tr><td>5</td><td>5 = Extremely helpful</td></tr> </table>                | 1 | 1 = Not at all helpful    | 2 | 2 = Somewhat helpful    | 3 | 3 = Moderately helpful    | 4 | 4 = Very helpful    | 5 | 5 = Extremely helpful    |
| 1   | 1 = Not at all helpful                                                                                |                                                                                                                                                                                                                                                                                                                                                                                                                                        |                                                                                                                                                                                                                                                                                                                         |   |                           |   |                         |   |                           |   |                     |   |                          |
| 2   | 2 = Somewhat helpful                                                                                  |                                                                                                                                                                                                                                                                                                                                                                                                                                        |                                                                                                                                                                                                                                                                                                                         |   |                           |   |                         |   |                           |   |                     |   |                          |
| 3   | 3 = Moderately helpful                                                                                |                                                                                                                                                                                                                                                                                                                                                                                                                                        |                                                                                                                                                                                                                                                                                                                         |   |                           |   |                         |   |                           |   |                     |   |                          |
| 4   | 4 = Very helpful                                                                                      |                                                                                                                                                                                                                                                                                                                                                                                                                                        |                                                                                                                                                                                                                                                                                                                         |   |                           |   |                         |   |                           |   |                     |   |                          |
| 5   | 5 = Extremely helpful                                                                                 |                                                                                                                                                                                                                                                                                                                                                                                                                                        |                                                                                                                                                                                                                                                                                                                         |   |                           |   |                         |   |                           |   |                     |   |                          |
| 161 | <p>section_2_action_15_b</p> <p>Show the field ONLY if:<br/>[section_2_action_15_yes_no] = '1'</p>    | <p>B. How acceptable was conducting local bundle-related consensus discussions among ICU team members?</p>                                                                                                                                                                                                                                                                                                                             | <p>radio, Required</p> <table border="1"> <tr><td>1</td><td>1 = Not at all acceptable</td></tr> <tr><td>2</td><td>2 = Somewhat acceptable</td></tr> <tr><td>3</td><td>3 = Moderately acceptable</td></tr> <tr><td>4</td><td>4 = Very acceptable</td></tr> <tr><td>5</td><td>5 = Extremely acceptable</td></tr> </table> | 1 | 1 = Not at all acceptable | 2 | 2 = Somewhat acceptable | 3 | 3 = Moderately acceptable | 4 | 4 = Very acceptable | 5 | 5 = Extremely acceptable |
| 1   | 1 = Not at all acceptable                                                                             |                                                                                                                                                                                                                                                                                                                                                                                                                                        |                                                                                                                                                                                                                                                                                                                         |   |                           |   |                         |   |                           |   |                     |   |                          |
| 2   | 2 = Somewhat acceptable                                                                               |                                                                                                                                                                                                                                                                                                                                                                                                                                        |                                                                                                                                                                                                                                                                                                                         |   |                           |   |                         |   |                           |   |                     |   |                          |
| 3   | 3 = Moderately acceptable                                                                             |                                                                                                                                                                                                                                                                                                                                                                                                                                        |                                                                                                                                                                                                                                                                                                                         |   |                           |   |                         |   |                           |   |                     |   |                          |
| 4   | 4 = Very acceptable                                                                                   |                                                                                                                                                                                                                                                                                                                                                                                                                                        |                                                                                                                                                                                                                                                                                                                         |   |                           |   |                         |   |                           |   |                     |   |                          |
| 5   | 5 = Extremely acceptable                                                                              |                                                                                                                                                                                                                                                                                                                                                                                                                                        |                                                                                                                                                                                                                                                                                                                         |   |                           |   |                         |   |                           |   |                     |   |                          |
| 162 | <p>section_2_action_15_c</p> <p>Show the field ONLY if:<br/>[section_2_action_15_yes_no] = '1'</p>    | <p>C. How feasible was it to conduct local bundle-related consensus discussions?</p>                                                                                                                                                                                                                                                                                                                                                   | <p>radio, Required</p> <table border="1"> <tr><td>1</td><td>1 = Not at all feasible</td></tr> <tr><td>2</td><td>2 = Somewhat feasible</td></tr> <tr><td>3</td><td>3 = Moderately feasible</td></tr> <tr><td>4</td><td>4 = Very feasible</td></tr> <tr><td>5</td><td>5 = Extremely feasible</td></tr> </table>           | 1 | 1 = Not at all feasible   | 2 | 2 = Somewhat feasible   | 3 | 3 = Moderately feasible   | 4 | 4 = Very feasible   | 5 | 5 = Extremely feasible   |
| 1   | 1 = Not at all feasible                                                                               |                                                                                                                                                                                                                                                                                                                                                                                                                                        |                                                                                                                                                                                                                                                                                                                         |   |                           |   |                         |   |                           |   |                     |   |                          |
| 2   | 2 = Somewhat feasible                                                                                 |                                                                                                                                                                                                                                                                                                                                                                                                                                        |                                                                                                                                                                                                                                                                                                                         |   |                           |   |                         |   |                           |   |                     |   |                          |
| 3   | 3 = Moderately feasible                                                                               |                                                                                                                                                                                                                                                                                                                                                                                                                                        |                                                                                                                                                                                                                                                                                                                         |   |                           |   |                         |   |                           |   |                     |   |                          |
| 4   | 4 = Very feasible                                                                                     |                                                                                                                                                                                                                                                                                                                                                                                                                                        |                                                                                                                                                                                                                                                                                                                         |   |                           |   |                         |   |                           |   |                     |   |                          |
| 5   | 5 = Extremely feasible                                                                                |                                                                                                                                                                                                                                                                                                                                                                                                                                        |                                                                                                                                                                                                                                                                                                                         |   |                           |   |                         |   |                           |   |                     |   |                          |
| 163 | <p>section_2_action_15_d</p> <p>Show the field ONLY if:<br/>[section_2_action_15_yes_no] = '1'</p>    | <p>D. How costly (in terms of staff time, equipment, and other) was conducting local bundle-related consensus discussions?</p>                                                                                                                                                                                                                                                                                                         | <p>radio, Required</p> <table border="1"> <tr><td>1</td><td>1 = Not at all costly</td></tr> <tr><td>2</td><td>2 = Somewhat costly</td></tr> <tr><td>3</td><td>3 = Moderately costly</td></tr> <tr><td>4</td><td>4 = Very costly</td></tr> <tr><td>5</td><td>5 = Extremely costly</td></tr> </table>                     | 1 | 1 = Not at all costly     | 2 | 2 = Somewhat costly     | 3 | 3 = Moderately costly     | 4 | 4 = Very costly     | 5 | 5 = Extremely costly     |
| 1   | 1 = Not at all costly                                                                                 |                                                                                                                                                                                                                                                                                                                                                                                                                                        |                                                                                                                                                                                                                                                                                                                         |   |                           |   |                         |   |                           |   |                     |   |                          |
| 2   | 2 = Somewhat costly                                                                                   |                                                                                                                                                                                                                                                                                                                                                                                                                                        |                                                                                                                                                                                                                                                                                                                         |   |                           |   |                         |   |                           |   |                     |   |                          |
| 3   | 3 = Moderately costly                                                                                 |                                                                                                                                                                                                                                                                                                                                                                                                                                        |                                                                                                                                                                                                                                                                                                                         |   |                           |   |                         |   |                           |   |                     |   |                          |
| 4   | 4 = Very costly                                                                                       |                                                                                                                                                                                                                                                                                                                                                                                                                                        |                                                                                                                                                                                                                                                                                                                         |   |                           |   |                         |   |                           |   |                     |   |                          |
| 5   | 5 = Extremely costly                                                                                  |                                                                                                                                                                                                                                                                                                                                                                                                                                        |                                                                                                                                                                                                                                                                                                                         |   |                           |   |                         |   |                           |   |                     |   |                          |
| 164 | <p>section_2_action_16_yes_no</p>                                                                     | <p>Action 16: Build a coalition</p> <p>Q: Did your institution recruit and cultivate relationships with partners in the ABCDEF bundle implementation effort?</p> <p>If action not used, mark "No" and go to next reflection question</p>                                                                                                                                                                                               | <p>yesno, Required</p> <table border="1"> <tr><td>1</td><td>Yes</td></tr> <tr><td>0</td><td>No</td></tr> </table> <p>Custom alignment: RH</p>                                                                                                                                                                           | 1 | Yes                       | 0 | No                      |   |                           |   |                     |   |                          |
| 1   | Yes                                                                                                   |                                                                                                                                                                                                                                                                                                                                                                                                                                        |                                                                                                                                                                                                                                                                                                                         |   |                           |   |                         |   |                           |   |                     |   |                          |
| 0   | No                                                                                                    |                                                                                                                                                                                                                                                                                                                                                                                                                                        |                                                                                                                                                                                                                                                                                                                         |   |                           |   |                         |   |                           |   |                     |   |                          |
| 165 | <p>section_2_action_16_text</p> <p>Show the field ONLY if:<br/>[section_2_action_16_yes_no] = '1'</p> | <p>When reflecting on your ICU's ABCDEF bundle implementation efforts:</p>                                                                                                                                                                                                                                                                                                                                                             | <p>descriptive</p>                                                                                                                                                                                                                                                                                                      |   |                           |   |                         |   |                           |   |                     |   |                          |

|     |                                                                                                       |                                                                                                                                                                                                                                                                                                                                                                         |                                                                                                                                                                                                                                                                                                                         |   |                           |   |                         |   |                           |   |                     |   |                          |
|-----|-------------------------------------------------------------------------------------------------------|-------------------------------------------------------------------------------------------------------------------------------------------------------------------------------------------------------------------------------------------------------------------------------------------------------------------------------------------------------------------------|-------------------------------------------------------------------------------------------------------------------------------------------------------------------------------------------------------------------------------------------------------------------------------------------------------------------------|---|---------------------------|---|-------------------------|---|---------------------------|---|---------------------|---|--------------------------|
| 166 | <p>section_2_action_16_a</p> <p>Show the field ONLY if:<br/>[section_2_action_16_yes_no] = '1'</p>    | <p>A. How helpful was building a coalition for increasing bundle adoption?</p>                                                                                                                                                                                                                                                                                          | <p>radio, Required</p> <table border="1"> <tr><td>1</td><td>1 = Not at all helpful</td></tr> <tr><td>2</td><td>2 = Somewhat helpful</td></tr> <tr><td>3</td><td>3 = Moderately helpful</td></tr> <tr><td>4</td><td>4 = Very helpful</td></tr> <tr><td>5</td><td>5 = Extremely helpful</td></tr> </table>                | 1 | 1 = Not at all helpful    | 2 | 2 = Somewhat helpful    | 3 | 3 = Moderately helpful    | 4 | 4 = Very helpful    | 5 | 5 = Extremely helpful    |
| 1   | 1 = Not at all helpful                                                                                |                                                                                                                                                                                                                                                                                                                                                                         |                                                                                                                                                                                                                                                                                                                         |   |                           |   |                         |   |                           |   |                     |   |                          |
| 2   | 2 = Somewhat helpful                                                                                  |                                                                                                                                                                                                                                                                                                                                                                         |                                                                                                                                                                                                                                                                                                                         |   |                           |   |                         |   |                           |   |                     |   |                          |
| 3   | 3 = Moderately helpful                                                                                |                                                                                                                                                                                                                                                                                                                                                                         |                                                                                                                                                                                                                                                                                                                         |   |                           |   |                         |   |                           |   |                     |   |                          |
| 4   | 4 = Very helpful                                                                                      |                                                                                                                                                                                                                                                                                                                                                                         |                                                                                                                                                                                                                                                                                                                         |   |                           |   |                         |   |                           |   |                     |   |                          |
| 5   | 5 = Extremely helpful                                                                                 |                                                                                                                                                                                                                                                                                                                                                                         |                                                                                                                                                                                                                                                                                                                         |   |                           |   |                         |   |                           |   |                     |   |                          |
| 167 | <p>section_2_action_16_b</p> <p>Show the field ONLY if:<br/>[section_2_action_16_yes_no] = '1'</p>    | <p>B. How acceptable was building a bundle-related coalition among ICU team members?</p>                                                                                                                                                                                                                                                                                | <p>radio, Required</p> <table border="1"> <tr><td>1</td><td>1 = Not at all acceptable</td></tr> <tr><td>2</td><td>2 = Somewhat acceptable</td></tr> <tr><td>3</td><td>3 = Moderately acceptable</td></tr> <tr><td>4</td><td>4 = Very acceptable</td></tr> <tr><td>5</td><td>5 = Extremely acceptable</td></tr> </table> | 1 | 1 = Not at all acceptable | 2 | 2 = Somewhat acceptable | 3 | 3 = Moderately acceptable | 4 | 4 = Very acceptable | 5 | 5 = Extremely acceptable |
| 1   | 1 = Not at all acceptable                                                                             |                                                                                                                                                                                                                                                                                                                                                                         |                                                                                                                                                                                                                                                                                                                         |   |                           |   |                         |   |                           |   |                     |   |                          |
| 2   | 2 = Somewhat acceptable                                                                               |                                                                                                                                                                                                                                                                                                                                                                         |                                                                                                                                                                                                                                                                                                                         |   |                           |   |                         |   |                           |   |                     |   |                          |
| 3   | 3 = Moderately acceptable                                                                             |                                                                                                                                                                                                                                                                                                                                                                         |                                                                                                                                                                                                                                                                                                                         |   |                           |   |                         |   |                           |   |                     |   |                          |
| 4   | 4 = Very acceptable                                                                                   |                                                                                                                                                                                                                                                                                                                                                                         |                                                                                                                                                                                                                                                                                                                         |   |                           |   |                         |   |                           |   |                     |   |                          |
| 5   | 5 = Extremely acceptable                                                                              |                                                                                                                                                                                                                                                                                                                                                                         |                                                                                                                                                                                                                                                                                                                         |   |                           |   |                         |   |                           |   |                     |   |                          |
| 168 | <p>section_2_action_16_c</p> <p>Show the field ONLY if:<br/>[section_2_action_16_yes_no] = '1'</p>    | <p>C. How feasible was it build a bundle-related coalition?</p>                                                                                                                                                                                                                                                                                                         | <p>radio, Required</p> <table border="1"> <tr><td>1</td><td>1 = Not at all feasible</td></tr> <tr><td>2</td><td>2 = Somewhat feasible</td></tr> <tr><td>3</td><td>3 = Moderately feasible</td></tr> <tr><td>4</td><td>4 = Very feasible</td></tr> <tr><td>5</td><td>5 = Extremely feasible</td></tr> </table>           | 1 | 1 = Not at all feasible   | 2 | 2 = Somewhat feasible   | 3 | 3 = Moderately feasible   | 4 | 4 = Very feasible   | 5 | 5 = Extremely feasible   |
| 1   | 1 = Not at all feasible                                                                               |                                                                                                                                                                                                                                                                                                                                                                         |                                                                                                                                                                                                                                                                                                                         |   |                           |   |                         |   |                           |   |                     |   |                          |
| 2   | 2 = Somewhat feasible                                                                                 |                                                                                                                                                                                                                                                                                                                                                                         |                                                                                                                                                                                                                                                                                                                         |   |                           |   |                         |   |                           |   |                     |   |                          |
| 3   | 3 = Moderately feasible                                                                               |                                                                                                                                                                                                                                                                                                                                                                         |                                                                                                                                                                                                                                                                                                                         |   |                           |   |                         |   |                           |   |                     |   |                          |
| 4   | 4 = Very feasible                                                                                     |                                                                                                                                                                                                                                                                                                                                                                         |                                                                                                                                                                                                                                                                                                                         |   |                           |   |                         |   |                           |   |                     |   |                          |
| 5   | 5 = Extremely feasible                                                                                |                                                                                                                                                                                                                                                                                                                                                                         |                                                                                                                                                                                                                                                                                                                         |   |                           |   |                         |   |                           |   |                     |   |                          |
| 169 | <p>section_2_action_16_d</p> <p>Show the field ONLY if:<br/>[section_2_action_16_yes_no] = '1'</p>    | <p>D. How costly (in terms of staff time, equipment, and other) was building a bundle-related coalition?</p>                                                                                                                                                                                                                                                            | <p>radio, Required</p> <table border="1"> <tr><td>1</td><td>1 =Not at all costly</td></tr> <tr><td>2</td><td>2 = Somewhat costly</td></tr> <tr><td>3</td><td>3 = Moderately costly</td></tr> <tr><td>4</td><td>4 = Very costly</td></tr> <tr><td>5</td><td>5 = Extremely costly</td></tr> </table>                      | 1 | 1 =Not at all costly      | 2 | 2 = Somewhat costly     | 3 | 3 = Moderately costly     | 4 | 4 = Very costly     | 5 | 5 = Extremely costly     |
| 1   | 1 =Not at all costly                                                                                  |                                                                                                                                                                                                                                                                                                                                                                         |                                                                                                                                                                                                                                                                                                                         |   |                           |   |                         |   |                           |   |                     |   |                          |
| 2   | 2 = Somewhat costly                                                                                   |                                                                                                                                                                                                                                                                                                                                                                         |                                                                                                                                                                                                                                                                                                                         |   |                           |   |                         |   |                           |   |                     |   |                          |
| 3   | 3 = Moderately costly                                                                                 |                                                                                                                                                                                                                                                                                                                                                                         |                                                                                                                                                                                                                                                                                                                         |   |                           |   |                         |   |                           |   |                     |   |                          |
| 4   | 4 = Very costly                                                                                       |                                                                                                                                                                                                                                                                                                                                                                         |                                                                                                                                                                                                                                                                                                                         |   |                           |   |                         |   |                           |   |                     |   |                          |
| 5   | 5 = Extremely costly                                                                                  |                                                                                                                                                                                                                                                                                                                                                                         |                                                                                                                                                                                                                                                                                                                         |   |                           |   |                         |   |                           |   |                     |   |                          |
| 170 | <p>section_2_action_17_yes_no</p>                                                                     | <p>Action 17: Involve executive boards</p> <p>Q: Did your institution involve existing governing structures (e.g., boards of directors, medical/nursing staff boards of governance) in the ABCDEF bundle implementation effort, including the review of data on the implementation process?</p> <p>If action not used, mark "No" and go to next reflection question</p> | <p>yesno, Required</p> <table border="1"> <tr><td>1</td><td>Yes</td></tr> <tr><td>0</td><td>No</td></tr> </table> <p>Custom alignment: RH</p>                                                                                                                                                                           | 1 | Yes                       | 0 | No                      |   |                           |   |                     |   |                          |
| 1   | Yes                                                                                                   |                                                                                                                                                                                                                                                                                                                                                                         |                                                                                                                                                                                                                                                                                                                         |   |                           |   |                         |   |                           |   |                     |   |                          |
| 0   | No                                                                                                    |                                                                                                                                                                                                                                                                                                                                                                         |                                                                                                                                                                                                                                                                                                                         |   |                           |   |                         |   |                           |   |                     |   |                          |
| 171 | <p>section_2_action_17_text</p> <p>Show the field ONLY if:<br/>[section_2_action_17_yes_no] = '1'</p> | <p>When reflecting on your ICU's ABCDEF bundle implementation efforts:</p>                                                                                                                                                                                                                                                                                              | <p>descriptive</p>                                                                                                                                                                                                                                                                                                      |   |                           |   |                         |   |                           |   |                     |   |                          |
| 172 | <p>section_2_action_17_a</p> <p>Show the field ONLY if:<br/>[section_2_action_17_yes_no] = '1'</p>    | <p>A. How helpful was involving executive boards for increasing bundle adoption?</p>                                                                                                                                                                                                                                                                                    | <p>radio, Required</p> <table border="1"> <tr><td>1</td><td>1 = Not at all helpful</td></tr> <tr><td>2</td><td>2 = Somewhat helpful</td></tr> <tr><td>3</td><td>3 = Moderately helpful</td></tr> <tr><td>4</td><td>4 = Very helpful</td></tr> <tr><td>5</td><td>5 = Extremely helpful</td></tr> </table>                | 1 | 1 = Not at all helpful    | 2 | 2 = Somewhat helpful    | 3 | 3 = Moderately helpful    | 4 | 4 = Very helpful    | 5 | 5 = Extremely helpful    |
| 1   | 1 = Not at all helpful                                                                                |                                                                                                                                                                                                                                                                                                                                                                         |                                                                                                                                                                                                                                                                                                                         |   |                           |   |                         |   |                           |   |                     |   |                          |
| 2   | 2 = Somewhat helpful                                                                                  |                                                                                                                                                                                                                                                                                                                                                                         |                                                                                                                                                                                                                                                                                                                         |   |                           |   |                         |   |                           |   |                     |   |                          |
| 3   | 3 = Moderately helpful                                                                                |                                                                                                                                                                                                                                                                                                                                                                         |                                                                                                                                                                                                                                                                                                                         |   |                           |   |                         |   |                           |   |                     |   |                          |
| 4   | 4 = Very helpful                                                                                      |                                                                                                                                                                                                                                                                                                                                                                         |                                                                                                                                                                                                                                                                                                                         |   |                           |   |                         |   |                           |   |                     |   |                          |
| 5   | 5 = Extremely helpful                                                                                 |                                                                                                                                                                                                                                                                                                                                                                         |                                                                                                                                                                                                                                                                                                                         |   |                           |   |                         |   |                           |   |                     |   |                          |
| 173 | <p>section_2_action_17_b</p> <p>Show the field ONLY if:<br/>[section_2_action_17_yes_no] = '1'</p>    | <p>B. How acceptable was involving executive boards in bundle-related efforts among ICU team members?</p>                                                                                                                                                                                                                                                               | <p>radio, Required</p> <table border="1"> <tr><td>1</td><td>1 = Not at all acceptable</td></tr> <tr><td>2</td><td>2 = Somewhat acceptable</td></tr> <tr><td>3</td><td>3 = Moderately acceptable</td></tr> <tr><td>4</td><td>4 = Very acceptable</td></tr> <tr><td>5</td><td>5 = Extremely acceptable</td></tr> </table> | 1 | 1 = Not at all acceptable | 2 | 2 = Somewhat acceptable | 3 | 3 = Moderately acceptable | 4 | 4 = Very acceptable | 5 | 5 = Extremely acceptable |
| 1   | 1 = Not at all acceptable                                                                             |                                                                                                                                                                                                                                                                                                                                                                         |                                                                                                                                                                                                                                                                                                                         |   |                           |   |                         |   |                           |   |                     |   |                          |
| 2   | 2 = Somewhat acceptable                                                                               |                                                                                                                                                                                                                                                                                                                                                                         |                                                                                                                                                                                                                                                                                                                         |   |                           |   |                         |   |                           |   |                     |   |                          |
| 3   | 3 = Moderately acceptable                                                                             |                                                                                                                                                                                                                                                                                                                                                                         |                                                                                                                                                                                                                                                                                                                         |   |                           |   |                         |   |                           |   |                     |   |                          |
| 4   | 4 = Very acceptable                                                                                   |                                                                                                                                                                                                                                                                                                                                                                         |                                                                                                                                                                                                                                                                                                                         |   |                           |   |                         |   |                           |   |                     |   |                          |
| 5   | 5 = Extremely acceptable                                                                              |                                                                                                                                                                                                                                                                                                                                                                         |                                                                                                                                                                                                                                                                                                                         |   |                           |   |                         |   |                           |   |                     |   |                          |
| 174 | <p>section_2_action_17_c</p> <p>Show the field ONLY if:<br/>[section_2_action_17_yes_no] = '1'</p>    | <p>C. How feasible was it to involve executive boards in bundle-related efforts?</p>                                                                                                                                                                                                                                                                                    | <p>radio, Required</p> <table border="1"> <tr><td>1</td><td>1 = Not at all feasible</td></tr> <tr><td>2</td><td>2 = Somewhat feasible</td></tr> <tr><td>3</td><td>3 = Moderately feasible</td></tr> <tr><td>4</td><td>4 = Very feasible</td></tr> <tr><td>5</td><td>5 = Extremely feasible</td></tr> </table>           | 1 | 1 = Not at all feasible   | 2 | 2 = Somewhat feasible   | 3 | 3 = Moderately feasible   | 4 | 4 = Very feasible   | 5 | 5 = Extremely feasible   |
| 1   | 1 = Not at all feasible                                                                               |                                                                                                                                                                                                                                                                                                                                                                         |                                                                                                                                                                                                                                                                                                                         |   |                           |   |                         |   |                           |   |                     |   |                          |
| 2   | 2 = Somewhat feasible                                                                                 |                                                                                                                                                                                                                                                                                                                                                                         |                                                                                                                                                                                                                                                                                                                         |   |                           |   |                         |   |                           |   |                     |   |                          |
| 3   | 3 = Moderately feasible                                                                               |                                                                                                                                                                                                                                                                                                                                                                         |                                                                                                                                                                                                                                                                                                                         |   |                           |   |                         |   |                           |   |                     |   |                          |
| 4   | 4 = Very feasible                                                                                     |                                                                                                                                                                                                                                                                                                                                                                         |                                                                                                                                                                                                                                                                                                                         |   |                           |   |                         |   |                           |   |                     |   |                          |
| 5   | 5 = Extremely feasible                                                                                |                                                                                                                                                                                                                                                                                                                                                                         |                                                                                                                                                                                                                                                                                                                         |   |                           |   |                         |   |                           |   |                     |   |                          |

|     |                                                                                                     |                                                                                                                                                                                                                                                                                                                |                                                                                                                                                                                                                                                                                                                         |   |                           |   |                         |   |                           |   |                     |   |                          |
|-----|-----------------------------------------------------------------------------------------------------|----------------------------------------------------------------------------------------------------------------------------------------------------------------------------------------------------------------------------------------------------------------------------------------------------------------|-------------------------------------------------------------------------------------------------------------------------------------------------------------------------------------------------------------------------------------------------------------------------------------------------------------------------|---|---------------------------|---|-------------------------|---|---------------------------|---|---------------------|---|--------------------------|
| 175 | <p>section_2_action_17_d</p> <p>Show the field ONLY if:<br/>[section_2_action_17_yes_no] = '1'</p>  | <p>D. How costly (in terms of staff time, equipment, and other) was involving executive boards in bundle-related efforts?</p>                                                                                                                                                                                  | <p>radio, Required</p> <table border="1"> <tr><td>1</td><td>1 = Not at all costly</td></tr> <tr><td>2</td><td>2 = Somewhat costly</td></tr> <tr><td>3</td><td>3 = Moderately costly</td></tr> <tr><td>4</td><td>4 = Very costly</td></tr> <tr><td>5</td><td>5 = Extremely costly</td></tr> </table>                     | 1 | 1 = Not at all costly     | 2 | 2 = Somewhat costly     | 3 | 3 = Moderately costly     | 4 | 4 = Very costly     | 5 | 5 = Extremely costly     |
| 1   | 1 = Not at all costly                                                                               |                                                                                                                                                                                                                                                                                                                |                                                                                                                                                                                                                                                                                                                         |   |                           |   |                         |   |                           |   |                     |   |                          |
| 2   | 2 = Somewhat costly                                                                                 |                                                                                                                                                                                                                                                                                                                |                                                                                                                                                                                                                                                                                                                         |   |                           |   |                         |   |                           |   |                     |   |                          |
| 3   | 3 = Moderately costly                                                                               |                                                                                                                                                                                                                                                                                                                |                                                                                                                                                                                                                                                                                                                         |   |                           |   |                         |   |                           |   |                     |   |                          |
| 4   | 4 = Very costly                                                                                     |                                                                                                                                                                                                                                                                                                                |                                                                                                                                                                                                                                                                                                                         |   |                           |   |                         |   |                           |   |                     |   |                          |
| 5   | 5 = Extremely costly                                                                                |                                                                                                                                                                                                                                                                                                                |                                                                                                                                                                                                                                                                                                                         |   |                           |   |                         |   |                           |   |                     |   |                          |
| 176 | <p>section_3_text</p>                                                                               | <p>Section Header:<br/>SECTION 3: ENGAGE CONSUMERS (5 QUESTIONS)</p>                                                                                                                                                                                                                                           | <p>descriptive</p>                                                                                                                                                                                                                                                                                                      |   |                           |   |                         |   |                           |   |                     |   |                          |
| 177 | <p>section_3_action_1_yes_no</p>                                                                    | <p>Action 1: Involve patients/consumers and family members</p> <p>Q: Did your institution engage or include patients/consumers and families in ABCDEF bundle implementation efforts?</p> <p>If action not used, mark "No" and go to next reflection question</p>                                               | <p>yesno, Required</p> <table border="1"> <tr><td>1</td><td>Yes</td></tr> <tr><td>0</td><td>No</td></tr> </table> <p>Custom alignment: RH</p>                                                                                                                                                                           | 1 | Yes                       | 0 | No                      |   |                           |   |                     |   |                          |
| 1   | Yes                                                                                                 |                                                                                                                                                                                                                                                                                                                |                                                                                                                                                                                                                                                                                                                         |   |                           |   |                         |   |                           |   |                     |   |                          |
| 0   | No                                                                                                  |                                                                                                                                                                                                                                                                                                                |                                                                                                                                                                                                                                                                                                                         |   |                           |   |                         |   |                           |   |                     |   |                          |
| 178 | <p>section_3_action_1_text</p> <p>Show the field ONLY if:<br/>[section_3_action_1_yes_no] = '1'</p> | <p>When reflecting on your ICU's ABCDEF bundle implementation efforts:</p>                                                                                                                                                                                                                                     | <p>descriptive</p>                                                                                                                                                                                                                                                                                                      |   |                           |   |                         |   |                           |   |                     |   |                          |
| 179 | <p>section_3_action_1_a</p> <p>Show the field ONLY if:<br/>[section_3_action_1_yes_no] = '1'</p>    | <p>A. How helpful was involving patients/consumers or family members in increasing bundle adoption?</p>                                                                                                                                                                                                        | <p>radio, Required</p> <table border="1"> <tr><td>1</td><td>1 = Not at all helpful</td></tr> <tr><td>2</td><td>2 = Somewhat helpful</td></tr> <tr><td>3</td><td>3 = Moderately helpful</td></tr> <tr><td>4</td><td>4 = Very helpful</td></tr> <tr><td>5</td><td>5 = Extremely helpful</td></tr> </table>                | 1 | 1 = Not at all helpful    | 2 | 2 = Somewhat helpful    | 3 | 3 = Moderately helpful    | 4 | 4 = Very helpful    | 5 | 5 = Extremely helpful    |
| 1   | 1 = Not at all helpful                                                                              |                                                                                                                                                                                                                                                                                                                |                                                                                                                                                                                                                                                                                                                         |   |                           |   |                         |   |                           |   |                     |   |                          |
| 2   | 2 = Somewhat helpful                                                                                |                                                                                                                                                                                                                                                                                                                |                                                                                                                                                                                                                                                                                                                         |   |                           |   |                         |   |                           |   |                     |   |                          |
| 3   | 3 = Moderately helpful                                                                              |                                                                                                                                                                                                                                                                                                                |                                                                                                                                                                                                                                                                                                                         |   |                           |   |                         |   |                           |   |                     |   |                          |
| 4   | 4 = Very helpful                                                                                    |                                                                                                                                                                                                                                                                                                                |                                                                                                                                                                                                                                                                                                                         |   |                           |   |                         |   |                           |   |                     |   |                          |
| 5   | 5 = Extremely helpful                                                                               |                                                                                                                                                                                                                                                                                                                |                                                                                                                                                                                                                                                                                                                         |   |                           |   |                         |   |                           |   |                     |   |                          |
| 180 | <p>section_3_action_1_b</p> <p>Show the field ONLY if:<br/>[section_3_action_1_yes_no] = '1'</p>    | <p>B. How acceptable was involving patients/consumers or family members in bundle-related efforts among ICU team members?</p>                                                                                                                                                                                  | <p>radio, Required</p> <table border="1"> <tr><td>1</td><td>1 = Not at all acceptable</td></tr> <tr><td>2</td><td>2 = Somewhat acceptable</td></tr> <tr><td>3</td><td>3 = Moderately acceptable</td></tr> <tr><td>4</td><td>4 = Very acceptable</td></tr> <tr><td>5</td><td>5 = Extremely acceptable</td></tr> </table> | 1 | 1 = Not at all acceptable | 2 | 2 = Somewhat acceptable | 3 | 3 = Moderately acceptable | 4 | 4 = Very acceptable | 5 | 5 = Extremely acceptable |
| 1   | 1 = Not at all acceptable                                                                           |                                                                                                                                                                                                                                                                                                                |                                                                                                                                                                                                                                                                                                                         |   |                           |   |                         |   |                           |   |                     |   |                          |
| 2   | 2 = Somewhat acceptable                                                                             |                                                                                                                                                                                                                                                                                                                |                                                                                                                                                                                                                                                                                                                         |   |                           |   |                         |   |                           |   |                     |   |                          |
| 3   | 3 = Moderately acceptable                                                                           |                                                                                                                                                                                                                                                                                                                |                                                                                                                                                                                                                                                                                                                         |   |                           |   |                         |   |                           |   |                     |   |                          |
| 4   | 4 = Very acceptable                                                                                 |                                                                                                                                                                                                                                                                                                                |                                                                                                                                                                                                                                                                                                                         |   |                           |   |                         |   |                           |   |                     |   |                          |
| 5   | 5 = Extremely acceptable                                                                            |                                                                                                                                                                                                                                                                                                                |                                                                                                                                                                                                                                                                                                                         |   |                           |   |                         |   |                           |   |                     |   |                          |
| 181 | <p>section_3_action_1_c</p> <p>Show the field ONLY if:<br/>[section_3_action_1_yes_no] = '1'</p>    | <p>C. How feasible was it to involve patients/consumers or family members in bundle-related efforts?</p>                                                                                                                                                                                                       | <p>radio, Required</p> <table border="1"> <tr><td>1</td><td>1 = Not at all feasible</td></tr> <tr><td>2</td><td>2 = Somewhat feasible</td></tr> <tr><td>3</td><td>3 = Moderately feasible</td></tr> <tr><td>4</td><td>4 = Very feasible</td></tr> <tr><td>5</td><td>5 = Extremely feasible</td></tr> </table>           | 1 | 1 = Not at all feasible   | 2 | 2 = Somewhat feasible   | 3 | 3 = Moderately feasible   | 4 | 4 = Very feasible   | 5 | 5 = Extremely feasible   |
| 1   | 1 = Not at all feasible                                                                             |                                                                                                                                                                                                                                                                                                                |                                                                                                                                                                                                                                                                                                                         |   |                           |   |                         |   |                           |   |                     |   |                          |
| 2   | 2 = Somewhat feasible                                                                               |                                                                                                                                                                                                                                                                                                                |                                                                                                                                                                                                                                                                                                                         |   |                           |   |                         |   |                           |   |                     |   |                          |
| 3   | 3 = Moderately feasible                                                                             |                                                                                                                                                                                                                                                                                                                |                                                                                                                                                                                                                                                                                                                         |   |                           |   |                         |   |                           |   |                     |   |                          |
| 4   | 4 = Very feasible                                                                                   |                                                                                                                                                                                                                                                                                                                |                                                                                                                                                                                                                                                                                                                         |   |                           |   |                         |   |                           |   |                     |   |                          |
| 5   | 5 = Extremely feasible                                                                              |                                                                                                                                                                                                                                                                                                                |                                                                                                                                                                                                                                                                                                                         |   |                           |   |                         |   |                           |   |                     |   |                          |
| 182 | <p>section_3_action_1_d</p> <p>Show the field ONLY if:<br/>[section_3_action_1_yes_no] = '1'</p>    | <p>D. How costly (in terms of staff time, equipment, and other) was involving patients/consumers or family members in bundle-related efforts?</p>                                                                                                                                                              | <p>radio, Required</p> <table border="1"> <tr><td>1</td><td>1 = Not at all costly</td></tr> <tr><td>2</td><td>2 = Somewhat costly</td></tr> <tr><td>3</td><td>3 = Moderately costly</td></tr> <tr><td>4</td><td>4 = Very costly</td></tr> <tr><td>5</td><td>5 = Extremely costly</td></tr> </table>                     | 1 | 1 = Not at all costly     | 2 | 2 = Somewhat costly     | 3 | 3 = Moderately costly     | 4 | 4 = Very costly     | 5 | 5 = Extremely costly     |
| 1   | 1 = Not at all costly                                                                               |                                                                                                                                                                                                                                                                                                                |                                                                                                                                                                                                                                                                                                                         |   |                           |   |                         |   |                           |   |                     |   |                          |
| 2   | 2 = Somewhat costly                                                                                 |                                                                                                                                                                                                                                                                                                                |                                                                                                                                                                                                                                                                                                                         |   |                           |   |                         |   |                           |   |                     |   |                          |
| 3   | 3 = Moderately costly                                                                               |                                                                                                                                                                                                                                                                                                                |                                                                                                                                                                                                                                                                                                                         |   |                           |   |                         |   |                           |   |                     |   |                          |
| 4   | 4 = Very costly                                                                                     |                                                                                                                                                                                                                                                                                                                |                                                                                                                                                                                                                                                                                                                         |   |                           |   |                         |   |                           |   |                     |   |                          |
| 5   | 5 = Extremely costly                                                                                |                                                                                                                                                                                                                                                                                                                |                                                                                                                                                                                                                                                                                                                         |   |                           |   |                         |   |                           |   |                     |   |                          |
| 183 | <p>section_3_action_2_yes_no</p>                                                                    | <p>Action 2: Intervene with patients/consumers to enhance uptake and adherence</p> <p>Q: Did your institution develop strategies with patients/consumers to encourage and problem solve around ABCDEF bundle uptake and adherence?</p> <p>If action not used, mark "No" and go to next reflection question</p> | <p>yesno, Required</p> <table border="1"> <tr><td>1</td><td>Yes</td></tr> <tr><td>0</td><td>No</td></tr> </table> <p>Custom alignment: RH</p>                                                                                                                                                                           | 1 | Yes                       | 0 | No                      |   |                           |   |                     |   |                          |
| 1   | Yes                                                                                                 |                                                                                                                                                                                                                                                                                                                |                                                                                                                                                                                                                                                                                                                         |   |                           |   |                         |   |                           |   |                     |   |                          |
| 0   | No                                                                                                  |                                                                                                                                                                                                                                                                                                                |                                                                                                                                                                                                                                                                                                                         |   |                           |   |                         |   |                           |   |                     |   |                          |
| 184 | <p>section_3_action_2_text</p> <p>Show the field ONLY if:<br/>[section_3_action_2_yes_no] = '1'</p> | <p>When reflecting on your ICU's ABCDEF bundle implementation efforts:</p>                                                                                                                                                                                                                                     | <p>descriptive</p>                                                                                                                                                                                                                                                                                                      |   |                           |   |                         |   |                           |   |                     |   |                          |

|     |                                                                                         |                                                                                                                                                                                                                                                                                            |                                                                                                                                                                   |
|-----|-----------------------------------------------------------------------------------------|--------------------------------------------------------------------------------------------------------------------------------------------------------------------------------------------------------------------------------------------------------------------------------------------|-------------------------------------------------------------------------------------------------------------------------------------------------------------------|
| 185 | section_3_action_2_a<br>Show the field ONLY if:<br>[section_3_action_2_yes_no] = '1'    | A. How helpful was intervening with patients/consumers to enhance uptake and adherence for increasing bundle adoption?                                                                                                                                                                     | radio, Required<br>1 1 = Not at all helpful<br>2 2 = Somewhat helpful<br>3 3 = Moderately helpful<br>4 4 = Very helpful<br>5 5 = Extremely helpful                |
| 186 | section_3_action_2_b<br>Show the field ONLY if:<br>[section_3_action_2_yes_no] = '1'    | B. How acceptable was intervening with patients/consumers to enhance bundle uptake and adherence among ICU team members?                                                                                                                                                                   | radio, Required<br>1 1 = Not at all acceptable<br>2 2 = Somewhat acceptable<br>3 3 = Moderately acceptable<br>4 4 = Very acceptable<br>5 5 = Extremely acceptable |
| 187 | section_3_action_2_c<br>Show the field ONLY if:<br>[section_3_action_2_yes_no] = '1'    | C. How feasible was it to intervene with patients/consumers to enhance bundle uptake and adherence?                                                                                                                                                                                        | radio, Required<br>1 1 = Not at all feasible<br>2 2 = Somewhat feasible<br>3 3 = Moderately feasible<br>4 4 = Very feasible<br>5 5 = Extremely feasible           |
| 188 | section_3_action_2_d<br>Show the field ONLY if:<br>[section_3_action_2_yes_no] = '1'    | D. How costly (in terms of staff time, equipment, and other) was intervening with patients/consumers to enhance bundle uptake and adherence?                                                                                                                                               | radio, Required<br>1 1 =Not at all costly<br>2 2 = Somewhat costly<br>3 3 = Moderately costly<br>4 4 = Very costly<br>5 5 = Extremely costly                      |
| 189 | section_3_action_3_yes_no                                                               | Action 3: Increase demand<br><br>Q: Did your institution attempt to influence the market for the ABCDEF bundle to increase competition intensity and to increase the maturity of the market for the ABCDEF bundle?<br><br>If action not used, mark "No" and go to next reflection question | yesno, Required<br>1 Yes<br>0 No<br><br>Custom alignment: RH                                                                                                      |
| 190 | section_3_action_3_text<br>Show the field ONLY if:<br>[section_3_action_3_yes_no] = '1' | When reflecting on your ICU's ABCDEF bundle implementation efforts:                                                                                                                                                                                                                        | descriptive                                                                                                                                                       |
| 191 | section_3_action_3_a<br>Show the field ONLY if:<br>[section_3_action_3_yes_no] = '1'    | A. How helpful was increasing demand in increasing bundle adoption?                                                                                                                                                                                                                        | radio, Required<br>1 1 = Not at all helpful<br>2 2 = Somewhat helpful<br>3 3 = Moderately helpful<br>4 4 = Very helpful<br>5 5 = Extremely helpful                |
| 192 | section_3_action_3_b<br>Show the field ONLY if:<br>[section_3_action_3_yes_no] = '1'    | B. How acceptable was increasing bundle demand among ICU team members?                                                                                                                                                                                                                     | radio, Required<br>1 1 = Not at all acceptable<br>2 2 = Somewhat acceptable<br>3 3 = Moderately acceptable<br>4 4 = Very acceptable<br>5 5 = Extremely acceptable |
| 193 | section_3_action_3_c<br>Show the field ONLY if:<br>[section_3_action_3_yes_no] = '1'    | C. How feasible was it to increase bundle demand?                                                                                                                                                                                                                                          | radio, Required<br>1 1 = Not at all feasible<br>2 2 = Somewhat feasible<br>3 3 = Moderately feasible<br>4 4 = Very feasible<br>5 5 = Extremely feasible           |

|     |                                                                                                     |                                                                                                                                                                                                                                                                                                                                                                                                                  |                                                                                                                                                                                                                                                                                                                         |   |                           |   |                         |   |                           |   |                     |   |                          |
|-----|-----------------------------------------------------------------------------------------------------|------------------------------------------------------------------------------------------------------------------------------------------------------------------------------------------------------------------------------------------------------------------------------------------------------------------------------------------------------------------------------------------------------------------|-------------------------------------------------------------------------------------------------------------------------------------------------------------------------------------------------------------------------------------------------------------------------------------------------------------------------|---|---------------------------|---|-------------------------|---|---------------------------|---|---------------------|---|--------------------------|
| 194 | <p>section_3_action_3_d</p> <p>Show the field ONLY if:<br/>[section_3_action_3_yes_no] = '1'</p>    | <p>D. How costly (in terms of staff time, equipment, and other) was increasing bundle demand?</p>                                                                                                                                                                                                                                                                                                                | <p>radio, Required</p> <table border="1"> <tr><td>1</td><td>1 =Not at all costly</td></tr> <tr><td>2</td><td>2 = Somewhat costly</td></tr> <tr><td>3</td><td>3 = Moderately costly</td></tr> <tr><td>4</td><td>4 = Very costly</td></tr> <tr><td>5</td><td>5 = Extremely costly</td></tr> </table>                      | 1 | 1 =Not at all costly      | 2 | 2 = Somewhat costly     | 3 | 3 = Moderately costly     | 4 | 4 = Very costly     | 5 | 5 = Extremely costly     |
| 1   | 1 =Not at all costly                                                                                |                                                                                                                                                                                                                                                                                                                                                                                                                  |                                                                                                                                                                                                                                                                                                                         |   |                           |   |                         |   |                           |   |                     |   |                          |
| 2   | 2 = Somewhat costly                                                                                 |                                                                                                                                                                                                                                                                                                                                                                                                                  |                                                                                                                                                                                                                                                                                                                         |   |                           |   |                         |   |                           |   |                     |   |                          |
| 3   | 3 = Moderately costly                                                                               |                                                                                                                                                                                                                                                                                                                                                                                                                  |                                                                                                                                                                                                                                                                                                                         |   |                           |   |                         |   |                           |   |                     |   |                          |
| 4   | 4 = Very costly                                                                                     |                                                                                                                                                                                                                                                                                                                                                                                                                  |                                                                                                                                                                                                                                                                                                                         |   |                           |   |                         |   |                           |   |                     |   |                          |
| 5   | 5 = Extremely costly                                                                                |                                                                                                                                                                                                                                                                                                                                                                                                                  |                                                                                                                                                                                                                                                                                                                         |   |                           |   |                         |   |                           |   |                     |   |                          |
| 195 | <p>section_3_action_4_yes_no</p>                                                                    | <p>Action 4: Prepare patients/consumers to be active participants</p> <p>Q: Did your institution prepare patients/consumers to be active in their care, to ask questions, and specifically to inquire about care guidelines, the evidence behind clinical decisions, or about available ABCDEF bundle evidence-supported treatments?</p> <p>If action not used, mark "No" and go to next reflection question</p> | <p>yesno, Required</p> <table border="1"> <tr><td>1</td><td>Yes</td></tr> <tr><td>0</td><td>No</td></tr> </table> <p>Custom alignment: RH</p>                                                                                                                                                                           | 1 | Yes                       | 0 | No                      |   |                           |   |                     |   |                          |
| 1   | Yes                                                                                                 |                                                                                                                                                                                                                                                                                                                                                                                                                  |                                                                                                                                                                                                                                                                                                                         |   |                           |   |                         |   |                           |   |                     |   |                          |
| 0   | No                                                                                                  |                                                                                                                                                                                                                                                                                                                                                                                                                  |                                                                                                                                                                                                                                                                                                                         |   |                           |   |                         |   |                           |   |                     |   |                          |
| 196 | <p>section_3_action_4_text</p> <p>Show the field ONLY if:<br/>[section_3_action_4_yes_no] = '1'</p> | <p>When reflecting on your ICU's ABCDEF bundle implementation efforts:</p>                                                                                                                                                                                                                                                                                                                                       | <p>descriptive</p>                                                                                                                                                                                                                                                                                                      |   |                           |   |                         |   |                           |   |                     |   |                          |
| 197 | <p>section_3_action_4_a</p> <p>Show the field ONLY if:<br/>[section_3_action_4_yes_no] = '1'</p>    | <p>A. How helpful was preparing patients/consumers to be active participants for increasing bundle adoption?</p>                                                                                                                                                                                                                                                                                                 | <p>radio, Required</p> <table border="1"> <tr><td>1</td><td>1 = Not at all helpful</td></tr> <tr><td>2</td><td>2 = Somewhat helpful</td></tr> <tr><td>3</td><td>3 = Moderately helpful</td></tr> <tr><td>4</td><td>4 = Very helpful</td></tr> <tr><td>5</td><td>5 = Extremely helpful</td></tr> </table>                | 1 | 1 = Not at all helpful    | 2 | 2 = Somewhat helpful    | 3 | 3 = Moderately helpful    | 4 | 4 = Very helpful    | 5 | 5 = Extremely helpful    |
| 1   | 1 = Not at all helpful                                                                              |                                                                                                                                                                                                                                                                                                                                                                                                                  |                                                                                                                                                                                                                                                                                                                         |   |                           |   |                         |   |                           |   |                     |   |                          |
| 2   | 2 = Somewhat helpful                                                                                |                                                                                                                                                                                                                                                                                                                                                                                                                  |                                                                                                                                                                                                                                                                                                                         |   |                           |   |                         |   |                           |   |                     |   |                          |
| 3   | 3 = Moderately helpful                                                                              |                                                                                                                                                                                                                                                                                                                                                                                                                  |                                                                                                                                                                                                                                                                                                                         |   |                           |   |                         |   |                           |   |                     |   |                          |
| 4   | 4 = Very helpful                                                                                    |                                                                                                                                                                                                                                                                                                                                                                                                                  |                                                                                                                                                                                                                                                                                                                         |   |                           |   |                         |   |                           |   |                     |   |                          |
| 5   | 5 = Extremely helpful                                                                               |                                                                                                                                                                                                                                                                                                                                                                                                                  |                                                                                                                                                                                                                                                                                                                         |   |                           |   |                         |   |                           |   |                     |   |                          |
| 198 | <p>section_3_action_4_b</p> <p>Show the field ONLY if:<br/>[section_3_action_4_yes_no] = '1'</p>    | <p>B. How acceptable was preparing patients/consumers to be active participants in the bundle among ICU team members?</p>                                                                                                                                                                                                                                                                                        | <p>radio, Required</p> <table border="1"> <tr><td>1</td><td>1 = Not at all acceptable</td></tr> <tr><td>2</td><td>2 = Somewhat acceptable</td></tr> <tr><td>3</td><td>3 = Moderately acceptable</td></tr> <tr><td>4</td><td>4 = Very acceptable</td></tr> <tr><td>5</td><td>5 = Extremely acceptable</td></tr> </table> | 1 | 1 = Not at all acceptable | 2 | 2 = Somewhat acceptable | 3 | 3 = Moderately acceptable | 4 | 4 = Very acceptable | 5 | 5 = Extremely acceptable |
| 1   | 1 = Not at all acceptable                                                                           |                                                                                                                                                                                                                                                                                                                                                                                                                  |                                                                                                                                                                                                                                                                                                                         |   |                           |   |                         |   |                           |   |                     |   |                          |
| 2   | 2 = Somewhat acceptable                                                                             |                                                                                                                                                                                                                                                                                                                                                                                                                  |                                                                                                                                                                                                                                                                                                                         |   |                           |   |                         |   |                           |   |                     |   |                          |
| 3   | 3 = Moderately acceptable                                                                           |                                                                                                                                                                                                                                                                                                                                                                                                                  |                                                                                                                                                                                                                                                                                                                         |   |                           |   |                         |   |                           |   |                     |   |                          |
| 4   | 4 = Very acceptable                                                                                 |                                                                                                                                                                                                                                                                                                                                                                                                                  |                                                                                                                                                                                                                                                                                                                         |   |                           |   |                         |   |                           |   |                     |   |                          |
| 5   | 5 = Extremely acceptable                                                                            |                                                                                                                                                                                                                                                                                                                                                                                                                  |                                                                                                                                                                                                                                                                                                                         |   |                           |   |                         |   |                           |   |                     |   |                          |
| 199 | <p>section_3_action_4_c</p> <p>Show the field ONLY if:<br/>[section_3_action_4_yes_no] = '1'</p>    | <p>C. How feasible was it to prepare patients/consumers to be active participants in the bundle?</p>                                                                                                                                                                                                                                                                                                             | <p>radio, Required</p> <table border="1"> <tr><td>1</td><td>1 = Not at all feasible</td></tr> <tr><td>2</td><td>2 = Somewhat feasible</td></tr> <tr><td>3</td><td>3 = Moderately feasible</td></tr> <tr><td>4</td><td>4 = Very feasible</td></tr> <tr><td>5</td><td>5 = Extremely feasible</td></tr> </table>           | 1 | 1 = Not at all feasible   | 2 | 2 = Somewhat feasible   | 3 | 3 = Moderately feasible   | 4 | 4 = Very feasible   | 5 | 5 = Extremely feasible   |
| 1   | 1 = Not at all feasible                                                                             |                                                                                                                                                                                                                                                                                                                                                                                                                  |                                                                                                                                                                                                                                                                                                                         |   |                           |   |                         |   |                           |   |                     |   |                          |
| 2   | 2 = Somewhat feasible                                                                               |                                                                                                                                                                                                                                                                                                                                                                                                                  |                                                                                                                                                                                                                                                                                                                         |   |                           |   |                         |   |                           |   |                     |   |                          |
| 3   | 3 = Moderately feasible                                                                             |                                                                                                                                                                                                                                                                                                                                                                                                                  |                                                                                                                                                                                                                                                                                                                         |   |                           |   |                         |   |                           |   |                     |   |                          |
| 4   | 4 = Very feasible                                                                                   |                                                                                                                                                                                                                                                                                                                                                                                                                  |                                                                                                                                                                                                                                                                                                                         |   |                           |   |                         |   |                           |   |                     |   |                          |
| 5   | 5 = Extremely feasible                                                                              |                                                                                                                                                                                                                                                                                                                                                                                                                  |                                                                                                                                                                                                                                                                                                                         |   |                           |   |                         |   |                           |   |                     |   |                          |
| 200 | <p>section_3_action_4_d</p> <p>Show the field ONLY if:<br/>[section_3_action_4_yes_no] = '1'</p>    | <p>D. How costly (in terms of staff time, equipment, and other) was preparing patients/consumers to be active participants in the bundle?</p>                                                                                                                                                                                                                                                                    | <p>radio, Required</p> <table border="1"> <tr><td>1</td><td>1 =Not at all costly</td></tr> <tr><td>2</td><td>2 = Somewhat costly</td></tr> <tr><td>3</td><td>3 = Moderately costly</td></tr> <tr><td>4</td><td>4 = Very costly</td></tr> <tr><td>5</td><td>5 = Extremely costly</td></tr> </table>                      | 1 | 1 =Not at all costly      | 2 | 2 = Somewhat costly     | 3 | 3 = Moderately costly     | 4 | 4 = Very costly     | 5 | 5 = Extremely costly     |
| 1   | 1 =Not at all costly                                                                                |                                                                                                                                                                                                                                                                                                                                                                                                                  |                                                                                                                                                                                                                                                                                                                         |   |                           |   |                         |   |                           |   |                     |   |                          |
| 2   | 2 = Somewhat costly                                                                                 |                                                                                                                                                                                                                                                                                                                                                                                                                  |                                                                                                                                                                                                                                                                                                                         |   |                           |   |                         |   |                           |   |                     |   |                          |
| 3   | 3 = Moderately costly                                                                               |                                                                                                                                                                                                                                                                                                                                                                                                                  |                                                                                                                                                                                                                                                                                                                         |   |                           |   |                         |   |                           |   |                     |   |                          |
| 4   | 4 = Very costly                                                                                     |                                                                                                                                                                                                                                                                                                                                                                                                                  |                                                                                                                                                                                                                                                                                                                         |   |                           |   |                         |   |                           |   |                     |   |                          |
| 5   | 5 = Extremely costly                                                                                |                                                                                                                                                                                                                                                                                                                                                                                                                  |                                                                                                                                                                                                                                                                                                                         |   |                           |   |                         |   |                           |   |                     |   |                          |
| 201 | <p>section_3_action_5_yes_no</p>                                                                    | <p>Action 5: Use mass media</p> <p>Q: Did your institution use media to reach large numbers of people to spread the word about the ABCDEF bundle?</p> <p>If action not used, mark "No" and go to next reflection question</p>                                                                                                                                                                                    | <p>yesno, Required</p> <table border="1"> <tr><td>1</td><td>Yes</td></tr> <tr><td>0</td><td>No</td></tr> </table> <p>Custom alignment: RH</p>                                                                                                                                                                           | 1 | Yes                       | 0 | No                      |   |                           |   |                     |   |                          |
| 1   | Yes                                                                                                 |                                                                                                                                                                                                                                                                                                                                                                                                                  |                                                                                                                                                                                                                                                                                                                         |   |                           |   |                         |   |                           |   |                     |   |                          |
| 0   | No                                                                                                  |                                                                                                                                                                                                                                                                                                                                                                                                                  |                                                                                                                                                                                                                                                                                                                         |   |                           |   |                         |   |                           |   |                     |   |                          |
| 202 | <p>section_3_action_5_text</p> <p>Show the field ONLY if:<br/>[section_3_action_5_yes_no] = '1'</p> | <p>When reflecting on your ICU's ABCDEF bundle implementation efforts:</p>                                                                                                                                                                                                                                                                                                                                       | <p>descriptive</p>                                                                                                                                                                                                                                                                                                      |   |                           |   |                         |   |                           |   |                     |   |                          |



|     |                                                                                                     |                                                                                                                                                                                                                                                                                            |                                                                                                                                                                                                                                                                                                                         |   |                           |   |                         |   |                           |   |                     |   |                          |
|-----|-----------------------------------------------------------------------------------------------------|--------------------------------------------------------------------------------------------------------------------------------------------------------------------------------------------------------------------------------------------------------------------------------------------|-------------------------------------------------------------------------------------------------------------------------------------------------------------------------------------------------------------------------------------------------------------------------------------------------------------------------|---|---------------------------|---|-------------------------|---|---------------------------|---|---------------------|---|--------------------------|
| 203 | <p>section_3_action_5_a</p> <p>Show the field ONLY if:<br/>[section_3_action_5_yes_no] = '1'</p>    | A. How helpful was using mass media for increasing bundle adoption?                                                                                                                                                                                                                        | <p>radio, Required</p> <table border="1"> <tr><td>1</td><td>1 = Not at all helpful</td></tr> <tr><td>2</td><td>2 = Somewhat helpful</td></tr> <tr><td>3</td><td>3 = Moderately helpful</td></tr> <tr><td>4</td><td>4 = Very helpful</td></tr> <tr><td>5</td><td>5 = Extremely helpful</td></tr> </table>                | 1 | 1 = Not at all helpful    | 2 | 2 = Somewhat helpful    | 3 | 3 = Moderately helpful    | 4 | 4 = Very helpful    | 5 | 5 = Extremely helpful    |
| 1   | 1 = Not at all helpful                                                                              |                                                                                                                                                                                                                                                                                            |                                                                                                                                                                                                                                                                                                                         |   |                           |   |                         |   |                           |   |                     |   |                          |
| 2   | 2 = Somewhat helpful                                                                                |                                                                                                                                                                                                                                                                                            |                                                                                                                                                                                                                                                                                                                         |   |                           |   |                         |   |                           |   |                     |   |                          |
| 3   | 3 = Moderately helpful                                                                              |                                                                                                                                                                                                                                                                                            |                                                                                                                                                                                                                                                                                                                         |   |                           |   |                         |   |                           |   |                     |   |                          |
| 4   | 4 = Very helpful                                                                                    |                                                                                                                                                                                                                                                                                            |                                                                                                                                                                                                                                                                                                                         |   |                           |   |                         |   |                           |   |                     |   |                          |
| 5   | 5 = Extremely helpful                                                                               |                                                                                                                                                                                                                                                                                            |                                                                                                                                                                                                                                                                                                                         |   |                           |   |                         |   |                           |   |                     |   |                          |
| 204 | <p>section_3_action_5_b</p> <p>Show the field ONLY if:<br/>[section_3_action_5_yes_no] = '1'</p>    | B. How acceptable was using bundle-related mass media among ICU team members?                                                                                                                                                                                                              | <p>radio, Required</p> <table border="1"> <tr><td>1</td><td>1 = Not at all acceptable</td></tr> <tr><td>2</td><td>2 = Somewhat acceptable</td></tr> <tr><td>3</td><td>3 = Moderately acceptable</td></tr> <tr><td>4</td><td>4 = Very acceptable</td></tr> <tr><td>5</td><td>5 = Extremely acceptable</td></tr> </table> | 1 | 1 = Not at all acceptable | 2 | 2 = Somewhat acceptable | 3 | 3 = Moderately acceptable | 4 | 4 = Very acceptable | 5 | 5 = Extremely acceptable |
| 1   | 1 = Not at all acceptable                                                                           |                                                                                                                                                                                                                                                                                            |                                                                                                                                                                                                                                                                                                                         |   |                           |   |                         |   |                           |   |                     |   |                          |
| 2   | 2 = Somewhat acceptable                                                                             |                                                                                                                                                                                                                                                                                            |                                                                                                                                                                                                                                                                                                                         |   |                           |   |                         |   |                           |   |                     |   |                          |
| 3   | 3 = Moderately acceptable                                                                           |                                                                                                                                                                                                                                                                                            |                                                                                                                                                                                                                                                                                                                         |   |                           |   |                         |   |                           |   |                     |   |                          |
| 4   | 4 = Very acceptable                                                                                 |                                                                                                                                                                                                                                                                                            |                                                                                                                                                                                                                                                                                                                         |   |                           |   |                         |   |                           |   |                     |   |                          |
| 5   | 5 = Extremely acceptable                                                                            |                                                                                                                                                                                                                                                                                            |                                                                                                                                                                                                                                                                                                                         |   |                           |   |                         |   |                           |   |                     |   |                          |
| 205 | <p>section_3_action_5_c</p> <p>Show the field ONLY if:<br/>[section_3_action_5_yes_no] = '1'</p>    | C. How feasible was it to use bundle-related mass media?                                                                                                                                                                                                                                   | <p>radio, Required</p> <table border="1"> <tr><td>1</td><td>1 = Not at all feasible</td></tr> <tr><td>2</td><td>2 = Somewhat feasible</td></tr> <tr><td>3</td><td>3 = Moderately feasible</td></tr> <tr><td>4</td><td>4 = Very feasible</td></tr> <tr><td>5</td><td>5 = Extremely feasible</td></tr> </table>           | 1 | 1 = Not at all feasible   | 2 | 2 = Somewhat feasible   | 3 | 3 = Moderately feasible   | 4 | 4 = Very feasible   | 5 | 5 = Extremely feasible   |
| 1   | 1 = Not at all feasible                                                                             |                                                                                                                                                                                                                                                                                            |                                                                                                                                                                                                                                                                                                                         |   |                           |   |                         |   |                           |   |                     |   |                          |
| 2   | 2 = Somewhat feasible                                                                               |                                                                                                                                                                                                                                                                                            |                                                                                                                                                                                                                                                                                                                         |   |                           |   |                         |   |                           |   |                     |   |                          |
| 3   | 3 = Moderately feasible                                                                             |                                                                                                                                                                                                                                                                                            |                                                                                                                                                                                                                                                                                                                         |   |                           |   |                         |   |                           |   |                     |   |                          |
| 4   | 4 = Very feasible                                                                                   |                                                                                                                                                                                                                                                                                            |                                                                                                                                                                                                                                                                                                                         |   |                           |   |                         |   |                           |   |                     |   |                          |
| 5   | 5 = Extremely feasible                                                                              |                                                                                                                                                                                                                                                                                            |                                                                                                                                                                                                                                                                                                                         |   |                           |   |                         |   |                           |   |                     |   |                          |
| 206 | <p>section_3_action_5_d</p> <p>Show the field ONLY if:<br/>[section_3_action_5_yes_no] = '1'</p>    | D. How costly (in terms of staff time, equipment, and other) was using bundle-related mass media?                                                                                                                                                                                          | <p>radio, Required</p> <table border="1"> <tr><td>1</td><td>1 =Not at all costly</td></tr> <tr><td>2</td><td>2 = Somewhat costly</td></tr> <tr><td>3</td><td>3 = Moderately costly</td></tr> <tr><td>4</td><td>4 = Very costly</td></tr> <tr><td>5</td><td>5 = Extremely costly</td></tr> </table>                      | 1 | 1 =Not at all costly      | 2 | 2 = Somewhat costly     | 3 | 3 = Moderately costly     | 4 | 4 = Very costly     | 5 | 5 = Extremely costly     |
| 1   | 1 =Not at all costly                                                                                |                                                                                                                                                                                                                                                                                            |                                                                                                                                                                                                                                                                                                                         |   |                           |   |                         |   |                           |   |                     |   |                          |
| 2   | 2 = Somewhat costly                                                                                 |                                                                                                                                                                                                                                                                                            |                                                                                                                                                                                                                                                                                                                         |   |                           |   |                         |   |                           |   |                     |   |                          |
| 3   | 3 = Moderately costly                                                                               |                                                                                                                                                                                                                                                                                            |                                                                                                                                                                                                                                                                                                                         |   |                           |   |                         |   |                           |   |                     |   |                          |
| 4   | 4 = Very costly                                                                                     |                                                                                                                                                                                                                                                                                            |                                                                                                                                                                                                                                                                                                                         |   |                           |   |                         |   |                           |   |                     |   |                          |
| 5   | 5 = Extremely costly                                                                                |                                                                                                                                                                                                                                                                                            |                                                                                                                                                                                                                                                                                                                         |   |                           |   |                         |   |                           |   |                     |   |                          |
| 207 | section_4_text                                                                                      | <p>Section Header:</p> <p>SECTION 4: USE EVALUATIVE AND ITERATIVE STRATEGIES (10 QUESTIONS)</p>                                                                                                                                                                                            | descriptive                                                                                                                                                                                                                                                                                                             |   |                           |   |                         |   |                           |   |                     |   |                          |
| 208 | section_4_action_1_yes_no                                                                           | <p>Action 1: Obtain and use patients/consumers and family feedback</p> <p>Q: Did your institution develop strategies to increase patient/consumer and family feedback on ABCDEF bundle implementation efforts?</p> <p>If action not used, mark "No" and go to next reflection question</p> | <p>yesno, Required</p> <table border="1"> <tr><td>1</td><td>Yes</td></tr> <tr><td>0</td><td>No</td></tr> </table> <p>Custom alignment: RH</p>                                                                                                                                                                           | 1 | Yes                       | 0 | No                      |   |                           |   |                     |   |                          |
| 1   | Yes                                                                                                 |                                                                                                                                                                                                                                                                                            |                                                                                                                                                                                                                                                                                                                         |   |                           |   |                         |   |                           |   |                     |   |                          |
| 0   | No                                                                                                  |                                                                                                                                                                                                                                                                                            |                                                                                                                                                                                                                                                                                                                         |   |                           |   |                         |   |                           |   |                     |   |                          |
| 209 | <p>section_4_action_1_text</p> <p>Show the field ONLY if:<br/>[section_4_action_1_yes_no] = '1'</p> | When reflecting on your ICU's ABCDEF bundle implementation efforts:                                                                                                                                                                                                                        | descriptive                                                                                                                                                                                                                                                                                                             |   |                           |   |                         |   |                           |   |                     |   |                          |
| 210 | <p>section_4_action_1_a</p> <p>Show the field ONLY if:<br/>[section_4_action_1_yes_no] = '1'</p>    | A. How helpful was obtaining and using patients/consumers and family feedback for increasing bundle adoption?                                                                                                                                                                              | <p>radio, Required</p> <table border="1"> <tr><td>1</td><td>1 = Not at all helpful</td></tr> <tr><td>2</td><td>2 = Somewhat helpful</td></tr> <tr><td>3</td><td>3 = Moderately helpful</td></tr> <tr><td>4</td><td>4 = Very helpful</td></tr> <tr><td>5</td><td>5 = Extremely helpful</td></tr> </table>                | 1 | 1 = Not at all helpful    | 2 | 2 = Somewhat helpful    | 3 | 3 = Moderately helpful    | 4 | 4 = Very helpful    | 5 | 5 = Extremely helpful    |
| 1   | 1 = Not at all helpful                                                                              |                                                                                                                                                                                                                                                                                            |                                                                                                                                                                                                                                                                                                                         |   |                           |   |                         |   |                           |   |                     |   |                          |
| 2   | 2 = Somewhat helpful                                                                                |                                                                                                                                                                                                                                                                                            |                                                                                                                                                                                                                                                                                                                         |   |                           |   |                         |   |                           |   |                     |   |                          |
| 3   | 3 = Moderately helpful                                                                              |                                                                                                                                                                                                                                                                                            |                                                                                                                                                                                                                                                                                                                         |   |                           |   |                         |   |                           |   |                     |   |                          |
| 4   | 4 = Very helpful                                                                                    |                                                                                                                                                                                                                                                                                            |                                                                                                                                                                                                                                                                                                                         |   |                           |   |                         |   |                           |   |                     |   |                          |
| 5   | 5 = Extremely helpful                                                                               |                                                                                                                                                                                                                                                                                            |                                                                                                                                                                                                                                                                                                                         |   |                           |   |                         |   |                           |   |                     |   |                          |
| 211 | <p>section_4_action_1_b</p> <p>Show the field ONLY if:<br/>[section_4_action_1_yes_no] = '1'</p>    | B. How acceptable was obtaining and using patients/consumers and family bundle-related feedback among ICU team members?                                                                                                                                                                    | <p>radio, Required</p> <table border="1"> <tr><td>1</td><td>1 = Not at all acceptable</td></tr> <tr><td>2</td><td>2 = Somewhat acceptable</td></tr> <tr><td>3</td><td>3 = Moderately acceptable</td></tr> <tr><td>4</td><td>4 = Very acceptable</td></tr> <tr><td>5</td><td>5 = Extremely acceptable</td></tr> </table> | 1 | 1 = Not at all acceptable | 2 | 2 = Somewhat acceptable | 3 | 3 = Moderately acceptable | 4 | 4 = Very acceptable | 5 | 5 = Extremely acceptable |
| 1   | 1 = Not at all acceptable                                                                           |                                                                                                                                                                                                                                                                                            |                                                                                                                                                                                                                                                                                                                         |   |                           |   |                         |   |                           |   |                     |   |                          |
| 2   | 2 = Somewhat acceptable                                                                             |                                                                                                                                                                                                                                                                                            |                                                                                                                                                                                                                                                                                                                         |   |                           |   |                         |   |                           |   |                     |   |                          |
| 3   | 3 = Moderately acceptable                                                                           |                                                                                                                                                                                                                                                                                            |                                                                                                                                                                                                                                                                                                                         |   |                           |   |                         |   |                           |   |                     |   |                          |
| 4   | 4 = Very acceptable                                                                                 |                                                                                                                                                                                                                                                                                            |                                                                                                                                                                                                                                                                                                                         |   |                           |   |                         |   |                           |   |                     |   |                          |
| 5   | 5 = Extremely acceptable                                                                            |                                                                                                                                                                                                                                                                                            |                                                                                                                                                                                                                                                                                                                         |   |                           |   |                         |   |                           |   |                     |   |                          |

|     |                                                                                                     |                                                                                                                                                                                                                                                                                                        |                                                                                                                                                                                                                                                                                                                         |   |                           |   |                         |   |                           |   |                     |   |                          |
|-----|-----------------------------------------------------------------------------------------------------|--------------------------------------------------------------------------------------------------------------------------------------------------------------------------------------------------------------------------------------------------------------------------------------------------------|-------------------------------------------------------------------------------------------------------------------------------------------------------------------------------------------------------------------------------------------------------------------------------------------------------------------------|---|---------------------------|---|-------------------------|---|---------------------------|---|---------------------|---|--------------------------|
| 212 | <p>section_4_action_1_c</p> <p>Show the field ONLY if:<br/>[section_4_action_1_yes_no] = '1'</p>    | <p>C. How feasible was it to obtain and use patients/consumers and family bundle-related feedback?</p>                                                                                                                                                                                                 | <p>radio, Required</p> <table border="1"> <tr><td>1</td><td>1 = Not at all feasible</td></tr> <tr><td>2</td><td>2 = Somewhat feasible</td></tr> <tr><td>3</td><td>3 = Moderately feasible</td></tr> <tr><td>4</td><td>4 = Very feasible</td></tr> <tr><td>5</td><td>5 = Extremely feasible</td></tr> </table>           | 1 | 1 = Not at all feasible   | 2 | 2 = Somewhat feasible   | 3 | 3 = Moderately feasible   | 4 | 4 = Very feasible   | 5 | 5 = Extremely feasible   |
| 1   | 1 = Not at all feasible                                                                             |                                                                                                                                                                                                                                                                                                        |                                                                                                                                                                                                                                                                                                                         |   |                           |   |                         |   |                           |   |                     |   |                          |
| 2   | 2 = Somewhat feasible                                                                               |                                                                                                                                                                                                                                                                                                        |                                                                                                                                                                                                                                                                                                                         |   |                           |   |                         |   |                           |   |                     |   |                          |
| 3   | 3 = Moderately feasible                                                                             |                                                                                                                                                                                                                                                                                                        |                                                                                                                                                                                                                                                                                                                         |   |                           |   |                         |   |                           |   |                     |   |                          |
| 4   | 4 = Very feasible                                                                                   |                                                                                                                                                                                                                                                                                                        |                                                                                                                                                                                                                                                                                                                         |   |                           |   |                         |   |                           |   |                     |   |                          |
| 5   | 5 = Extremely feasible                                                                              |                                                                                                                                                                                                                                                                                                        |                                                                                                                                                                                                                                                                                                                         |   |                           |   |                         |   |                           |   |                     |   |                          |
| 213 | <p>section_4_action_1_d</p> <p>Show the field ONLY if:<br/>[section_4_action_1_yes_no] = '1'</p>    | <p>D. How costly (in terms of staff time, equipment, and other) was obtaining and using patients/consumers and family bundle-related feedback?</p>                                                                                                                                                     | <p>radio, Required</p> <table border="1"> <tr><td>1</td><td>1 =Not at all costly</td></tr> <tr><td>2</td><td>2 = Somewhat costly</td></tr> <tr><td>3</td><td>3 = Moderately costly</td></tr> <tr><td>4</td><td>4 = Very costly</td></tr> <tr><td>5</td><td>5 = Extremely costly</td></tr> </table>                      | 1 | 1 =Not at all costly      | 2 | 2 = Somewhat costly     | 3 | 3 = Moderately costly     | 4 | 4 = Very costly     | 5 | 5 = Extremely costly     |
| 1   | 1 =Not at all costly                                                                                |                                                                                                                                                                                                                                                                                                        |                                                                                                                                                                                                                                                                                                                         |   |                           |   |                         |   |                           |   |                     |   |                          |
| 2   | 2 = Somewhat costly                                                                                 |                                                                                                                                                                                                                                                                                                        |                                                                                                                                                                                                                                                                                                                         |   |                           |   |                         |   |                           |   |                     |   |                          |
| 3   | 3 = Moderately costly                                                                               |                                                                                                                                                                                                                                                                                                        |                                                                                                                                                                                                                                                                                                                         |   |                           |   |                         |   |                           |   |                     |   |                          |
| 4   | 4 = Very costly                                                                                     |                                                                                                                                                                                                                                                                                                        |                                                                                                                                                                                                                                                                                                                         |   |                           |   |                         |   |                           |   |                     |   |                          |
| 5   | 5 = Extremely costly                                                                                |                                                                                                                                                                                                                                                                                                        |                                                                                                                                                                                                                                                                                                                         |   |                           |   |                         |   |                           |   |                     |   |                          |
| 214 | <p>section_4_action_2_yes_no</p>                                                                    | <p>Action 2: Purposely reexamine the implementation</p> <p>Q: Did your institution monitor ABCDEF bundle progress and adjust clinical practices and implementation strategies to continuously improve the quality of care?</p> <p>If action not used, mark "No" and go to next reflection question</p> | <p>yesno, Required</p> <table border="1"> <tr><td>1</td><td>Yes</td></tr> <tr><td>0</td><td>No</td></tr> </table> <p>Custom alignment: RH</p>                                                                                                                                                                           | 1 | Yes                       | 0 | No                      |   |                           |   |                     |   |                          |
| 1   | Yes                                                                                                 |                                                                                                                                                                                                                                                                                                        |                                                                                                                                                                                                                                                                                                                         |   |                           |   |                         |   |                           |   |                     |   |                          |
| 0   | No                                                                                                  |                                                                                                                                                                                                                                                                                                        |                                                                                                                                                                                                                                                                                                                         |   |                           |   |                         |   |                           |   |                     |   |                          |
| 215 | <p>section_4_action_2_text</p> <p>Show the field ONLY if:<br/>[section_4_action_2_yes_no] = '1'</p> | <p>When reflecting on your ICU's ABCDEF bundle implementation efforts:</p>                                                                                                                                                                                                                             | <p>descriptive</p>                                                                                                                                                                                                                                                                                                      |   |                           |   |                         |   |                           |   |                     |   |                          |
| 216 | <p>section_4_action_2_a</p> <p>Show the field ONLY if:<br/>[section_4_action_2_yes_no] = '1'</p>    | <p>A. How helpful was purposely reexamining the implementation for increasing bundle adoption?</p>                                                                                                                                                                                                     | <p>radio, Required</p> <table border="1"> <tr><td>1</td><td>1 = Not at all helpful</td></tr> <tr><td>2</td><td>2 = Somewhat helpful</td></tr> <tr><td>3</td><td>3 = Moderately helpful</td></tr> <tr><td>4</td><td>4 = Very helpful</td></tr> <tr><td>5</td><td>5 = Extremely helpful</td></tr> </table>                | 1 | 1 = Not at all helpful    | 2 | 2 = Somewhat helpful    | 3 | 3 = Moderately helpful    | 4 | 4 = Very helpful    | 5 | 5 = Extremely helpful    |
| 1   | 1 = Not at all helpful                                                                              |                                                                                                                                                                                                                                                                                                        |                                                                                                                                                                                                                                                                                                                         |   |                           |   |                         |   |                           |   |                     |   |                          |
| 2   | 2 = Somewhat helpful                                                                                |                                                                                                                                                                                                                                                                                                        |                                                                                                                                                                                                                                                                                                                         |   |                           |   |                         |   |                           |   |                     |   |                          |
| 3   | 3 = Moderately helpful                                                                              |                                                                                                                                                                                                                                                                                                        |                                                                                                                                                                                                                                                                                                                         |   |                           |   |                         |   |                           |   |                     |   |                          |
| 4   | 4 = Very helpful                                                                                    |                                                                                                                                                                                                                                                                                                        |                                                                                                                                                                                                                                                                                                                         |   |                           |   |                         |   |                           |   |                     |   |                          |
| 5   | 5 = Extremely helpful                                                                               |                                                                                                                                                                                                                                                                                                        |                                                                                                                                                                                                                                                                                                                         |   |                           |   |                         |   |                           |   |                     |   |                          |
| 217 | <p>section_4_action_2_b</p> <p>Show the field ONLY if:<br/>[section_4_action_2_yes_no] = '1'</p>    | <p>B. How acceptable was purposely reexamining bundle implementation among ICU team members?</p>                                                                                                                                                                                                       | <p>radio, Required</p> <table border="1"> <tr><td>1</td><td>1 = Not at all acceptable</td></tr> <tr><td>2</td><td>2 = Somewhat acceptable</td></tr> <tr><td>3</td><td>3 = Moderately acceptable</td></tr> <tr><td>4</td><td>4 = Very acceptable</td></tr> <tr><td>5</td><td>5 = Extremely acceptable</td></tr> </table> | 1 | 1 = Not at all acceptable | 2 | 2 = Somewhat acceptable | 3 | 3 = Moderately acceptable | 4 | 4 = Very acceptable | 5 | 5 = Extremely acceptable |
| 1   | 1 = Not at all acceptable                                                                           |                                                                                                                                                                                                                                                                                                        |                                                                                                                                                                                                                                                                                                                         |   |                           |   |                         |   |                           |   |                     |   |                          |
| 2   | 2 = Somewhat acceptable                                                                             |                                                                                                                                                                                                                                                                                                        |                                                                                                                                                                                                                                                                                                                         |   |                           |   |                         |   |                           |   |                     |   |                          |
| 3   | 3 = Moderately acceptable                                                                           |                                                                                                                                                                                                                                                                                                        |                                                                                                                                                                                                                                                                                                                         |   |                           |   |                         |   |                           |   |                     |   |                          |
| 4   | 4 = Very acceptable                                                                                 |                                                                                                                                                                                                                                                                                                        |                                                                                                                                                                                                                                                                                                                         |   |                           |   |                         |   |                           |   |                     |   |                          |
| 5   | 5 = Extremely acceptable                                                                            |                                                                                                                                                                                                                                                                                                        |                                                                                                                                                                                                                                                                                                                         |   |                           |   |                         |   |                           |   |                     |   |                          |
| 218 | <p>section_4_action_2_c</p> <p>Show the field ONLY if:<br/>[section_4_action_2_yes_no] = '1'</p>    | <p>C. How feasible was it to purposely reexamine bundle implementation?</p>                                                                                                                                                                                                                            | <p>radio, Required</p> <table border="1"> <tr><td>1</td><td>1 = Not at all feasible</td></tr> <tr><td>2</td><td>2 = Somewhat feasible</td></tr> <tr><td>3</td><td>3 = Moderately feasible</td></tr> <tr><td>4</td><td>4 = Very feasible</td></tr> <tr><td>5</td><td>5 = Extremely feasible</td></tr> </table>           | 1 | 1 = Not at all feasible   | 2 | 2 = Somewhat feasible   | 3 | 3 = Moderately feasible   | 4 | 4 = Very feasible   | 5 | 5 = Extremely feasible   |
| 1   | 1 = Not at all feasible                                                                             |                                                                                                                                                                                                                                                                                                        |                                                                                                                                                                                                                                                                                                                         |   |                           |   |                         |   |                           |   |                     |   |                          |
| 2   | 2 = Somewhat feasible                                                                               |                                                                                                                                                                                                                                                                                                        |                                                                                                                                                                                                                                                                                                                         |   |                           |   |                         |   |                           |   |                     |   |                          |
| 3   | 3 = Moderately feasible                                                                             |                                                                                                                                                                                                                                                                                                        |                                                                                                                                                                                                                                                                                                                         |   |                           |   |                         |   |                           |   |                     |   |                          |
| 4   | 4 = Very feasible                                                                                   |                                                                                                                                                                                                                                                                                                        |                                                                                                                                                                                                                                                                                                                         |   |                           |   |                         |   |                           |   |                     |   |                          |
| 5   | 5 = Extremely feasible                                                                              |                                                                                                                                                                                                                                                                                                        |                                                                                                                                                                                                                                                                                                                         |   |                           |   |                         |   |                           |   |                     |   |                          |
| 219 | <p>section_4_action_2_d</p> <p>Show the field ONLY if:<br/>[section_4_action_2_yes_no] = '1'</p>    | <p>D. How costly (in terms of staff time, equipment, and other) was purposely reexamining bundle implementation?</p>                                                                                                                                                                                   | <p>radio, Required</p> <table border="1"> <tr><td>1</td><td>1 =Not at all costly</td></tr> <tr><td>2</td><td>2 = Somewhat costly</td></tr> <tr><td>3</td><td>3 = Moderately costly</td></tr> <tr><td>4</td><td>4 = Very costly</td></tr> <tr><td>5</td><td>5 = Extremely costly</td></tr> </table>                      | 1 | 1 =Not at all costly      | 2 | 2 = Somewhat costly     | 3 | 3 = Moderately costly     | 4 | 4 = Very costly     | 5 | 5 = Extremely costly     |
| 1   | 1 =Not at all costly                                                                                |                                                                                                                                                                                                                                                                                                        |                                                                                                                                                                                                                                                                                                                         |   |                           |   |                         |   |                           |   |                     |   |                          |
| 2   | 2 = Somewhat costly                                                                                 |                                                                                                                                                                                                                                                                                                        |                                                                                                                                                                                                                                                                                                                         |   |                           |   |                         |   |                           |   |                     |   |                          |
| 3   | 3 = Moderately costly                                                                               |                                                                                                                                                                                                                                                                                                        |                                                                                                                                                                                                                                                                                                                         |   |                           |   |                         |   |                           |   |                     |   |                          |
| 4   | 4 = Very costly                                                                                     |                                                                                                                                                                                                                                                                                                        |                                                                                                                                                                                                                                                                                                                         |   |                           |   |                         |   |                           |   |                     |   |                          |
| 5   | 5 = Extremely costly                                                                                |                                                                                                                                                                                                                                                                                                        |                                                                                                                                                                                                                                                                                                                         |   |                           |   |                         |   |                           |   |                     |   |                          |
| 220 | <p>section_4_action_3_yes_no</p>                                                                    | <p>Action 3: Conduct local needs assessment</p> <p>Q: Did your institution collect and analyze data related to the need for the ABCDEF bundle?</p> <p>If action not used, mark "No" and go to next reflection question</p>                                                                             | <p>yesno, Required</p> <table border="1"> <tr><td>1</td><td>Yes</td></tr> <tr><td>0</td><td>No</td></tr> </table> <p>Custom alignment: RH</p>                                                                                                                                                                           | 1 | Yes                       | 0 | No                      |   |                           |   |                     |   |                          |
| 1   | Yes                                                                                                 |                                                                                                                                                                                                                                                                                                        |                                                                                                                                                                                                                                                                                                                         |   |                           |   |                         |   |                           |   |                     |   |                          |
| 0   | No                                                                                                  |                                                                                                                                                                                                                                                                                                        |                                                                                                                                                                                                                                                                                                                         |   |                           |   |                         |   |                           |   |                     |   |                          |
| 221 | <p>section_4_action_3_text</p> <p>Show the field ONLY if:<br/>[section_4_action_3_yes_no] = '1'</p> | <p>When reflecting on your ICU's ABCDEF bundle implementation efforts:</p>                                                                                                                                                                                                                             | <p>descriptive</p>                                                                                                                                                                                                                                                                                                      |   |                           |   |                         |   |                           |   |                     |   |                          |

|     |                                                                                         |                                                                                                                                                                                                                                                                                                |                                                                                                                                                                   |
|-----|-----------------------------------------------------------------------------------------|------------------------------------------------------------------------------------------------------------------------------------------------------------------------------------------------------------------------------------------------------------------------------------------------|-------------------------------------------------------------------------------------------------------------------------------------------------------------------|
| 222 | section_4_action_3_a<br>Show the field ONLY if:<br>[section_4_action_3_yes_no] = '1'    | A. How helpful was conducting a local needs assessment for increasing bundle adoption?                                                                                                                                                                                                         | radio, Required<br>1 1 = Not at all helpful<br>2 2 = Somewhat helpful<br>3 3 = Moderately helpful<br>4 4 = Very helpful<br>5 5 = Extremely helpful                |
| 223 | section_4_action_3_b<br>Show the field ONLY if:<br>[section_4_action_3_yes_no] = '1'    | B. How acceptable was conducting a local bundle-related needs assessment among ICU team members?                                                                                                                                                                                               | radio, Required<br>1 1 = Not at all acceptable<br>2 2 = Somewhat acceptable<br>3 3 = Moderately acceptable<br>4 4 = Very acceptable<br>5 5 = Extremely acceptable |
| 224 | section_4_action_3_c<br>Show the field ONLY if:<br>[section_4_action_3_yes_no] = '1'    | C. How feasible was it to conduct a local bundle-related needs assessment?                                                                                                                                                                                                                     | radio, Required<br>1 1 = Not at all feasible<br>2 2 = Somewhat feasible<br>3 3 = Moderately feasible<br>4 4 = Very feasible<br>5 5 = Extremely feasible           |
| 225 | section_4_action_3_d<br>Show the field ONLY if:<br>[section_4_action_3_yes_no] = '1'    | D. How costly (in terms of staff time, equipment, and other) was conducting a local bundle-related needs assessment?                                                                                                                                                                           | radio, Required<br>1 1 =Not at all costly<br>2 2 = Somewhat costly<br>3 3 = Moderately costly<br>4 4 = Very costly<br>5 5 = Extremely costly                      |
| 226 | section_4_action_4_yes_no                                                               | Action 4: Stage implementation scale-up<br><br>Q: Did your institution phase ABCDEF bundle implementation efforts by starting with small pilots or demonstration projects and gradually move to a system wide rollout?<br><br>If action not used, mark "No" and go to next reflection question | yesno, Required<br>1 Yes<br>0 No<br><br>Custom alignment: RH                                                                                                      |
| 227 | section_4_action_4_text<br>Show the field ONLY if:<br>[section_4_action_4_yes_no] = '1' | When reflecting on your ICU's ABCDEF bundle implementation efforts:                                                                                                                                                                                                                            | descriptive                                                                                                                                                       |
| 228 | section_4_action_4_a<br>Show the field ONLY if:<br>[section_4_action_4_yes_no] = '1'    | A. How helpful was staging implementation scale up for increasing bundle adoption?                                                                                                                                                                                                             | radio, Required<br>1 1 = Not at all helpful<br>2 2 = Somewhat helpful<br>3 3 = Moderately helpful<br>4 4 = Very helpful<br>5 5 = Extremely helpful                |
| 229 | section_4_action_4_b<br>Show the field ONLY if:<br>[section_4_action_4_yes_no] = '1'    | B. How acceptable was staging bundle implementation scale-up among ICU team members?                                                                                                                                                                                                           | radio, Required<br>1 1 = Not at all acceptable<br>2 2 = Somewhat acceptable<br>3 3 = Moderately acceptable<br>4 4 = Very acceptable<br>5 5 = Extremely acceptable |
| 230 | section_4_action_4_c<br>Show the field ONLY if:<br>[section_4_action_4_yes_no] = '1'    | C. How feasible was it to stage bundle implementation scale-up?                                                                                                                                                                                                                                | radio, Required<br>1 1 = Not at all feasible<br>2 2 = Somewhat feasible<br>3 3 = Moderately feasible<br>4 4 = Very feasible<br>5 5 = Extremely feasible           |

|     |                                                                                                     |                                                                                                                                                                                                                                                                                                                                                                                                                                                                                                                  |                                                                                                                                                                                                                                                                                                                         |   |                           |   |                         |   |                           |   |                     |   |                          |
|-----|-----------------------------------------------------------------------------------------------------|------------------------------------------------------------------------------------------------------------------------------------------------------------------------------------------------------------------------------------------------------------------------------------------------------------------------------------------------------------------------------------------------------------------------------------------------------------------------------------------------------------------|-------------------------------------------------------------------------------------------------------------------------------------------------------------------------------------------------------------------------------------------------------------------------------------------------------------------------|---|---------------------------|---|-------------------------|---|---------------------------|---|---------------------|---|--------------------------|
| 231 | <p>section_4_action_4_d</p> <p>Show the field ONLY if:<br/>[section_4_action_4_yes_no] = '1'</p>    | <p>D. How costly (in terms of staff time, equipment, and other) was staging bundle implementation scale-up?</p>                                                                                                                                                                                                                                                                                                                                                                                                  | <p>radio, Required</p> <table border="1"> <tr><td>1</td><td>1 = Not at all costly</td></tr> <tr><td>2</td><td>2 = Somewhat costly</td></tr> <tr><td>3</td><td>3 = Moderately costly</td></tr> <tr><td>4</td><td>4 = Very costly</td></tr> <tr><td>5</td><td>5 = Extremely costly</td></tr> </table>                     | 1 | 1 = Not at all costly     | 2 | 2 = Somewhat costly     | 3 | 3 = Moderately costly     | 4 | 4 = Very costly     | 5 | 5 = Extremely costly     |
| 1   | 1 = Not at all costly                                                                               |                                                                                                                                                                                                                                                                                                                                                                                                                                                                                                                  |                                                                                                                                                                                                                                                                                                                         |   |                           |   |                         |   |                           |   |                     |   |                          |
| 2   | 2 = Somewhat costly                                                                                 |                                                                                                                                                                                                                                                                                                                                                                                                                                                                                                                  |                                                                                                                                                                                                                                                                                                                         |   |                           |   |                         |   |                           |   |                     |   |                          |
| 3   | 3 = Moderately costly                                                                               |                                                                                                                                                                                                                                                                                                                                                                                                                                                                                                                  |                                                                                                                                                                                                                                                                                                                         |   |                           |   |                         |   |                           |   |                     |   |                          |
| 4   | 4 = Very costly                                                                                     |                                                                                                                                                                                                                                                                                                                                                                                                                                                                                                                  |                                                                                                                                                                                                                                                                                                                         |   |                           |   |                         |   |                           |   |                     |   |                          |
| 5   | 5 = Extremely costly                                                                                |                                                                                                                                                                                                                                                                                                                                                                                                                                                                                                                  |                                                                                                                                                                                                                                                                                                                         |   |                           |   |                         |   |                           |   |                     |   |                          |
| 232 | <p>section_4_action_5_yes_no</p>                                                                    | <p>Action 5: Conduct cyclical small tests of change</p> <p>Q: Did your institution implement changes in a cyclical fashion using small tests of change before taking the ABCDEF bundle changes system-wide? Tests of change benefit from systematic measurement and results of the tests of change are studied for insights on how to do better. This process continues serially over time, and refinement is added with each cycle.</p> <p>If action not used, mark "No" and go to next reflection question</p> | <p>yesno, Required</p> <table border="1"> <tr><td>1</td><td>Yes</td></tr> <tr><td>0</td><td>No</td></tr> </table> <p>Custom alignment: RH</p>                                                                                                                                                                           | 1 | Yes                       | 0 | No                      |   |                           |   |                     |   |                          |
| 1   | Yes                                                                                                 |                                                                                                                                                                                                                                                                                                                                                                                                                                                                                                                  |                                                                                                                                                                                                                                                                                                                         |   |                           |   |                         |   |                           |   |                     |   |                          |
| 0   | No                                                                                                  |                                                                                                                                                                                                                                                                                                                                                                                                                                                                                                                  |                                                                                                                                                                                                                                                                                                                         |   |                           |   |                         |   |                           |   |                     |   |                          |
| 233 | <p>section_4_action_5_text</p> <p>Show the field ONLY if:<br/>[section_4_action_5_yes_no] = '1'</p> | <p>When reflecting on your ICU's ABCDEF bundle implementation efforts:</p>                                                                                                                                                                                                                                                                                                                                                                                                                                       | <p>descriptive</p>                                                                                                                                                                                                                                                                                                      |   |                           |   |                         |   |                           |   |                     |   |                          |
| 234 | <p>section_4_action_5_a</p> <p>Show the field ONLY if:<br/>[section_4_action_5_yes_no] = '1'</p>    | <p>A. How helpful was conducting small tests of change for increasing bundle adoption?</p>                                                                                                                                                                                                                                                                                                                                                                                                                       | <p>radio, Required</p> <table border="1"> <tr><td>1</td><td>1 = Not at all helpful</td></tr> <tr><td>2</td><td>2 = Somewhat helpful</td></tr> <tr><td>3</td><td>3 = Moderately helpful</td></tr> <tr><td>4</td><td>4 = Very helpful</td></tr> <tr><td>5</td><td>5 = Extremely helpful</td></tr> </table>                | 1 | 1 = Not at all helpful    | 2 | 2 = Somewhat helpful    | 3 | 3 = Moderately helpful    | 4 | 4 = Very helpful    | 5 | 5 = Extremely helpful    |
| 1   | 1 = Not at all helpful                                                                              |                                                                                                                                                                                                                                                                                                                                                                                                                                                                                                                  |                                                                                                                                                                                                                                                                                                                         |   |                           |   |                         |   |                           |   |                     |   |                          |
| 2   | 2 = Somewhat helpful                                                                                |                                                                                                                                                                                                                                                                                                                                                                                                                                                                                                                  |                                                                                                                                                                                                                                                                                                                         |   |                           |   |                         |   |                           |   |                     |   |                          |
| 3   | 3 = Moderately helpful                                                                              |                                                                                                                                                                                                                                                                                                                                                                                                                                                                                                                  |                                                                                                                                                                                                                                                                                                                         |   |                           |   |                         |   |                           |   |                     |   |                          |
| 4   | 4 = Very helpful                                                                                    |                                                                                                                                                                                                                                                                                                                                                                                                                                                                                                                  |                                                                                                                                                                                                                                                                                                                         |   |                           |   |                         |   |                           |   |                     |   |                          |
| 5   | 5 = Extremely helpful                                                                               |                                                                                                                                                                                                                                                                                                                                                                                                                                                                                                                  |                                                                                                                                                                                                                                                                                                                         |   |                           |   |                         |   |                           |   |                     |   |                          |
| 235 | <p>section_4_action_5_b</p> <p>Show the field ONLY if:<br/>[section_4_action_5_yes_no] = '1'</p>    | <p>B. How acceptable was conducting small tests of bundle-related change among ICU team members?</p>                                                                                                                                                                                                                                                                                                                                                                                                             | <p>radio, Required</p> <table border="1"> <tr><td>1</td><td>1 = Not at all acceptable</td></tr> <tr><td>2</td><td>2 = Somewhat acceptable</td></tr> <tr><td>3</td><td>3 = Moderately acceptable</td></tr> <tr><td>4</td><td>4 = Very acceptable</td></tr> <tr><td>5</td><td>5 = Extremely acceptable</td></tr> </table> | 1 | 1 = Not at all acceptable | 2 | 2 = Somewhat acceptable | 3 | 3 = Moderately acceptable | 4 | 4 = Very acceptable | 5 | 5 = Extremely acceptable |
| 1   | 1 = Not at all acceptable                                                                           |                                                                                                                                                                                                                                                                                                                                                                                                                                                                                                                  |                                                                                                                                                                                                                                                                                                                         |   |                           |   |                         |   |                           |   |                     |   |                          |
| 2   | 2 = Somewhat acceptable                                                                             |                                                                                                                                                                                                                                                                                                                                                                                                                                                                                                                  |                                                                                                                                                                                                                                                                                                                         |   |                           |   |                         |   |                           |   |                     |   |                          |
| 3   | 3 = Moderately acceptable                                                                           |                                                                                                                                                                                                                                                                                                                                                                                                                                                                                                                  |                                                                                                                                                                                                                                                                                                                         |   |                           |   |                         |   |                           |   |                     |   |                          |
| 4   | 4 = Very acceptable                                                                                 |                                                                                                                                                                                                                                                                                                                                                                                                                                                                                                                  |                                                                                                                                                                                                                                                                                                                         |   |                           |   |                         |   |                           |   |                     |   |                          |
| 5   | 5 = Extremely acceptable                                                                            |                                                                                                                                                                                                                                                                                                                                                                                                                                                                                                                  |                                                                                                                                                                                                                                                                                                                         |   |                           |   |                         |   |                           |   |                     |   |                          |
| 236 | <p>section_4_action_5_c</p> <p>Show the field ONLY if:<br/>[section_4_action_5_yes_no] = '1'</p>    | <p>C. How feasible was it to conduct small tests of bundle-related change?</p>                                                                                                                                                                                                                                                                                                                                                                                                                                   | <p>radio, Required</p> <table border="1"> <tr><td>1</td><td>1 = Not at all feasible</td></tr> <tr><td>2</td><td>2 = Somewhat feasible</td></tr> <tr><td>3</td><td>3 = Moderately feasible</td></tr> <tr><td>4</td><td>4 = Very feasible</td></tr> <tr><td>5</td><td>5 = Extremely feasible</td></tr> </table>           | 1 | 1 = Not at all feasible   | 2 | 2 = Somewhat feasible   | 3 | 3 = Moderately feasible   | 4 | 4 = Very feasible   | 5 | 5 = Extremely feasible   |
| 1   | 1 = Not at all feasible                                                                             |                                                                                                                                                                                                                                                                                                                                                                                                                                                                                                                  |                                                                                                                                                                                                                                                                                                                         |   |                           |   |                         |   |                           |   |                     |   |                          |
| 2   | 2 = Somewhat feasible                                                                               |                                                                                                                                                                                                                                                                                                                                                                                                                                                                                                                  |                                                                                                                                                                                                                                                                                                                         |   |                           |   |                         |   |                           |   |                     |   |                          |
| 3   | 3 = Moderately feasible                                                                             |                                                                                                                                                                                                                                                                                                                                                                                                                                                                                                                  |                                                                                                                                                                                                                                                                                                                         |   |                           |   |                         |   |                           |   |                     |   |                          |
| 4   | 4 = Very feasible                                                                                   |                                                                                                                                                                                                                                                                                                                                                                                                                                                                                                                  |                                                                                                                                                                                                                                                                                                                         |   |                           |   |                         |   |                           |   |                     |   |                          |
| 5   | 5 = Extremely feasible                                                                              |                                                                                                                                                                                                                                                                                                                                                                                                                                                                                                                  |                                                                                                                                                                                                                                                                                                                         |   |                           |   |                         |   |                           |   |                     |   |                          |
| 237 | <p>section_4_action_5_d</p> <p>Show the field ONLY if:<br/>[section_4_action_5_yes_no] = '1'</p>    | <p>D. How costly (in terms of staff time, equipment, and other) was conducting small tests of bundle-related change?</p>                                                                                                                                                                                                                                                                                                                                                                                         | <p>radio, Required</p> <table border="1"> <tr><td>1</td><td>1 = Not at all costly</td></tr> <tr><td>2</td><td>2 = Somewhat costly</td></tr> <tr><td>3</td><td>3 = Moderately costly</td></tr> <tr><td>4</td><td>4 = Very costly</td></tr> <tr><td>5</td><td>5 = Extremely costly</td></tr> </table>                     | 1 | 1 = Not at all costly     | 2 | 2 = Somewhat costly     | 3 | 3 = Moderately costly     | 4 | 4 = Very costly     | 5 | 5 = Extremely costly     |
| 1   | 1 = Not at all costly                                                                               |                                                                                                                                                                                                                                                                                                                                                                                                                                                                                                                  |                                                                                                                                                                                                                                                                                                                         |   |                           |   |                         |   |                           |   |                     |   |                          |
| 2   | 2 = Somewhat costly                                                                                 |                                                                                                                                                                                                                                                                                                                                                                                                                                                                                                                  |                                                                                                                                                                                                                                                                                                                         |   |                           |   |                         |   |                           |   |                     |   |                          |
| 3   | 3 = Moderately costly                                                                               |                                                                                                                                                                                                                                                                                                                                                                                                                                                                                                                  |                                                                                                                                                                                                                                                                                                                         |   |                           |   |                         |   |                           |   |                     |   |                          |
| 4   | 4 = Very costly                                                                                     |                                                                                                                                                                                                                                                                                                                                                                                                                                                                                                                  |                                                                                                                                                                                                                                                                                                                         |   |                           |   |                         |   |                           |   |                     |   |                          |
| 5   | 5 = Extremely costly                                                                                |                                                                                                                                                                                                                                                                                                                                                                                                                                                                                                                  |                                                                                                                                                                                                                                                                                                                         |   |                           |   |                         |   |                           |   |                     |   |                          |
| 238 | <p>section_4_action_6_yes_no</p>                                                                    | <p>Action 6: Assess for readiness and identify barriers and facilitators</p> <p>Q: Did your institution assess various aspects of the organization to determine its degree of readiness to implement, barriers that may impede implementation, and strengths that can be used in the implementation effort of the ABCDEF bundle?</p> <p>If action not used, mark "No" and go to next reflection question</p>                                                                                                     | <p>yesno, Required</p> <table border="1"> <tr><td>1</td><td>Yes</td></tr> <tr><td>0</td><td>No</td></tr> </table> <p>Custom alignment: RH</p>                                                                                                                                                                           | 1 | Yes                       | 0 | No                      |   |                           |   |                     |   |                          |
| 1   | Yes                                                                                                 |                                                                                                                                                                                                                                                                                                                                                                                                                                                                                                                  |                                                                                                                                                                                                                                                                                                                         |   |                           |   |                         |   |                           |   |                     |   |                          |
| 0   | No                                                                                                  |                                                                                                                                                                                                                                                                                                                                                                                                                                                                                                                  |                                                                                                                                                                                                                                                                                                                         |   |                           |   |                         |   |                           |   |                     |   |                          |
| 239 | <p>section_4_action_6_text</p> <p>Show the field ONLY if:<br/>[section_4_action_6_yes_no] = '1'</p> | <p>When reflecting on your ICU's ABCDEF bundle implementation efforts:</p>                                                                                                                                                                                                                                                                                                                                                                                                                                       | <p>descriptive</p>                                                                                                                                                                                                                                                                                                      |   |                           |   |                         |   |                           |   |                     |   |                          |

|     |                                                                                                     |                                                                                                                                                                                                                                                                                                                                                        |                                                                                                                                                                                                                                                                                                                         |   |                           |   |                         |   |                           |   |                     |   |                          |
|-----|-----------------------------------------------------------------------------------------------------|--------------------------------------------------------------------------------------------------------------------------------------------------------------------------------------------------------------------------------------------------------------------------------------------------------------------------------------------------------|-------------------------------------------------------------------------------------------------------------------------------------------------------------------------------------------------------------------------------------------------------------------------------------------------------------------------|---|---------------------------|---|-------------------------|---|---------------------------|---|---------------------|---|--------------------------|
| 240 | <p>section_4_action_6_a</p> <p>Show the field ONLY if:<br/>[section_4_action_6_yes_no] = '1'</p>    | <p>A. How helpful was assessing for readiness and identifying barriers and facilitators in increasing bundle adoption?</p>                                                                                                                                                                                                                             | <p>radio, Required</p> <table border="1"> <tr><td>1</td><td>1 = Not at all helpful</td></tr> <tr><td>2</td><td>2 = Somewhat helpful</td></tr> <tr><td>3</td><td>3 = Moderately helpful</td></tr> <tr><td>4</td><td>4 = Very helpful</td></tr> <tr><td>5</td><td>5 = Extremely helpful</td></tr> </table>                | 1 | 1 = Not at all helpful    | 2 | 2 = Somewhat helpful    | 3 | 3 = Moderately helpful    | 4 | 4 = Very helpful    | 5 | 5 = Extremely helpful    |
| 1   | 1 = Not at all helpful                                                                              |                                                                                                                                                                                                                                                                                                                                                        |                                                                                                                                                                                                                                                                                                                         |   |                           |   |                         |   |                           |   |                     |   |                          |
| 2   | 2 = Somewhat helpful                                                                                |                                                                                                                                                                                                                                                                                                                                                        |                                                                                                                                                                                                                                                                                                                         |   |                           |   |                         |   |                           |   |                     |   |                          |
| 3   | 3 = Moderately helpful                                                                              |                                                                                                                                                                                                                                                                                                                                                        |                                                                                                                                                                                                                                                                                                                         |   |                           |   |                         |   |                           |   |                     |   |                          |
| 4   | 4 = Very helpful                                                                                    |                                                                                                                                                                                                                                                                                                                                                        |                                                                                                                                                                                                                                                                                                                         |   |                           |   |                         |   |                           |   |                     |   |                          |
| 5   | 5 = Extremely helpful                                                                               |                                                                                                                                                                                                                                                                                                                                                        |                                                                                                                                                                                                                                                                                                                         |   |                           |   |                         |   |                           |   |                     |   |                          |
| 241 | <p>section_4_action_6_b</p> <p>Show the field ONLY if:<br/>[section_4_action_6_yes_no] = '1'</p>    | <p>B. How acceptable was assessing for bundle readiness and identifying barriers and facilitators among ICU team members?</p>                                                                                                                                                                                                                          | <p>radio, Required</p> <table border="1"> <tr><td>1</td><td>1 = Not at all acceptable</td></tr> <tr><td>2</td><td>2 = Somewhat acceptable</td></tr> <tr><td>3</td><td>3 = Moderately acceptable</td></tr> <tr><td>4</td><td>4 = Very acceptable</td></tr> <tr><td>5</td><td>5 = Extremely acceptable</td></tr> </table> | 1 | 1 = Not at all acceptable | 2 | 2 = Somewhat acceptable | 3 | 3 = Moderately acceptable | 4 | 4 = Very acceptable | 5 | 5 = Extremely acceptable |
| 1   | 1 = Not at all acceptable                                                                           |                                                                                                                                                                                                                                                                                                                                                        |                                                                                                                                                                                                                                                                                                                         |   |                           |   |                         |   |                           |   |                     |   |                          |
| 2   | 2 = Somewhat acceptable                                                                             |                                                                                                                                                                                                                                                                                                                                                        |                                                                                                                                                                                                                                                                                                                         |   |                           |   |                         |   |                           |   |                     |   |                          |
| 3   | 3 = Moderately acceptable                                                                           |                                                                                                                                                                                                                                                                                                                                                        |                                                                                                                                                                                                                                                                                                                         |   |                           |   |                         |   |                           |   |                     |   |                          |
| 4   | 4 = Very acceptable                                                                                 |                                                                                                                                                                                                                                                                                                                                                        |                                                                                                                                                                                                                                                                                                                         |   |                           |   |                         |   |                           |   |                     |   |                          |
| 5   | 5 = Extremely acceptable                                                                            |                                                                                                                                                                                                                                                                                                                                                        |                                                                                                                                                                                                                                                                                                                         |   |                           |   |                         |   |                           |   |                     |   |                          |
| 242 | <p>section_4_action_6_c</p> <p>Show the field ONLY if:<br/>[section_4_action_6_yes_no] = '1'</p>    | <p>C. How feasible was it to assess for bundle readiness and identifying barriers and facilitators?</p>                                                                                                                                                                                                                                                | <p>radio, Required</p> <table border="1"> <tr><td>1</td><td>1 = Not at all feasible</td></tr> <tr><td>2</td><td>2 = Somewhat feasible</td></tr> <tr><td>3</td><td>3 = Moderately feasible</td></tr> <tr><td>4</td><td>4 = Very feasible</td></tr> <tr><td>5</td><td>5 = Extremely feasible</td></tr> </table>           | 1 | 1 = Not at all feasible   | 2 | 2 = Somewhat feasible   | 3 | 3 = Moderately feasible   | 4 | 4 = Very feasible   | 5 | 5 = Extremely feasible   |
| 1   | 1 = Not at all feasible                                                                             |                                                                                                                                                                                                                                                                                                                                                        |                                                                                                                                                                                                                                                                                                                         |   |                           |   |                         |   |                           |   |                     |   |                          |
| 2   | 2 = Somewhat feasible                                                                               |                                                                                                                                                                                                                                                                                                                                                        |                                                                                                                                                                                                                                                                                                                         |   |                           |   |                         |   |                           |   |                     |   |                          |
| 3   | 3 = Moderately feasible                                                                             |                                                                                                                                                                                                                                                                                                                                                        |                                                                                                                                                                                                                                                                                                                         |   |                           |   |                         |   |                           |   |                     |   |                          |
| 4   | 4 = Very feasible                                                                                   |                                                                                                                                                                                                                                                                                                                                                        |                                                                                                                                                                                                                                                                                                                         |   |                           |   |                         |   |                           |   |                     |   |                          |
| 5   | 5 = Extremely feasible                                                                              |                                                                                                                                                                                                                                                                                                                                                        |                                                                                                                                                                                                                                                                                                                         |   |                           |   |                         |   |                           |   |                     |   |                          |
| 243 | <p>section_4_action_6_d</p> <p>Show the field ONLY if:<br/>[section_4_action_6_yes_no] = '1'</p>    | <p>D. How costly (in terms of staff time, equipment, and other) was assessing for bundle readiness and identifying barriers and facilitators?</p>                                                                                                                                                                                                      | <p>radio, Required</p> <table border="1"> <tr><td>1</td><td>1 =Not at all costly</td></tr> <tr><td>2</td><td>2 = Somewhat costly</td></tr> <tr><td>3</td><td>3 = Moderately costly</td></tr> <tr><td>4</td><td>4 = Very costly</td></tr> <tr><td>5</td><td>5 = Extremely costly</td></tr> </table>                      | 1 | 1 =Not at all costly      | 2 | 2 = Somewhat costly     | 3 | 3 = Moderately costly     | 4 | 4 = Very costly     | 5 | 5 = Extremely costly     |
| 1   | 1 =Not at all costly                                                                                |                                                                                                                                                                                                                                                                                                                                                        |                                                                                                                                                                                                                                                                                                                         |   |                           |   |                         |   |                           |   |                     |   |                          |
| 2   | 2 = Somewhat costly                                                                                 |                                                                                                                                                                                                                                                                                                                                                        |                                                                                                                                                                                                                                                                                                                         |   |                           |   |                         |   |                           |   |                     |   |                          |
| 3   | 3 = Moderately costly                                                                               |                                                                                                                                                                                                                                                                                                                                                        |                                                                                                                                                                                                                                                                                                                         |   |                           |   |                         |   |                           |   |                     |   |                          |
| 4   | 4 = Very costly                                                                                     |                                                                                                                                                                                                                                                                                                                                                        |                                                                                                                                                                                                                                                                                                                         |   |                           |   |                         |   |                           |   |                     |   |                          |
| 5   | 5 = Extremely costly                                                                                |                                                                                                                                                                                                                                                                                                                                                        |                                                                                                                                                                                                                                                                                                                         |   |                           |   |                         |   |                           |   |                     |   |                          |
| 244 | <p>section_4_action_7_yes_no</p>                                                                    | <p>Action 7: Audit and provide feedback</p> <p>Q: Did your institution collect and summarize ABCDEF bundle-related clinical performance data over a specified time period and give it to clinicians and administrators to monitor, evaluate, and modify provider behavior?</p> <p>If action not used, mark "No" and go to next reflection question</p> | <p>yesno, Required</p> <table border="1"> <tr><td>1</td><td>Yes</td></tr> <tr><td>0</td><td>No</td></tr> </table> <p>Custom alignment: RH</p>                                                                                                                                                                           | 1 | Yes                       | 0 | No                      |   |                           |   |                     |   |                          |
| 1   | Yes                                                                                                 |                                                                                                                                                                                                                                                                                                                                                        |                                                                                                                                                                                                                                                                                                                         |   |                           |   |                         |   |                           |   |                     |   |                          |
| 0   | No                                                                                                  |                                                                                                                                                                                                                                                                                                                                                        |                                                                                                                                                                                                                                                                                                                         |   |                           |   |                         |   |                           |   |                     |   |                          |
| 245 | <p>section_4_action_7_text</p> <p>Show the field ONLY if:<br/>[section_4_action_7_yes_no] = '1'</p> | <p>When reflecting on your ICU's ABCDEF bundle implementation efforts:</p>                                                                                                                                                                                                                                                                             | <p>descriptive</p>                                                                                                                                                                                                                                                                                                      |   |                           |   |                         |   |                           |   |                     |   |                          |
| 246 | <p>section_4_action_7_a</p> <p>Show the field ONLY if:<br/>[section_4_action_7_yes_no] = '1'</p>    | <p>A. How helpful was auditing and feedback for increasing bundle adoption?</p>                                                                                                                                                                                                                                                                        | <p>radio, Required</p> <table border="1"> <tr><td>1</td><td>1 = Not at all helpful</td></tr> <tr><td>2</td><td>2 = Somewhat helpful</td></tr> <tr><td>3</td><td>3 = Moderately helpful</td></tr> <tr><td>4</td><td>4 = Very helpful</td></tr> <tr><td>5</td><td>5 = Extremely helpful</td></tr> </table>                | 1 | 1 = Not at all helpful    | 2 | 2 = Somewhat helpful    | 3 | 3 = Moderately helpful    | 4 | 4 = Very helpful    | 5 | 5 = Extremely helpful    |
| 1   | 1 = Not at all helpful                                                                              |                                                                                                                                                                                                                                                                                                                                                        |                                                                                                                                                                                                                                                                                                                         |   |                           |   |                         |   |                           |   |                     |   |                          |
| 2   | 2 = Somewhat helpful                                                                                |                                                                                                                                                                                                                                                                                                                                                        |                                                                                                                                                                                                                                                                                                                         |   |                           |   |                         |   |                           |   |                     |   |                          |
| 3   | 3 = Moderately helpful                                                                              |                                                                                                                                                                                                                                                                                                                                                        |                                                                                                                                                                                                                                                                                                                         |   |                           |   |                         |   |                           |   |                     |   |                          |
| 4   | 4 = Very helpful                                                                                    |                                                                                                                                                                                                                                                                                                                                                        |                                                                                                                                                                                                                                                                                                                         |   |                           |   |                         |   |                           |   |                     |   |                          |
| 5   | 5 = Extremely helpful                                                                               |                                                                                                                                                                                                                                                                                                                                                        |                                                                                                                                                                                                                                                                                                                         |   |                           |   |                         |   |                           |   |                     |   |                          |
| 247 | <p>section_4_action_7_b</p> <p>Show the field ONLY if:<br/>[section_4_action_7_yes_no] = '1'</p>    | <p>B. How acceptable was auditing and providing bundle-related feedback among ICU team members?</p>                                                                                                                                                                                                                                                    | <p>radio, Required</p> <table border="1"> <tr><td>1</td><td>1 = Not at all acceptable</td></tr> <tr><td>2</td><td>2 = Somewhat acceptable</td></tr> <tr><td>3</td><td>3 = Moderately acceptable</td></tr> <tr><td>4</td><td>4 = Very acceptable</td></tr> <tr><td>5</td><td>5 = Extremely acceptable</td></tr> </table> | 1 | 1 = Not at all acceptable | 2 | 2 = Somewhat acceptable | 3 | 3 = Moderately acceptable | 4 | 4 = Very acceptable | 5 | 5 = Extremely acceptable |
| 1   | 1 = Not at all acceptable                                                                           |                                                                                                                                                                                                                                                                                                                                                        |                                                                                                                                                                                                                                                                                                                         |   |                           |   |                         |   |                           |   |                     |   |                          |
| 2   | 2 = Somewhat acceptable                                                                             |                                                                                                                                                                                                                                                                                                                                                        |                                                                                                                                                                                                                                                                                                                         |   |                           |   |                         |   |                           |   |                     |   |                          |
| 3   | 3 = Moderately acceptable                                                                           |                                                                                                                                                                                                                                                                                                                                                        |                                                                                                                                                                                                                                                                                                                         |   |                           |   |                         |   |                           |   |                     |   |                          |
| 4   | 4 = Very acceptable                                                                                 |                                                                                                                                                                                                                                                                                                                                                        |                                                                                                                                                                                                                                                                                                                         |   |                           |   |                         |   |                           |   |                     |   |                          |
| 5   | 5 = Extremely acceptable                                                                            |                                                                                                                                                                                                                                                                                                                                                        |                                                                                                                                                                                                                                                                                                                         |   |                           |   |                         |   |                           |   |                     |   |                          |
| 248 | <p>section_4_action_7_c</p> <p>Show the field ONLY if:<br/>[section_4_action_7_yes_no] = '1'</p>    | <p>C. How feasible was it to audit and provide bundle-related feedback?</p>                                                                                                                                                                                                                                                                            | <p>radio, Required</p> <table border="1"> <tr><td>1</td><td>1 = Not at all feasible</td></tr> <tr><td>2</td><td>2 = Somewhat feasible</td></tr> <tr><td>3</td><td>3 = Moderately feasible</td></tr> <tr><td>4</td><td>4 = Very feasible</td></tr> <tr><td>5</td><td>5 = Extremely feasible</td></tr> </table>           | 1 | 1 = Not at all feasible   | 2 | 2 = Somewhat feasible   | 3 | 3 = Moderately feasible   | 4 | 4 = Very feasible   | 5 | 5 = Extremely feasible   |
| 1   | 1 = Not at all feasible                                                                             |                                                                                                                                                                                                                                                                                                                                                        |                                                                                                                                                                                                                                                                                                                         |   |                           |   |                         |   |                           |   |                     |   |                          |
| 2   | 2 = Somewhat feasible                                                                               |                                                                                                                                                                                                                                                                                                                                                        |                                                                                                                                                                                                                                                                                                                         |   |                           |   |                         |   |                           |   |                     |   |                          |
| 3   | 3 = Moderately feasible                                                                             |                                                                                                                                                                                                                                                                                                                                                        |                                                                                                                                                                                                                                                                                                                         |   |                           |   |                         |   |                           |   |                     |   |                          |
| 4   | 4 = Very feasible                                                                                   |                                                                                                                                                                                                                                                                                                                                                        |                                                                                                                                                                                                                                                                                                                         |   |                           |   |                         |   |                           |   |                     |   |                          |
| 5   | 5 = Extremely feasible                                                                              |                                                                                                                                                                                                                                                                                                                                                        |                                                                                                                                                                                                                                                                                                                         |   |                           |   |                         |   |                           |   |                     |   |                          |

|     |                                                                                         |                                                                                                                                                                                                                                                                                                                                                                          |                                                                                                                                                                   |
|-----|-----------------------------------------------------------------------------------------|--------------------------------------------------------------------------------------------------------------------------------------------------------------------------------------------------------------------------------------------------------------------------------------------------------------------------------------------------------------------------|-------------------------------------------------------------------------------------------------------------------------------------------------------------------|
| 249 | section_4_action_7_d<br>Show the field ONLY if:<br>[section_4_action_7_yes_no] = '1'    | D. How costly (in terms of staff time, equipment, and other) was auditing and providing bundle-related feedback?                                                                                                                                                                                                                                                         | radio, Required<br>1 1 = Not at all costly<br>2 2 = Somewhat costly<br>3 3 = Moderately costly<br>4 4 = Very costly<br>5 5 = Extremely costly                     |
| 250 | section_4_action_8_yes_no                                                               | Action 8: Develop and implement tools for quality monitoring<br><br>Q: Did your institution develop, test, and introduce into quality-monitoring systems the right input - the appropriate language, protocols, algorithms, standards, and measures (of processes, patient/consumer outcomes, and implementation outcomes) that are often specific to the ABCDEF bundle? | yesno, Required<br>1 Yes<br>0 No<br><br>Custom alignment: RH                                                                                                      |
| 251 | section_4_action_8_text<br>Show the field ONLY if:<br>[section_4_action_8_yes_no] = '1' | When reflecting on your ICU's ABCDEF bundle implementation efforts:                                                                                                                                                                                                                                                                                                      | descriptive                                                                                                                                                       |
| 252 | section_4_action_8_a<br>Show the field ONLY if:<br>[section_4_action_8_yes_no] = '1'    | A. How helpful was developing and implementing tools for quality monitoring for increasing bundle adoption?                                                                                                                                                                                                                                                              | radio, Required<br>1 1 = Not at all helpful<br>2 2 = Somewhat helpful<br>3 3 = Moderately helpful<br>4 4 = Very helpful<br>5 5 = Extremely helpful                |
| 253 | section_4_action_8_b<br>Show the field ONLY if:<br>[section_4_action_8_yes_no] = '1'    | B. How acceptable was developing and implementing bundle-related tools for quality monitoring among ICU team members?                                                                                                                                                                                                                                                    | radio, Required<br>1 1 = Not at all acceptable<br>2 2 = Somewhat acceptable<br>3 3 = Moderately acceptable<br>4 4 = Very acceptable<br>5 5 = Extremely acceptable |
| 254 | section_4_action_8_c<br>Show the field ONLY if:<br>[section_4_action_8_yes_no] = '1'    | C. How feasible was it to develop and implement tools for bundle-related quality monitoring?                                                                                                                                                                                                                                                                             | radio, Required<br>1 1 = Not at all feasible<br>2 2 = Somewhat feasible<br>3 3 = Moderately feasible<br>4 4 = Very feasible<br>5 5 = Extremely feasible           |
| 255 | section_4_action_8_d<br>Show the field ONLY if:<br>[section_4_action_8_yes_no] = '1'    | D. How costly (in terms of staff time, equipment, and other) was developing and implementing tools for bundle-related quality monitoring?                                                                                                                                                                                                                                | radio, Required<br>1 1 = Not at all costly<br>2 2 = Somewhat costly<br>3 3 = Moderately costly<br>4 4 = Very costly<br>5 5 = Extremely costly                     |
| 256 | section_4_action_9_yes_no                                                               | Action 9: Develop and organize quality monitoring systems<br><br>Q: Did your institution develop and organize systems and procedures that monitor clinical processes and/or outcomes for the purpose of quality assurance and improvement for the ABCDEF bundle?<br><br>If action not used, mark "No" and go to next reflection question                                 | yesno, Required<br>1 Yes<br>0 No<br><br>Custom alignment: RH                                                                                                      |
| 257 | section_4_action_9_text<br>Show the field ONLY if:<br>[section_4_action_9_yes_no] = '1' | When reflecting on your ICU's ABCDEF bundle implementation efforts:                                                                                                                                                                                                                                                                                                      | descriptive                                                                                                                                                       |

|     |                                                                                                       |                                                                                                                                                                                                                                                                                                                                                                                                                                                                                                                                                                                                           |                                                                                                                                                                                                                                                                                                                         |   |                           |   |                         |   |                           |   |                     |   |                          |
|-----|-------------------------------------------------------------------------------------------------------|-----------------------------------------------------------------------------------------------------------------------------------------------------------------------------------------------------------------------------------------------------------------------------------------------------------------------------------------------------------------------------------------------------------------------------------------------------------------------------------------------------------------------------------------------------------------------------------------------------------|-------------------------------------------------------------------------------------------------------------------------------------------------------------------------------------------------------------------------------------------------------------------------------------------------------------------------|---|---------------------------|---|-------------------------|---|---------------------------|---|---------------------|---|--------------------------|
| 258 | <p>section_4_action_9_a</p> <p>Show the field ONLY if:<br/>[section_4_action_9_yes_no] = '1'</p>      | <p>A. How helpful was developing and organizing quality monitoring systems for increasing bundle adoption?</p>                                                                                                                                                                                                                                                                                                                                                                                                                                                                                            | <p>radio, Required</p> <table border="1"> <tr><td>1</td><td>1 = Not at all helpful</td></tr> <tr><td>2</td><td>2 = Somewhat helpful</td></tr> <tr><td>3</td><td>3 = Moderately helpful</td></tr> <tr><td>4</td><td>4 = Very helpful</td></tr> <tr><td>5</td><td>5 = Extremely helpful</td></tr> </table>                | 1 | 1 = Not at all helpful    | 2 | 2 = Somewhat helpful    | 3 | 3 = Moderately helpful    | 4 | 4 = Very helpful    | 5 | 5 = Extremely helpful    |
| 1   | 1 = Not at all helpful                                                                                |                                                                                                                                                                                                                                                                                                                                                                                                                                                                                                                                                                                                           |                                                                                                                                                                                                                                                                                                                         |   |                           |   |                         |   |                           |   |                     |   |                          |
| 2   | 2 = Somewhat helpful                                                                                  |                                                                                                                                                                                                                                                                                                                                                                                                                                                                                                                                                                                                           |                                                                                                                                                                                                                                                                                                                         |   |                           |   |                         |   |                           |   |                     |   |                          |
| 3   | 3 = Moderately helpful                                                                                |                                                                                                                                                                                                                                                                                                                                                                                                                                                                                                                                                                                                           |                                                                                                                                                                                                                                                                                                                         |   |                           |   |                         |   |                           |   |                     |   |                          |
| 4   | 4 = Very helpful                                                                                      |                                                                                                                                                                                                                                                                                                                                                                                                                                                                                                                                                                                                           |                                                                                                                                                                                                                                                                                                                         |   |                           |   |                         |   |                           |   |                     |   |                          |
| 5   | 5 = Extremely helpful                                                                                 |                                                                                                                                                                                                                                                                                                                                                                                                                                                                                                                                                                                                           |                                                                                                                                                                                                                                                                                                                         |   |                           |   |                         |   |                           |   |                     |   |                          |
| 259 | <p>section_4_action_9_b</p> <p>Show the field ONLY if:<br/>[section_4_action_9_yes_no] = '1'</p>      | <p>B. How acceptable was developing and organizing bundle-related quality monitoring systems among ICU team members?</p>                                                                                                                                                                                                                                                                                                                                                                                                                                                                                  | <p>radio, Required</p> <table border="1"> <tr><td>1</td><td>1 = Not at all acceptable</td></tr> <tr><td>2</td><td>2 = Somewhat acceptable</td></tr> <tr><td>3</td><td>3 = Moderately acceptable</td></tr> <tr><td>4</td><td>4 = Very acceptable</td></tr> <tr><td>5</td><td>5 = Extremely acceptable</td></tr> </table> | 1 | 1 = Not at all acceptable | 2 | 2 = Somewhat acceptable | 3 | 3 = Moderately acceptable | 4 | 4 = Very acceptable | 5 | 5 = Extremely acceptable |
| 1   | 1 = Not at all acceptable                                                                             |                                                                                                                                                                                                                                                                                                                                                                                                                                                                                                                                                                                                           |                                                                                                                                                                                                                                                                                                                         |   |                           |   |                         |   |                           |   |                     |   |                          |
| 2   | 2 = Somewhat acceptable                                                                               |                                                                                                                                                                                                                                                                                                                                                                                                                                                                                                                                                                                                           |                                                                                                                                                                                                                                                                                                                         |   |                           |   |                         |   |                           |   |                     |   |                          |
| 3   | 3 = Moderately acceptable                                                                             |                                                                                                                                                                                                                                                                                                                                                                                                                                                                                                                                                                                                           |                                                                                                                                                                                                                                                                                                                         |   |                           |   |                         |   |                           |   |                     |   |                          |
| 4   | 4 = Very acceptable                                                                                   |                                                                                                                                                                                                                                                                                                                                                                                                                                                                                                                                                                                                           |                                                                                                                                                                                                                                                                                                                         |   |                           |   |                         |   |                           |   |                     |   |                          |
| 5   | 5 = Extremely acceptable                                                                              |                                                                                                                                                                                                                                                                                                                                                                                                                                                                                                                                                                                                           |                                                                                                                                                                                                                                                                                                                         |   |                           |   |                         |   |                           |   |                     |   |                          |
| 260 | <p>section_4_action_9_c</p> <p>Show the field ONLY if:<br/>[section_4_action_9_yes_no] = '1'</p>      | <p>C. How feasible was it to develop and organize bundle-related quality monitoring systems?</p>                                                                                                                                                                                                                                                                                                                                                                                                                                                                                                          | <p>radio, Required</p> <table border="1"> <tr><td>1</td><td>1 = Not at all feasible</td></tr> <tr><td>2</td><td>2 = Somewhat feasible</td></tr> <tr><td>3</td><td>3 = Moderately feasible</td></tr> <tr><td>4</td><td>4 = Very feasible</td></tr> <tr><td>5</td><td>5 = Extremely feasible</td></tr> </table>           | 1 | 1 = Not at all feasible   | 2 | 2 = Somewhat feasible   | 3 | 3 = Moderately feasible   | 4 | 4 = Very feasible   | 5 | 5 = Extremely feasible   |
| 1   | 1 = Not at all feasible                                                                               |                                                                                                                                                                                                                                                                                                                                                                                                                                                                                                                                                                                                           |                                                                                                                                                                                                                                                                                                                         |   |                           |   |                         |   |                           |   |                     |   |                          |
| 2   | 2 = Somewhat feasible                                                                                 |                                                                                                                                                                                                                                                                                                                                                                                                                                                                                                                                                                                                           |                                                                                                                                                                                                                                                                                                                         |   |                           |   |                         |   |                           |   |                     |   |                          |
| 3   | 3 = Moderately feasible                                                                               |                                                                                                                                                                                                                                                                                                                                                                                                                                                                                                                                                                                                           |                                                                                                                                                                                                                                                                                                                         |   |                           |   |                         |   |                           |   |                     |   |                          |
| 4   | 4 = Very feasible                                                                                     |                                                                                                                                                                                                                                                                                                                                                                                                                                                                                                                                                                                                           |                                                                                                                                                                                                                                                                                                                         |   |                           |   |                         |   |                           |   |                     |   |                          |
| 5   | 5 = Extremely feasible                                                                                |                                                                                                                                                                                                                                                                                                                                                                                                                                                                                                                                                                                                           |                                                                                                                                                                                                                                                                                                                         |   |                           |   |                         |   |                           |   |                     |   |                          |
| 261 | <p>section_4_action_9_d</p> <p>Show the field ONLY if:<br/>[section_4_action_9_yes_no] = '1'</p>      | <p>D. How costly (in terms of staff time, equipment, and other) was developing and organizing bundle-related quality monitoring systems?</p>                                                                                                                                                                                                                                                                                                                                                                                                                                                              | <p>radio, Required</p> <table border="1"> <tr><td>1</td><td>1 =Not at all costly</td></tr> <tr><td>2</td><td>2 = Somewhat costly</td></tr> <tr><td>3</td><td>3 = Moderately costly</td></tr> <tr><td>4</td><td>4 = Very costly</td></tr> <tr><td>5</td><td>5 = Extremely costly</td></tr> </table>                      | 1 | 1 =Not at all costly      | 2 | 2 = Somewhat costly     | 3 | 3 = Moderately costly     | 4 | 4 = Very costly     | 5 | 5 = Extremely costly     |
| 1   | 1 =Not at all costly                                                                                  |                                                                                                                                                                                                                                                                                                                                                                                                                                                                                                                                                                                                           |                                                                                                                                                                                                                                                                                                                         |   |                           |   |                         |   |                           |   |                     |   |                          |
| 2   | 2 = Somewhat costly                                                                                   |                                                                                                                                                                                                                                                                                                                                                                                                                                                                                                                                                                                                           |                                                                                                                                                                                                                                                                                                                         |   |                           |   |                         |   |                           |   |                     |   |                          |
| 3   | 3 = Moderately costly                                                                                 |                                                                                                                                                                                                                                                                                                                                                                                                                                                                                                                                                                                                           |                                                                                                                                                                                                                                                                                                                         |   |                           |   |                         |   |                           |   |                     |   |                          |
| 4   | 4 = Very costly                                                                                       |                                                                                                                                                                                                                                                                                                                                                                                                                                                                                                                                                                                                           |                                                                                                                                                                                                                                                                                                                         |   |                           |   |                         |   |                           |   |                     |   |                          |
| 5   | 5 = Extremely costly                                                                                  |                                                                                                                                                                                                                                                                                                                                                                                                                                                                                                                                                                                                           |                                                                                                                                                                                                                                                                                                                         |   |                           |   |                         |   |                           |   |                     |   |                          |
| 262 | <p>section_4_action_10_yes_no</p>                                                                     | <p>Action 10: Develop a formal implementation blueprint</p> <p>Q: Did your institution develop a formal implementation blueprint that includes all ABCDEF bundle goals and strategies? The blueprint should include the following: 1) aim/purpose of the implementation; 2) scope of the change (e.g., what organizational units are affected); 3) timeframe and milestones; and 4) appropriate performance/progress measures. Did your institution use and update this plan to guide bundle implementation effort over time?</p> <p>If action not used, mark "No" and go to next reflection question</p> | <p>yesno, Required</p> <table border="1"> <tr><td>1</td><td>Yes</td></tr> <tr><td>0</td><td>No</td></tr> </table> <p>Custom alignment: RH</p>                                                                                                                                                                           | 1 | Yes                       | 0 | No                      |   |                           |   |                     |   |                          |
| 1   | Yes                                                                                                   |                                                                                                                                                                                                                                                                                                                                                                                                                                                                                                                                                                                                           |                                                                                                                                                                                                                                                                                                                         |   |                           |   |                         |   |                           |   |                     |   |                          |
| 0   | No                                                                                                    |                                                                                                                                                                                                                                                                                                                                                                                                                                                                                                                                                                                                           |                                                                                                                                                                                                                                                                                                                         |   |                           |   |                         |   |                           |   |                     |   |                          |
| 263 | <p>section_4_action_10_text</p> <p>Show the field ONLY if:<br/>[section_4_action_10_yes_no] = '1'</p> | <p>When reflecting on your ICU's ABCDEF bundle implementation efforts:</p>                                                                                                                                                                                                                                                                                                                                                                                                                                                                                                                                | <p>descriptive</p>                                                                                                                                                                                                                                                                                                      |   |                           |   |                         |   |                           |   |                     |   |                          |
| 264 | <p>section_4_action_10_a</p> <p>Show the field ONLY if:<br/>[section_4_action_10_yes_no] = '1'</p>    | <p>A. How helpful was developing of a formal implementation blueprint for increasing bundle adoption?</p>                                                                                                                                                                                                                                                                                                                                                                                                                                                                                                 | <p>radio, Required</p> <table border="1"> <tr><td>1</td><td>1 = Not at all helpful</td></tr> <tr><td>2</td><td>2 = Somewhat helpful</td></tr> <tr><td>3</td><td>3 = Moderately helpful</td></tr> <tr><td>4</td><td>4 = Very helpful</td></tr> <tr><td>5</td><td>5 = Extremely helpful</td></tr> </table>                | 1 | 1 = Not at all helpful    | 2 | 2 = Somewhat helpful    | 3 | 3 = Moderately helpful    | 4 | 4 = Very helpful    | 5 | 5 = Extremely helpful    |
| 1   | 1 = Not at all helpful                                                                                |                                                                                                                                                                                                                                                                                                                                                                                                                                                                                                                                                                                                           |                                                                                                                                                                                                                                                                                                                         |   |                           |   |                         |   |                           |   |                     |   |                          |
| 2   | 2 = Somewhat helpful                                                                                  |                                                                                                                                                                                                                                                                                                                                                                                                                                                                                                                                                                                                           |                                                                                                                                                                                                                                                                                                                         |   |                           |   |                         |   |                           |   |                     |   |                          |
| 3   | 3 = Moderately helpful                                                                                |                                                                                                                                                                                                                                                                                                                                                                                                                                                                                                                                                                                                           |                                                                                                                                                                                                                                                                                                                         |   |                           |   |                         |   |                           |   |                     |   |                          |
| 4   | 4 = Very helpful                                                                                      |                                                                                                                                                                                                                                                                                                                                                                                                                                                                                                                                                                                                           |                                                                                                                                                                                                                                                                                                                         |   |                           |   |                         |   |                           |   |                     |   |                          |
| 5   | 5 = Extremely helpful                                                                                 |                                                                                                                                                                                                                                                                                                                                                                                                                                                                                                                                                                                                           |                                                                                                                                                                                                                                                                                                                         |   |                           |   |                         |   |                           |   |                     |   |                          |
| 265 | <p>section_4_action_10_b</p> <p>Show the field ONLY if:<br/>[section_4_action_10_yes_no] = '1'</p>    | <p>B. How acceptable was developing of a formal bundle implementation blueprint among ICU team members?</p>                                                                                                                                                                                                                                                                                                                                                                                                                                                                                               | <p>radio, Required</p> <table border="1"> <tr><td>1</td><td>1 = Not at all acceptable</td></tr> <tr><td>2</td><td>2 = Somewhat acceptable</td></tr> <tr><td>3</td><td>3 = Moderately acceptable</td></tr> <tr><td>4</td><td>4 = Very acceptable</td></tr> <tr><td>5</td><td>5 = Extremely acceptable</td></tr> </table> | 1 | 1 = Not at all acceptable | 2 | 2 = Somewhat acceptable | 3 | 3 = Moderately acceptable | 4 | 4 = Very acceptable | 5 | 5 = Extremely acceptable |
| 1   | 1 = Not at all acceptable                                                                             |                                                                                                                                                                                                                                                                                                                                                                                                                                                                                                                                                                                                           |                                                                                                                                                                                                                                                                                                                         |   |                           |   |                         |   |                           |   |                     |   |                          |
| 2   | 2 = Somewhat acceptable                                                                               |                                                                                                                                                                                                                                                                                                                                                                                                                                                                                                                                                                                                           |                                                                                                                                                                                                                                                                                                                         |   |                           |   |                         |   |                           |   |                     |   |                          |
| 3   | 3 = Moderately acceptable                                                                             |                                                                                                                                                                                                                                                                                                                                                                                                                                                                                                                                                                                                           |                                                                                                                                                                                                                                                                                                                         |   |                           |   |                         |   |                           |   |                     |   |                          |
| 4   | 4 = Very acceptable                                                                                   |                                                                                                                                                                                                                                                                                                                                                                                                                                                                                                                                                                                                           |                                                                                                                                                                                                                                                                                                                         |   |                           |   |                         |   |                           |   |                     |   |                          |
| 5   | 5 = Extremely acceptable                                                                              |                                                                                                                                                                                                                                                                                                                                                                                                                                                                                                                                                                                                           |                                                                                                                                                                                                                                                                                                                         |   |                           |   |                         |   |                           |   |                     |   |                          |

|     |                                                                                                     |                                                                                                                                                                                                                                                                 |                                                                                                                                                                                                                                                                                                                         |   |                           |   |                         |   |                           |   |                     |   |                          |
|-----|-----------------------------------------------------------------------------------------------------|-----------------------------------------------------------------------------------------------------------------------------------------------------------------------------------------------------------------------------------------------------------------|-------------------------------------------------------------------------------------------------------------------------------------------------------------------------------------------------------------------------------------------------------------------------------------------------------------------------|---|---------------------------|---|-------------------------|---|---------------------------|---|---------------------|---|--------------------------|
| 266 | <p>section_4_action_10_c</p> <p>Show the field ONLY if:<br/>[section_4_action_10_yes_no] = '1'</p>  | <p>C. How feasible was it to develop of a formal bundle implementation blueprint?</p>                                                                                                                                                                           | <p>radio, Required</p> <table border="1"> <tr><td>1</td><td>1 = Not at all feasible</td></tr> <tr><td>2</td><td>2 = Somewhat feasible</td></tr> <tr><td>3</td><td>3 = Moderately feasible</td></tr> <tr><td>4</td><td>4 = Very feasible</td></tr> <tr><td>5</td><td>5 = Extremely feasible</td></tr> </table>           | 1 | 1 = Not at all feasible   | 2 | 2 = Somewhat feasible   | 3 | 3 = Moderately feasible   | 4 | 4 = Very feasible   | 5 | 5 = Extremely feasible   |
| 1   | 1 = Not at all feasible                                                                             |                                                                                                                                                                                                                                                                 |                                                                                                                                                                                                                                                                                                                         |   |                           |   |                         |   |                           |   |                     |   |                          |
| 2   | 2 = Somewhat feasible                                                                               |                                                                                                                                                                                                                                                                 |                                                                                                                                                                                                                                                                                                                         |   |                           |   |                         |   |                           |   |                     |   |                          |
| 3   | 3 = Moderately feasible                                                                             |                                                                                                                                                                                                                                                                 |                                                                                                                                                                                                                                                                                                                         |   |                           |   |                         |   |                           |   |                     |   |                          |
| 4   | 4 = Very feasible                                                                                   |                                                                                                                                                                                                                                                                 |                                                                                                                                                                                                                                                                                                                         |   |                           |   |                         |   |                           |   |                     |   |                          |
| 5   | 5 = Extremely feasible                                                                              |                                                                                                                                                                                                                                                                 |                                                                                                                                                                                                                                                                                                                         |   |                           |   |                         |   |                           |   |                     |   |                          |
| 267 | <p>section_4_action_10_d</p> <p>Show the field ONLY if:<br/>[section_4_action_10_yes_no] = '1'</p>  | <p>D. How costly (in terms of staff time, equipment, and other) was developing a formal bundle implementation blueprint?</p>                                                                                                                                    | <p>radio, Required</p> <table border="1"> <tr><td>1</td><td>1 =Not at all costly</td></tr> <tr><td>2</td><td>2 = Somewhat costly</td></tr> <tr><td>3</td><td>3 = Moderately costly</td></tr> <tr><td>4</td><td>4 = Very costly</td></tr> <tr><td>5</td><td>5 = Extremely costly</td></tr> </table>                      | 1 | 1 =Not at all costly      | 2 | 2 = Somewhat costly     | 3 | 3 = Moderately costly     | 4 | 4 = Very costly     | 5 | 5 = Extremely costly     |
| 1   | 1 =Not at all costly                                                                                |                                                                                                                                                                                                                                                                 |                                                                                                                                                                                                                                                                                                                         |   |                           |   |                         |   |                           |   |                     |   |                          |
| 2   | 2 = Somewhat costly                                                                                 |                                                                                                                                                                                                                                                                 |                                                                                                                                                                                                                                                                                                                         |   |                           |   |                         |   |                           |   |                     |   |                          |
| 3   | 3 = Moderately costly                                                                               |                                                                                                                                                                                                                                                                 |                                                                                                                                                                                                                                                                                                                         |   |                           |   |                         |   |                           |   |                     |   |                          |
| 4   | 4 = Very costly                                                                                     |                                                                                                                                                                                                                                                                 |                                                                                                                                                                                                                                                                                                                         |   |                           |   |                         |   |                           |   |                     |   |                          |
| 5   | 5 = Extremely costly                                                                                |                                                                                                                                                                                                                                                                 |                                                                                                                                                                                                                                                                                                                         |   |                           |   |                         |   |                           |   |                     |   |                          |
| 268 | <p>section_5_text</p>                                                                               | <p>Section Header:<br/>SECTION 5: UTILIZE FINANCIAL STRATEGIES (9 QUESTIONS)</p>                                                                                                                                                                                | <p>descriptive</p>                                                                                                                                                                                                                                                                                                      |   |                           |   |                         |   |                           |   |                     |   |                          |
| 269 | <p>section_5_action_1_yes_no</p>                                                                    | <p>Action 1: Alter incentive/allowance structures</p> <p>Q: Did your institution work to incentivize the adoption and implementation of the ABCDEF bundle or any of its components?</p> <p>If action not used, mark "No" and go to next reflection question</p> | <p>yesno, Required</p> <table border="1"> <tr><td>1</td><td>Yes</td></tr> <tr><td>0</td><td>No</td></tr> </table> <p>Custom alignment: RH</p>                                                                                                                                                                           | 1 | Yes                       | 0 | No                      |   |                           |   |                     |   |                          |
| 1   | Yes                                                                                                 |                                                                                                                                                                                                                                                                 |                                                                                                                                                                                                                                                                                                                         |   |                           |   |                         |   |                           |   |                     |   |                          |
| 0   | No                                                                                                  |                                                                                                                                                                                                                                                                 |                                                                                                                                                                                                                                                                                                                         |   |                           |   |                         |   |                           |   |                     |   |                          |
| 270 | <p>section_5_action_1_text</p> <p>Show the field ONLY if:<br/>[section_5_action_1_yes_no] = '1'</p> | <p>When reflecting on your ICU's ABCDEF bundle implementation efforts:</p>                                                                                                                                                                                      | <p>descriptive</p>                                                                                                                                                                                                                                                                                                      |   |                           |   |                         |   |                           |   |                     |   |                          |
| 271 | <p>section_5_action_1_a</p> <p>Show the field ONLY if:<br/>[section_5_action_1_yes_no] = '1'</p>    | <p>A. How helpful was altering incentive/allowance structures for increasing bundle adoption?</p>                                                                                                                                                               | <p>radio, Required</p> <table border="1"> <tr><td>1</td><td>1 = Not at all helpful</td></tr> <tr><td>2</td><td>2 = Somewhat helpful</td></tr> <tr><td>3</td><td>3 = Moderately helpful</td></tr> <tr><td>4</td><td>4 = Very helpful</td></tr> <tr><td>5</td><td>5 = Extremely helpful</td></tr> </table>                | 1 | 1 = Not at all helpful    | 2 | 2 = Somewhat helpful    | 3 | 3 = Moderately helpful    | 4 | 4 = Very helpful    | 5 | 5 = Extremely helpful    |
| 1   | 1 = Not at all helpful                                                                              |                                                                                                                                                                                                                                                                 |                                                                                                                                                                                                                                                                                                                         |   |                           |   |                         |   |                           |   |                     |   |                          |
| 2   | 2 = Somewhat helpful                                                                                |                                                                                                                                                                                                                                                                 |                                                                                                                                                                                                                                                                                                                         |   |                           |   |                         |   |                           |   |                     |   |                          |
| 3   | 3 = Moderately helpful                                                                              |                                                                                                                                                                                                                                                                 |                                                                                                                                                                                                                                                                                                                         |   |                           |   |                         |   |                           |   |                     |   |                          |
| 4   | 4 = Very helpful                                                                                    |                                                                                                                                                                                                                                                                 |                                                                                                                                                                                                                                                                                                                         |   |                           |   |                         |   |                           |   |                     |   |                          |
| 5   | 5 = Extremely helpful                                                                               |                                                                                                                                                                                                                                                                 |                                                                                                                                                                                                                                                                                                                         |   |                           |   |                         |   |                           |   |                     |   |                          |
| 272 | <p>section_5_action_1_b</p> <p>Show the field ONLY if:<br/>[section_5_action_1_yes_no] = '1'</p>    | <p>B. How acceptable was altering bundle-related incentive/allowance structures among ICU team members?</p>                                                                                                                                                     | <p>radio, Required</p> <table border="1"> <tr><td>1</td><td>1 = Not at all acceptable</td></tr> <tr><td>2</td><td>2 = Somewhat acceptable</td></tr> <tr><td>3</td><td>3 = Moderately acceptable</td></tr> <tr><td>4</td><td>4 = Very acceptable</td></tr> <tr><td>5</td><td>5 = Extremely acceptable</td></tr> </table> | 1 | 1 = Not at all acceptable | 2 | 2 = Somewhat acceptable | 3 | 3 = Moderately acceptable | 4 | 4 = Very acceptable | 5 | 5 = Extremely acceptable |
| 1   | 1 = Not at all acceptable                                                                           |                                                                                                                                                                                                                                                                 |                                                                                                                                                                                                                                                                                                                         |   |                           |   |                         |   |                           |   |                     |   |                          |
| 2   | 2 = Somewhat acceptable                                                                             |                                                                                                                                                                                                                                                                 |                                                                                                                                                                                                                                                                                                                         |   |                           |   |                         |   |                           |   |                     |   |                          |
| 3   | 3 = Moderately acceptable                                                                           |                                                                                                                                                                                                                                                                 |                                                                                                                                                                                                                                                                                                                         |   |                           |   |                         |   |                           |   |                     |   |                          |
| 4   | 4 = Very acceptable                                                                                 |                                                                                                                                                                                                                                                                 |                                                                                                                                                                                                                                                                                                                         |   |                           |   |                         |   |                           |   |                     |   |                          |
| 5   | 5 = Extremely acceptable                                                                            |                                                                                                                                                                                                                                                                 |                                                                                                                                                                                                                                                                                                                         |   |                           |   |                         |   |                           |   |                     |   |                          |
| 273 | <p>section_5_action_1_c</p> <p>Show the field ONLY if:<br/>[section_5_action_1_yes_no] = '1'</p>    | <p>C. How feasible was it to alter bundle-related incentive/allowance structures?</p>                                                                                                                                                                           | <p>radio, Required</p> <table border="1"> <tr><td>1</td><td>1 = Not at all feasible</td></tr> <tr><td>2</td><td>2 = Somewhat feasible</td></tr> <tr><td>3</td><td>3 = Moderately feasible</td></tr> <tr><td>4</td><td>4 = Very feasible</td></tr> <tr><td>5</td><td>5 = Extremely feasible</td></tr> </table>           | 1 | 1 = Not at all feasible   | 2 | 2 = Somewhat feasible   | 3 | 3 = Moderately feasible   | 4 | 4 = Very feasible   | 5 | 5 = Extremely feasible   |
| 1   | 1 = Not at all feasible                                                                             |                                                                                                                                                                                                                                                                 |                                                                                                                                                                                                                                                                                                                         |   |                           |   |                         |   |                           |   |                     |   |                          |
| 2   | 2 = Somewhat feasible                                                                               |                                                                                                                                                                                                                                                                 |                                                                                                                                                                                                                                                                                                                         |   |                           |   |                         |   |                           |   |                     |   |                          |
| 3   | 3 = Moderately feasible                                                                             |                                                                                                                                                                                                                                                                 |                                                                                                                                                                                                                                                                                                                         |   |                           |   |                         |   |                           |   |                     |   |                          |
| 4   | 4 = Very feasible                                                                                   |                                                                                                                                                                                                                                                                 |                                                                                                                                                                                                                                                                                                                         |   |                           |   |                         |   |                           |   |                     |   |                          |
| 5   | 5 = Extremely feasible                                                                              |                                                                                                                                                                                                                                                                 |                                                                                                                                                                                                                                                                                                                         |   |                           |   |                         |   |                           |   |                     |   |                          |
| 274 | <p>section_5_action_1_d</p> <p>Show the field ONLY if:<br/>[section_5_action_1_yes_no] = '1'</p>    | <p>D. How costly (in terms of staff time, equipment, and other) was altering bundle-related incentive/allowance structures?</p>                                                                                                                                 | <p>radio, Required</p> <table border="1"> <tr><td>1</td><td>1 =Not at all costly</td></tr> <tr><td>2</td><td>2 = Somewhat costly</td></tr> <tr><td>3</td><td>3 = Moderately costly</td></tr> <tr><td>4</td><td>4 = Very costly</td></tr> <tr><td>5</td><td>5 = Extremely costly</td></tr> </table>                      | 1 | 1 =Not at all costly      | 2 | 2 = Somewhat costly     | 3 | 3 = Moderately costly     | 4 | 4 = Very costly     | 5 | 5 = Extremely costly     |
| 1   | 1 =Not at all costly                                                                                |                                                                                                                                                                                                                                                                 |                                                                                                                                                                                                                                                                                                                         |   |                           |   |                         |   |                           |   |                     |   |                          |
| 2   | 2 = Somewhat costly                                                                                 |                                                                                                                                                                                                                                                                 |                                                                                                                                                                                                                                                                                                                         |   |                           |   |                         |   |                           |   |                     |   |                          |
| 3   | 3 = Moderately costly                                                                               |                                                                                                                                                                                                                                                                 |                                                                                                                                                                                                                                                                                                                         |   |                           |   |                         |   |                           |   |                     |   |                          |
| 4   | 4 = Very costly                                                                                     |                                                                                                                                                                                                                                                                 |                                                                                                                                                                                                                                                                                                                         |   |                           |   |                         |   |                           |   |                     |   |                          |
| 5   | 5 = Extremely costly                                                                                |                                                                                                                                                                                                                                                                 |                                                                                                                                                                                                                                                                                                                         |   |                           |   |                         |   |                           |   |                     |   |                          |
| 275 | <p>section_5_action_2_yes_no</p>                                                                    | <p>Action 2: Access new funding</p> <p>Q: Did your institution access new or existing money to facilitate ABCDEF bundle implementation?</p> <p>If action not used, mark "No" and go to next reflection question</p>                                             | <p>yesno, Required</p> <table border="1"> <tr><td>1</td><td>Yes</td></tr> <tr><td>0</td><td>No</td></tr> </table> <p>Custom alignment: RH</p>                                                                                                                                                                           | 1 | Yes                       | 0 | No                      |   |                           |   |                     |   |                          |
| 1   | Yes                                                                                                 |                                                                                                                                                                                                                                                                 |                                                                                                                                                                                                                                                                                                                         |   |                           |   |                         |   |                           |   |                     |   |                          |
| 0   | No                                                                                                  |                                                                                                                                                                                                                                                                 |                                                                                                                                                                                                                                                                                                                         |   |                           |   |                         |   |                           |   |                     |   |                          |



|     |                                                                                         |                                                                                                                                                                                                                                                                                         |                                                                                                                                                                                                                                                                                                                     |   |                           |   |                         |   |                           |   |                     |   |                          |
|-----|-----------------------------------------------------------------------------------------|-----------------------------------------------------------------------------------------------------------------------------------------------------------------------------------------------------------------------------------------------------------------------------------------|---------------------------------------------------------------------------------------------------------------------------------------------------------------------------------------------------------------------------------------------------------------------------------------------------------------------|---|---------------------------|---|-------------------------|---|---------------------------|---|---------------------|---|--------------------------|
| 276 | section_5_action_2_text<br>Show the field ONLY if:<br>[section_5_action_2_yes_no] = '1' | When reflecting on your ICU's ABCDEF bundle implementation efforts:                                                                                                                                                                                                                     | descriptive                                                                                                                                                                                                                                                                                                         |   |                           |   |                         |   |                           |   |                     |   |                          |
| 277 | section_5_action_2_a<br>Show the field ONLY if:<br>[section_5_action_2_yes_no] = '1'    | A. How helpful was accessing new funding for increasing bundle adoption?                                                                                                                                                                                                                | radio, Required<br><table border="1"> <tr><td>1</td><td>1 = Not at all helpful</td></tr> <tr><td>2</td><td>2 = Somewhat helpful</td></tr> <tr><td>3</td><td>3 = Moderately helpful</td></tr> <tr><td>4</td><td>4 = Very helpful</td></tr> <tr><td>5</td><td>5 = Extremely helpful</td></tr> </table>                | 1 | 1 = Not at all helpful    | 2 | 2 = Somewhat helpful    | 3 | 3 = Moderately helpful    | 4 | 4 = Very helpful    | 5 | 5 = Extremely helpful    |
| 1   | 1 = Not at all helpful                                                                  |                                                                                                                                                                                                                                                                                         |                                                                                                                                                                                                                                                                                                                     |   |                           |   |                         |   |                           |   |                     |   |                          |
| 2   | 2 = Somewhat helpful                                                                    |                                                                                                                                                                                                                                                                                         |                                                                                                                                                                                                                                                                                                                     |   |                           |   |                         |   |                           |   |                     |   |                          |
| 3   | 3 = Moderately helpful                                                                  |                                                                                                                                                                                                                                                                                         |                                                                                                                                                                                                                                                                                                                     |   |                           |   |                         |   |                           |   |                     |   |                          |
| 4   | 4 = Very helpful                                                                        |                                                                                                                                                                                                                                                                                         |                                                                                                                                                                                                                                                                                                                     |   |                           |   |                         |   |                           |   |                     |   |                          |
| 5   | 5 = Extremely helpful                                                                   |                                                                                                                                                                                                                                                                                         |                                                                                                                                                                                                                                                                                                                     |   |                           |   |                         |   |                           |   |                     |   |                          |
| 278 | section_5_action_2_b<br>Show the field ONLY if:<br>[section_5_action_2_yes_no] = '1'    | B. How acceptable was accessing new funding for bundle implementation among ICU team members?                                                                                                                                                                                           | radio, Required<br><table border="1"> <tr><td>1</td><td>1 = Not at all acceptable</td></tr> <tr><td>2</td><td>2 = Somewhat acceptable</td></tr> <tr><td>3</td><td>3 = Moderately acceptable</td></tr> <tr><td>4</td><td>4 = Very acceptable</td></tr> <tr><td>5</td><td>5 = Extremely acceptable</td></tr> </table> | 1 | 1 = Not at all acceptable | 2 | 2 = Somewhat acceptable | 3 | 3 = Moderately acceptable | 4 | 4 = Very acceptable | 5 | 5 = Extremely acceptable |
| 1   | 1 = Not at all acceptable                                                               |                                                                                                                                                                                                                                                                                         |                                                                                                                                                                                                                                                                                                                     |   |                           |   |                         |   |                           |   |                     |   |                          |
| 2   | 2 = Somewhat acceptable                                                                 |                                                                                                                                                                                                                                                                                         |                                                                                                                                                                                                                                                                                                                     |   |                           |   |                         |   |                           |   |                     |   |                          |
| 3   | 3 = Moderately acceptable                                                               |                                                                                                                                                                                                                                                                                         |                                                                                                                                                                                                                                                                                                                     |   |                           |   |                         |   |                           |   |                     |   |                          |
| 4   | 4 = Very acceptable                                                                     |                                                                                                                                                                                                                                                                                         |                                                                                                                                                                                                                                                                                                                     |   |                           |   |                         |   |                           |   |                     |   |                          |
| 5   | 5 = Extremely acceptable                                                                |                                                                                                                                                                                                                                                                                         |                                                                                                                                                                                                                                                                                                                     |   |                           |   |                         |   |                           |   |                     |   |                          |
| 279 | section_5_action_2_c<br>Show the field ONLY if:<br>[section_5_action_2_yes_no] = '1'    | C. How feasible was it to access new funding for bundle implementation?                                                                                                                                                                                                                 | radio, Required<br><table border="1"> <tr><td>1</td><td>1 = Not at all feasible</td></tr> <tr><td>2</td><td>2 = Somewhat feasible</td></tr> <tr><td>3</td><td>3 = Moderately feasible</td></tr> <tr><td>4</td><td>4 = Very feasible</td></tr> <tr><td>5</td><td>5 = Extremely feasible</td></tr> </table>           | 1 | 1 = Not at all feasible   | 2 | 2 = Somewhat feasible   | 3 | 3 = Moderately feasible   | 4 | 4 = Very feasible   | 5 | 5 = Extremely feasible   |
| 1   | 1 = Not at all feasible                                                                 |                                                                                                                                                                                                                                                                                         |                                                                                                                                                                                                                                                                                                                     |   |                           |   |                         |   |                           |   |                     |   |                          |
| 2   | 2 = Somewhat feasible                                                                   |                                                                                                                                                                                                                                                                                         |                                                                                                                                                                                                                                                                                                                     |   |                           |   |                         |   |                           |   |                     |   |                          |
| 3   | 3 = Moderately feasible                                                                 |                                                                                                                                                                                                                                                                                         |                                                                                                                                                                                                                                                                                                                     |   |                           |   |                         |   |                           |   |                     |   |                          |
| 4   | 4 = Very feasible                                                                       |                                                                                                                                                                                                                                                                                         |                                                                                                                                                                                                                                                                                                                     |   |                           |   |                         |   |                           |   |                     |   |                          |
| 5   | 5 = Extremely feasible                                                                  |                                                                                                                                                                                                                                                                                         |                                                                                                                                                                                                                                                                                                                     |   |                           |   |                         |   |                           |   |                     |   |                          |
| 280 | section_5_action_2_d<br>Show the field ONLY if:<br>[section_5_action_2_yes_no] = '1'    | D. How costly (in terms of staff time, equipment, and other) was accessing new funding for bundle implementation?                                                                                                                                                                       | radio, Required<br><table border="1"> <tr><td>1</td><td>1 =Not at all costly</td></tr> <tr><td>2</td><td>2 = Somewhat costly</td></tr> <tr><td>3</td><td>3 = Moderately costly</td></tr> <tr><td>4</td><td>4 = Very costly</td></tr> <tr><td>5</td><td>5 = Extremely costly</td></tr> </table>                      | 1 | 1 =Not at all costly      | 2 | 2 = Somewhat costly     | 3 | 3 = Moderately costly     | 4 | 4 = Very costly     | 5 | 5 = Extremely costly     |
| 1   | 1 =Not at all costly                                                                    |                                                                                                                                                                                                                                                                                         |                                                                                                                                                                                                                                                                                                                     |   |                           |   |                         |   |                           |   |                     |   |                          |
| 2   | 2 = Somewhat costly                                                                     |                                                                                                                                                                                                                                                                                         |                                                                                                                                                                                                                                                                                                                     |   |                           |   |                         |   |                           |   |                     |   |                          |
| 3   | 3 = Moderately costly                                                                   |                                                                                                                                                                                                                                                                                         |                                                                                                                                                                                                                                                                                                                     |   |                           |   |                         |   |                           |   |                     |   |                          |
| 4   | 4 = Very costly                                                                         |                                                                                                                                                                                                                                                                                         |                                                                                                                                                                                                                                                                                                                     |   |                           |   |                         |   |                           |   |                     |   |                          |
| 5   | 5 = Extremely costly                                                                    |                                                                                                                                                                                                                                                                                         |                                                                                                                                                                                                                                                                                                                     |   |                           |   |                         |   |                           |   |                     |   |                          |
| 281 | section_5_action_3_yes_no                                                               | Action 3: Alter patient/consumer fees<br>Q: Did your institution create fee structures where patients/consumers pay less for the preferred treatment (ABCDEF bundle) and more when the bundle was not utilized?<br><br>If action not used, mark "No" and go to next reflection question | yesno, Required<br><table border="1"> <tr><td>1</td><td>Yes</td></tr> <tr><td>0</td><td>No</td></tr> </table><br>Custom alignment: RH                                                                                                                                                                               | 1 | Yes                       | 0 | No                      |   |                           |   |                     |   |                          |
| 1   | Yes                                                                                     |                                                                                                                                                                                                                                                                                         |                                                                                                                                                                                                                                                                                                                     |   |                           |   |                         |   |                           |   |                     |   |                          |
| 0   | No                                                                                      |                                                                                                                                                                                                                                                                                         |                                                                                                                                                                                                                                                                                                                     |   |                           |   |                         |   |                           |   |                     |   |                          |
| 282 | section_5_action_3_text<br>Show the field ONLY if:<br>[section_5_action_3_yes_no] = '1' | When reflecting on your ICU's ABCDEF bundle implementation efforts:                                                                                                                                                                                                                     | descriptive                                                                                                                                                                                                                                                                                                         |   |                           |   |                         |   |                           |   |                     |   |                          |
| 283 | section_5_action_3_a<br>Show the field ONLY if:<br>[section_5_action_3_yes_no] = '1'    | A. How helpful was altering patient/consumer fees for increasing bundle adoption?                                                                                                                                                                                                       | radio, Required<br><table border="1"> <tr><td>1</td><td>1 = Not at all helpful</td></tr> <tr><td>2</td><td>2 = Somewhat helpful</td></tr> <tr><td>3</td><td>3 = Moderately helpful</td></tr> <tr><td>4</td><td>4 = Very helpful</td></tr> <tr><td>5</td><td>5 = Extremely helpful</td></tr> </table>                | 1 | 1 = Not at all helpful    | 2 | 2 = Somewhat helpful    | 3 | 3 = Moderately helpful    | 4 | 4 = Very helpful    | 5 | 5 = Extremely helpful    |
| 1   | 1 = Not at all helpful                                                                  |                                                                                                                                                                                                                                                                                         |                                                                                                                                                                                                                                                                                                                     |   |                           |   |                         |   |                           |   |                     |   |                          |
| 2   | 2 = Somewhat helpful                                                                    |                                                                                                                                                                                                                                                                                         |                                                                                                                                                                                                                                                                                                                     |   |                           |   |                         |   |                           |   |                     |   |                          |
| 3   | 3 = Moderately helpful                                                                  |                                                                                                                                                                                                                                                                                         |                                                                                                                                                                                                                                                                                                                     |   |                           |   |                         |   |                           |   |                     |   |                          |
| 4   | 4 = Very helpful                                                                        |                                                                                                                                                                                                                                                                                         |                                                                                                                                                                                                                                                                                                                     |   |                           |   |                         |   |                           |   |                     |   |                          |
| 5   | 5 = Extremely helpful                                                                   |                                                                                                                                                                                                                                                                                         |                                                                                                                                                                                                                                                                                                                     |   |                           |   |                         |   |                           |   |                     |   |                          |
| 284 | section_5_action_3_b<br>Show the field ONLY if:<br>[section_5_action_3_yes_no] = '1'    | B. How acceptable was altering bundle-related patient/consumer fees among ICU team members?                                                                                                                                                                                             | radio, Required<br><table border="1"> <tr><td>1</td><td>1 = Not at all acceptable</td></tr> <tr><td>2</td><td>2 = Somewhat acceptable</td></tr> <tr><td>3</td><td>3 = Moderately acceptable</td></tr> <tr><td>4</td><td>4 = Very acceptable</td></tr> <tr><td>5</td><td>5 = Extremely acceptable</td></tr> </table> | 1 | 1 = Not at all acceptable | 2 | 2 = Somewhat acceptable | 3 | 3 = Moderately acceptable | 4 | 4 = Very acceptable | 5 | 5 = Extremely acceptable |
| 1   | 1 = Not at all acceptable                                                               |                                                                                                                                                                                                                                                                                         |                                                                                                                                                                                                                                                                                                                     |   |                           |   |                         |   |                           |   |                     |   |                          |
| 2   | 2 = Somewhat acceptable                                                                 |                                                                                                                                                                                                                                                                                         |                                                                                                                                                                                                                                                                                                                     |   |                           |   |                         |   |                           |   |                     |   |                          |
| 3   | 3 = Moderately acceptable                                                               |                                                                                                                                                                                                                                                                                         |                                                                                                                                                                                                                                                                                                                     |   |                           |   |                         |   |                           |   |                     |   |                          |
| 4   | 4 = Very acceptable                                                                     |                                                                                                                                                                                                                                                                                         |                                                                                                                                                                                                                                                                                                                     |   |                           |   |                         |   |                           |   |                     |   |                          |
| 5   | 5 = Extremely acceptable                                                                |                                                                                                                                                                                                                                                                                         |                                                                                                                                                                                                                                                                                                                     |   |                           |   |                         |   |                           |   |                     |   |                          |

|     |                                                                                                     |                                                                                                                                                                                                                                                                                                |                                                                                                                                                                                                                                                                                                                         |   |                           |   |                         |   |                           |   |                     |   |                          |
|-----|-----------------------------------------------------------------------------------------------------|------------------------------------------------------------------------------------------------------------------------------------------------------------------------------------------------------------------------------------------------------------------------------------------------|-------------------------------------------------------------------------------------------------------------------------------------------------------------------------------------------------------------------------------------------------------------------------------------------------------------------------|---|---------------------------|---|-------------------------|---|---------------------------|---|---------------------|---|--------------------------|
| 285 | <p>section_5_action_3_c</p> <p>Show the field ONLY if:<br/>[section_5_action_3_yes_no] = '1'</p>    | <p>C. How feasible was it to alter patient/consumer bundle-related fees?</p>                                                                                                                                                                                                                   | <p>radio, Required</p> <table border="1"> <tr><td>1</td><td>1 = Not at all feasible</td></tr> <tr><td>2</td><td>2 = Somewhat feasible</td></tr> <tr><td>3</td><td>3 = Moderately feasible</td></tr> <tr><td>4</td><td>4 = Very feasible</td></tr> <tr><td>5</td><td>5 = Extremely feasible</td></tr> </table>           | 1 | 1 = Not at all feasible   | 2 | 2 = Somewhat feasible   | 3 | 3 = Moderately feasible   | 4 | 4 = Very feasible   | 5 | 5 = Extremely feasible   |
| 1   | 1 = Not at all feasible                                                                             |                                                                                                                                                                                                                                                                                                |                                                                                                                                                                                                                                                                                                                         |   |                           |   |                         |   |                           |   |                     |   |                          |
| 2   | 2 = Somewhat feasible                                                                               |                                                                                                                                                                                                                                                                                                |                                                                                                                                                                                                                                                                                                                         |   |                           |   |                         |   |                           |   |                     |   |                          |
| 3   | 3 = Moderately feasible                                                                             |                                                                                                                                                                                                                                                                                                |                                                                                                                                                                                                                                                                                                                         |   |                           |   |                         |   |                           |   |                     |   |                          |
| 4   | 4 = Very feasible                                                                                   |                                                                                                                                                                                                                                                                                                |                                                                                                                                                                                                                                                                                                                         |   |                           |   |                         |   |                           |   |                     |   |                          |
| 5   | 5 = Extremely feasible                                                                              |                                                                                                                                                                                                                                                                                                |                                                                                                                                                                                                                                                                                                                         |   |                           |   |                         |   |                           |   |                     |   |                          |
| 286 | <p>section_5_action_3_d</p> <p>Show the field ONLY if:<br/>[section_5_action_3_yes_no] = '1'</p>    | <p>D. How costly (in terms of staff time, equipment, and other) was altering bundle-related patient/consumer fees?</p>                                                                                                                                                                         | <p>radio, Required</p> <table border="1"> <tr><td>1</td><td>1 =Not at all costly</td></tr> <tr><td>2</td><td>2 = Somewhat costly</td></tr> <tr><td>3</td><td>3 = Moderately costly</td></tr> <tr><td>4</td><td>4 = Very costly</td></tr> <tr><td>5</td><td>5 = Extremely costly</td></tr> </table>                      | 1 | 1 =Not at all costly      | 2 | 2 = Somewhat costly     | 3 | 3 = Moderately costly     | 4 | 4 = Very costly     | 5 | 5 = Extremely costly     |
| 1   | 1 =Not at all costly                                                                                |                                                                                                                                                                                                                                                                                                |                                                                                                                                                                                                                                                                                                                         |   |                           |   |                         |   |                           |   |                     |   |                          |
| 2   | 2 = Somewhat costly                                                                                 |                                                                                                                                                                                                                                                                                                |                                                                                                                                                                                                                                                                                                                         |   |                           |   |                         |   |                           |   |                     |   |                          |
| 3   | 3 = Moderately costly                                                                               |                                                                                                                                                                                                                                                                                                |                                                                                                                                                                                                                                                                                                                         |   |                           |   |                         |   |                           |   |                     |   |                          |
| 4   | 4 = Very costly                                                                                     |                                                                                                                                                                                                                                                                                                |                                                                                                                                                                                                                                                                                                                         |   |                           |   |                         |   |                           |   |                     |   |                          |
| 5   | 5 = Extremely costly                                                                                |                                                                                                                                                                                                                                                                                                |                                                                                                                                                                                                                                                                                                                         |   |                           |   |                         |   |                           |   |                     |   |                          |
| 287 | <p>section_5_action_4_yes_no</p>                                                                    | <p>Action 4: Make billing easier</p> <p>Q: Did your institution make it easier to bill for the ABCDEF bundle or one of its components?</p> <p>If action not used, mark "No" and go to next reflection question</p>                                                                             | <p>yesno, Required</p> <table border="1"> <tr><td>1</td><td>Yes</td></tr> <tr><td>0</td><td>No</td></tr> </table> <p>Custom alignment: RH</p>                                                                                                                                                                           | 1 | Yes                       | 0 | No                      |   |                           |   |                     |   |                          |
| 1   | Yes                                                                                                 |                                                                                                                                                                                                                                                                                                |                                                                                                                                                                                                                                                                                                                         |   |                           |   |                         |   |                           |   |                     |   |                          |
| 0   | No                                                                                                  |                                                                                                                                                                                                                                                                                                |                                                                                                                                                                                                                                                                                                                         |   |                           |   |                         |   |                           |   |                     |   |                          |
| 288 | <p>section_5_action_4_text</p> <p>Show the field ONLY if:<br/>[section_5_action_4_yes_no] = '1'</p> | <p>When reflecting on your ICU's ABCDEF bundle implementation efforts:</p>                                                                                                                                                                                                                     | <p>descriptive</p>                                                                                                                                                                                                                                                                                                      |   |                           |   |                         |   |                           |   |                     |   |                          |
| 289 | <p>section_5_action_4_a</p> <p>Show the field ONLY if:<br/>[section_5_action_4_yes_no] = '1'</p>    | <p>A. How helpful was making billing easier for increasing bundle adoption?</p>                                                                                                                                                                                                                | <p>radio, Required</p> <table border="1"> <tr><td>1</td><td>1 = Not at all helpful</td></tr> <tr><td>2</td><td>2 = Somewhat helpful</td></tr> <tr><td>3</td><td>3 = Moderately helpful</td></tr> <tr><td>4</td><td>4 = Very helpful</td></tr> <tr><td>5</td><td>5 = Extremely helpful</td></tr> </table>                | 1 | 1 = Not at all helpful    | 2 | 2 = Somewhat helpful    | 3 | 3 = Moderately helpful    | 4 | 4 = Very helpful    | 5 | 5 = Extremely helpful    |
| 1   | 1 = Not at all helpful                                                                              |                                                                                                                                                                                                                                                                                                |                                                                                                                                                                                                                                                                                                                         |   |                           |   |                         |   |                           |   |                     |   |                          |
| 2   | 2 = Somewhat helpful                                                                                |                                                                                                                                                                                                                                                                                                |                                                                                                                                                                                                                                                                                                                         |   |                           |   |                         |   |                           |   |                     |   |                          |
| 3   | 3 = Moderately helpful                                                                              |                                                                                                                                                                                                                                                                                                |                                                                                                                                                                                                                                                                                                                         |   |                           |   |                         |   |                           |   |                     |   |                          |
| 4   | 4 = Very helpful                                                                                    |                                                                                                                                                                                                                                                                                                |                                                                                                                                                                                                                                                                                                                         |   |                           |   |                         |   |                           |   |                     |   |                          |
| 5   | 5 = Extremely helpful                                                                               |                                                                                                                                                                                                                                                                                                |                                                                                                                                                                                                                                                                                                                         |   |                           |   |                         |   |                           |   |                     |   |                          |
| 290 | <p>section_5_action_4_b</p> <p>Show the field ONLY if:<br/>[section_5_action_4_yes_no] = '1'</p>    | <p>B. How acceptable was making bundle-related billing easier among ICU team members?</p>                                                                                                                                                                                                      | <p>radio, Required</p> <table border="1"> <tr><td>1</td><td>1 = Not at all acceptable</td></tr> <tr><td>2</td><td>2 = Somewhat acceptable</td></tr> <tr><td>3</td><td>3 = Moderately acceptable</td></tr> <tr><td>4</td><td>4 = Very acceptable</td></tr> <tr><td>5</td><td>5 = Extremely acceptable</td></tr> </table> | 1 | 1 = Not at all acceptable | 2 | 2 = Somewhat acceptable | 3 | 3 = Moderately acceptable | 4 | 4 = Very acceptable | 5 | 5 = Extremely acceptable |
| 1   | 1 = Not at all acceptable                                                                           |                                                                                                                                                                                                                                                                                                |                                                                                                                                                                                                                                                                                                                         |   |                           |   |                         |   |                           |   |                     |   |                          |
| 2   | 2 = Somewhat acceptable                                                                             |                                                                                                                                                                                                                                                                                                |                                                                                                                                                                                                                                                                                                                         |   |                           |   |                         |   |                           |   |                     |   |                          |
| 3   | 3 = Moderately acceptable                                                                           |                                                                                                                                                                                                                                                                                                |                                                                                                                                                                                                                                                                                                                         |   |                           |   |                         |   |                           |   |                     |   |                          |
| 4   | 4 = Very acceptable                                                                                 |                                                                                                                                                                                                                                                                                                |                                                                                                                                                                                                                                                                                                                         |   |                           |   |                         |   |                           |   |                     |   |                          |
| 5   | 5 = Extremely acceptable                                                                            |                                                                                                                                                                                                                                                                                                |                                                                                                                                                                                                                                                                                                                         |   |                           |   |                         |   |                           |   |                     |   |                          |
| 291 | <p>section_5_action_4_c</p> <p>Show the field ONLY if:<br/>[section_5_action_4_yes_no] = '1'</p>    | <p>C. How feasible was it to make bundle-related billing easier?</p>                                                                                                                                                                                                                           | <p>radio, Required</p> <table border="1"> <tr><td>1</td><td>1 = Not at all feasible</td></tr> <tr><td>2</td><td>2 = Somewhat feasible</td></tr> <tr><td>3</td><td>3 = Moderately feasible</td></tr> <tr><td>4</td><td>4 = Very feasible</td></tr> <tr><td>5</td><td>5 = Extremely feasible</td></tr> </table>           | 1 | 1 = Not at all feasible   | 2 | 2 = Somewhat feasible   | 3 | 3 = Moderately feasible   | 4 | 4 = Very feasible   | 5 | 5 = Extremely feasible   |
| 1   | 1 = Not at all feasible                                                                             |                                                                                                                                                                                                                                                                                                |                                                                                                                                                                                                                                                                                                                         |   |                           |   |                         |   |                           |   |                     |   |                          |
| 2   | 2 = Somewhat feasible                                                                               |                                                                                                                                                                                                                                                                                                |                                                                                                                                                                                                                                                                                                                         |   |                           |   |                         |   |                           |   |                     |   |                          |
| 3   | 3 = Moderately feasible                                                                             |                                                                                                                                                                                                                                                                                                |                                                                                                                                                                                                                                                                                                                         |   |                           |   |                         |   |                           |   |                     |   |                          |
| 4   | 4 = Very feasible                                                                                   |                                                                                                                                                                                                                                                                                                |                                                                                                                                                                                                                                                                                                                         |   |                           |   |                         |   |                           |   |                     |   |                          |
| 5   | 5 = Extremely feasible                                                                              |                                                                                                                                                                                                                                                                                                |                                                                                                                                                                                                                                                                                                                         |   |                           |   |                         |   |                           |   |                     |   |                          |
| 292 | <p>section_5_action_4_d</p> <p>Show the field ONLY if:<br/>[section_5_action_4_yes_no] = '1'</p>    | <p>D. How costly (in terms of staff time, equipment, and other) was making bundle-related billing easier?</p>                                                                                                                                                                                  | <p>radio, Required</p> <table border="1"> <tr><td>1</td><td>1 =Not at all costly</td></tr> <tr><td>2</td><td>2 = Somewhat costly</td></tr> <tr><td>3</td><td>3 = Moderately costly</td></tr> <tr><td>4</td><td>4 = Very costly</td></tr> <tr><td>5</td><td>5 = Extremely costly</td></tr> </table>                      | 1 | 1 =Not at all costly      | 2 | 2 = Somewhat costly     | 3 | 3 = Moderately costly     | 4 | 4 = Very costly     | 5 | 5 = Extremely costly     |
| 1   | 1 =Not at all costly                                                                                |                                                                                                                                                                                                                                                                                                |                                                                                                                                                                                                                                                                                                                         |   |                           |   |                         |   |                           |   |                     |   |                          |
| 2   | 2 = Somewhat costly                                                                                 |                                                                                                                                                                                                                                                                                                |                                                                                                                                                                                                                                                                                                                         |   |                           |   |                         |   |                           |   |                     |   |                          |
| 3   | 3 = Moderately costly                                                                               |                                                                                                                                                                                                                                                                                                |                                                                                                                                                                                                                                                                                                                         |   |                           |   |                         |   |                           |   |                     |   |                          |
| 4   | 4 = Very costly                                                                                     |                                                                                                                                                                                                                                                                                                |                                                                                                                                                                                                                                                                                                                         |   |                           |   |                         |   |                           |   |                     |   |                          |
| 5   | 5 = Extremely costly                                                                                |                                                                                                                                                                                                                                                                                                |                                                                                                                                                                                                                                                                                                                         |   |                           |   |                         |   |                           |   |                     |   |                          |
| 293 | <p>section_5_action_5_yes_no</p>                                                                    | <p>Action 5: Use capitated payments</p> <p>Q: Did your institution pay providers or care systems (ICU teams) a set amount of money per patient/consumer for delivering the ABCDEF bundle or any of its components?</p> <p>If action not used, mark "No" and go to next reflection question</p> | <p>yesno, Required</p> <table border="1"> <tr><td>1</td><td>Yes</td></tr> <tr><td>0</td><td>No</td></tr> </table> <p>Custom alignment: RH</p>                                                                                                                                                                           | 1 | Yes                       | 0 | No                      |   |                           |   |                     |   |                          |
| 1   | Yes                                                                                                 |                                                                                                                                                                                                                                                                                                |                                                                                                                                                                                                                                                                                                                         |   |                           |   |                         |   |                           |   |                     |   |                          |
| 0   | No                                                                                                  |                                                                                                                                                                                                                                                                                                |                                                                                                                                                                                                                                                                                                                         |   |                           |   |                         |   |                           |   |                     |   |                          |
| 294 | <p>section_5_action_5_text</p> <p>Show the field ONLY if:<br/>[section_5_action_5_yes_no] = '1'</p> | <p>When reflecting on your ICU's ABCDEF bundle implementation efforts:</p>                                                                                                                                                                                                                     | <p>descriptive</p>                                                                                                                                                                                                                                                                                                      |   |                           |   |                         |   |                           |   |                     |   |                          |

|     |                                                                                                     |                                                                                                                                                                                                                   |                                                                                                                                                                                                                                                                                                                         |   |                           |   |                         |   |                           |   |                     |   |                          |
|-----|-----------------------------------------------------------------------------------------------------|-------------------------------------------------------------------------------------------------------------------------------------------------------------------------------------------------------------------|-------------------------------------------------------------------------------------------------------------------------------------------------------------------------------------------------------------------------------------------------------------------------------------------------------------------------|---|---------------------------|---|-------------------------|---|---------------------------|---|---------------------|---|--------------------------|
| 295 | <p>section_5_action_5_a</p> <p>Show the field ONLY if:<br/>[section_5_action_5_yes_no] = '1'</p>    | A. How helpful was using capitated payments for increasing bundle adoption?                                                                                                                                       | <p>radio, Required</p> <table border="1"> <tr><td>1</td><td>1 = Not at all helpful</td></tr> <tr><td>2</td><td>2 = Somewhat helpful</td></tr> <tr><td>3</td><td>3 = Moderately helpful</td></tr> <tr><td>4</td><td>4 = Very helpful</td></tr> <tr><td>5</td><td>5 = Extremely helpful</td></tr> </table>                | 1 | 1 = Not at all helpful    | 2 | 2 = Somewhat helpful    | 3 | 3 = Moderately helpful    | 4 | 4 = Very helpful    | 5 | 5 = Extremely helpful    |
| 1   | 1 = Not at all helpful                                                                              |                                                                                                                                                                                                                   |                                                                                                                                                                                                                                                                                                                         |   |                           |   |                         |   |                           |   |                     |   |                          |
| 2   | 2 = Somewhat helpful                                                                                |                                                                                                                                                                                                                   |                                                                                                                                                                                                                                                                                                                         |   |                           |   |                         |   |                           |   |                     |   |                          |
| 3   | 3 = Moderately helpful                                                                              |                                                                                                                                                                                                                   |                                                                                                                                                                                                                                                                                                                         |   |                           |   |                         |   |                           |   |                     |   |                          |
| 4   | 4 = Very helpful                                                                                    |                                                                                                                                                                                                                   |                                                                                                                                                                                                                                                                                                                         |   |                           |   |                         |   |                           |   |                     |   |                          |
| 5   | 5 = Extremely helpful                                                                               |                                                                                                                                                                                                                   |                                                                                                                                                                                                                                                                                                                         |   |                           |   |                         |   |                           |   |                     |   |                          |
| 296 | <p>section_5_action_5_b</p> <p>Show the field ONLY if:<br/>[section_5_action_5_yes_no] = '1'</p>    | B. How acceptable was using bundle-related capitated payments among ICU team members?                                                                                                                             | <p>radio, Required</p> <table border="1"> <tr><td>1</td><td>1 = Not at all acceptable</td></tr> <tr><td>2</td><td>2 = Somewhat acceptable</td></tr> <tr><td>3</td><td>3 = Moderately acceptable</td></tr> <tr><td>4</td><td>4 = Very acceptable</td></tr> <tr><td>5</td><td>5 = Extremely acceptable</td></tr> </table> | 1 | 1 = Not at all acceptable | 2 | 2 = Somewhat acceptable | 3 | 3 = Moderately acceptable | 4 | 4 = Very acceptable | 5 | 5 = Extremely acceptable |
| 1   | 1 = Not at all acceptable                                                                           |                                                                                                                                                                                                                   |                                                                                                                                                                                                                                                                                                                         |   |                           |   |                         |   |                           |   |                     |   |                          |
| 2   | 2 = Somewhat acceptable                                                                             |                                                                                                                                                                                                                   |                                                                                                                                                                                                                                                                                                                         |   |                           |   |                         |   |                           |   |                     |   |                          |
| 3   | 3 = Moderately acceptable                                                                           |                                                                                                                                                                                                                   |                                                                                                                                                                                                                                                                                                                         |   |                           |   |                         |   |                           |   |                     |   |                          |
| 4   | 4 = Very acceptable                                                                                 |                                                                                                                                                                                                                   |                                                                                                                                                                                                                                                                                                                         |   |                           |   |                         |   |                           |   |                     |   |                          |
| 5   | 5 = Extremely acceptable                                                                            |                                                                                                                                                                                                                   |                                                                                                                                                                                                                                                                                                                         |   |                           |   |                         |   |                           |   |                     |   |                          |
| 297 | <p>section_5_action_5_c</p> <p>Show the field ONLY if:<br/>[section_5_action_5_yes_no] = '1'</p>    | C. How feasible was it to use bundle-related capitated payments?                                                                                                                                                  | <p>radio, Required</p> <table border="1"> <tr><td>1</td><td>1 = Not at all feasible</td></tr> <tr><td>2</td><td>2 = Somewhat feasible</td></tr> <tr><td>3</td><td>3 = Moderately feasible</td></tr> <tr><td>4</td><td>4 = Very feasible</td></tr> <tr><td>5</td><td>5 = Extremely feasible</td></tr> </table>           | 1 | 1 = Not at all feasible   | 2 | 2 = Somewhat feasible   | 3 | 3 = Moderately feasible   | 4 | 4 = Very feasible   | 5 | 5 = Extremely feasible   |
| 1   | 1 = Not at all feasible                                                                             |                                                                                                                                                                                                                   |                                                                                                                                                                                                                                                                                                                         |   |                           |   |                         |   |                           |   |                     |   |                          |
| 2   | 2 = Somewhat feasible                                                                               |                                                                                                                                                                                                                   |                                                                                                                                                                                                                                                                                                                         |   |                           |   |                         |   |                           |   |                     |   |                          |
| 3   | 3 = Moderately feasible                                                                             |                                                                                                                                                                                                                   |                                                                                                                                                                                                                                                                                                                         |   |                           |   |                         |   |                           |   |                     |   |                          |
| 4   | 4 = Very feasible                                                                                   |                                                                                                                                                                                                                   |                                                                                                                                                                                                                                                                                                                         |   |                           |   |                         |   |                           |   |                     |   |                          |
| 5   | 5 = Extremely feasible                                                                              |                                                                                                                                                                                                                   |                                                                                                                                                                                                                                                                                                                         |   |                           |   |                         |   |                           |   |                     |   |                          |
| 298 | <p>section_5_action_5_d</p> <p>Show the field ONLY if:<br/>[section_5_action_5_yes_no] = '1'</p>    | D. How costly (in terms of staff time, equipment, and other) was using bundle-related capitated payments?                                                                                                         | <p>radio, Required</p> <table border="1"> <tr><td>1</td><td>1 =Not at all costly</td></tr> <tr><td>2</td><td>2 = Somewhat costly</td></tr> <tr><td>3</td><td>3 = Moderately costly</td></tr> <tr><td>4</td><td>4 = Very costly</td></tr> <tr><td>5</td><td>5 = Extremely costly</td></tr> </table>                      | 1 | 1 =Not at all costly      | 2 | 2 = Somewhat costly     | 3 | 3 = Moderately costly     | 4 | 4 = Very costly     | 5 | 5 = Extremely costly     |
| 1   | 1 =Not at all costly                                                                                |                                                                                                                                                                                                                   |                                                                                                                                                                                                                                                                                                                         |   |                           |   |                         |   |                           |   |                     |   |                          |
| 2   | 2 = Somewhat costly                                                                                 |                                                                                                                                                                                                                   |                                                                                                                                                                                                                                                                                                                         |   |                           |   |                         |   |                           |   |                     |   |                          |
| 3   | 3 = Moderately costly                                                                               |                                                                                                                                                                                                                   |                                                                                                                                                                                                                                                                                                                         |   |                           |   |                         |   |                           |   |                     |   |                          |
| 4   | 4 = Very costly                                                                                     |                                                                                                                                                                                                                   |                                                                                                                                                                                                                                                                                                                         |   |                           |   |                         |   |                           |   |                     |   |                          |
| 5   | 5 = Extremely costly                                                                                |                                                                                                                                                                                                                   |                                                                                                                                                                                                                                                                                                                         |   |                           |   |                         |   |                           |   |                     |   |                          |
| 299 | <p>section_5_action_6_yes_no</p>                                                                    | <p>Action 6: Use other payment schemes methods</p> <p>Q: Did your institution introduce payment approaches (in a catch-all category)?</p> <p>If action not used, mark "No" and go to next reflection question</p> | <p>yesno, Required</p> <table border="1"> <tr><td>1</td><td>Yes</td></tr> <tr><td>0</td><td>No</td></tr> </table> <p>Custom alignment: RH</p>                                                                                                                                                                           | 1 | Yes                       | 0 | No                      |   |                           |   |                     |   |                          |
| 1   | Yes                                                                                                 |                                                                                                                                                                                                                   |                                                                                                                                                                                                                                                                                                                         |   |                           |   |                         |   |                           |   |                     |   |                          |
| 0   | No                                                                                                  |                                                                                                                                                                                                                   |                                                                                                                                                                                                                                                                                                                         |   |                           |   |                         |   |                           |   |                     |   |                          |
| 300 | <p>section_5_action_6_text</p> <p>Show the field ONLY if:<br/>[section_5_action_6_yes_no] = '1'</p> | When reflecting on your ICU's ABCDEF bundle implementation efforts:                                                                                                                                               | descriptive                                                                                                                                                                                                                                                                                                             |   |                           |   |                         |   |                           |   |                     |   |                          |
| 301 | <p>section_5_action_6_a</p> <p>Show the field ONLY if:<br/>[section_5_action_6_yes_no] = '1'</p>    | A. How helpful was using other payment approaches for increasing bundle adoption?                                                                                                                                 | <p>radio, Required</p> <table border="1"> <tr><td>1</td><td>1 = Not at all helpful</td></tr> <tr><td>2</td><td>2 = Somewhat helpful</td></tr> <tr><td>3</td><td>3 = Moderately helpful</td></tr> <tr><td>4</td><td>4 = Very helpful</td></tr> <tr><td>5</td><td>5 = Extremely helpful</td></tr> </table>                | 1 | 1 = Not at all helpful    | 2 | 2 = Somewhat helpful    | 3 | 3 = Moderately helpful    | 4 | 4 = Very helpful    | 5 | 5 = Extremely helpful    |
| 1   | 1 = Not at all helpful                                                                              |                                                                                                                                                                                                                   |                                                                                                                                                                                                                                                                                                                         |   |                           |   |                         |   |                           |   |                     |   |                          |
| 2   | 2 = Somewhat helpful                                                                                |                                                                                                                                                                                                                   |                                                                                                                                                                                                                                                                                                                         |   |                           |   |                         |   |                           |   |                     |   |                          |
| 3   | 3 = Moderately helpful                                                                              |                                                                                                                                                                                                                   |                                                                                                                                                                                                                                                                                                                         |   |                           |   |                         |   |                           |   |                     |   |                          |
| 4   | 4 = Very helpful                                                                                    |                                                                                                                                                                                                                   |                                                                                                                                                                                                                                                                                                                         |   |                           |   |                         |   |                           |   |                     |   |                          |
| 5   | 5 = Extremely helpful                                                                               |                                                                                                                                                                                                                   |                                                                                                                                                                                                                                                                                                                         |   |                           |   |                         |   |                           |   |                     |   |                          |
| 302 | <p>section_5_action_6_b</p> <p>Show the field ONLY if:<br/>[section_5_action_6_yes_no] = '1'</p>    | B. How acceptable was using other bundle-related payment approaches among ICU team members?                                                                                                                       | <p>radio, Required</p> <table border="1"> <tr><td>1</td><td>1 = Not at all acceptable</td></tr> <tr><td>2</td><td>2 = Somewhat acceptable</td></tr> <tr><td>3</td><td>3 = Moderately acceptable</td></tr> <tr><td>4</td><td>4 = Very acceptable</td></tr> <tr><td>5</td><td>5 = Extremely acceptable</td></tr> </table> | 1 | 1 = Not at all acceptable | 2 | 2 = Somewhat acceptable | 3 | 3 = Moderately acceptable | 4 | 4 = Very acceptable | 5 | 5 = Extremely acceptable |
| 1   | 1 = Not at all acceptable                                                                           |                                                                                                                                                                                                                   |                                                                                                                                                                                                                                                                                                                         |   |                           |   |                         |   |                           |   |                     |   |                          |
| 2   | 2 = Somewhat acceptable                                                                             |                                                                                                                                                                                                                   |                                                                                                                                                                                                                                                                                                                         |   |                           |   |                         |   |                           |   |                     |   |                          |
| 3   | 3 = Moderately acceptable                                                                           |                                                                                                                                                                                                                   |                                                                                                                                                                                                                                                                                                                         |   |                           |   |                         |   |                           |   |                     |   |                          |
| 4   | 4 = Very acceptable                                                                                 |                                                                                                                                                                                                                   |                                                                                                                                                                                                                                                                                                                         |   |                           |   |                         |   |                           |   |                     |   |                          |
| 5   | 5 = Extremely acceptable                                                                            |                                                                                                                                                                                                                   |                                                                                                                                                                                                                                                                                                                         |   |                           |   |                         |   |                           |   |                     |   |                          |
| 303 | <p>section_5_action_6_c</p> <p>Show the field ONLY if:<br/>[section_5_action_6_yes_no] = '1'</p>    | C. How feasible was it to use other bundle-related payment approaches?                                                                                                                                            | <p>radio, Required</p> <table border="1"> <tr><td>1</td><td>1 = Not at all feasible</td></tr> <tr><td>2</td><td>2 = Somewhat feasible</td></tr> <tr><td>3</td><td>3 = Moderately feasible</td></tr> <tr><td>4</td><td>4 = Very feasible</td></tr> <tr><td>5</td><td>5 = Extremely feasible</td></tr> </table>           | 1 | 1 = Not at all feasible   | 2 | 2 = Somewhat feasible   | 3 | 3 = Moderately feasible   | 4 | 4 = Very feasible   | 5 | 5 = Extremely feasible   |
| 1   | 1 = Not at all feasible                                                                             |                                                                                                                                                                                                                   |                                                                                                                                                                                                                                                                                                                         |   |                           |   |                         |   |                           |   |                     |   |                          |
| 2   | 2 = Somewhat feasible                                                                               |                                                                                                                                                                                                                   |                                                                                                                                                                                                                                                                                                                         |   |                           |   |                         |   |                           |   |                     |   |                          |
| 3   | 3 = Moderately feasible                                                                             |                                                                                                                                                                                                                   |                                                                                                                                                                                                                                                                                                                         |   |                           |   |                         |   |                           |   |                     |   |                          |
| 4   | 4 = Very feasible                                                                                   |                                                                                                                                                                                                                   |                                                                                                                                                                                                                                                                                                                         |   |                           |   |                         |   |                           |   |                     |   |                          |
| 5   | 5 = Extremely feasible                                                                              |                                                                                                                                                                                                                   |                                                                                                                                                                                                                                                                                                                         |   |                           |   |                         |   |                           |   |                     |   |                          |

|     |                                                                                                     |                                                                                                                                                                                                                                                                                                                                                                                     |                                                                                                                                                                                                                                                                                                                         |   |                           |   |                         |   |                           |   |                     |   |                          |
|-----|-----------------------------------------------------------------------------------------------------|-------------------------------------------------------------------------------------------------------------------------------------------------------------------------------------------------------------------------------------------------------------------------------------------------------------------------------------------------------------------------------------|-------------------------------------------------------------------------------------------------------------------------------------------------------------------------------------------------------------------------------------------------------------------------------------------------------------------------|---|---------------------------|---|-------------------------|---|---------------------------|---|---------------------|---|--------------------------|
| 304 | <p>section_5_action_6_d</p> <p>Show the field ONLY if:<br/>[section_5_action_6_yes_no] = '1'</p>    | <p>D. How costly (in terms of staff time, equipment, and other) was using other bundle-related payment approaches?</p>                                                                                                                                                                                                                                                              | <p>radio, Required</p> <table border="1"> <tr><td>1</td><td>1 = Not at all costly</td></tr> <tr><td>2</td><td>2 = Somewhat costly</td></tr> <tr><td>3</td><td>3 = Moderately costly</td></tr> <tr><td>4</td><td>4 = Very costly</td></tr> <tr><td>5</td><td>5 = Extremely costly</td></tr> </table>                     | 1 | 1 = Not at all costly     | 2 | 2 = Somewhat costly     | 3 | 3 = Moderately costly     | 4 | 4 = Very costly     | 5 | 5 = Extremely costly     |
| 1   | 1 = Not at all costly                                                                               |                                                                                                                                                                                                                                                                                                                                                                                     |                                                                                                                                                                                                                                                                                                                         |   |                           |   |                         |   |                           |   |                     |   |                          |
| 2   | 2 = Somewhat costly                                                                                 |                                                                                                                                                                                                                                                                                                                                                                                     |                                                                                                                                                                                                                                                                                                                         |   |                           |   |                         |   |                           |   |                     |   |                          |
| 3   | 3 = Moderately costly                                                                               |                                                                                                                                                                                                                                                                                                                                                                                     |                                                                                                                                                                                                                                                                                                                         |   |                           |   |                         |   |                           |   |                     |   |                          |
| 4   | 4 = Very costly                                                                                     |                                                                                                                                                                                                                                                                                                                                                                                     |                                                                                                                                                                                                                                                                                                                         |   |                           |   |                         |   |                           |   |                     |   |                          |
| 5   | 5 = Extremely costly                                                                                |                                                                                                                                                                                                                                                                                                                                                                                     |                                                                                                                                                                                                                                                                                                                         |   |                           |   |                         |   |                           |   |                     |   |                          |
| 305 | <p>section_5_action_7_yes_no</p>                                                                    | <p>Action 7: Fund and contract for the clinical innovation</p> <p>Q: Did your institution apply for contracts and/or grants to help fund testing and/or application of the ABCDEF bundle?</p> <p>If action not used, mark "No" and go to next reflection question</p>                                                                                                               | <p>yesno, Required</p> <table border="1"> <tr><td>1</td><td>Yes</td></tr> <tr><td>0</td><td>No</td></tr> </table> <p>Custom alignment: RH</p>                                                                                                                                                                           | 1 | Yes                       | 0 | No                      |   |                           |   |                     |   |                          |
| 1   | Yes                                                                                                 |                                                                                                                                                                                                                                                                                                                                                                                     |                                                                                                                                                                                                                                                                                                                         |   |                           |   |                         |   |                           |   |                     |   |                          |
| 0   | No                                                                                                  |                                                                                                                                                                                                                                                                                                                                                                                     |                                                                                                                                                                                                                                                                                                                         |   |                           |   |                         |   |                           |   |                     |   |                          |
| 306 | <p>section_5_action_7_text</p> <p>Show the field ONLY if:<br/>[section_5_action_7_yes_no] = '1'</p> | <p>When reflecting on your ICU's ABCDEF bundle implementation efforts:</p>                                                                                                                                                                                                                                                                                                          | <p>descriptive</p>                                                                                                                                                                                                                                                                                                      |   |                           |   |                         |   |                           |   |                     |   |                          |
| 307 | <p>section_5_action_7_a</p> <p>Show the field ONLY if:<br/>[section_5_action_7_yes_no] = '1'</p>    | <p>A. How helpful was applying for funding and contracting for increasing bundle adoption?</p>                                                                                                                                                                                                                                                                                      | <p>radio, Required</p> <table border="1"> <tr><td>1</td><td>1 = Not at all helpful</td></tr> <tr><td>2</td><td>2 = Somewhat helpful</td></tr> <tr><td>3</td><td>3 = Moderately helpful</td></tr> <tr><td>4</td><td>4 = Very helpful</td></tr> <tr><td>5</td><td>5 = Extremely helpful</td></tr> </table>                | 1 | 1 = Not at all helpful    | 2 | 2 = Somewhat helpful    | 3 | 3 = Moderately helpful    | 4 | 4 = Very helpful    | 5 | 5 = Extremely helpful    |
| 1   | 1 = Not at all helpful                                                                              |                                                                                                                                                                                                                                                                                                                                                                                     |                                                                                                                                                                                                                                                                                                                         |   |                           |   |                         |   |                           |   |                     |   |                          |
| 2   | 2 = Somewhat helpful                                                                                |                                                                                                                                                                                                                                                                                                                                                                                     |                                                                                                                                                                                                                                                                                                                         |   |                           |   |                         |   |                           |   |                     |   |                          |
| 3   | 3 = Moderately helpful                                                                              |                                                                                                                                                                                                                                                                                                                                                                                     |                                                                                                                                                                                                                                                                                                                         |   |                           |   |                         |   |                           |   |                     |   |                          |
| 4   | 4 = Very helpful                                                                                    |                                                                                                                                                                                                                                                                                                                                                                                     |                                                                                                                                                                                                                                                                                                                         |   |                           |   |                         |   |                           |   |                     |   |                          |
| 5   | 5 = Extremely helpful                                                                               |                                                                                                                                                                                                                                                                                                                                                                                     |                                                                                                                                                                                                                                                                                                                         |   |                           |   |                         |   |                           |   |                     |   |                          |
| 308 | <p>section_5_action_7_b</p> <p>Show the field ONLY if:<br/>[section_5_action_7_yes_no] = '1'</p>    | <p>B. How acceptable was applying for bundle-related funding and contracting among ICU team members?</p>                                                                                                                                                                                                                                                                            | <p>radio, Required</p> <table border="1"> <tr><td>1</td><td>1 = Not at all acceptable</td></tr> <tr><td>2</td><td>2 = Somewhat acceptable</td></tr> <tr><td>3</td><td>3 = Moderately acceptable</td></tr> <tr><td>4</td><td>4 = Very acceptable</td></tr> <tr><td>5</td><td>5 = Extremely acceptable</td></tr> </table> | 1 | 1 = Not at all acceptable | 2 | 2 = Somewhat acceptable | 3 | 3 = Moderately acceptable | 4 | 4 = Very acceptable | 5 | 5 = Extremely acceptable |
| 1   | 1 = Not at all acceptable                                                                           |                                                                                                                                                                                                                                                                                                                                                                                     |                                                                                                                                                                                                                                                                                                                         |   |                           |   |                         |   |                           |   |                     |   |                          |
| 2   | 2 = Somewhat acceptable                                                                             |                                                                                                                                                                                                                                                                                                                                                                                     |                                                                                                                                                                                                                                                                                                                         |   |                           |   |                         |   |                           |   |                     |   |                          |
| 3   | 3 = Moderately acceptable                                                                           |                                                                                                                                                                                                                                                                                                                                                                                     |                                                                                                                                                                                                                                                                                                                         |   |                           |   |                         |   |                           |   |                     |   |                          |
| 4   | 4 = Very acceptable                                                                                 |                                                                                                                                                                                                                                                                                                                                                                                     |                                                                                                                                                                                                                                                                                                                         |   |                           |   |                         |   |                           |   |                     |   |                          |
| 5   | 5 = Extremely acceptable                                                                            |                                                                                                                                                                                                                                                                                                                                                                                     |                                                                                                                                                                                                                                                                                                                         |   |                           |   |                         |   |                           |   |                     |   |                          |
| 309 | <p>section_5_action_7_c</p> <p>Show the field ONLY if:<br/>[section_5_action_7_yes_no] = '1'</p>    | <p>C. How feasible was it to apply for bundle-related funding and contracting?</p>                                                                                                                                                                                                                                                                                                  | <p>radio, Required</p> <table border="1"> <tr><td>1</td><td>1 = Not at all feasible</td></tr> <tr><td>2</td><td>2 = Somewhat feasible</td></tr> <tr><td>3</td><td>3 = Moderately feasible</td></tr> <tr><td>4</td><td>4 = Very feasible</td></tr> <tr><td>5</td><td>5 = Extremely feasible</td></tr> </table>           | 1 | 1 = Not at all feasible   | 2 | 2 = Somewhat feasible   | 3 | 3 = Moderately feasible   | 4 | 4 = Very feasible   | 5 | 5 = Extremely feasible   |
| 1   | 1 = Not at all feasible                                                                             |                                                                                                                                                                                                                                                                                                                                                                                     |                                                                                                                                                                                                                                                                                                                         |   |                           |   |                         |   |                           |   |                     |   |                          |
| 2   | 2 = Somewhat feasible                                                                               |                                                                                                                                                                                                                                                                                                                                                                                     |                                                                                                                                                                                                                                                                                                                         |   |                           |   |                         |   |                           |   |                     |   |                          |
| 3   | 3 = Moderately feasible                                                                             |                                                                                                                                                                                                                                                                                                                                                                                     |                                                                                                                                                                                                                                                                                                                         |   |                           |   |                         |   |                           |   |                     |   |                          |
| 4   | 4 = Very feasible                                                                                   |                                                                                                                                                                                                                                                                                                                                                                                     |                                                                                                                                                                                                                                                                                                                         |   |                           |   |                         |   |                           |   |                     |   |                          |
| 5   | 5 = Extremely feasible                                                                              |                                                                                                                                                                                                                                                                                                                                                                                     |                                                                                                                                                                                                                                                                                                                         |   |                           |   |                         |   |                           |   |                     |   |                          |
| 310 | <p>section_5_action_7_d</p> <p>Show the field ONLY if:<br/>[section_5_action_7_yes_no] = '1'</p>    | <p>D. How costly (in terms of staff time, equipment, and other) was applying for bundle-related funding and contracting?</p>                                                                                                                                                                                                                                                        | <p>radio, Required</p> <table border="1"> <tr><td>1</td><td>1 = Not at all costly</td></tr> <tr><td>2</td><td>2 = Somewhat costly</td></tr> <tr><td>3</td><td>3 = Moderately costly</td></tr> <tr><td>4</td><td>4 = Very costly</td></tr> <tr><td>5</td><td>5 = Extremely costly</td></tr> </table>                     | 1 | 1 = Not at all costly     | 2 | 2 = Somewhat costly     | 3 | 3 = Moderately costly     | 4 | 4 = Very costly     | 5 | 5 = Extremely costly     |
| 1   | 1 = Not at all costly                                                                               |                                                                                                                                                                                                                                                                                                                                                                                     |                                                                                                                                                                                                                                                                                                                         |   |                           |   |                         |   |                           |   |                     |   |                          |
| 2   | 2 = Somewhat costly                                                                                 |                                                                                                                                                                                                                                                                                                                                                                                     |                                                                                                                                                                                                                                                                                                                         |   |                           |   |                         |   |                           |   |                     |   |                          |
| 3   | 3 = Moderately costly                                                                               |                                                                                                                                                                                                                                                                                                                                                                                     |                                                                                                                                                                                                                                                                                                                         |   |                           |   |                         |   |                           |   |                     |   |                          |
| 4   | 4 = Very costly                                                                                     |                                                                                                                                                                                                                                                                                                                                                                                     |                                                                                                                                                                                                                                                                                                                         |   |                           |   |                         |   |                           |   |                     |   |                          |
| 5   | 5 = Extremely costly                                                                                |                                                                                                                                                                                                                                                                                                                                                                                     |                                                                                                                                                                                                                                                                                                                         |   |                           |   |                         |   |                           |   |                     |   |                          |
| 311 | <p>section_5_action_8_yes_no</p>                                                                    | <p>Action 8: Place the innovation on fee for service lists/formularies</p> <p>Q: Did your institution work to place the ABCDEF bundle or any of its components on lists of actions for which providers can be reimbursed (e.g., a new drug is placed on the formulary, ambulation is now reimbursable)?</p> <p>If action not used, mark "No" and go to next reflection question</p> | <p>yesno, Required</p> <table border="1"> <tr><td>1</td><td>Yes</td></tr> <tr><td>0</td><td>No</td></tr> </table> <p>Custom alignment: RH</p>                                                                                                                                                                           | 1 | Yes                       | 0 | No                      |   |                           |   |                     |   |                          |
| 1   | Yes                                                                                                 |                                                                                                                                                                                                                                                                                                                                                                                     |                                                                                                                                                                                                                                                                                                                         |   |                           |   |                         |   |                           |   |                     |   |                          |
| 0   | No                                                                                                  |                                                                                                                                                                                                                                                                                                                                                                                     |                                                                                                                                                                                                                                                                                                                         |   |                           |   |                         |   |                           |   |                     |   |                          |
| 312 | <p>section_5_action_8_text</p> <p>Show the field ONLY if:<br/>[section_5_action_8_yes_no] = '1'</p> | <p>When reflecting on your ICU's ABCDEF bundle implementation efforts:</p>                                                                                                                                                                                                                                                                                                          | <p>descriptive</p>                                                                                                                                                                                                                                                                                                      |   |                           |   |                         |   |                           |   |                     |   |                          |

|     |                                                                                         |                                                                                                                                                                                                                           |                                                                                                                                                                                                                                                                                                                     |   |                           |   |                         |   |                           |   |                     |   |                          |
|-----|-----------------------------------------------------------------------------------------|---------------------------------------------------------------------------------------------------------------------------------------------------------------------------------------------------------------------------|---------------------------------------------------------------------------------------------------------------------------------------------------------------------------------------------------------------------------------------------------------------------------------------------------------------------|---|---------------------------|---|-------------------------|---|---------------------------|---|---------------------|---|--------------------------|
| 313 | section_5_action_8_a<br>Show the field ONLY if:<br>[section_5_action_8_yes_no] = '1'    | A. How helpful was placing the bundle or one of its components on a fee for service list/formulary for increasing bundle adoption?                                                                                        | radio, Required<br><table border="1"> <tr><td>1</td><td>1 = Not at all helpful</td></tr> <tr><td>2</td><td>2 = Somewhat helpful</td></tr> <tr><td>3</td><td>3 = Moderately helpful</td></tr> <tr><td>4</td><td>4 = Very helpful</td></tr> <tr><td>5</td><td>5 = Extremely helpful</td></tr> </table>                | 1 | 1 = Not at all helpful    | 2 | 2 = Somewhat helpful    | 3 | 3 = Moderately helpful    | 4 | 4 = Very helpful    | 5 | 5 = Extremely helpful    |
| 1   | 1 = Not at all helpful                                                                  |                                                                                                                                                                                                                           |                                                                                                                                                                                                                                                                                                                     |   |                           |   |                         |   |                           |   |                     |   |                          |
| 2   | 2 = Somewhat helpful                                                                    |                                                                                                                                                                                                                           |                                                                                                                                                                                                                                                                                                                     |   |                           |   |                         |   |                           |   |                     |   |                          |
| 3   | 3 = Moderately helpful                                                                  |                                                                                                                                                                                                                           |                                                                                                                                                                                                                                                                                                                     |   |                           |   |                         |   |                           |   |                     |   |                          |
| 4   | 4 = Very helpful                                                                        |                                                                                                                                                                                                                           |                                                                                                                                                                                                                                                                                                                     |   |                           |   |                         |   |                           |   |                     |   |                          |
| 5   | 5 = Extremely helpful                                                                   |                                                                                                                                                                                                                           |                                                                                                                                                                                                                                                                                                                     |   |                           |   |                         |   |                           |   |                     |   |                          |
| 314 | section_5_action_8_b<br>Show the field ONLY if:<br>[section_5_action_8_yes_no] = '1'    | B. How acceptable was placing the bundle or one of its components on a fee for service list/formulary among ICU team members?                                                                                             | radio, Required<br><table border="1"> <tr><td>1</td><td>1 = Not at all acceptable</td></tr> <tr><td>2</td><td>2 = Somewhat acceptable</td></tr> <tr><td>3</td><td>3 = Moderately acceptable</td></tr> <tr><td>4</td><td>4 = Very acceptable</td></tr> <tr><td>5</td><td>5 = Extremely acceptable</td></tr> </table> | 1 | 1 = Not at all acceptable | 2 | 2 = Somewhat acceptable | 3 | 3 = Moderately acceptable | 4 | 4 = Very acceptable | 5 | 5 = Extremely acceptable |
| 1   | 1 = Not at all acceptable                                                               |                                                                                                                                                                                                                           |                                                                                                                                                                                                                                                                                                                     |   |                           |   |                         |   |                           |   |                     |   |                          |
| 2   | 2 = Somewhat acceptable                                                                 |                                                                                                                                                                                                                           |                                                                                                                                                                                                                                                                                                                     |   |                           |   |                         |   |                           |   |                     |   |                          |
| 3   | 3 = Moderately acceptable                                                               |                                                                                                                                                                                                                           |                                                                                                                                                                                                                                                                                                                     |   |                           |   |                         |   |                           |   |                     |   |                          |
| 4   | 4 = Very acceptable                                                                     |                                                                                                                                                                                                                           |                                                                                                                                                                                                                                                                                                                     |   |                           |   |                         |   |                           |   |                     |   |                          |
| 5   | 5 = Extremely acceptable                                                                |                                                                                                                                                                                                                           |                                                                                                                                                                                                                                                                                                                     |   |                           |   |                         |   |                           |   |                     |   |                          |
| 315 | section_5_action_8_c<br>Show the field ONLY if:<br>[section_5_action_8_yes_no] = '1'    | C. How feasible was it to place the bundle or one of its components on a fee for service list/formulary?                                                                                                                  | radio, Required<br><table border="1"> <tr><td>1</td><td>1 = Not at all feasible</td></tr> <tr><td>2</td><td>2 = Somewhat feasible</td></tr> <tr><td>3</td><td>3 = Moderately feasible</td></tr> <tr><td>4</td><td>4 = Very feasible</td></tr> <tr><td>5</td><td>5 = Extremely feasible</td></tr> </table>           | 1 | 1 = Not at all feasible   | 2 | 2 = Somewhat feasible   | 3 | 3 = Moderately feasible   | 4 | 4 = Very feasible   | 5 | 5 = Extremely feasible   |
| 1   | 1 = Not at all feasible                                                                 |                                                                                                                                                                                                                           |                                                                                                                                                                                                                                                                                                                     |   |                           |   |                         |   |                           |   |                     |   |                          |
| 2   | 2 = Somewhat feasible                                                                   |                                                                                                                                                                                                                           |                                                                                                                                                                                                                                                                                                                     |   |                           |   |                         |   |                           |   |                     |   |                          |
| 3   | 3 = Moderately feasible                                                                 |                                                                                                                                                                                                                           |                                                                                                                                                                                                                                                                                                                     |   |                           |   |                         |   |                           |   |                     |   |                          |
| 4   | 4 = Very feasible                                                                       |                                                                                                                                                                                                                           |                                                                                                                                                                                                                                                                                                                     |   |                           |   |                         |   |                           |   |                     |   |                          |
| 5   | 5 = Extremely feasible                                                                  |                                                                                                                                                                                                                           |                                                                                                                                                                                                                                                                                                                     |   |                           |   |                         |   |                           |   |                     |   |                          |
| 316 | section_5_action_8_d<br>Show the field ONLY if:<br>[section_5_action_8_yes_no] = '1'    | D. How costly (in terms of staff time, equipment, and other) was placing the bundle or one of its components on a fee for service list/formulary?                                                                         | radio, Required<br><table border="1"> <tr><td>1</td><td>1 =Not at all costly</td></tr> <tr><td>2</td><td>2 = Somewhat costly</td></tr> <tr><td>3</td><td>3 = Moderately costly</td></tr> <tr><td>4</td><td>4 = Very costly</td></tr> <tr><td>5</td><td>5 = Extremely costly</td></tr> </table>                      | 1 | 1 =Not at all costly      | 2 | 2 = Somewhat costly     | 3 | 3 = Moderately costly     | 4 | 4 = Very costly     | 5 | 5 = Extremely costly     |
| 1   | 1 =Not at all costly                                                                    |                                                                                                                                                                                                                           |                                                                                                                                                                                                                                                                                                                     |   |                           |   |                         |   |                           |   |                     |   |                          |
| 2   | 2 = Somewhat costly                                                                     |                                                                                                                                                                                                                           |                                                                                                                                                                                                                                                                                                                     |   |                           |   |                         |   |                           |   |                     |   |                          |
| 3   | 3 = Moderately costly                                                                   |                                                                                                                                                                                                                           |                                                                                                                                                                                                                                                                                                                     |   |                           |   |                         |   |                           |   |                     |   |                          |
| 4   | 4 = Very costly                                                                         |                                                                                                                                                                                                                           |                                                                                                                                                                                                                                                                                                                     |   |                           |   |                         |   |                           |   |                     |   |                          |
| 5   | 5 = Extremely costly                                                                    |                                                                                                                                                                                                                           |                                                                                                                                                                                                                                                                                                                     |   |                           |   |                         |   |                           |   |                     |   |                          |
| 317 | section_5_action_9_yes_no                                                               | Action 9: Develop disincentives<br><br>Q: Did your institution provide financial disincentives for failure to implement or use the ABCDEF bundle?<br><br>If action not used, mark "No" and go to next reflection question | yesno, Required<br><table border="1"> <tr><td>1</td><td>Yes</td></tr> <tr><td>0</td><td>No</td></tr> </table> Custom alignment: RH                                                                                                                                                                                  | 1 | Yes                       | 0 | No                      |   |                           |   |                     |   |                          |
| 1   | Yes                                                                                     |                                                                                                                                                                                                                           |                                                                                                                                                                                                                                                                                                                     |   |                           |   |                         |   |                           |   |                     |   |                          |
| 0   | No                                                                                      |                                                                                                                                                                                                                           |                                                                                                                                                                                                                                                                                                                     |   |                           |   |                         |   |                           |   |                     |   |                          |
| 318 | section_5_action_9_text<br>Show the field ONLY if:<br>[section_5_action_9_yes_no] = '1' | When reflecting on your ICU's ABCDEF bundle implementation efforts:                                                                                                                                                       | descriptive                                                                                                                                                                                                                                                                                                         |   |                           |   |                         |   |                           |   |                     |   |                          |
| 319 | section_5_action_9_a<br>Show the field ONLY if:<br>[section_5_action_9_yes_no] = '1'    | A. How helpful was developing disincentives for increasing bundle adoption?                                                                                                                                               | radio, Required<br><table border="1"> <tr><td>1</td><td>1 = Not at all helpful</td></tr> <tr><td>2</td><td>2 = Somewhat helpful</td></tr> <tr><td>3</td><td>3 = Moderately helpful</td></tr> <tr><td>4</td><td>4 = Very helpful</td></tr> <tr><td>5</td><td>5 = Extremely helpful</td></tr> </table>                | 1 | 1 = Not at all helpful    | 2 | 2 = Somewhat helpful    | 3 | 3 = Moderately helpful    | 4 | 4 = Very helpful    | 5 | 5 = Extremely helpful    |
| 1   | 1 = Not at all helpful                                                                  |                                                                                                                                                                                                                           |                                                                                                                                                                                                                                                                                                                     |   |                           |   |                         |   |                           |   |                     |   |                          |
| 2   | 2 = Somewhat helpful                                                                    |                                                                                                                                                                                                                           |                                                                                                                                                                                                                                                                                                                     |   |                           |   |                         |   |                           |   |                     |   |                          |
| 3   | 3 = Moderately helpful                                                                  |                                                                                                                                                                                                                           |                                                                                                                                                                                                                                                                                                                     |   |                           |   |                         |   |                           |   |                     |   |                          |
| 4   | 4 = Very helpful                                                                        |                                                                                                                                                                                                                           |                                                                                                                                                                                                                                                                                                                     |   |                           |   |                         |   |                           |   |                     |   |                          |
| 5   | 5 = Extremely helpful                                                                   |                                                                                                                                                                                                                           |                                                                                                                                                                                                                                                                                                                     |   |                           |   |                         |   |                           |   |                     |   |                          |
| 320 | section_5_action_9_b<br>Show the field ONLY if:<br>[section_5_action_9_yes_no] = '1'    | B. How acceptable was developing disincentives for failure to use the bundle among ICU team members?                                                                                                                      | radio, Required<br><table border="1"> <tr><td>1</td><td>1 = Not at all acceptable</td></tr> <tr><td>2</td><td>2 = Somewhat acceptable</td></tr> <tr><td>3</td><td>3 = Moderately acceptable</td></tr> <tr><td>4</td><td>4 = Very acceptable</td></tr> <tr><td>5</td><td>5 = Extremely acceptable</td></tr> </table> | 1 | 1 = Not at all acceptable | 2 | 2 = Somewhat acceptable | 3 | 3 = Moderately acceptable | 4 | 4 = Very acceptable | 5 | 5 = Extremely acceptable |
| 1   | 1 = Not at all acceptable                                                               |                                                                                                                                                                                                                           |                                                                                                                                                                                                                                                                                                                     |   |                           |   |                         |   |                           |   |                     |   |                          |
| 2   | 2 = Somewhat acceptable                                                                 |                                                                                                                                                                                                                           |                                                                                                                                                                                                                                                                                                                     |   |                           |   |                         |   |                           |   |                     |   |                          |
| 3   | 3 = Moderately acceptable                                                               |                                                                                                                                                                                                                           |                                                                                                                                                                                                                                                                                                                     |   |                           |   |                         |   |                           |   |                     |   |                          |
| 4   | 4 = Very acceptable                                                                     |                                                                                                                                                                                                                           |                                                                                                                                                                                                                                                                                                                     |   |                           |   |                         |   |                           |   |                     |   |                          |
| 5   | 5 = Extremely acceptable                                                                |                                                                                                                                                                                                                           |                                                                                                                                                                                                                                                                                                                     |   |                           |   |                         |   |                           |   |                     |   |                          |
| 321 | section_5_action_9_c<br>Show the field ONLY if:<br>[section_5_action_9_yes_no] = '1'    | C. How feasible was it develop disincentives for failure to use the bundle?                                                                                                                                               | radio, Required<br><table border="1"> <tr><td>1</td><td>1 = Not at all feasible</td></tr> <tr><td>2</td><td>2 = Somewhat feasible</td></tr> <tr><td>3</td><td>3 = Moderately feasible</td></tr> <tr><td>4</td><td>4 = Very feasible</td></tr> <tr><td>5</td><td>5 = Extremely feasible</td></tr> </table>           | 1 | 1 = Not at all feasible   | 2 | 2 = Somewhat feasible   | 3 | 3 = Moderately feasible   | 4 | 4 = Very feasible   | 5 | 5 = Extremely feasible   |
| 1   | 1 = Not at all feasible                                                                 |                                                                                                                                                                                                                           |                                                                                                                                                                                                                                                                                                                     |   |                           |   |                         |   |                           |   |                     |   |                          |
| 2   | 2 = Somewhat feasible                                                                   |                                                                                                                                                                                                                           |                                                                                                                                                                                                                                                                                                                     |   |                           |   |                         |   |                           |   |                     |   |                          |
| 3   | 3 = Moderately feasible                                                                 |                                                                                                                                                                                                                           |                                                                                                                                                                                                                                                                                                                     |   |                           |   |                         |   |                           |   |                     |   |                          |
| 4   | 4 = Very feasible                                                                       |                                                                                                                                                                                                                           |                                                                                                                                                                                                                                                                                                                     |   |                           |   |                         |   |                           |   |                     |   |                          |
| 5   | 5 = Extremely feasible                                                                  |                                                                                                                                                                                                                           |                                                                                                                                                                                                                                                                                                                     |   |                           |   |                         |   |                           |   |                     |   |                          |

|     |                                                                                                     |                                                                                                                                                                                                                                                                                                                                                 |                                                                                                                                                                                                                                                                                                                         |   |                           |   |                         |   |                           |   |                     |   |                          |
|-----|-----------------------------------------------------------------------------------------------------|-------------------------------------------------------------------------------------------------------------------------------------------------------------------------------------------------------------------------------------------------------------------------------------------------------------------------------------------------|-------------------------------------------------------------------------------------------------------------------------------------------------------------------------------------------------------------------------------------------------------------------------------------------------------------------------|---|---------------------------|---|-------------------------|---|---------------------------|---|---------------------|---|--------------------------|
| 322 | <p>section_5_action_9_d</p> <p>Show the field ONLY if:<br/>[section_5_action_9_yes_no] = '1'</p>    | <p>D. How costly (in terms of staff time, equipment, and other) was developing disincentives for failure to use the bundle?</p>                                                                                                                                                                                                                 | <p>radio, Required</p> <table border="1"> <tr><td>1</td><td>1 = Not at all costly</td></tr> <tr><td>2</td><td>2 = Somewhat costly</td></tr> <tr><td>3</td><td>3 = Moderately costly</td></tr> <tr><td>4</td><td>4 = Very costly</td></tr> <tr><td>5</td><td>5 = Extremely costly</td></tr> </table>                     | 1 | 1 = Not at all costly     | 2 | 2 = Somewhat costly     | 3 | 3 = Moderately costly     | 4 | 4 = Very costly     | 5 | 5 = Extremely costly     |
| 1   | 1 = Not at all costly                                                                               |                                                                                                                                                                                                                                                                                                                                                 |                                                                                                                                                                                                                                                                                                                         |   |                           |   |                         |   |                           |   |                     |   |                          |
| 2   | 2 = Somewhat costly                                                                                 |                                                                                                                                                                                                                                                                                                                                                 |                                                                                                                                                                                                                                                                                                                         |   |                           |   |                         |   |                           |   |                     |   |                          |
| 3   | 3 = Moderately costly                                                                               |                                                                                                                                                                                                                                                                                                                                                 |                                                                                                                                                                                                                                                                                                                         |   |                           |   |                         |   |                           |   |                     |   |                          |
| 4   | 4 = Very costly                                                                                     |                                                                                                                                                                                                                                                                                                                                                 |                                                                                                                                                                                                                                                                                                                         |   |                           |   |                         |   |                           |   |                     |   |                          |
| 5   | 5 = Extremely costly                                                                                |                                                                                                                                                                                                                                                                                                                                                 |                                                                                                                                                                                                                                                                                                                         |   |                           |   |                         |   |                           |   |                     |   |                          |
| 323 | <p>section_6_text</p>                                                                               | <p>Section Header:<br/>SECTION 6: PROVIDE INTERACTIVE ASSISTANCE (4 QUESTIONS)</p>                                                                                                                                                                                                                                                              | <p>descriptive</p>                                                                                                                                                                                                                                                                                                      |   |                           |   |                         |   |                           |   |                     |   |                          |
| 324 | <p>section_6_action_1_yes_no</p>                                                                    | <p>Action 1: Provide local technical assistance</p> <p>Q: Did your institution develop and use a system to deliver technical assistance focused on ABCDEF bundle implementation issues using local personnel?</p> <p>If action not used, mark "No" and go to next reflection question</p>                                                       | <p>yesno, Required</p> <table border="1"> <tr><td>1</td><td>Yes</td></tr> <tr><td>0</td><td>No</td></tr> </table> <p>Custom alignment: RH</p>                                                                                                                                                                           | 1 | Yes                       | 0 | No                      |   |                           |   |                     |   |                          |
| 1   | Yes                                                                                                 |                                                                                                                                                                                                                                                                                                                                                 |                                                                                                                                                                                                                                                                                                                         |   |                           |   |                         |   |                           |   |                     |   |                          |
| 0   | No                                                                                                  |                                                                                                                                                                                                                                                                                                                                                 |                                                                                                                                                                                                                                                                                                                         |   |                           |   |                         |   |                           |   |                     |   |                          |
| 325 | <p>section_6_action_1_text</p> <p>Show the field ONLY if:<br/>[section_6_action_1_yes_no] = '1'</p> | <p>When reflecting on your ICU's ABCDEF bundle implementation efforts:</p>                                                                                                                                                                                                                                                                      | <p>descriptive</p>                                                                                                                                                                                                                                                                                                      |   |                           |   |                         |   |                           |   |                     |   |                          |
| 326 | <p>section_6_action_1_a</p> <p>Show the field ONLY if:<br/>[section_6_action_1_yes_no] = '1'</p>    | <p>A. How helpful was providing local technical assistance for increasing bundle adoption?</p>                                                                                                                                                                                                                                                  | <p>radio, Required</p> <table border="1"> <tr><td>1</td><td>1 = Not at all helpful</td></tr> <tr><td>2</td><td>2 = Somewhat helpful</td></tr> <tr><td>3</td><td>3 = Moderately helpful</td></tr> <tr><td>4</td><td>4 = Very helpful</td></tr> <tr><td>5</td><td>5 = Extremely helpful</td></tr> </table>                | 1 | 1 = Not at all helpful    | 2 | 2 = Somewhat helpful    | 3 | 3 = Moderately helpful    | 4 | 4 = Very helpful    | 5 | 5 = Extremely helpful    |
| 1   | 1 = Not at all helpful                                                                              |                                                                                                                                                                                                                                                                                                                                                 |                                                                                                                                                                                                                                                                                                                         |   |                           |   |                         |   |                           |   |                     |   |                          |
| 2   | 2 = Somewhat helpful                                                                                |                                                                                                                                                                                                                                                                                                                                                 |                                                                                                                                                                                                                                                                                                                         |   |                           |   |                         |   |                           |   |                     |   |                          |
| 3   | 3 = Moderately helpful                                                                              |                                                                                                                                                                                                                                                                                                                                                 |                                                                                                                                                                                                                                                                                                                         |   |                           |   |                         |   |                           |   |                     |   |                          |
| 4   | 4 = Very helpful                                                                                    |                                                                                                                                                                                                                                                                                                                                                 |                                                                                                                                                                                                                                                                                                                         |   |                           |   |                         |   |                           |   |                     |   |                          |
| 5   | 5 = Extremely helpful                                                                               |                                                                                                                                                                                                                                                                                                                                                 |                                                                                                                                                                                                                                                                                                                         |   |                           |   |                         |   |                           |   |                     |   |                          |
| 327 | <p>section_6_action_1_b</p> <p>Show the field ONLY if:<br/>[section_6_action_1_yes_no] = '1'</p>    | <p>B. How acceptable was providing local bundle-related technical assistance among ICU team members?</p>                                                                                                                                                                                                                                        | <p>radio, Required</p> <table border="1"> <tr><td>1</td><td>1 = Not at all acceptable</td></tr> <tr><td>2</td><td>2 = Somewhat acceptable</td></tr> <tr><td>3</td><td>3 = Moderately acceptable</td></tr> <tr><td>4</td><td>4 = Very acceptable</td></tr> <tr><td>5</td><td>5 = Extremely acceptable</td></tr> </table> | 1 | 1 = Not at all acceptable | 2 | 2 = Somewhat acceptable | 3 | 3 = Moderately acceptable | 4 | 4 = Very acceptable | 5 | 5 = Extremely acceptable |
| 1   | 1 = Not at all acceptable                                                                           |                                                                                                                                                                                                                                                                                                                                                 |                                                                                                                                                                                                                                                                                                                         |   |                           |   |                         |   |                           |   |                     |   |                          |
| 2   | 2 = Somewhat acceptable                                                                             |                                                                                                                                                                                                                                                                                                                                                 |                                                                                                                                                                                                                                                                                                                         |   |                           |   |                         |   |                           |   |                     |   |                          |
| 3   | 3 = Moderately acceptable                                                                           |                                                                                                                                                                                                                                                                                                                                                 |                                                                                                                                                                                                                                                                                                                         |   |                           |   |                         |   |                           |   |                     |   |                          |
| 4   | 4 = Very acceptable                                                                                 |                                                                                                                                                                                                                                                                                                                                                 |                                                                                                                                                                                                                                                                                                                         |   |                           |   |                         |   |                           |   |                     |   |                          |
| 5   | 5 = Extremely acceptable                                                                            |                                                                                                                                                                                                                                                                                                                                                 |                                                                                                                                                                                                                                                                                                                         |   |                           |   |                         |   |                           |   |                     |   |                          |
| 328 | <p>section_6_action_1_c</p> <p>Show the field ONLY if:<br/>[section_6_action_1_yes_no] = '1'</p>    | <p>C. How feasible was it to provide local bundle-related technical assistance?</p>                                                                                                                                                                                                                                                             | <p>radio, Required</p> <table border="1"> <tr><td>1</td><td>1 = Not at all feasible</td></tr> <tr><td>2</td><td>2 = Somewhat feasible</td></tr> <tr><td>3</td><td>3 = Moderately feasible</td></tr> <tr><td>4</td><td>4 = Very feasible</td></tr> <tr><td>5</td><td>5 = Extremely feasible</td></tr> </table>           | 1 | 1 = Not at all feasible   | 2 | 2 = Somewhat feasible   | 3 | 3 = Moderately feasible   | 4 | 4 = Very feasible   | 5 | 5 = Extremely feasible   |
| 1   | 1 = Not at all feasible                                                                             |                                                                                                                                                                                                                                                                                                                                                 |                                                                                                                                                                                                                                                                                                                         |   |                           |   |                         |   |                           |   |                     |   |                          |
| 2   | 2 = Somewhat feasible                                                                               |                                                                                                                                                                                                                                                                                                                                                 |                                                                                                                                                                                                                                                                                                                         |   |                           |   |                         |   |                           |   |                     |   |                          |
| 3   | 3 = Moderately feasible                                                                             |                                                                                                                                                                                                                                                                                                                                                 |                                                                                                                                                                                                                                                                                                                         |   |                           |   |                         |   |                           |   |                     |   |                          |
| 4   | 4 = Very feasible                                                                                   |                                                                                                                                                                                                                                                                                                                                                 |                                                                                                                                                                                                                                                                                                                         |   |                           |   |                         |   |                           |   |                     |   |                          |
| 5   | 5 = Extremely feasible                                                                              |                                                                                                                                                                                                                                                                                                                                                 |                                                                                                                                                                                                                                                                                                                         |   |                           |   |                         |   |                           |   |                     |   |                          |
| 329 | <p>section_6_action_1_d</p> <p>Show the field ONLY if:<br/>[section_6_action_1_yes_no] = '1'</p>    | <p>D. How costly (in terms of staff time, equipment, and other) was providing local bundle-related technical assistance?</p>                                                                                                                                                                                                                    | <p>radio, Required</p> <table border="1"> <tr><td>1</td><td>1 = Not at all costly</td></tr> <tr><td>2</td><td>2 = Somewhat costly</td></tr> <tr><td>3</td><td>3 = Moderately costly</td></tr> <tr><td>4</td><td>4 = Very costly</td></tr> <tr><td>5</td><td>5 = Extremely costly</td></tr> </table>                     | 1 | 1 = Not at all costly     | 2 | 2 = Somewhat costly     | 3 | 3 = Moderately costly     | 4 | 4 = Very costly     | 5 | 5 = Extremely costly     |
| 1   | 1 = Not at all costly                                                                               |                                                                                                                                                                                                                                                                                                                                                 |                                                                                                                                                                                                                                                                                                                         |   |                           |   |                         |   |                           |   |                     |   |                          |
| 2   | 2 = Somewhat costly                                                                                 |                                                                                                                                                                                                                                                                                                                                                 |                                                                                                                                                                                                                                                                                                                         |   |                           |   |                         |   |                           |   |                     |   |                          |
| 3   | 3 = Moderately costly                                                                               |                                                                                                                                                                                                                                                                                                                                                 |                                                                                                                                                                                                                                                                                                                         |   |                           |   |                         |   |                           |   |                     |   |                          |
| 4   | 4 = Very costly                                                                                     |                                                                                                                                                                                                                                                                                                                                                 |                                                                                                                                                                                                                                                                                                                         |   |                           |   |                         |   |                           |   |                     |   |                          |
| 5   | 5 = Extremely costly                                                                                |                                                                                                                                                                                                                                                                                                                                                 |                                                                                                                                                                                                                                                                                                                         |   |                           |   |                         |   |                           |   |                     |   |                          |
| 330 | <p>section_6_action_2_yes_no</p>                                                                    | <p>Action 2: Provide clinical supervision</p> <p>Q: Did your institution provide clinicians with ongoing supervision focusing on the ABCDEF bundle? This includes providing training for clinical supervisors who will supervise clinicians who provide the bundle.</p> <p>If action not used, mark "No" and go to next reflection question</p> | <p>yesno, Required</p> <table border="1"> <tr><td>1</td><td>Yes</td></tr> <tr><td>0</td><td>No</td></tr> </table> <p>Custom alignment: RH</p>                                                                                                                                                                           | 1 | Yes                       | 0 | No                      |   |                           |   |                     |   |                          |
| 1   | Yes                                                                                                 |                                                                                                                                                                                                                                                                                                                                                 |                                                                                                                                                                                                                                                                                                                         |   |                           |   |                         |   |                           |   |                     |   |                          |
| 0   | No                                                                                                  |                                                                                                                                                                                                                                                                                                                                                 |                                                                                                                                                                                                                                                                                                                         |   |                           |   |                         |   |                           |   |                     |   |                          |
| 331 | <p>section_6_action_2_text</p> <p>Show the field ONLY if:<br/>[section_6_action_2_yes_no] = '1'</p> | <p>When reflecting on your ICU's ABCDEF bundle implementation efforts:</p>                                                                                                                                                                                                                                                                      | <p>descriptive</p>                                                                                                                                                                                                                                                                                                      |   |                           |   |                         |   |                           |   |                     |   |                          |

|     |                                                                                                     |                                                                                                                                                                                                                                                                              |                                                                                                                                                                                                                                                                                                                         |   |                           |   |                         |   |                           |   |                     |   |                          |
|-----|-----------------------------------------------------------------------------------------------------|------------------------------------------------------------------------------------------------------------------------------------------------------------------------------------------------------------------------------------------------------------------------------|-------------------------------------------------------------------------------------------------------------------------------------------------------------------------------------------------------------------------------------------------------------------------------------------------------------------------|---|---------------------------|---|-------------------------|---|---------------------------|---|---------------------|---|--------------------------|
| 332 | <p>section_6_action_2_a</p> <p>Show the field ONLY if:<br/>[section_6_action_2_yes_no] = '1'</p>    | <p>A. How helpful was providing clinical supervision for increasing bundle adoption?</p>                                                                                                                                                                                     | <p>radio, Required</p> <table border="1"> <tr><td>1</td><td>1 = Not at all helpful</td></tr> <tr><td>2</td><td>2 = Somewhat helpful</td></tr> <tr><td>3</td><td>3 = Moderately helpful</td></tr> <tr><td>4</td><td>4 = Very helpful</td></tr> <tr><td>5</td><td>5 = Extremely helpful</td></tr> </table>                | 1 | 1 = Not at all helpful    | 2 | 2 = Somewhat helpful    | 3 | 3 = Moderately helpful    | 4 | 4 = Very helpful    | 5 | 5 = Extremely helpful    |
| 1   | 1 = Not at all helpful                                                                              |                                                                                                                                                                                                                                                                              |                                                                                                                                                                                                                                                                                                                         |   |                           |   |                         |   |                           |   |                     |   |                          |
| 2   | 2 = Somewhat helpful                                                                                |                                                                                                                                                                                                                                                                              |                                                                                                                                                                                                                                                                                                                         |   |                           |   |                         |   |                           |   |                     |   |                          |
| 3   | 3 = Moderately helpful                                                                              |                                                                                                                                                                                                                                                                              |                                                                                                                                                                                                                                                                                                                         |   |                           |   |                         |   |                           |   |                     |   |                          |
| 4   | 4 = Very helpful                                                                                    |                                                                                                                                                                                                                                                                              |                                                                                                                                                                                                                                                                                                                         |   |                           |   |                         |   |                           |   |                     |   |                          |
| 5   | 5 = Extremely helpful                                                                               |                                                                                                                                                                                                                                                                              |                                                                                                                                                                                                                                                                                                                         |   |                           |   |                         |   |                           |   |                     |   |                          |
| 333 | <p>section_6_action_2_b</p> <p>Show the field ONLY if:<br/>[section_6_action_2_yes_no] = '1'</p>    | <p>B. How acceptable was providing bundle-related clinical supervision among ICU team members?</p>                                                                                                                                                                           | <p>radio, Required</p> <table border="1"> <tr><td>1</td><td>1 = Not at all acceptable</td></tr> <tr><td>2</td><td>2 = Somewhat acceptable</td></tr> <tr><td>3</td><td>3 = Moderately acceptable</td></tr> <tr><td>4</td><td>4 = Very acceptable</td></tr> <tr><td>5</td><td>5 = Extremely acceptable</td></tr> </table> | 1 | 1 = Not at all acceptable | 2 | 2 = Somewhat acceptable | 3 | 3 = Moderately acceptable | 4 | 4 = Very acceptable | 5 | 5 = Extremely acceptable |
| 1   | 1 = Not at all acceptable                                                                           |                                                                                                                                                                                                                                                                              |                                                                                                                                                                                                                                                                                                                         |   |                           |   |                         |   |                           |   |                     |   |                          |
| 2   | 2 = Somewhat acceptable                                                                             |                                                                                                                                                                                                                                                                              |                                                                                                                                                                                                                                                                                                                         |   |                           |   |                         |   |                           |   |                     |   |                          |
| 3   | 3 = Moderately acceptable                                                                           |                                                                                                                                                                                                                                                                              |                                                                                                                                                                                                                                                                                                                         |   |                           |   |                         |   |                           |   |                     |   |                          |
| 4   | 4 = Very acceptable                                                                                 |                                                                                                                                                                                                                                                                              |                                                                                                                                                                                                                                                                                                                         |   |                           |   |                         |   |                           |   |                     |   |                          |
| 5   | 5 = Extremely acceptable                                                                            |                                                                                                                                                                                                                                                                              |                                                                                                                                                                                                                                                                                                                         |   |                           |   |                         |   |                           |   |                     |   |                          |
| 334 | <p>section_6_action_2_c</p> <p>Show the field ONLY if:<br/>[section_6_action_2_yes_no] = '1'</p>    | <p>C. How feasible was it to provide bundle-related clinical supervision?</p>                                                                                                                                                                                                | <p>radio, Required</p> <table border="1"> <tr><td>1</td><td>1 = Not at all feasible</td></tr> <tr><td>2</td><td>2 = Somewhat feasible</td></tr> <tr><td>3</td><td>3 = Moderately feasible</td></tr> <tr><td>4</td><td>4 = Very feasible</td></tr> <tr><td>5</td><td>5 = Extremely feasible</td></tr> </table>           | 1 | 1 = Not at all feasible   | 2 | 2 = Somewhat feasible   | 3 | 3 = Moderately feasible   | 4 | 4 = Very feasible   | 5 | 5 = Extremely feasible   |
| 1   | 1 = Not at all feasible                                                                             |                                                                                                                                                                                                                                                                              |                                                                                                                                                                                                                                                                                                                         |   |                           |   |                         |   |                           |   |                     |   |                          |
| 2   | 2 = Somewhat feasible                                                                               |                                                                                                                                                                                                                                                                              |                                                                                                                                                                                                                                                                                                                         |   |                           |   |                         |   |                           |   |                     |   |                          |
| 3   | 3 = Moderately feasible                                                                             |                                                                                                                                                                                                                                                                              |                                                                                                                                                                                                                                                                                                                         |   |                           |   |                         |   |                           |   |                     |   |                          |
| 4   | 4 = Very feasible                                                                                   |                                                                                                                                                                                                                                                                              |                                                                                                                                                                                                                                                                                                                         |   |                           |   |                         |   |                           |   |                     |   |                          |
| 5   | 5 = Extremely feasible                                                                              |                                                                                                                                                                                                                                                                              |                                                                                                                                                                                                                                                                                                                         |   |                           |   |                         |   |                           |   |                     |   |                          |
| 335 | <p>section_6_action_2_d</p> <p>Show the field ONLY if:<br/>[section_6_action_2_yes_no] = '1'</p>    | <p>D. How costly (in terms of staff time, equipment, and other) was providing bundle-related clinical supervision?</p>                                                                                                                                                       | <p>radio, Required</p> <table border="1"> <tr><td>1</td><td>1 =Not at all costly</td></tr> <tr><td>2</td><td>2 = Somewhat costly</td></tr> <tr><td>3</td><td>3 = Moderately costly</td></tr> <tr><td>4</td><td>4 = Very costly</td></tr> <tr><td>5</td><td>5 = Extremely costly</td></tr> </table>                      | 1 | 1 =Not at all costly      | 2 | 2 = Somewhat costly     | 3 | 3 = Moderately costly     | 4 | 4 = Very costly     | 5 | 5 = Extremely costly     |
| 1   | 1 =Not at all costly                                                                                |                                                                                                                                                                                                                                                                              |                                                                                                                                                                                                                                                                                                                         |   |                           |   |                         |   |                           |   |                     |   |                          |
| 2   | 2 = Somewhat costly                                                                                 |                                                                                                                                                                                                                                                                              |                                                                                                                                                                                                                                                                                                                         |   |                           |   |                         |   |                           |   |                     |   |                          |
| 3   | 3 = Moderately costly                                                                               |                                                                                                                                                                                                                                                                              |                                                                                                                                                                                                                                                                                                                         |   |                           |   |                         |   |                           |   |                     |   |                          |
| 4   | 4 = Very costly                                                                                     |                                                                                                                                                                                                                                                                              |                                                                                                                                                                                                                                                                                                                         |   |                           |   |                         |   |                           |   |                     |   |                          |
| 5   | 5 = Extremely costly                                                                                |                                                                                                                                                                                                                                                                              |                                                                                                                                                                                                                                                                                                                         |   |                           |   |                         |   |                           |   |                     |   |                          |
| 336 | <p>section_6_action_3_yes_no</p>                                                                    | <p>Action 3: Centralize technical assistance</p> <p>Q: Did your institution develop and use a centralized system to deliver technical assistance focused on ABCDEF bundle implementation issues?</p> <p>If action not used, mark "No" and go to next reflection question</p> | <p>yesno, Required</p> <table border="1"> <tr><td>1</td><td>Yes</td></tr> <tr><td>0</td><td>No</td></tr> </table> <p>Custom alignment: RH</p>                                                                                                                                                                           | 1 | Yes                       | 0 | No                      |   |                           |   |                     |   |                          |
| 1   | Yes                                                                                                 |                                                                                                                                                                                                                                                                              |                                                                                                                                                                                                                                                                                                                         |   |                           |   |                         |   |                           |   |                     |   |                          |
| 0   | No                                                                                                  |                                                                                                                                                                                                                                                                              |                                                                                                                                                                                                                                                                                                                         |   |                           |   |                         |   |                           |   |                     |   |                          |
| 337 | <p>section_6_action_3_text</p> <p>Show the field ONLY if:<br/>[section_6_action_3_yes_no] = '1'</p> | <p>When reflecting on your ICU's ABCDEF bundle implementation efforts:</p>                                                                                                                                                                                                   | <p>descriptive</p>                                                                                                                                                                                                                                                                                                      |   |                           |   |                         |   |                           |   |                     |   |                          |
| 338 | <p>section_6_action_3_a</p> <p>Show the field ONLY if:<br/>[section_6_action_3_yes_no] = '1'</p>    | <p>A. How helpful was centralizing technical assistance for increasing bundle adoption?</p>                                                                                                                                                                                  | <p>radio, Required</p> <table border="1"> <tr><td>1</td><td>1 = Not at all helpful</td></tr> <tr><td>2</td><td>2 = Somewhat helpful</td></tr> <tr><td>3</td><td>3 = Moderately helpful</td></tr> <tr><td>4</td><td>4 = Very helpful</td></tr> <tr><td>5</td><td>5 = Extremely helpful</td></tr> </table>                | 1 | 1 = Not at all helpful    | 2 | 2 = Somewhat helpful    | 3 | 3 = Moderately helpful    | 4 | 4 = Very helpful    | 5 | 5 = Extremely helpful    |
| 1   | 1 = Not at all helpful                                                                              |                                                                                                                                                                                                                                                                              |                                                                                                                                                                                                                                                                                                                         |   |                           |   |                         |   |                           |   |                     |   |                          |
| 2   | 2 = Somewhat helpful                                                                                |                                                                                                                                                                                                                                                                              |                                                                                                                                                                                                                                                                                                                         |   |                           |   |                         |   |                           |   |                     |   |                          |
| 3   | 3 = Moderately helpful                                                                              |                                                                                                                                                                                                                                                                              |                                                                                                                                                                                                                                                                                                                         |   |                           |   |                         |   |                           |   |                     |   |                          |
| 4   | 4 = Very helpful                                                                                    |                                                                                                                                                                                                                                                                              |                                                                                                                                                                                                                                                                                                                         |   |                           |   |                         |   |                           |   |                     |   |                          |
| 5   | 5 = Extremely helpful                                                                               |                                                                                                                                                                                                                                                                              |                                                                                                                                                                                                                                                                                                                         |   |                           |   |                         |   |                           |   |                     |   |                          |
| 339 | <p>section_6_action_3_b</p> <p>Show the field ONLY if:<br/>[section_6_action_3_yes_no] = '1'</p>    | <p>B. How acceptable was centralizing bundle-related technical assistance among ICU team members?</p>                                                                                                                                                                        | <p>radio, Required</p> <table border="1"> <tr><td>1</td><td>1 = Not at all acceptable</td></tr> <tr><td>2</td><td>2 = Somewhat acceptable</td></tr> <tr><td>3</td><td>3 = Moderately acceptable</td></tr> <tr><td>4</td><td>4 = Very acceptable</td></tr> <tr><td>5</td><td>5 = Extremely acceptable</td></tr> </table> | 1 | 1 = Not at all acceptable | 2 | 2 = Somewhat acceptable | 3 | 3 = Moderately acceptable | 4 | 4 = Very acceptable | 5 | 5 = Extremely acceptable |
| 1   | 1 = Not at all acceptable                                                                           |                                                                                                                                                                                                                                                                              |                                                                                                                                                                                                                                                                                                                         |   |                           |   |                         |   |                           |   |                     |   |                          |
| 2   | 2 = Somewhat acceptable                                                                             |                                                                                                                                                                                                                                                                              |                                                                                                                                                                                                                                                                                                                         |   |                           |   |                         |   |                           |   |                     |   |                          |
| 3   | 3 = Moderately acceptable                                                                           |                                                                                                                                                                                                                                                                              |                                                                                                                                                                                                                                                                                                                         |   |                           |   |                         |   |                           |   |                     |   |                          |
| 4   | 4 = Very acceptable                                                                                 |                                                                                                                                                                                                                                                                              |                                                                                                                                                                                                                                                                                                                         |   |                           |   |                         |   |                           |   |                     |   |                          |
| 5   | 5 = Extremely acceptable                                                                            |                                                                                                                                                                                                                                                                              |                                                                                                                                                                                                                                                                                                                         |   |                           |   |                         |   |                           |   |                     |   |                          |
| 340 | <p>section_6_action_3_c</p> <p>Show the field ONLY if:<br/>[section_6_action_3_yes_no] = '1'</p>    | <p>C. How feasible was it to centralize bundle-related technical assistance?</p>                                                                                                                                                                                             | <p>radio, Required</p> <table border="1"> <tr><td>1</td><td>1 = Not at all feasible</td></tr> <tr><td>2</td><td>2 = Somewhat feasible</td></tr> <tr><td>3</td><td>3 = Moderately feasible</td></tr> <tr><td>4</td><td>4 = Very feasible</td></tr> <tr><td>5</td><td>5 = Extremely feasible</td></tr> </table>           | 1 | 1 = Not at all feasible   | 2 | 2 = Somewhat feasible   | 3 | 3 = Moderately feasible   | 4 | 4 = Very feasible   | 5 | 5 = Extremely feasible   |
| 1   | 1 = Not at all feasible                                                                             |                                                                                                                                                                                                                                                                              |                                                                                                                                                                                                                                                                                                                         |   |                           |   |                         |   |                           |   |                     |   |                          |
| 2   | 2 = Somewhat feasible                                                                               |                                                                                                                                                                                                                                                                              |                                                                                                                                                                                                                                                                                                                         |   |                           |   |                         |   |                           |   |                     |   |                          |
| 3   | 3 = Moderately feasible                                                                             |                                                                                                                                                                                                                                                                              |                                                                                                                                                                                                                                                                                                                         |   |                           |   |                         |   |                           |   |                     |   |                          |
| 4   | 4 = Very feasible                                                                                   |                                                                                                                                                                                                                                                                              |                                                                                                                                                                                                                                                                                                                         |   |                           |   |                         |   |                           |   |                     |   |                          |
| 5   | 5 = Extremely feasible                                                                              |                                                                                                                                                                                                                                                                              |                                                                                                                                                                                                                                                                                                                         |   |                           |   |                         |   |                           |   |                     |   |                          |

|     |                                                                                                     |                                                                                                                                                                                                                                                                                                                            |                                                                                                                                                                                                                                                                                                                         |   |                           |   |                         |   |                           |   |                     |   |                          |
|-----|-----------------------------------------------------------------------------------------------------|----------------------------------------------------------------------------------------------------------------------------------------------------------------------------------------------------------------------------------------------------------------------------------------------------------------------------|-------------------------------------------------------------------------------------------------------------------------------------------------------------------------------------------------------------------------------------------------------------------------------------------------------------------------|---|---------------------------|---|-------------------------|---|---------------------------|---|---------------------|---|--------------------------|
| 341 | <p>section_6_action_3_d</p> <p>Show the field ONLY if:<br/>[section_6_action_3_yes_no] = '1'</p>    | <p>D. How costly (in terms of staff time, equipment, and other) was centralizing bundle-related technical assistance?</p>                                                                                                                                                                                                  | <p>radio, Required</p> <table border="1"> <tr><td>1</td><td>1 = Not at all costly</td></tr> <tr><td>2</td><td>2 = Somewhat costly</td></tr> <tr><td>3</td><td>3 = Moderately costly</td></tr> <tr><td>4</td><td>4 = Very costly</td></tr> <tr><td>5</td><td>5 = Extremely costly</td></tr> </table>                     | 1 | 1 = Not at all costly     | 2 | 2 = Somewhat costly     | 3 | 3 = Moderately costly     | 4 | 4 = Very costly     | 5 | 5 = Extremely costly     |
| 1   | 1 = Not at all costly                                                                               |                                                                                                                                                                                                                                                                                                                            |                                                                                                                                                                                                                                                                                                                         |   |                           |   |                         |   |                           |   |                     |   |                          |
| 2   | 2 = Somewhat costly                                                                                 |                                                                                                                                                                                                                                                                                                                            |                                                                                                                                                                                                                                                                                                                         |   |                           |   |                         |   |                           |   |                     |   |                          |
| 3   | 3 = Moderately costly                                                                               |                                                                                                                                                                                                                                                                                                                            |                                                                                                                                                                                                                                                                                                                         |   |                           |   |                         |   |                           |   |                     |   |                          |
| 4   | 4 = Very costly                                                                                     |                                                                                                                                                                                                                                                                                                                            |                                                                                                                                                                                                                                                                                                                         |   |                           |   |                         |   |                           |   |                     |   |                          |
| 5   | 5 = Extremely costly                                                                                |                                                                                                                                                                                                                                                                                                                            |                                                                                                                                                                                                                                                                                                                         |   |                           |   |                         |   |                           |   |                     |   |                          |
| 342 | <p>section_6_action_4_yes_no</p>                                                                    | <p>Action 4: Facilitation</p> <p>Q: Did your institution utilize a process of interactive problem solving and support that occurs in a context of a recognized need for ABCDEF bundle improvement and a supportive interpersonal relationship?</p> <p>If action not used, mark "No" and go to next reflection question</p> | <p>yesno, Required</p> <table border="1"> <tr><td>1</td><td>Yes</td></tr> <tr><td>0</td><td>No</td></tr> </table> <p>Custom alignment: RH</p>                                                                                                                                                                           | 1 | Yes                       | 0 | No                      |   |                           |   |                     |   |                          |
| 1   | Yes                                                                                                 |                                                                                                                                                                                                                                                                                                                            |                                                                                                                                                                                                                                                                                                                         |   |                           |   |                         |   |                           |   |                     |   |                          |
| 0   | No                                                                                                  |                                                                                                                                                                                                                                                                                                                            |                                                                                                                                                                                                                                                                                                                         |   |                           |   |                         |   |                           |   |                     |   |                          |
| 343 | <p>section_6_action_4_text</p> <p>Show the field ONLY if:<br/>[section_6_action_4_yes_no] = '1'</p> | <p>When reflecting on your ICU's ABCDEF bundle implementation efforts:</p>                                                                                                                                                                                                                                                 | <p>descriptive</p>                                                                                                                                                                                                                                                                                                      |   |                           |   |                         |   |                           |   |                     |   |                          |
| 344 | <p>section_6_action_4_a</p> <p>Show the field ONLY if:<br/>[section_6_action_4_yes_no] = '1'</p>    | <p>A. How helpful was facilitation for increasing bundle adoption?</p>                                                                                                                                                                                                                                                     | <p>radio, Required</p> <table border="1"> <tr><td>1</td><td>1 = Not at all helpful</td></tr> <tr><td>2</td><td>2 = Somewhat helpful</td></tr> <tr><td>3</td><td>3 = Moderately helpful</td></tr> <tr><td>4</td><td>4 = Very helpful</td></tr> <tr><td>5</td><td>5 = Extremely helpful</td></tr> </table>                | 1 | 1 = Not at all helpful    | 2 | 2 = Somewhat helpful    | 3 | 3 = Moderately helpful    | 4 | 4 = Very helpful    | 5 | 5 = Extremely helpful    |
| 1   | 1 = Not at all helpful                                                                              |                                                                                                                                                                                                                                                                                                                            |                                                                                                                                                                                                                                                                                                                         |   |                           |   |                         |   |                           |   |                     |   |                          |
| 2   | 2 = Somewhat helpful                                                                                |                                                                                                                                                                                                                                                                                                                            |                                                                                                                                                                                                                                                                                                                         |   |                           |   |                         |   |                           |   |                     |   |                          |
| 3   | 3 = Moderately helpful                                                                              |                                                                                                                                                                                                                                                                                                                            |                                                                                                                                                                                                                                                                                                                         |   |                           |   |                         |   |                           |   |                     |   |                          |
| 4   | 4 = Very helpful                                                                                    |                                                                                                                                                                                                                                                                                                                            |                                                                                                                                                                                                                                                                                                                         |   |                           |   |                         |   |                           |   |                     |   |                          |
| 5   | 5 = Extremely helpful                                                                               |                                                                                                                                                                                                                                                                                                                            |                                                                                                                                                                                                                                                                                                                         |   |                           |   |                         |   |                           |   |                     |   |                          |
| 345 | <p>section_6_action_4_b</p> <p>Show the field ONLY if:<br/>[section_6_action_4_yes_no] = '1'</p>    | <p>B. How acceptable was bundle-related facilitation among ICU team members?</p>                                                                                                                                                                                                                                           | <p>radio, Required</p> <table border="1"> <tr><td>1</td><td>1 = Not at all acceptable</td></tr> <tr><td>2</td><td>2 = Somewhat acceptable</td></tr> <tr><td>3</td><td>3 = Moderately acceptable</td></tr> <tr><td>4</td><td>4 = Very acceptable</td></tr> <tr><td>5</td><td>5 = Extremely acceptable</td></tr> </table> | 1 | 1 = Not at all acceptable | 2 | 2 = Somewhat acceptable | 3 | 3 = Moderately acceptable | 4 | 4 = Very acceptable | 5 | 5 = Extremely acceptable |
| 1   | 1 = Not at all acceptable                                                                           |                                                                                                                                                                                                                                                                                                                            |                                                                                                                                                                                                                                                                                                                         |   |                           |   |                         |   |                           |   |                     |   |                          |
| 2   | 2 = Somewhat acceptable                                                                             |                                                                                                                                                                                                                                                                                                                            |                                                                                                                                                                                                                                                                                                                         |   |                           |   |                         |   |                           |   |                     |   |                          |
| 3   | 3 = Moderately acceptable                                                                           |                                                                                                                                                                                                                                                                                                                            |                                                                                                                                                                                                                                                                                                                         |   |                           |   |                         |   |                           |   |                     |   |                          |
| 4   | 4 = Very acceptable                                                                                 |                                                                                                                                                                                                                                                                                                                            |                                                                                                                                                                                                                                                                                                                         |   |                           |   |                         |   |                           |   |                     |   |                          |
| 5   | 5 = Extremely acceptable                                                                            |                                                                                                                                                                                                                                                                                                                            |                                                                                                                                                                                                                                                                                                                         |   |                           |   |                         |   |                           |   |                     |   |                          |
| 346 | <p>section_6_action_4_c</p> <p>Show the field ONLY if:<br/>[section_6_action_4_yes_no] = '1'</p>    | <p>C. How feasible was it to use bundle-related facilitation?</p>                                                                                                                                                                                                                                                          | <p>radio, Required</p> <table border="1"> <tr><td>1</td><td>1 = Not at all feasible</td></tr> <tr><td>2</td><td>2 = Somewhat feasible</td></tr> <tr><td>3</td><td>3 = Moderately feasible</td></tr> <tr><td>4</td><td>4 = Very feasible</td></tr> <tr><td>5</td><td>5 = Extremely feasible</td></tr> </table>           | 1 | 1 = Not at all feasible   | 2 | 2 = Somewhat feasible   | 3 | 3 = Moderately feasible   | 4 | 4 = Very feasible   | 5 | 5 = Extremely feasible   |
| 1   | 1 = Not at all feasible                                                                             |                                                                                                                                                                                                                                                                                                                            |                                                                                                                                                                                                                                                                                                                         |   |                           |   |                         |   |                           |   |                     |   |                          |
| 2   | 2 = Somewhat feasible                                                                               |                                                                                                                                                                                                                                                                                                                            |                                                                                                                                                                                                                                                                                                                         |   |                           |   |                         |   |                           |   |                     |   |                          |
| 3   | 3 = Moderately feasible                                                                             |                                                                                                                                                                                                                                                                                                                            |                                                                                                                                                                                                                                                                                                                         |   |                           |   |                         |   |                           |   |                     |   |                          |
| 4   | 4 = Very feasible                                                                                   |                                                                                                                                                                                                                                                                                                                            |                                                                                                                                                                                                                                                                                                                         |   |                           |   |                         |   |                           |   |                     |   |                          |
| 5   | 5 = Extremely feasible                                                                              |                                                                                                                                                                                                                                                                                                                            |                                                                                                                                                                                                                                                                                                                         |   |                           |   |                         |   |                           |   |                     |   |                          |
| 347 | <p>section_6_action_4_d</p> <p>Show the field ONLY if:<br/>[section_6_action_4_yes_no] = '1'</p>    | <p>D. How costly (in terms of staff time, equipment, and other) was bundle-related facilitation?</p>                                                                                                                                                                                                                       | <p>radio, Required</p> <table border="1"> <tr><td>1</td><td>1 = Not at all costly</td></tr> <tr><td>2</td><td>2 = Somewhat costly</td></tr> <tr><td>3</td><td>3 = Moderately costly</td></tr> <tr><td>4</td><td>4 = Very costly</td></tr> <tr><td>5</td><td>5 = Extremely costly</td></tr> </table>                     | 1 | 1 = Not at all costly     | 2 | 2 = Somewhat costly     | 3 | 3 = Moderately costly     | 4 | 4 = Very costly     | 5 | 5 = Extremely costly     |
| 1   | 1 = Not at all costly                                                                               |                                                                                                                                                                                                                                                                                                                            |                                                                                                                                                                                                                                                                                                                         |   |                           |   |                         |   |                           |   |                     |   |                          |
| 2   | 2 = Somewhat costly                                                                                 |                                                                                                                                                                                                                                                                                                                            |                                                                                                                                                                                                                                                                                                                         |   |                           |   |                         |   |                           |   |                     |   |                          |
| 3   | 3 = Moderately costly                                                                               |                                                                                                                                                                                                                                                                                                                            |                                                                                                                                                                                                                                                                                                                         |   |                           |   |                         |   |                           |   |                     |   |                          |
| 4   | 4 = Very costly                                                                                     |                                                                                                                                                                                                                                                                                                                            |                                                                                                                                                                                                                                                                                                                         |   |                           |   |                         |   |                           |   |                     |   |                          |
| 5   | 5 = Extremely costly                                                                                |                                                                                                                                                                                                                                                                                                                            |                                                                                                                                                                                                                                                                                                                         |   |                           |   |                         |   |                           |   |                     |   |                          |
| 348 | <p>section_7_text</p>                                                                               | <p>Section Header:<br/>SECTION 7: ADAPT AND TAILOR CONTEXT (4 QUESTIONS)</p>                                                                                                                                                                                                                                               | <p>descriptive</p>                                                                                                                                                                                                                                                                                                      |   |                           |   |                         |   |                           |   |                     |   |                          |
| 349 | <p>section_7_action_1_yes_no</p>                                                                    | <p>Action 1: Use data experts</p> <p>Q: Did your institution involve, hire, and/or consult experts to inform management on the use of data generated by ABCDEF bundle implementation efforts?</p> <p>If action not used, mark "No" and go to next reflection question</p>                                                  | <p>yesno, Required</p> <table border="1"> <tr><td>1</td><td>Yes</td></tr> <tr><td>0</td><td>No</td></tr> </table> <p>Custom alignment: RH</p>                                                                                                                                                                           | 1 | Yes                       | 0 | No                      |   |                           |   |                     |   |                          |
| 1   | Yes                                                                                                 |                                                                                                                                                                                                                                                                                                                            |                                                                                                                                                                                                                                                                                                                         |   |                           |   |                         |   |                           |   |                     |   |                          |
| 0   | No                                                                                                  |                                                                                                                                                                                                                                                                                                                            |                                                                                                                                                                                                                                                                                                                         |   |                           |   |                         |   |                           |   |                     |   |                          |
| 350 | <p>section_7_action_1_text</p> <p>Show the field ONLY if:<br/>[section_7_action_1_yes_no] = '1'</p> | <p>When reflecting on your ICU's ABCDEF bundle implementation efforts:</p>                                                                                                                                                                                                                                                 | <p>descriptive</p>                                                                                                                                                                                                                                                                                                      |   |                           |   |                         |   |                           |   |                     |   |                          |



|     |                                                                                                     |                                                                                                                                                                                                                                                                                   |                                                                                                                                                                                                                                                                                                                         |   |                           |   |                         |   |                           |   |                     |   |                          |
|-----|-----------------------------------------------------------------------------------------------------|-----------------------------------------------------------------------------------------------------------------------------------------------------------------------------------------------------------------------------------------------------------------------------------|-------------------------------------------------------------------------------------------------------------------------------------------------------------------------------------------------------------------------------------------------------------------------------------------------------------------------|---|---------------------------|---|-------------------------|---|---------------------------|---|---------------------|---|--------------------------|
| 351 | <p>section_7_action_1_a</p> <p>Show the field ONLY if:<br/>[section_7_action_1_yes_no] = '1'</p>    | A. How helpful were data experts for increasing bundle adoption?                                                                                                                                                                                                                  | <p>radio, Required</p> <table border="1"> <tr><td>1</td><td>1 = Not at all helpful</td></tr> <tr><td>2</td><td>2 = Somewhat helpful</td></tr> <tr><td>3</td><td>3 = Moderately helpful</td></tr> <tr><td>4</td><td>4 = Very helpful</td></tr> <tr><td>5</td><td>5 = Extremely helpful</td></tr> </table>                | 1 | 1 = Not at all helpful    | 2 | 2 = Somewhat helpful    | 3 | 3 = Moderately helpful    | 4 | 4 = Very helpful    | 5 | 5 = Extremely helpful    |
| 1   | 1 = Not at all helpful                                                                              |                                                                                                                                                                                                                                                                                   |                                                                                                                                                                                                                                                                                                                         |   |                           |   |                         |   |                           |   |                     |   |                          |
| 2   | 2 = Somewhat helpful                                                                                |                                                                                                                                                                                                                                                                                   |                                                                                                                                                                                                                                                                                                                         |   |                           |   |                         |   |                           |   |                     |   |                          |
| 3   | 3 = Moderately helpful                                                                              |                                                                                                                                                                                                                                                                                   |                                                                                                                                                                                                                                                                                                                         |   |                           |   |                         |   |                           |   |                     |   |                          |
| 4   | 4 = Very helpful                                                                                    |                                                                                                                                                                                                                                                                                   |                                                                                                                                                                                                                                                                                                                         |   |                           |   |                         |   |                           |   |                     |   |                          |
| 5   | 5 = Extremely helpful                                                                               |                                                                                                                                                                                                                                                                                   |                                                                                                                                                                                                                                                                                                                         |   |                           |   |                         |   |                           |   |                     |   |                          |
| 352 | <p>section_7_action_1_b</p> <p>Show the field ONLY if:<br/>[section_7_action_1_yes_no] = '1'</p>    | B. How acceptable was using data experts for bundle-related implementation efforts among ICU team members?                                                                                                                                                                        | <p>radio, Required</p> <table border="1"> <tr><td>1</td><td>1 = Not at all acceptable</td></tr> <tr><td>2</td><td>2 = Somewhat acceptable</td></tr> <tr><td>3</td><td>3 = Moderately acceptable</td></tr> <tr><td>4</td><td>4 = Very acceptable</td></tr> <tr><td>5</td><td>5 = Extremely acceptable</td></tr> </table> | 1 | 1 = Not at all acceptable | 2 | 2 = Somewhat acceptable | 3 | 3 = Moderately acceptable | 4 | 4 = Very acceptable | 5 | 5 = Extremely acceptable |
| 1   | 1 = Not at all acceptable                                                                           |                                                                                                                                                                                                                                                                                   |                                                                                                                                                                                                                                                                                                                         |   |                           |   |                         |   |                           |   |                     |   |                          |
| 2   | 2 = Somewhat acceptable                                                                             |                                                                                                                                                                                                                                                                                   |                                                                                                                                                                                                                                                                                                                         |   |                           |   |                         |   |                           |   |                     |   |                          |
| 3   | 3 = Moderately acceptable                                                                           |                                                                                                                                                                                                                                                                                   |                                                                                                                                                                                                                                                                                                                         |   |                           |   |                         |   |                           |   |                     |   |                          |
| 4   | 4 = Very acceptable                                                                                 |                                                                                                                                                                                                                                                                                   |                                                                                                                                                                                                                                                                                                                         |   |                           |   |                         |   |                           |   |                     |   |                          |
| 5   | 5 = Extremely acceptable                                                                            |                                                                                                                                                                                                                                                                                   |                                                                                                                                                                                                                                                                                                                         |   |                           |   |                         |   |                           |   |                     |   |                          |
| 353 | <p>section_7_action_1_c</p> <p>Show the field ONLY if:<br/>[section_7_action_1_yes_no] = '1'</p>    | C. How feasible was it to use data experts for bundle-related implementation efforts?                                                                                                                                                                                             | <p>radio, Required</p> <table border="1"> <tr><td>1</td><td>1 = Not at all feasible</td></tr> <tr><td>2</td><td>2 = Somewhat feasible</td></tr> <tr><td>3</td><td>3 = Moderately feasible</td></tr> <tr><td>4</td><td>4 = Very feasible</td></tr> <tr><td>5</td><td>5 = Extremely feasible</td></tr> </table>           | 1 | 1 = Not at all feasible   | 2 | 2 = Somewhat feasible   | 3 | 3 = Moderately feasible   | 4 | 4 = Very feasible   | 5 | 5 = Extremely feasible   |
| 1   | 1 = Not at all feasible                                                                             |                                                                                                                                                                                                                                                                                   |                                                                                                                                                                                                                                                                                                                         |   |                           |   |                         |   |                           |   |                     |   |                          |
| 2   | 2 = Somewhat feasible                                                                               |                                                                                                                                                                                                                                                                                   |                                                                                                                                                                                                                                                                                                                         |   |                           |   |                         |   |                           |   |                     |   |                          |
| 3   | 3 = Moderately feasible                                                                             |                                                                                                                                                                                                                                                                                   |                                                                                                                                                                                                                                                                                                                         |   |                           |   |                         |   |                           |   |                     |   |                          |
| 4   | 4 = Very feasible                                                                                   |                                                                                                                                                                                                                                                                                   |                                                                                                                                                                                                                                                                                                                         |   |                           |   |                         |   |                           |   |                     |   |                          |
| 5   | 5 = Extremely feasible                                                                              |                                                                                                                                                                                                                                                                                   |                                                                                                                                                                                                                                                                                                                         |   |                           |   |                         |   |                           |   |                     |   |                          |
| 354 | <p>section_7_action_1_d</p> <p>Show the field ONLY if:<br/>[section_7_action_1_yes_no] = '1'</p>    | D. How costly (in terms of staff time, equipment, and other) was using data experts for bundle-related implementation efforts?                                                                                                                                                    | <p>radio, Required</p> <table border="1"> <tr><td>1</td><td>1 =Not at all costly</td></tr> <tr><td>2</td><td>2 = Somewhat costly</td></tr> <tr><td>3</td><td>3 = Moderately costly</td></tr> <tr><td>4</td><td>4 = Very costly</td></tr> <tr><td>5</td><td>5 = Extremely costly</td></tr> </table>                      | 1 | 1 =Not at all costly      | 2 | 2 = Somewhat costly     | 3 | 3 = Moderately costly     | 4 | 4 = Very costly     | 5 | 5 = Extremely costly     |
| 1   | 1 =Not at all costly                                                                                |                                                                                                                                                                                                                                                                                   |                                                                                                                                                                                                                                                                                                                         |   |                           |   |                         |   |                           |   |                     |   |                          |
| 2   | 2 = Somewhat costly                                                                                 |                                                                                                                                                                                                                                                                                   |                                                                                                                                                                                                                                                                                                                         |   |                           |   |                         |   |                           |   |                     |   |                          |
| 3   | 3 = Moderately costly                                                                               |                                                                                                                                                                                                                                                                                   |                                                                                                                                                                                                                                                                                                                         |   |                           |   |                         |   |                           |   |                     |   |                          |
| 4   | 4 = Very costly                                                                                     |                                                                                                                                                                                                                                                                                   |                                                                                                                                                                                                                                                                                                                         |   |                           |   |                         |   |                           |   |                     |   |                          |
| 5   | 5 = Extremely costly                                                                                |                                                                                                                                                                                                                                                                                   |                                                                                                                                                                                                                                                                                                                         |   |                           |   |                         |   |                           |   |                     |   |                          |
| 355 | <p>section_7_action_2_yes_no</p>                                                                    | <p>Action 2: Use data warehousing techniques</p> <p>Q: Did your institution integrate clinical records across facilities and organizations to facilitate ABCDEF bundle implementation across systems?</p> <p>If action not used, mark "No" and go to next reflection question</p> | <p>yesno, Required</p> <table border="1"> <tr><td>1</td><td>Yes</td></tr> <tr><td>0</td><td>No</td></tr> </table> <p>Custom alignment: RH</p>                                                                                                                                                                           | 1 | Yes                       | 0 | No                      |   |                           |   |                     |   |                          |
| 1   | Yes                                                                                                 |                                                                                                                                                                                                                                                                                   |                                                                                                                                                                                                                                                                                                                         |   |                           |   |                         |   |                           |   |                     |   |                          |
| 0   | No                                                                                                  |                                                                                                                                                                                                                                                                                   |                                                                                                                                                                                                                                                                                                                         |   |                           |   |                         |   |                           |   |                     |   |                          |
| 356 | <p>section_7_action_2_text</p> <p>Show the field ONLY if:<br/>[section_7_action_2_yes_no] = '1'</p> | When reflecting on your ICU's ABCDEF bundle implementation efforts:                                                                                                                                                                                                               | descriptive                                                                                                                                                                                                                                                                                                             |   |                           |   |                         |   |                           |   |                     |   |                          |
| 357 | <p>section_7_action_2_a</p> <p>Show the field ONLY if:<br/>[section_7_action_2_yes_no] = '1'</p>    | A. How helpful was using data warehousing techniques for increasing bundle adoption?                                                                                                                                                                                              | <p>radio, Required</p> <table border="1"> <tr><td>1</td><td>1 = Not at all helpful</td></tr> <tr><td>2</td><td>2 = Somewhat helpful</td></tr> <tr><td>3</td><td>3 = Moderately helpful</td></tr> <tr><td>4</td><td>4 = Very helpful</td></tr> <tr><td>5</td><td>5 = Extremely helpful</td></tr> </table>                | 1 | 1 = Not at all helpful    | 2 | 2 = Somewhat helpful    | 3 | 3 = Moderately helpful    | 4 | 4 = Very helpful    | 5 | 5 = Extremely helpful    |
| 1   | 1 = Not at all helpful                                                                              |                                                                                                                                                                                                                                                                                   |                                                                                                                                                                                                                                                                                                                         |   |                           |   |                         |   |                           |   |                     |   |                          |
| 2   | 2 = Somewhat helpful                                                                                |                                                                                                                                                                                                                                                                                   |                                                                                                                                                                                                                                                                                                                         |   |                           |   |                         |   |                           |   |                     |   |                          |
| 3   | 3 = Moderately helpful                                                                              |                                                                                                                                                                                                                                                                                   |                                                                                                                                                                                                                                                                                                                         |   |                           |   |                         |   |                           |   |                     |   |                          |
| 4   | 4 = Very helpful                                                                                    |                                                                                                                                                                                                                                                                                   |                                                                                                                                                                                                                                                                                                                         |   |                           |   |                         |   |                           |   |                     |   |                          |
| 5   | 5 = Extremely helpful                                                                               |                                                                                                                                                                                                                                                                                   |                                                                                                                                                                                                                                                                                                                         |   |                           |   |                         |   |                           |   |                     |   |                          |
| 358 | <p>section_7_action_2_b</p> <p>Show the field ONLY if:<br/>[section_7_action_2_yes_no] = '1'</p>    | B. How acceptable was using bundle-related data warehousing techniques among ICU team members?                                                                                                                                                                                    | <p>radio, Required</p> <table border="1"> <tr><td>1</td><td>1 = Not at all acceptable</td></tr> <tr><td>2</td><td>2 = Somewhat acceptable</td></tr> <tr><td>3</td><td>3 = Moderately acceptable</td></tr> <tr><td>4</td><td>4 = Very acceptable</td></tr> <tr><td>5</td><td>5 = Extremely acceptable</td></tr> </table> | 1 | 1 = Not at all acceptable | 2 | 2 = Somewhat acceptable | 3 | 3 = Moderately acceptable | 4 | 4 = Very acceptable | 5 | 5 = Extremely acceptable |
| 1   | 1 = Not at all acceptable                                                                           |                                                                                                                                                                                                                                                                                   |                                                                                                                                                                                                                                                                                                                         |   |                           |   |                         |   |                           |   |                     |   |                          |
| 2   | 2 = Somewhat acceptable                                                                             |                                                                                                                                                                                                                                                                                   |                                                                                                                                                                                                                                                                                                                         |   |                           |   |                         |   |                           |   |                     |   |                          |
| 3   | 3 = Moderately acceptable                                                                           |                                                                                                                                                                                                                                                                                   |                                                                                                                                                                                                                                                                                                                         |   |                           |   |                         |   |                           |   |                     |   |                          |
| 4   | 4 = Very acceptable                                                                                 |                                                                                                                                                                                                                                                                                   |                                                                                                                                                                                                                                                                                                                         |   |                           |   |                         |   |                           |   |                     |   |                          |
| 5   | 5 = Extremely acceptable                                                                            |                                                                                                                                                                                                                                                                                   |                                                                                                                                                                                                                                                                                                                         |   |                           |   |                         |   |                           |   |                     |   |                          |
| 359 | <p>section_7_action_2_c</p> <p>Show the field ONLY if:<br/>[section_7_action_2_yes_no] = '1'</p>    | C. How feasible was it to use bundle-related data warehousing techniques?                                                                                                                                                                                                         | <p>radio, Required</p> <table border="1"> <tr><td>1</td><td>1 = Not at all feasible</td></tr> <tr><td>2</td><td>2 = Somewhat feasible</td></tr> <tr><td>3</td><td>3 = Moderately feasible</td></tr> <tr><td>4</td><td>4 = Very feasible</td></tr> <tr><td>5</td><td>5 = Extremely feasible</td></tr> </table>           | 1 | 1 = Not at all feasible   | 2 | 2 = Somewhat feasible   | 3 | 3 = Moderately feasible   | 4 | 4 = Very feasible   | 5 | 5 = Extremely feasible   |
| 1   | 1 = Not at all feasible                                                                             |                                                                                                                                                                                                                                                                                   |                                                                                                                                                                                                                                                                                                                         |   |                           |   |                         |   |                           |   |                     |   |                          |
| 2   | 2 = Somewhat feasible                                                                               |                                                                                                                                                                                                                                                                                   |                                                                                                                                                                                                                                                                                                                         |   |                           |   |                         |   |                           |   |                     |   |                          |
| 3   | 3 = Moderately feasible                                                                             |                                                                                                                                                                                                                                                                                   |                                                                                                                                                                                                                                                                                                                         |   |                           |   |                         |   |                           |   |                     |   |                          |
| 4   | 4 = Very feasible                                                                                   |                                                                                                                                                                                                                                                                                   |                                                                                                                                                                                                                                                                                                                         |   |                           |   |                         |   |                           |   |                     |   |                          |
| 5   | 5 = Extremely feasible                                                                              |                                                                                                                                                                                                                                                                                   |                                                                                                                                                                                                                                                                                                                         |   |                           |   |                         |   |                           |   |                     |   |                          |

|     |                                                                                                     |                                                                                                                                                                                                                                                                                                        |                                                                                                                                                                                                                                                                                                                         |   |                           |   |                         |   |                           |   |                     |   |                          |
|-----|-----------------------------------------------------------------------------------------------------|--------------------------------------------------------------------------------------------------------------------------------------------------------------------------------------------------------------------------------------------------------------------------------------------------------|-------------------------------------------------------------------------------------------------------------------------------------------------------------------------------------------------------------------------------------------------------------------------------------------------------------------------|---|---------------------------|---|-------------------------|---|---------------------------|---|---------------------|---|--------------------------|
| 360 | <p>section_7_action_2_d</p> <p>Show the field ONLY if:<br/>[section_7_action_2_yes_no] = '1'</p>    | <p>D. How costly (in terms of staff time, equipment, and other) was using bundle-related data warehousing techniques?</p>                                                                                                                                                                              | <p>radio, Required</p> <table border="1"> <tr><td>1</td><td>1 = Not at all costly</td></tr> <tr><td>2</td><td>2 = Somewhat costly</td></tr> <tr><td>3</td><td>3 = Moderately costly</td></tr> <tr><td>4</td><td>4 = Very costly</td></tr> <tr><td>5</td><td>5 = Extremely costly</td></tr> </table>                     | 1 | 1 = Not at all costly     | 2 | 2 = Somewhat costly     | 3 | 3 = Moderately costly     | 4 | 4 = Very costly     | 5 | 5 = Extremely costly     |
| 1   | 1 = Not at all costly                                                                               |                                                                                                                                                                                                                                                                                                        |                                                                                                                                                                                                                                                                                                                         |   |                           |   |                         |   |                           |   |                     |   |                          |
| 2   | 2 = Somewhat costly                                                                                 |                                                                                                                                                                                                                                                                                                        |                                                                                                                                                                                                                                                                                                                         |   |                           |   |                         |   |                           |   |                     |   |                          |
| 3   | 3 = Moderately costly                                                                               |                                                                                                                                                                                                                                                                                                        |                                                                                                                                                                                                                                                                                                                         |   |                           |   |                         |   |                           |   |                     |   |                          |
| 4   | 4 = Very costly                                                                                     |                                                                                                                                                                                                                                                                                                        |                                                                                                                                                                                                                                                                                                                         |   |                           |   |                         |   |                           |   |                     |   |                          |
| 5   | 5 = Extremely costly                                                                                |                                                                                                                                                                                                                                                                                                        |                                                                                                                                                                                                                                                                                                                         |   |                           |   |                         |   |                           |   |                     |   |                          |
| 361 | <p>section_7_action_3_yes_no</p>                                                                    | <p>Action 3: Tailor strategies</p> <p>Q: Did your institution tailor ABCDEF bundle implementation strategies to address barriers and leverage facilitators that were identified through earlier data collection?</p> <p>If action not used, mark "No" and go to next reflection question</p>           | <p>yesno, Required</p> <table border="1"> <tr><td>1</td><td>Yes</td></tr> <tr><td>0</td><td>No</td></tr> </table> <p>Custom alignment: RH</p>                                                                                                                                                                           | 1 | Yes                       | 0 | No                      |   |                           |   |                     |   |                          |
| 1   | Yes                                                                                                 |                                                                                                                                                                                                                                                                                                        |                                                                                                                                                                                                                                                                                                                         |   |                           |   |                         |   |                           |   |                     |   |                          |
| 0   | No                                                                                                  |                                                                                                                                                                                                                                                                                                        |                                                                                                                                                                                                                                                                                                                         |   |                           |   |                         |   |                           |   |                     |   |                          |
| 362 | <p>section_7_action_3_text</p> <p>Show the field ONLY if:<br/>[section_7_action_3_yes_no] = '1'</p> | <p>When reflecting on your ICU's ABCDEF bundle implementation efforts:</p>                                                                                                                                                                                                                             | <p>descriptive</p>                                                                                                                                                                                                                                                                                                      |   |                           |   |                         |   |                           |   |                     |   |                          |
| 363 | <p>section_7_action_3_a</p> <p>Show the field ONLY if:<br/>[section_7_action_3_yes_no] = '1'</p>    | <p>A. How helpful was tailoring implementation strategies for increasing bundle adoption?</p>                                                                                                                                                                                                          | <p>radio, Required</p> <table border="1"> <tr><td>1</td><td>1 = Not at all helpful</td></tr> <tr><td>2</td><td>2 = Somewhat helpful</td></tr> <tr><td>3</td><td>3 = Moderately helpful</td></tr> <tr><td>4</td><td>4 = Very helpful</td></tr> <tr><td>5</td><td>5 = Extremely helpful</td></tr> </table>                | 1 | 1 = Not at all helpful    | 2 | 2 = Somewhat helpful    | 3 | 3 = Moderately helpful    | 4 | 4 = Very helpful    | 5 | 5 = Extremely helpful    |
| 1   | 1 = Not at all helpful                                                                              |                                                                                                                                                                                                                                                                                                        |                                                                                                                                                                                                                                                                                                                         |   |                           |   |                         |   |                           |   |                     |   |                          |
| 2   | 2 = Somewhat helpful                                                                                |                                                                                                                                                                                                                                                                                                        |                                                                                                                                                                                                                                                                                                                         |   |                           |   |                         |   |                           |   |                     |   |                          |
| 3   | 3 = Moderately helpful                                                                              |                                                                                                                                                                                                                                                                                                        |                                                                                                                                                                                                                                                                                                                         |   |                           |   |                         |   |                           |   |                     |   |                          |
| 4   | 4 = Very helpful                                                                                    |                                                                                                                                                                                                                                                                                                        |                                                                                                                                                                                                                                                                                                                         |   |                           |   |                         |   |                           |   |                     |   |                          |
| 5   | 5 = Extremely helpful                                                                               |                                                                                                                                                                                                                                                                                                        |                                                                                                                                                                                                                                                                                                                         |   |                           |   |                         |   |                           |   |                     |   |                          |
| 364 | <p>section_7_action_3_b</p> <p>Show the field ONLY if:<br/>[section_7_action_3_yes_no] = '1'</p>    | <p>B. How acceptable was tailoring bundle implementation strategies among ICU team members?</p>                                                                                                                                                                                                        | <p>radio, Required</p> <table border="1"> <tr><td>1</td><td>1 = Not at all acceptable</td></tr> <tr><td>2</td><td>2 = Somewhat acceptable</td></tr> <tr><td>3</td><td>3 = Moderately acceptable</td></tr> <tr><td>4</td><td>4 = Very acceptable</td></tr> <tr><td>5</td><td>5 = Extremely acceptable</td></tr> </table> | 1 | 1 = Not at all acceptable | 2 | 2 = Somewhat acceptable | 3 | 3 = Moderately acceptable | 4 | 4 = Very acceptable | 5 | 5 = Extremely acceptable |
| 1   | 1 = Not at all acceptable                                                                           |                                                                                                                                                                                                                                                                                                        |                                                                                                                                                                                                                                                                                                                         |   |                           |   |                         |   |                           |   |                     |   |                          |
| 2   | 2 = Somewhat acceptable                                                                             |                                                                                                                                                                                                                                                                                                        |                                                                                                                                                                                                                                                                                                                         |   |                           |   |                         |   |                           |   |                     |   |                          |
| 3   | 3 = Moderately acceptable                                                                           |                                                                                                                                                                                                                                                                                                        |                                                                                                                                                                                                                                                                                                                         |   |                           |   |                         |   |                           |   |                     |   |                          |
| 4   | 4 = Very acceptable                                                                                 |                                                                                                                                                                                                                                                                                                        |                                                                                                                                                                                                                                                                                                                         |   |                           |   |                         |   |                           |   |                     |   |                          |
| 5   | 5 = Extremely acceptable                                                                            |                                                                                                                                                                                                                                                                                                        |                                                                                                                                                                                                                                                                                                                         |   |                           |   |                         |   |                           |   |                     |   |                          |
| 365 | <p>section_7_action_3_c</p> <p>Show the field ONLY if:<br/>[section_7_action_3_yes_no] = '1'</p>    | <p>C. How feasible was it to tailor bundle implementation strategies?</p>                                                                                                                                                                                                                              | <p>radio, Required</p> <table border="1"> <tr><td>1</td><td>1 = Not at all feasible</td></tr> <tr><td>2</td><td>2 = Somewhat feasible</td></tr> <tr><td>3</td><td>3 = Moderately feasible</td></tr> <tr><td>4</td><td>4 = Very feasible</td></tr> <tr><td>5</td><td>5 = Extremely feasible</td></tr> </table>           | 1 | 1 = Not at all feasible   | 2 | 2 = Somewhat feasible   | 3 | 3 = Moderately feasible   | 4 | 4 = Very feasible   | 5 | 5 = Extremely feasible   |
| 1   | 1 = Not at all feasible                                                                             |                                                                                                                                                                                                                                                                                                        |                                                                                                                                                                                                                                                                                                                         |   |                           |   |                         |   |                           |   |                     |   |                          |
| 2   | 2 = Somewhat feasible                                                                               |                                                                                                                                                                                                                                                                                                        |                                                                                                                                                                                                                                                                                                                         |   |                           |   |                         |   |                           |   |                     |   |                          |
| 3   | 3 = Moderately feasible                                                                             |                                                                                                                                                                                                                                                                                                        |                                                                                                                                                                                                                                                                                                                         |   |                           |   |                         |   |                           |   |                     |   |                          |
| 4   | 4 = Very feasible                                                                                   |                                                                                                                                                                                                                                                                                                        |                                                                                                                                                                                                                                                                                                                         |   |                           |   |                         |   |                           |   |                     |   |                          |
| 5   | 5 = Extremely feasible                                                                              |                                                                                                                                                                                                                                                                                                        |                                                                                                                                                                                                                                                                                                                         |   |                           |   |                         |   |                           |   |                     |   |                          |
| 366 | <p>section_7_action_3_d</p> <p>Show the field ONLY if:<br/>[section_7_action_3_yes_no] = '1'</p>    | <p>D. How costly (in terms of staff time, equipment, and other) was tailoring bundle implementation strategies?</p>                                                                                                                                                                                    | <p>radio, Required</p> <table border="1"> <tr><td>1</td><td>1 = Not at all costly</td></tr> <tr><td>2</td><td>2 = Somewhat costly</td></tr> <tr><td>3</td><td>3 = Moderately costly</td></tr> <tr><td>4</td><td>4 = Very costly</td></tr> <tr><td>5</td><td>5 = Extremely costly</td></tr> </table>                     | 1 | 1 = Not at all costly     | 2 | 2 = Somewhat costly     | 3 | 3 = Moderately costly     | 4 | 4 = Very costly     | 5 | 5 = Extremely costly     |
| 1   | 1 = Not at all costly                                                                               |                                                                                                                                                                                                                                                                                                        |                                                                                                                                                                                                                                                                                                                         |   |                           |   |                         |   |                           |   |                     |   |                          |
| 2   | 2 = Somewhat costly                                                                                 |                                                                                                                                                                                                                                                                                                        |                                                                                                                                                                                                                                                                                                                         |   |                           |   |                         |   |                           |   |                     |   |                          |
| 3   | 3 = Moderately costly                                                                               |                                                                                                                                                                                                                                                                                                        |                                                                                                                                                                                                                                                                                                                         |   |                           |   |                         |   |                           |   |                     |   |                          |
| 4   | 4 = Very costly                                                                                     |                                                                                                                                                                                                                                                                                                        |                                                                                                                                                                                                                                                                                                                         |   |                           |   |                         |   |                           |   |                     |   |                          |
| 5   | 5 = Extremely costly                                                                                |                                                                                                                                                                                                                                                                                                        |                                                                                                                                                                                                                                                                                                                         |   |                           |   |                         |   |                           |   |                     |   |                          |
| 367 | <p>section_7_action_4_yes_no</p>                                                                    | <p>Action 4: Promote adaptability</p> <p>Q: Did your institution identify the ways the ABCDEF bundle can be tailored to meet local needs and clarify which elements of the bundle must be maintained to preserve fidelity?</p> <p>If action not used, mark "No" and go to next reflection question</p> | <p>yesno, Required</p> <table border="1"> <tr><td>1</td><td>Yes</td></tr> <tr><td>0</td><td>No</td></tr> </table> <p>Custom alignment: RH</p>                                                                                                                                                                           | 1 | Yes                       | 0 | No                      |   |                           |   |                     |   |                          |
| 1   | Yes                                                                                                 |                                                                                                                                                                                                                                                                                                        |                                                                                                                                                                                                                                                                                                                         |   |                           |   |                         |   |                           |   |                     |   |                          |
| 0   | No                                                                                                  |                                                                                                                                                                                                                                                                                                        |                                                                                                                                                                                                                                                                                                                         |   |                           |   |                         |   |                           |   |                     |   |                          |
| 368 | <p>section_7_action_4_text</p> <p>Show the field ONLY if:<br/>[section_7_action_4_yes_no] = '1'</p> | <p>When reflecting on your ICU's ABCDEF bundle implementation efforts:</p>                                                                                                                                                                                                                             | <p>descriptive</p>                                                                                                                                                                                                                                                                                                      |   |                           |   |                         |   |                           |   |                     |   |                          |

|     |                                                                                                     |                                                                                                                                                                                                                                                                                                                                             |                                                                                                                                                                                                                                                                                                                         |   |                           |   |                         |   |                           |   |                     |   |                          |
|-----|-----------------------------------------------------------------------------------------------------|---------------------------------------------------------------------------------------------------------------------------------------------------------------------------------------------------------------------------------------------------------------------------------------------------------------------------------------------|-------------------------------------------------------------------------------------------------------------------------------------------------------------------------------------------------------------------------------------------------------------------------------------------------------------------------|---|---------------------------|---|-------------------------|---|---------------------------|---|---------------------|---|--------------------------|
| 369 | <p>section_7_action_4_a</p> <p>Show the field ONLY if:<br/>[section_7_action_4_yes_no] = '1'</p>    | A. How helpful was promoting adaptability for increasing bundle adoption?                                                                                                                                                                                                                                                                   | <p>radio, Required</p> <table border="1"> <tr><td>1</td><td>1 = Not at all helpful</td></tr> <tr><td>2</td><td>2 = Somewhat helpful</td></tr> <tr><td>3</td><td>3 = Moderately helpful</td></tr> <tr><td>4</td><td>4 = Very helpful</td></tr> <tr><td>5</td><td>5 = Extremely helpful</td></tr> </table>                | 1 | 1 = Not at all helpful    | 2 | 2 = Somewhat helpful    | 3 | 3 = Moderately helpful    | 4 | 4 = Very helpful    | 5 | 5 = Extremely helpful    |
| 1   | 1 = Not at all helpful                                                                              |                                                                                                                                                                                                                                                                                                                                             |                                                                                                                                                                                                                                                                                                                         |   |                           |   |                         |   |                           |   |                     |   |                          |
| 2   | 2 = Somewhat helpful                                                                                |                                                                                                                                                                                                                                                                                                                                             |                                                                                                                                                                                                                                                                                                                         |   |                           |   |                         |   |                           |   |                     |   |                          |
| 3   | 3 = Moderately helpful                                                                              |                                                                                                                                                                                                                                                                                                                                             |                                                                                                                                                                                                                                                                                                                         |   |                           |   |                         |   |                           |   |                     |   |                          |
| 4   | 4 = Very helpful                                                                                    |                                                                                                                                                                                                                                                                                                                                             |                                                                                                                                                                                                                                                                                                                         |   |                           |   |                         |   |                           |   |                     |   |                          |
| 5   | 5 = Extremely helpful                                                                               |                                                                                                                                                                                                                                                                                                                                             |                                                                                                                                                                                                                                                                                                                         |   |                           |   |                         |   |                           |   |                     |   |                          |
| 370 | <p>section_7_action_4_b</p> <p>Show the field ONLY if:<br/>[section_7_action_4_yes_no] = '1'</p>    | B. How acceptable was promoting bundle adaptability among ICU team members?                                                                                                                                                                                                                                                                 | <p>radio, Required</p> <table border="1"> <tr><td>1</td><td>1 = Not at all acceptable</td></tr> <tr><td>2</td><td>2 = Somewhat acceptable</td></tr> <tr><td>3</td><td>3 = Moderately acceptable</td></tr> <tr><td>4</td><td>4 = Very acceptable</td></tr> <tr><td>5</td><td>5 = Extremely acceptable</td></tr> </table> | 1 | 1 = Not at all acceptable | 2 | 2 = Somewhat acceptable | 3 | 3 = Moderately acceptable | 4 | 4 = Very acceptable | 5 | 5 = Extremely acceptable |
| 1   | 1 = Not at all acceptable                                                                           |                                                                                                                                                                                                                                                                                                                                             |                                                                                                                                                                                                                                                                                                                         |   |                           |   |                         |   |                           |   |                     |   |                          |
| 2   | 2 = Somewhat acceptable                                                                             |                                                                                                                                                                                                                                                                                                                                             |                                                                                                                                                                                                                                                                                                                         |   |                           |   |                         |   |                           |   |                     |   |                          |
| 3   | 3 = Moderately acceptable                                                                           |                                                                                                                                                                                                                                                                                                                                             |                                                                                                                                                                                                                                                                                                                         |   |                           |   |                         |   |                           |   |                     |   |                          |
| 4   | 4 = Very acceptable                                                                                 |                                                                                                                                                                                                                                                                                                                                             |                                                                                                                                                                                                                                                                                                                         |   |                           |   |                         |   |                           |   |                     |   |                          |
| 5   | 5 = Extremely acceptable                                                                            |                                                                                                                                                                                                                                                                                                                                             |                                                                                                                                                                                                                                                                                                                         |   |                           |   |                         |   |                           |   |                     |   |                          |
| 371 | <p>section_7_action_4_c</p> <p>Show the field ONLY if:<br/>[section_7_action_4_yes_no] = '1'</p>    | C. How feasible was it to promote bundle adaptability?                                                                                                                                                                                                                                                                                      | <p>radio, Required</p> <table border="1"> <tr><td>1</td><td>1 = Not at all feasible</td></tr> <tr><td>2</td><td>2 = Somewhat feasible</td></tr> <tr><td>3</td><td>3 = Moderately feasible</td></tr> <tr><td>4</td><td>4 = Very feasible</td></tr> <tr><td>5</td><td>5 = Extremely feasible</td></tr> </table>           | 1 | 1 = Not at all feasible   | 2 | 2 = Somewhat feasible   | 3 | 3 = Moderately feasible   | 4 | 4 = Very feasible   | 5 | 5 = Extremely feasible   |
| 1   | 1 = Not at all feasible                                                                             |                                                                                                                                                                                                                                                                                                                                             |                                                                                                                                                                                                                                                                                                                         |   |                           |   |                         |   |                           |   |                     |   |                          |
| 2   | 2 = Somewhat feasible                                                                               |                                                                                                                                                                                                                                                                                                                                             |                                                                                                                                                                                                                                                                                                                         |   |                           |   |                         |   |                           |   |                     |   |                          |
| 3   | 3 = Moderately feasible                                                                             |                                                                                                                                                                                                                                                                                                                                             |                                                                                                                                                                                                                                                                                                                         |   |                           |   |                         |   |                           |   |                     |   |                          |
| 4   | 4 = Very feasible                                                                                   |                                                                                                                                                                                                                                                                                                                                             |                                                                                                                                                                                                                                                                                                                         |   |                           |   |                         |   |                           |   |                     |   |                          |
| 5   | 5 = Extremely feasible                                                                              |                                                                                                                                                                                                                                                                                                                                             |                                                                                                                                                                                                                                                                                                                         |   |                           |   |                         |   |                           |   |                     |   |                          |
| 372 | <p>section_7_action_4_d</p> <p>Show the field ONLY if:<br/>[section_7_action_4_yes_no] = '1'</p>    | D. How costly (in terms of staff time, equipment, and other) was promoting bundle adaptability?                                                                                                                                                                                                                                             | <p>radio, Required</p> <table border="1"> <tr><td>1</td><td>1 =Not at all costly</td></tr> <tr><td>2</td><td>2 = Somewhat costly</td></tr> <tr><td>3</td><td>3 = Moderately costly</td></tr> <tr><td>4</td><td>4 = Very costly</td></tr> <tr><td>5</td><td>5 = Extremely costly</td></tr> </table>                      | 1 | 1 =Not at all costly      | 2 | 2 = Somewhat costly     | 3 | 3 = Moderately costly     | 4 | 4 = Very costly     | 5 | 5 = Extremely costly     |
| 1   | 1 =Not at all costly                                                                                |                                                                                                                                                                                                                                                                                                                                             |                                                                                                                                                                                                                                                                                                                         |   |                           |   |                         |   |                           |   |                     |   |                          |
| 2   | 2 = Somewhat costly                                                                                 |                                                                                                                                                                                                                                                                                                                                             |                                                                                                                                                                                                                                                                                                                         |   |                           |   |                         |   |                           |   |                     |   |                          |
| 3   | 3 = Moderately costly                                                                               |                                                                                                                                                                                                                                                                                                                                             |                                                                                                                                                                                                                                                                                                                         |   |                           |   |                         |   |                           |   |                     |   |                          |
| 4   | 4 = Very costly                                                                                     |                                                                                                                                                                                                                                                                                                                                             |                                                                                                                                                                                                                                                                                                                         |   |                           |   |                         |   |                           |   |                     |   |                          |
| 5   | 5 = Extremely costly                                                                                |                                                                                                                                                                                                                                                                                                                                             |                                                                                                                                                                                                                                                                                                                         |   |                           |   |                         |   |                           |   |                     |   |                          |
| 373 | section_8_text                                                                                      | <p>Section Header:</p> <p>SECTION 8: SUPPORT CLINICIANS (5 QUESTIONS)</p>                                                                                                                                                                                                                                                                   | descriptive                                                                                                                                                                                                                                                                                                             |   |                           |   |                         |   |                           |   |                     |   |                          |
| 374 | section_8_action_1_yes_no                                                                           | <p>Action 1: Create new clinical teams</p> <p>Q: Did your institution change who serves on the clinical team, adding different disciplines and different skills to make it more likely that the ABCDEF bundle is delivered (or is more successfully delivered)?</p> <p>If action not used, mark "No" and go to next reflection question</p> | <p>yesno, Required</p> <table border="1"> <tr><td>1</td><td>Yes</td></tr> <tr><td>0</td><td>No</td></tr> </table> <p>Custom alignment: RH</p>                                                                                                                                                                           | 1 | Yes                       | 0 | No                      |   |                           |   |                     |   |                          |
| 1   | Yes                                                                                                 |                                                                                                                                                                                                                                                                                                                                             |                                                                                                                                                                                                                                                                                                                         |   |                           |   |                         |   |                           |   |                     |   |                          |
| 0   | No                                                                                                  |                                                                                                                                                                                                                                                                                                                                             |                                                                                                                                                                                                                                                                                                                         |   |                           |   |                         |   |                           |   |                     |   |                          |
| 375 | <p>section_8_action_1_text</p> <p>Show the field ONLY if:<br/>[section_8_action_1_yes_no] = '1'</p> | When reflecting on your ICU's ABCDEF bundle implementation efforts:                                                                                                                                                                                                                                                                         | descriptive                                                                                                                                                                                                                                                                                                             |   |                           |   |                         |   |                           |   |                     |   |                          |
| 376 | <p>section_8_action_1_a</p> <p>Show the field ONLY if:<br/>[section_8_action_1_yes_no] = '1'</p>    | A. How helpful was creating new clinical teams for increasing bundle adoption?                                                                                                                                                                                                                                                              | <p>radio, Required</p> <table border="1"> <tr><td>1</td><td>1 = Not at all helpful</td></tr> <tr><td>2</td><td>2 = Somewhat helpful</td></tr> <tr><td>3</td><td>3 = Moderately helpful</td></tr> <tr><td>4</td><td>4 = Very helpful</td></tr> <tr><td>5</td><td>5 = Extremely helpful</td></tr> </table>                | 1 | 1 = Not at all helpful    | 2 | 2 = Somewhat helpful    | 3 | 3 = Moderately helpful    | 4 | 4 = Very helpful    | 5 | 5 = Extremely helpful    |
| 1   | 1 = Not at all helpful                                                                              |                                                                                                                                                                                                                                                                                                                                             |                                                                                                                                                                                                                                                                                                                         |   |                           |   |                         |   |                           |   |                     |   |                          |
| 2   | 2 = Somewhat helpful                                                                                |                                                                                                                                                                                                                                                                                                                                             |                                                                                                                                                                                                                                                                                                                         |   |                           |   |                         |   |                           |   |                     |   |                          |
| 3   | 3 = Moderately helpful                                                                              |                                                                                                                                                                                                                                                                                                                                             |                                                                                                                                                                                                                                                                                                                         |   |                           |   |                         |   |                           |   |                     |   |                          |
| 4   | 4 = Very helpful                                                                                    |                                                                                                                                                                                                                                                                                                                                             |                                                                                                                                                                                                                                                                                                                         |   |                           |   |                         |   |                           |   |                     |   |                          |
| 5   | 5 = Extremely helpful                                                                               |                                                                                                                                                                                                                                                                                                                                             |                                                                                                                                                                                                                                                                                                                         |   |                           |   |                         |   |                           |   |                     |   |                          |
| 377 | <p>section_8_action_1_b</p> <p>Show the field ONLY if:<br/>[section_8_action_1_yes_no] = '1'</p>    | B. How acceptable was creating new bundle-related clinical teams among ICU team members?                                                                                                                                                                                                                                                    | <p>radio, Required</p> <table border="1"> <tr><td>1</td><td>1 = Not at all acceptable</td></tr> <tr><td>2</td><td>2 = Somewhat acceptable</td></tr> <tr><td>3</td><td>3 = Moderately acceptable</td></tr> <tr><td>4</td><td>4 = Very acceptable</td></tr> <tr><td>5</td><td>5 = Extremely acceptable</td></tr> </table> | 1 | 1 = Not at all acceptable | 2 | 2 = Somewhat acceptable | 3 | 3 = Moderately acceptable | 4 | 4 = Very acceptable | 5 | 5 = Extremely acceptable |
| 1   | 1 = Not at all acceptable                                                                           |                                                                                                                                                                                                                                                                                                                                             |                                                                                                                                                                                                                                                                                                                         |   |                           |   |                         |   |                           |   |                     |   |                          |
| 2   | 2 = Somewhat acceptable                                                                             |                                                                                                                                                                                                                                                                                                                                             |                                                                                                                                                                                                                                                                                                                         |   |                           |   |                         |   |                           |   |                     |   |                          |
| 3   | 3 = Moderately acceptable                                                                           |                                                                                                                                                                                                                                                                                                                                             |                                                                                                                                                                                                                                                                                                                         |   |                           |   |                         |   |                           |   |                     |   |                          |
| 4   | 4 = Very acceptable                                                                                 |                                                                                                                                                                                                                                                                                                                                             |                                                                                                                                                                                                                                                                                                                         |   |                           |   |                         |   |                           |   |                     |   |                          |
| 5   | 5 = Extremely acceptable                                                                            |                                                                                                                                                                                                                                                                                                                                             |                                                                                                                                                                                                                                                                                                                         |   |                           |   |                         |   |                           |   |                     |   |                          |

|     |                                                                                                     |                                                                                                                                                                                                                                                                                                                                                                |                                                                                                                                                                                                                                                                                                                         |   |                           |   |                         |   |                           |   |                     |   |                          |
|-----|-----------------------------------------------------------------------------------------------------|----------------------------------------------------------------------------------------------------------------------------------------------------------------------------------------------------------------------------------------------------------------------------------------------------------------------------------------------------------------|-------------------------------------------------------------------------------------------------------------------------------------------------------------------------------------------------------------------------------------------------------------------------------------------------------------------------|---|---------------------------|---|-------------------------|---|---------------------------|---|---------------------|---|--------------------------|
| 378 | <p>section_8_action_1_c</p> <p>Show the field ONLY if:<br/>[section_8_action_1_yes_no] = '1'</p>    | <p>C. How feasible was it to create new bundle-related clinical teams?</p>                                                                                                                                                                                                                                                                                     | <p>radio, Required</p> <table border="1"> <tr><td>1</td><td>1 = Not at all feasible</td></tr> <tr><td>2</td><td>2 = Somewhat feasible</td></tr> <tr><td>3</td><td>3 = Moderately feasible</td></tr> <tr><td>4</td><td>4 = Very feasible</td></tr> <tr><td>5</td><td>5 = Extremely feasible</td></tr> </table>           | 1 | 1 = Not at all feasible   | 2 | 2 = Somewhat feasible   | 3 | 3 = Moderately feasible   | 4 | 4 = Very feasible   | 5 | 5 = Extremely feasible   |
| 1   | 1 = Not at all feasible                                                                             |                                                                                                                                                                                                                                                                                                                                                                |                                                                                                                                                                                                                                                                                                                         |   |                           |   |                         |   |                           |   |                     |   |                          |
| 2   | 2 = Somewhat feasible                                                                               |                                                                                                                                                                                                                                                                                                                                                                |                                                                                                                                                                                                                                                                                                                         |   |                           |   |                         |   |                           |   |                     |   |                          |
| 3   | 3 = Moderately feasible                                                                             |                                                                                                                                                                                                                                                                                                                                                                |                                                                                                                                                                                                                                                                                                                         |   |                           |   |                         |   |                           |   |                     |   |                          |
| 4   | 4 = Very feasible                                                                                   |                                                                                                                                                                                                                                                                                                                                                                |                                                                                                                                                                                                                                                                                                                         |   |                           |   |                         |   |                           |   |                     |   |                          |
| 5   | 5 = Extremely feasible                                                                              |                                                                                                                                                                                                                                                                                                                                                                |                                                                                                                                                                                                                                                                                                                         |   |                           |   |                         |   |                           |   |                     |   |                          |
| 379 | <p>section_8_action_1_d</p> <p>Show the field ONLY if:<br/>[section_8_action_1_yes_no] = '1'</p>    | <p>D. How costly (in terms of staff time, equipment, and other) was creating new bundle-related clinical teams?</p>                                                                                                                                                                                                                                            | <p>radio, Required</p> <table border="1"> <tr><td>1</td><td>1 =Not at all costly</td></tr> <tr><td>2</td><td>2 = Somewhat costly</td></tr> <tr><td>3</td><td>3 = Moderately costly</td></tr> <tr><td>4</td><td>4 = Very costly</td></tr> <tr><td>5</td><td>5 = Extremely costly</td></tr> </table>                      | 1 | 1 =Not at all costly      | 2 | 2 = Somewhat costly     | 3 | 3 = Moderately costly     | 4 | 4 = Very costly     | 5 | 5 = Extremely costly     |
| 1   | 1 =Not at all costly                                                                                |                                                                                                                                                                                                                                                                                                                                                                |                                                                                                                                                                                                                                                                                                                         |   |                           |   |                         |   |                           |   |                     |   |                          |
| 2   | 2 = Somewhat costly                                                                                 |                                                                                                                                                                                                                                                                                                                                                                |                                                                                                                                                                                                                                                                                                                         |   |                           |   |                         |   |                           |   |                     |   |                          |
| 3   | 3 = Moderately costly                                                                               |                                                                                                                                                                                                                                                                                                                                                                |                                                                                                                                                                                                                                                                                                                         |   |                           |   |                         |   |                           |   |                     |   |                          |
| 4   | 4 = Very costly                                                                                     |                                                                                                                                                                                                                                                                                                                                                                |                                                                                                                                                                                                                                                                                                                         |   |                           |   |                         |   |                           |   |                     |   |                          |
| 5   | 5 = Extremely costly                                                                                |                                                                                                                                                                                                                                                                                                                                                                |                                                                                                                                                                                                                                                                                                                         |   |                           |   |                         |   |                           |   |                     |   |                          |
| 380 | <p>section_8_action_2_yes_no</p>                                                                    | <p>Action 2: Remind clinicians</p> <p>Q: Did your institution develop reminder systems designed to help clinicians to recall information and/or prompt them to use the ABCDEF bundle?</p> <p>If action not used, mark "No" and go to next reflection question</p>                                                                                              | <p>yesno, Required</p> <table border="1"> <tr><td>1</td><td>Yes</td></tr> <tr><td>0</td><td>No</td></tr> </table> <p>Custom alignment: RH</p>                                                                                                                                                                           | 1 | Yes                       | 0 | No                      |   |                           |   |                     |   |                          |
| 1   | Yes                                                                                                 |                                                                                                                                                                                                                                                                                                                                                                |                                                                                                                                                                                                                                                                                                                         |   |                           |   |                         |   |                           |   |                     |   |                          |
| 0   | No                                                                                                  |                                                                                                                                                                                                                                                                                                                                                                |                                                                                                                                                                                                                                                                                                                         |   |                           |   |                         |   |                           |   |                     |   |                          |
| 381 | <p>section_8_action_2_text</p> <p>Show the field ONLY if:<br/>[section_8_action_2_yes_no] = '1'</p> | <p>When reflecting on your ICU's ABCDEF bundle implementation efforts:</p>                                                                                                                                                                                                                                                                                     | <p>descriptive</p>                                                                                                                                                                                                                                                                                                      |   |                           |   |                         |   |                           |   |                     |   |                          |
| 382 | <p>section_8_action_2_a</p> <p>Show the field ONLY if:<br/>[section_8_action_2_yes_no] = '1'</p>    | <p>A. How helpful was reminding clinicians for increasing bundle adoption?</p>                                                                                                                                                                                                                                                                                 | <p>radio, Required</p> <table border="1"> <tr><td>1</td><td>1 = Not at all helpful</td></tr> <tr><td>2</td><td>2 = Somewhat helpful</td></tr> <tr><td>3</td><td>3 = Moderately helpful</td></tr> <tr><td>4</td><td>4 = Very helpful</td></tr> <tr><td>5</td><td>5 = Extremely helpful</td></tr> </table>                | 1 | 1 = Not at all helpful    | 2 | 2 = Somewhat helpful    | 3 | 3 = Moderately helpful    | 4 | 4 = Very helpful    | 5 | 5 = Extremely helpful    |
| 1   | 1 = Not at all helpful                                                                              |                                                                                                                                                                                                                                                                                                                                                                |                                                                                                                                                                                                                                                                                                                         |   |                           |   |                         |   |                           |   |                     |   |                          |
| 2   | 2 = Somewhat helpful                                                                                |                                                                                                                                                                                                                                                                                                                                                                |                                                                                                                                                                                                                                                                                                                         |   |                           |   |                         |   |                           |   |                     |   |                          |
| 3   | 3 = Moderately helpful                                                                              |                                                                                                                                                                                                                                                                                                                                                                |                                                                                                                                                                                                                                                                                                                         |   |                           |   |                         |   |                           |   |                     |   |                          |
| 4   | 4 = Very helpful                                                                                    |                                                                                                                                                                                                                                                                                                                                                                |                                                                                                                                                                                                                                                                                                                         |   |                           |   |                         |   |                           |   |                     |   |                          |
| 5   | 5 = Extremely helpful                                                                               |                                                                                                                                                                                                                                                                                                                                                                |                                                                                                                                                                                                                                                                                                                         |   |                           |   |                         |   |                           |   |                     |   |                          |
| 383 | <p>section_8_action_2_b</p> <p>Show the field ONLY if:<br/>[section_8_action_2_yes_no] = '1'</p>    | <p>B. How acceptable was reminding clinicians about the bundle among ICU team members?</p>                                                                                                                                                                                                                                                                     | <p>radio, Required</p> <table border="1"> <tr><td>1</td><td>1 = Not at all acceptable</td></tr> <tr><td>2</td><td>2 = Somewhat acceptable</td></tr> <tr><td>3</td><td>3 = Moderately acceptable</td></tr> <tr><td>4</td><td>4 = Very acceptable</td></tr> <tr><td>5</td><td>5 = Extremely acceptable</td></tr> </table> | 1 | 1 = Not at all acceptable | 2 | 2 = Somewhat acceptable | 3 | 3 = Moderately acceptable | 4 | 4 = Very acceptable | 5 | 5 = Extremely acceptable |
| 1   | 1 = Not at all acceptable                                                                           |                                                                                                                                                                                                                                                                                                                                                                |                                                                                                                                                                                                                                                                                                                         |   |                           |   |                         |   |                           |   |                     |   |                          |
| 2   | 2 = Somewhat acceptable                                                                             |                                                                                                                                                                                                                                                                                                                                                                |                                                                                                                                                                                                                                                                                                                         |   |                           |   |                         |   |                           |   |                     |   |                          |
| 3   | 3 = Moderately acceptable                                                                           |                                                                                                                                                                                                                                                                                                                                                                |                                                                                                                                                                                                                                                                                                                         |   |                           |   |                         |   |                           |   |                     |   |                          |
| 4   | 4 = Very acceptable                                                                                 |                                                                                                                                                                                                                                                                                                                                                                |                                                                                                                                                                                                                                                                                                                         |   |                           |   |                         |   |                           |   |                     |   |                          |
| 5   | 5 = Extremely acceptable                                                                            |                                                                                                                                                                                                                                                                                                                                                                |                                                                                                                                                                                                                                                                                                                         |   |                           |   |                         |   |                           |   |                     |   |                          |
| 384 | <p>section_8_action_2_c</p> <p>Show the field ONLY if:<br/>[section_8_action_2_yes_no] = '1'</p>    | <p>C. How feasible was it remind clinicians about the bundle?</p>                                                                                                                                                                                                                                                                                              | <p>radio, Required</p> <table border="1"> <tr><td>1</td><td>1 = Not at all feasible</td></tr> <tr><td>2</td><td>2 = Somewhat feasible</td></tr> <tr><td>3</td><td>3 = Moderately feasible</td></tr> <tr><td>4</td><td>4 = Very feasible</td></tr> <tr><td>5</td><td>5 = Extremely feasible</td></tr> </table>           | 1 | 1 = Not at all feasible   | 2 | 2 = Somewhat feasible   | 3 | 3 = Moderately feasible   | 4 | 4 = Very feasible   | 5 | 5 = Extremely feasible   |
| 1   | 1 = Not at all feasible                                                                             |                                                                                                                                                                                                                                                                                                                                                                |                                                                                                                                                                                                                                                                                                                         |   |                           |   |                         |   |                           |   |                     |   |                          |
| 2   | 2 = Somewhat feasible                                                                               |                                                                                                                                                                                                                                                                                                                                                                |                                                                                                                                                                                                                                                                                                                         |   |                           |   |                         |   |                           |   |                     |   |                          |
| 3   | 3 = Moderately feasible                                                                             |                                                                                                                                                                                                                                                                                                                                                                |                                                                                                                                                                                                                                                                                                                         |   |                           |   |                         |   |                           |   |                     |   |                          |
| 4   | 4 = Very feasible                                                                                   |                                                                                                                                                                                                                                                                                                                                                                |                                                                                                                                                                                                                                                                                                                         |   |                           |   |                         |   |                           |   |                     |   |                          |
| 5   | 5 = Extremely feasible                                                                              |                                                                                                                                                                                                                                                                                                                                                                |                                                                                                                                                                                                                                                                                                                         |   |                           |   |                         |   |                           |   |                     |   |                          |
| 385 | <p>section_8_action_2_d</p> <p>Show the field ONLY if:<br/>[section_8_action_2_yes_no] = '1'</p>    | <p>D. How costly (in terms of staff time, equipment, and other) was reminding clinicians about the bundle?</p>                                                                                                                                                                                                                                                 | <p>radio, Required</p> <table border="1"> <tr><td>1</td><td>1 =Not at all costly</td></tr> <tr><td>2</td><td>2 = Somewhat costly</td></tr> <tr><td>3</td><td>3 = Moderately costly</td></tr> <tr><td>4</td><td>4 = Very costly</td></tr> <tr><td>5</td><td>5 = Extremely costly</td></tr> </table>                      | 1 | 1 =Not at all costly      | 2 | 2 = Somewhat costly     | 3 | 3 = Moderately costly     | 4 | 4 = Very costly     | 5 | 5 = Extremely costly     |
| 1   | 1 =Not at all costly                                                                                |                                                                                                                                                                                                                                                                                                                                                                |                                                                                                                                                                                                                                                                                                                         |   |                           |   |                         |   |                           |   |                     |   |                          |
| 2   | 2 = Somewhat costly                                                                                 |                                                                                                                                                                                                                                                                                                                                                                |                                                                                                                                                                                                                                                                                                                         |   |                           |   |                         |   |                           |   |                     |   |                          |
| 3   | 3 = Moderately costly                                                                               |                                                                                                                                                                                                                                                                                                                                                                |                                                                                                                                                                                                                                                                                                                         |   |                           |   |                         |   |                           |   |                     |   |                          |
| 4   | 4 = Very costly                                                                                     |                                                                                                                                                                                                                                                                                                                                                                |                                                                                                                                                                                                                                                                                                                         |   |                           |   |                         |   |                           |   |                     |   |                          |
| 5   | 5 = Extremely costly                                                                                |                                                                                                                                                                                                                                                                                                                                                                |                                                                                                                                                                                                                                                                                                                         |   |                           |   |                         |   |                           |   |                     |   |                          |
| 386 | <p>section_8_action_3_yes_no</p>                                                                    | <p>Action 3: Facilitate relay of clinical data to providers</p> <p>Q: Did your institution provide as close to real-time data as possible about key measures of process/outcomes using integrated modes/channels of communication in a way that promotes use of the ABCDEF bundle?</p> <p>If action not used, mark "No" and go to next reflection question</p> | <p>yesno, Required</p> <table border="1"> <tr><td>1</td><td>Yes</td></tr> <tr><td>0</td><td>No</td></tr> </table> <p>Custom alignment: RH</p>                                                                                                                                                                           | 1 | Yes                       | 0 | No                      |   |                           |   |                     |   |                          |
| 1   | Yes                                                                                                 |                                                                                                                                                                                                                                                                                                                                                                |                                                                                                                                                                                                                                                                                                                         |   |                           |   |                         |   |                           |   |                     |   |                          |
| 0   | No                                                                                                  |                                                                                                                                                                                                                                                                                                                                                                |                                                                                                                                                                                                                                                                                                                         |   |                           |   |                         |   |                           |   |                     |   |                          |

|     |                                                                                                     |                                                                                                                                                                                                                                                                |                                                                                                                                                                                                                                                                                                                         |   |                           |   |                         |   |                           |   |                     |   |                          |
|-----|-----------------------------------------------------------------------------------------------------|----------------------------------------------------------------------------------------------------------------------------------------------------------------------------------------------------------------------------------------------------------------|-------------------------------------------------------------------------------------------------------------------------------------------------------------------------------------------------------------------------------------------------------------------------------------------------------------------------|---|---------------------------|---|-------------------------|---|---------------------------|---|---------------------|---|--------------------------|
| 387 | <p>section_8_action_3_text</p> <p>Show the field ONLY if:<br/>[section_8_action_3_yes_no] = '1'</p> | <p>When reflecting on your ICU's ABCDEF bundle implementation efforts:</p>                                                                                                                                                                                     | <p>descriptive</p>                                                                                                                                                                                                                                                                                                      |   |                           |   |                         |   |                           |   |                     |   |                          |
| 388 | <p>section_8_action_3_a</p> <p>Show the field ONLY if:<br/>[section_8_action_3_yes_no] = '1'</p>    | <p>A. How helpful was facilitating the relay of clinical data to providers for increasing bundle adoption?</p>                                                                                                                                                 | <p>radio, Required</p> <table border="1"> <tr><td>1</td><td>1 = Not at all helpful</td></tr> <tr><td>2</td><td>2 = Somewhat helpful</td></tr> <tr><td>3</td><td>3 = Moderately helpful</td></tr> <tr><td>4</td><td>4 = Very helpful</td></tr> <tr><td>5</td><td>5 = Extremely helpful</td></tr> </table>                | 1 | 1 = Not at all helpful    | 2 | 2 = Somewhat helpful    | 3 | 3 = Moderately helpful    | 4 | 4 = Very helpful    | 5 | 5 = Extremely helpful    |
| 1   | 1 = Not at all helpful                                                                              |                                                                                                                                                                                                                                                                |                                                                                                                                                                                                                                                                                                                         |   |                           |   |                         |   |                           |   |                     |   |                          |
| 2   | 2 = Somewhat helpful                                                                                |                                                                                                                                                                                                                                                                |                                                                                                                                                                                                                                                                                                                         |   |                           |   |                         |   |                           |   |                     |   |                          |
| 3   | 3 = Moderately helpful                                                                              |                                                                                                                                                                                                                                                                |                                                                                                                                                                                                                                                                                                                         |   |                           |   |                         |   |                           |   |                     |   |                          |
| 4   | 4 = Very helpful                                                                                    |                                                                                                                                                                                                                                                                |                                                                                                                                                                                                                                                                                                                         |   |                           |   |                         |   |                           |   |                     |   |                          |
| 5   | 5 = Extremely helpful                                                                               |                                                                                                                                                                                                                                                                |                                                                                                                                                                                                                                                                                                                         |   |                           |   |                         |   |                           |   |                     |   |                          |
| 389 | <p>section_8_action_3_b</p> <p>Show the field ONLY if:<br/>[section_8_action_3_yes_no] = '1'</p>    | <p>B. How acceptable was facilitating the relay of bundle-related clinical data to providers among ICU team members?</p>                                                                                                                                       | <p>radio, Required</p> <table border="1"> <tr><td>1</td><td>1 = Not at all acceptable</td></tr> <tr><td>2</td><td>2 = Somewhat acceptable</td></tr> <tr><td>3</td><td>3 = Moderately acceptable</td></tr> <tr><td>4</td><td>4 = Very acceptable</td></tr> <tr><td>5</td><td>5 = Extremely acceptable</td></tr> </table> | 1 | 1 = Not at all acceptable | 2 | 2 = Somewhat acceptable | 3 | 3 = Moderately acceptable | 4 | 4 = Very acceptable | 5 | 5 = Extremely acceptable |
| 1   | 1 = Not at all acceptable                                                                           |                                                                                                                                                                                                                                                                |                                                                                                                                                                                                                                                                                                                         |   |                           |   |                         |   |                           |   |                     |   |                          |
| 2   | 2 = Somewhat acceptable                                                                             |                                                                                                                                                                                                                                                                |                                                                                                                                                                                                                                                                                                                         |   |                           |   |                         |   |                           |   |                     |   |                          |
| 3   | 3 = Moderately acceptable                                                                           |                                                                                                                                                                                                                                                                |                                                                                                                                                                                                                                                                                                                         |   |                           |   |                         |   |                           |   |                     |   |                          |
| 4   | 4 = Very acceptable                                                                                 |                                                                                                                                                                                                                                                                |                                                                                                                                                                                                                                                                                                                         |   |                           |   |                         |   |                           |   |                     |   |                          |
| 5   | 5 = Extremely acceptable                                                                            |                                                                                                                                                                                                                                                                |                                                                                                                                                                                                                                                                                                                         |   |                           |   |                         |   |                           |   |                     |   |                          |
| 390 | <p>section_8_action_3_c</p> <p>Show the field ONLY if:<br/>[section_8_action_3_yes_no] = '1'</p>    | <p>C. How feasible was it to facilitate the relay of bundle-related clinical data to providers?</p>                                                                                                                                                            | <p>radio, Required</p> <table border="1"> <tr><td>1</td><td>1 = Not at all feasible</td></tr> <tr><td>2</td><td>2 = Somewhat feasible</td></tr> <tr><td>3</td><td>3 = Moderately feasible</td></tr> <tr><td>4</td><td>4 = Very feasible</td></tr> <tr><td>5</td><td>5 = Extremely feasible</td></tr> </table>           | 1 | 1 = Not at all feasible   | 2 | 2 = Somewhat feasible   | 3 | 3 = Moderately feasible   | 4 | 4 = Very feasible   | 5 | 5 = Extremely feasible   |
| 1   | 1 = Not at all feasible                                                                             |                                                                                                                                                                                                                                                                |                                                                                                                                                                                                                                                                                                                         |   |                           |   |                         |   |                           |   |                     |   |                          |
| 2   | 2 = Somewhat feasible                                                                               |                                                                                                                                                                                                                                                                |                                                                                                                                                                                                                                                                                                                         |   |                           |   |                         |   |                           |   |                     |   |                          |
| 3   | 3 = Moderately feasible                                                                             |                                                                                                                                                                                                                                                                |                                                                                                                                                                                                                                                                                                                         |   |                           |   |                         |   |                           |   |                     |   |                          |
| 4   | 4 = Very feasible                                                                                   |                                                                                                                                                                                                                                                                |                                                                                                                                                                                                                                                                                                                         |   |                           |   |                         |   |                           |   |                     |   |                          |
| 5   | 5 = Extremely feasible                                                                              |                                                                                                                                                                                                                                                                |                                                                                                                                                                                                                                                                                                                         |   |                           |   |                         |   |                           |   |                     |   |                          |
| 391 | <p>section_8_action_3_d</p> <p>Show the field ONLY if:<br/>[section_8_action_3_yes_no] = '1'</p>    | <p>D. How costly (in terms of staff time, equipment, and other) was facilitating the relay of bundle-related clinical data to providers?</p>                                                                                                                   | <p>radio, Required</p> <table border="1"> <tr><td>1</td><td>1 =Not at all costly</td></tr> <tr><td>2</td><td>2 = Somewhat costly</td></tr> <tr><td>3</td><td>3 = Moderately costly</td></tr> <tr><td>4</td><td>4 = Very costly</td></tr> <tr><td>5</td><td>5 = Extremely costly</td></tr> </table>                      | 1 | 1 =Not at all costly      | 2 | 2 = Somewhat costly     | 3 | 3 = Moderately costly     | 4 | 4 = Very costly     | 5 | 5 = Extremely costly     |
| 1   | 1 =Not at all costly                                                                                |                                                                                                                                                                                                                                                                |                                                                                                                                                                                                                                                                                                                         |   |                           |   |                         |   |                           |   |                     |   |                          |
| 2   | 2 = Somewhat costly                                                                                 |                                                                                                                                                                                                                                                                |                                                                                                                                                                                                                                                                                                                         |   |                           |   |                         |   |                           |   |                     |   |                          |
| 3   | 3 = Moderately costly                                                                               |                                                                                                                                                                                                                                                                |                                                                                                                                                                                                                                                                                                                         |   |                           |   |                         |   |                           |   |                     |   |                          |
| 4   | 4 = Very costly                                                                                     |                                                                                                                                                                                                                                                                |                                                                                                                                                                                                                                                                                                                         |   |                           |   |                         |   |                           |   |                     |   |                          |
| 5   | 5 = Extremely costly                                                                                |                                                                                                                                                                                                                                                                |                                                                                                                                                                                                                                                                                                                         |   |                           |   |                         |   |                           |   |                     |   |                          |
| 392 | <p>section_8_action_4_yes_no</p>                                                                    | <p>Action 4: Develop resource sharing agreements</p> <p>Q: Did your institution develop partnerships with organizations that have resources needed to implement the ABCDEF bundle?</p> <p>If action not used, mark "No" and go to next reflection question</p> | <p>yesno, Required</p> <table border="1"> <tr><td>1</td><td>Yes</td></tr> <tr><td>0</td><td>No</td></tr> </table> <p>Custom alignment: RH</p>                                                                                                                                                                           | 1 | Yes                       | 0 | No                      |   |                           |   |                     |   |                          |
| 1   | Yes                                                                                                 |                                                                                                                                                                                                                                                                |                                                                                                                                                                                                                                                                                                                         |   |                           |   |                         |   |                           |   |                     |   |                          |
| 0   | No                                                                                                  |                                                                                                                                                                                                                                                                |                                                                                                                                                                                                                                                                                                                         |   |                           |   |                         |   |                           |   |                     |   |                          |
| 393 | <p>section_8_action_4_text</p> <p>Show the field ONLY if:<br/>[section_8_action_4_yes_no] = '1'</p> | <p>When reflecting on your ICU's ABCDEF bundle implementation efforts:</p>                                                                                                                                                                                     | <p>descriptive</p>                                                                                                                                                                                                                                                                                                      |   |                           |   |                         |   |                           |   |                     |   |                          |
| 394 | <p>section_8_action_4_a</p> <p>Show the field ONLY if:<br/>[section_8_action_4_yes_no] = '1'</p>    | <p>A. How helpful was developing resource sharing agreements for increasing bundle adoption?</p>                                                                                                                                                               | <p>radio, Required</p> <table border="1"> <tr><td>1</td><td>1 = Not at all helpful</td></tr> <tr><td>2</td><td>2 = Somewhat helpful</td></tr> <tr><td>3</td><td>3 = Moderately helpful</td></tr> <tr><td>4</td><td>4 = Very helpful</td></tr> <tr><td>5</td><td>5 = Extremely helpful</td></tr> </table>                | 1 | 1 = Not at all helpful    | 2 | 2 = Somewhat helpful    | 3 | 3 = Moderately helpful    | 4 | 4 = Very helpful    | 5 | 5 = Extremely helpful    |
| 1   | 1 = Not at all helpful                                                                              |                                                                                                                                                                                                                                                                |                                                                                                                                                                                                                                                                                                                         |   |                           |   |                         |   |                           |   |                     |   |                          |
| 2   | 2 = Somewhat helpful                                                                                |                                                                                                                                                                                                                                                                |                                                                                                                                                                                                                                                                                                                         |   |                           |   |                         |   |                           |   |                     |   |                          |
| 3   | 3 = Moderately helpful                                                                              |                                                                                                                                                                                                                                                                |                                                                                                                                                                                                                                                                                                                         |   |                           |   |                         |   |                           |   |                     |   |                          |
| 4   | 4 = Very helpful                                                                                    |                                                                                                                                                                                                                                                                |                                                                                                                                                                                                                                                                                                                         |   |                           |   |                         |   |                           |   |                     |   |                          |
| 5   | 5 = Extremely helpful                                                                               |                                                                                                                                                                                                                                                                |                                                                                                                                                                                                                                                                                                                         |   |                           |   |                         |   |                           |   |                     |   |                          |
| 395 | <p>section_8_action_4_b</p> <p>Show the field ONLY if:<br/>[section_8_action_4_yes_no] = '1'</p>    | <p>B. How acceptable was developing bundle-related resource sharing agreements among ICU team members?</p>                                                                                                                                                     | <p>radio, Required</p> <table border="1"> <tr><td>1</td><td>1 = Not at all acceptable</td></tr> <tr><td>2</td><td>2 = Somewhat acceptable</td></tr> <tr><td>3</td><td>3 = Moderately acceptable</td></tr> <tr><td>4</td><td>4 = Very acceptable</td></tr> <tr><td>5</td><td>5 = Extremely acceptable</td></tr> </table> | 1 | 1 = Not at all acceptable | 2 | 2 = Somewhat acceptable | 3 | 3 = Moderately acceptable | 4 | 4 = Very acceptable | 5 | 5 = Extremely acceptable |
| 1   | 1 = Not at all acceptable                                                                           |                                                                                                                                                                                                                                                                |                                                                                                                                                                                                                                                                                                                         |   |                           |   |                         |   |                           |   |                     |   |                          |
| 2   | 2 = Somewhat acceptable                                                                             |                                                                                                                                                                                                                                                                |                                                                                                                                                                                                                                                                                                                         |   |                           |   |                         |   |                           |   |                     |   |                          |
| 3   | 3 = Moderately acceptable                                                                           |                                                                                                                                                                                                                                                                |                                                                                                                                                                                                                                                                                                                         |   |                           |   |                         |   |                           |   |                     |   |                          |
| 4   | 4 = Very acceptable                                                                                 |                                                                                                                                                                                                                                                                |                                                                                                                                                                                                                                                                                                                         |   |                           |   |                         |   |                           |   |                     |   |                          |
| 5   | 5 = Extremely acceptable                                                                            |                                                                                                                                                                                                                                                                |                                                                                                                                                                                                                                                                                                                         |   |                           |   |                         |   |                           |   |                     |   |                          |

|     |                                                                                                     |                                                                                                                                                                                                                                                                                                                                                                                     |                                                                                                                                                                                                                                                                                                                         |   |                           |   |                         |   |                           |   |                     |   |                          |
|-----|-----------------------------------------------------------------------------------------------------|-------------------------------------------------------------------------------------------------------------------------------------------------------------------------------------------------------------------------------------------------------------------------------------------------------------------------------------------------------------------------------------|-------------------------------------------------------------------------------------------------------------------------------------------------------------------------------------------------------------------------------------------------------------------------------------------------------------------------|---|---------------------------|---|-------------------------|---|---------------------------|---|---------------------|---|--------------------------|
| 396 | <p>section_8_action_4_c</p> <p>Show the field ONLY if:<br/>[section_8_action_4_yes_no] = '1'</p>    | <p>C. How feasible was it to develop bundle-related resource sharing agreements?</p>                                                                                                                                                                                                                                                                                                | <p>radio, Required</p> <table border="1"> <tr><td>1</td><td>1 = Not at all feasible</td></tr> <tr><td>2</td><td>2 = Somewhat feasible</td></tr> <tr><td>3</td><td>3 = Moderately feasible</td></tr> <tr><td>4</td><td>4 = Very feasible</td></tr> <tr><td>5</td><td>5 = Extremely feasible</td></tr> </table>           | 1 | 1 = Not at all feasible   | 2 | 2 = Somewhat feasible   | 3 | 3 = Moderately feasible   | 4 | 4 = Very feasible   | 5 | 5 = Extremely feasible   |
| 1   | 1 = Not at all feasible                                                                             |                                                                                                                                                                                                                                                                                                                                                                                     |                                                                                                                                                                                                                                                                                                                         |   |                           |   |                         |   |                           |   |                     |   |                          |
| 2   | 2 = Somewhat feasible                                                                               |                                                                                                                                                                                                                                                                                                                                                                                     |                                                                                                                                                                                                                                                                                                                         |   |                           |   |                         |   |                           |   |                     |   |                          |
| 3   | 3 = Moderately feasible                                                                             |                                                                                                                                                                                                                                                                                                                                                                                     |                                                                                                                                                                                                                                                                                                                         |   |                           |   |                         |   |                           |   |                     |   |                          |
| 4   | 4 = Very feasible                                                                                   |                                                                                                                                                                                                                                                                                                                                                                                     |                                                                                                                                                                                                                                                                                                                         |   |                           |   |                         |   |                           |   |                     |   |                          |
| 5   | 5 = Extremely feasible                                                                              |                                                                                                                                                                                                                                                                                                                                                                                     |                                                                                                                                                                                                                                                                                                                         |   |                           |   |                         |   |                           |   |                     |   |                          |
| 397 | <p>section_8_action_4_d</p> <p>Show the field ONLY if:<br/>[section_8_action_4_yes_no] = '1'</p>    | <p>D. How costly (in terms of staff time, equipment, and other) was developing bundle-related resource sharing agreements?</p>                                                                                                                                                                                                                                                      | <p>radio, Required</p> <table border="1"> <tr><td>1</td><td>1 =Not at all costly</td></tr> <tr><td>2</td><td>2 = Somewhat costly</td></tr> <tr><td>3</td><td>3 = Moderately costly</td></tr> <tr><td>4</td><td>4 = Very costly</td></tr> <tr><td>5</td><td>5 = Extremely costly</td></tr> </table>                      | 1 | 1 =Not at all costly      | 2 | 2 = Somewhat costly     | 3 | 3 = Moderately costly     | 4 | 4 = Very costly     | 5 | 5 = Extremely costly     |
| 1   | 1 =Not at all costly                                                                                |                                                                                                                                                                                                                                                                                                                                                                                     |                                                                                                                                                                                                                                                                                                                         |   |                           |   |                         |   |                           |   |                     |   |                          |
| 2   | 2 = Somewhat costly                                                                                 |                                                                                                                                                                                                                                                                                                                                                                                     |                                                                                                                                                                                                                                                                                                                         |   |                           |   |                         |   |                           |   |                     |   |                          |
| 3   | 3 = Moderately costly                                                                               |                                                                                                                                                                                                                                                                                                                                                                                     |                                                                                                                                                                                                                                                                                                                         |   |                           |   |                         |   |                           |   |                     |   |                          |
| 4   | 4 = Very costly                                                                                     |                                                                                                                                                                                                                                                                                                                                                                                     |                                                                                                                                                                                                                                                                                                                         |   |                           |   |                         |   |                           |   |                     |   |                          |
| 5   | 5 = Extremely costly                                                                                |                                                                                                                                                                                                                                                                                                                                                                                     |                                                                                                                                                                                                                                                                                                                         |   |                           |   |                         |   |                           |   |                     |   |                          |
| 398 | <p>section_8_action_5_yes_no</p>                                                                    | <p>Action 5: Revise professional roles</p> <p>Q: Did your institution shift and revise roles among professionals who provide ABCDEF bundle-related care and redesign job characteristics?</p> <p>If action not used, mark "No" and go to next reflection question</p>                                                                                                               | <p>yesno, Required</p> <table border="1"> <tr><td>1</td><td>Yes</td></tr> <tr><td>0</td><td>No</td></tr> </table> <p>Custom alignment: RH</p>                                                                                                                                                                           | 1 | Yes                       | 0 | No                      |   |                           |   |                     |   |                          |
| 1   | Yes                                                                                                 |                                                                                                                                                                                                                                                                                                                                                                                     |                                                                                                                                                                                                                                                                                                                         |   |                           |   |                         |   |                           |   |                     |   |                          |
| 0   | No                                                                                                  |                                                                                                                                                                                                                                                                                                                                                                                     |                                                                                                                                                                                                                                                                                                                         |   |                           |   |                         |   |                           |   |                     |   |                          |
| 399 | <p>section_8_action_5_text</p> <p>Show the field ONLY if:<br/>[section_8_action_5_yes_no] = '1'</p> | <p>When reflecting on your ICU's ABCDEF bundle implementation efforts:</p>                                                                                                                                                                                                                                                                                                          | <p>descriptive</p>                                                                                                                                                                                                                                                                                                      |   |                           |   |                         |   |                           |   |                     |   |                          |
| 400 | <p>section_8_action_5_a</p> <p>Show the field ONLY if:<br/>[section_8_action_5_yes_no] = '1'</p>    | <p>A. How helpful was revising professional roles in increasing bundle adoption?</p>                                                                                                                                                                                                                                                                                                | <p>radio, Required</p> <table border="1"> <tr><td>1</td><td>1 = Not at all helpful</td></tr> <tr><td>2</td><td>2 = Somewhat helpful</td></tr> <tr><td>3</td><td>3 = Moderately helpful</td></tr> <tr><td>4</td><td>4 = Very helpful</td></tr> <tr><td>5</td><td>5 = Extremely helpful</td></tr> </table>                | 1 | 1 = Not at all helpful    | 2 | 2 = Somewhat helpful    | 3 | 3 = Moderately helpful    | 4 | 4 = Very helpful    | 5 | 5 = Extremely helpful    |
| 1   | 1 = Not at all helpful                                                                              |                                                                                                                                                                                                                                                                                                                                                                                     |                                                                                                                                                                                                                                                                                                                         |   |                           |   |                         |   |                           |   |                     |   |                          |
| 2   | 2 = Somewhat helpful                                                                                |                                                                                                                                                                                                                                                                                                                                                                                     |                                                                                                                                                                                                                                                                                                                         |   |                           |   |                         |   |                           |   |                     |   |                          |
| 3   | 3 = Moderately helpful                                                                              |                                                                                                                                                                                                                                                                                                                                                                                     |                                                                                                                                                                                                                                                                                                                         |   |                           |   |                         |   |                           |   |                     |   |                          |
| 4   | 4 = Very helpful                                                                                    |                                                                                                                                                                                                                                                                                                                                                                                     |                                                                                                                                                                                                                                                                                                                         |   |                           |   |                         |   |                           |   |                     |   |                          |
| 5   | 5 = Extremely helpful                                                                               |                                                                                                                                                                                                                                                                                                                                                                                     |                                                                                                                                                                                                                                                                                                                         |   |                           |   |                         |   |                           |   |                     |   |                          |
| 401 | <p>section_8_action_5_b</p> <p>Show the field ONLY if:<br/>[section_8_action_5_yes_no] = '1'</p>    | <p>B. How acceptable was revising bundle-related professional roles among ICU team members?</p>                                                                                                                                                                                                                                                                                     | <p>radio, Required</p> <table border="1"> <tr><td>1</td><td>1 = Not at all acceptable</td></tr> <tr><td>2</td><td>2 = Somewhat acceptable</td></tr> <tr><td>3</td><td>3 = Moderately acceptable</td></tr> <tr><td>4</td><td>4 = Very acceptable</td></tr> <tr><td>5</td><td>5 = Extremely acceptable</td></tr> </table> | 1 | 1 = Not at all acceptable | 2 | 2 = Somewhat acceptable | 3 | 3 = Moderately acceptable | 4 | 4 = Very acceptable | 5 | 5 = Extremely acceptable |
| 1   | 1 = Not at all acceptable                                                                           |                                                                                                                                                                                                                                                                                                                                                                                     |                                                                                                                                                                                                                                                                                                                         |   |                           |   |                         |   |                           |   |                     |   |                          |
| 2   | 2 = Somewhat acceptable                                                                             |                                                                                                                                                                                                                                                                                                                                                                                     |                                                                                                                                                                                                                                                                                                                         |   |                           |   |                         |   |                           |   |                     |   |                          |
| 3   | 3 = Moderately acceptable                                                                           |                                                                                                                                                                                                                                                                                                                                                                                     |                                                                                                                                                                                                                                                                                                                         |   |                           |   |                         |   |                           |   |                     |   |                          |
| 4   | 4 = Very acceptable                                                                                 |                                                                                                                                                                                                                                                                                                                                                                                     |                                                                                                                                                                                                                                                                                                                         |   |                           |   |                         |   |                           |   |                     |   |                          |
| 5   | 5 = Extremely acceptable                                                                            |                                                                                                                                                                                                                                                                                                                                                                                     |                                                                                                                                                                                                                                                                                                                         |   |                           |   |                         |   |                           |   |                     |   |                          |
| 402 | <p>section_8_action_5_c</p> <p>Show the field ONLY if:<br/>[section_8_action_5_yes_no] = '1'</p>    | <p>C. How feasible was it to revise bundle-related professional roles?</p>                                                                                                                                                                                                                                                                                                          | <p>radio, Required</p> <table border="1"> <tr><td>1</td><td>1 = Not at all feasible</td></tr> <tr><td>2</td><td>2 = Somewhat feasible</td></tr> <tr><td>3</td><td>3 = Moderately feasible</td></tr> <tr><td>4</td><td>4 = Very feasible</td></tr> <tr><td>5</td><td>5 = Extremely feasible</td></tr> </table>           | 1 | 1 = Not at all feasible   | 2 | 2 = Somewhat feasible   | 3 | 3 = Moderately feasible   | 4 | 4 = Very feasible   | 5 | 5 = Extremely feasible   |
| 1   | 1 = Not at all feasible                                                                             |                                                                                                                                                                                                                                                                                                                                                                                     |                                                                                                                                                                                                                                                                                                                         |   |                           |   |                         |   |                           |   |                     |   |                          |
| 2   | 2 = Somewhat feasible                                                                               |                                                                                                                                                                                                                                                                                                                                                                                     |                                                                                                                                                                                                                                                                                                                         |   |                           |   |                         |   |                           |   |                     |   |                          |
| 3   | 3 = Moderately feasible                                                                             |                                                                                                                                                                                                                                                                                                                                                                                     |                                                                                                                                                                                                                                                                                                                         |   |                           |   |                         |   |                           |   |                     |   |                          |
| 4   | 4 = Very feasible                                                                                   |                                                                                                                                                                                                                                                                                                                                                                                     |                                                                                                                                                                                                                                                                                                                         |   |                           |   |                         |   |                           |   |                     |   |                          |
| 5   | 5 = Extremely feasible                                                                              |                                                                                                                                                                                                                                                                                                                                                                                     |                                                                                                                                                                                                                                                                                                                         |   |                           |   |                         |   |                           |   |                     |   |                          |
| 403 | <p>section_8_action_5_d</p> <p>Show the field ONLY if:<br/>[section_8_action_5_yes_no] = '1'</p>    | <p>D. How costly (in terms of staff time, equipment, and other) was revising bundle-related professional roles?</p>                                                                                                                                                                                                                                                                 | <p>radio, Required</p> <table border="1"> <tr><td>1</td><td>1 =Not at all costly</td></tr> <tr><td>2</td><td>2 = Somewhat costly</td></tr> <tr><td>3</td><td>3 = Moderately costly</td></tr> <tr><td>4</td><td>4 = Very costly</td></tr> <tr><td>5</td><td>5 = Extremely costly</td></tr> </table>                      | 1 | 1 =Not at all costly      | 2 | 2 = Somewhat costly     | 3 | 3 = Moderately costly     | 4 | 4 = Very costly     | 5 | 5 = Extremely costly     |
| 1   | 1 =Not at all costly                                                                                |                                                                                                                                                                                                                                                                                                                                                                                     |                                                                                                                                                                                                                                                                                                                         |   |                           |   |                         |   |                           |   |                     |   |                          |
| 2   | 2 = Somewhat costly                                                                                 |                                                                                                                                                                                                                                                                                                                                                                                     |                                                                                                                                                                                                                                                                                                                         |   |                           |   |                         |   |                           |   |                     |   |                          |
| 3   | 3 = Moderately costly                                                                               |                                                                                                                                                                                                                                                                                                                                                                                     |                                                                                                                                                                                                                                                                                                                         |   |                           |   |                         |   |                           |   |                     |   |                          |
| 4   | 4 = Very costly                                                                                     |                                                                                                                                                                                                                                                                                                                                                                                     |                                                                                                                                                                                                                                                                                                                         |   |                           |   |                         |   |                           |   |                     |   |                          |
| 5   | 5 = Extremely costly                                                                                |                                                                                                                                                                                                                                                                                                                                                                                     |                                                                                                                                                                                                                                                                                                                         |   |                           |   |                         |   |                           |   |                     |   |                          |
| 404 | <p>section_9_text</p>                                                                               | <p>Section Header:<br/>SECTION 9: CHANGE INFRASTRUCTURE (8 QUESTIONS)</p>                                                                                                                                                                                                                                                                                                           | <p>descriptive</p>                                                                                                                                                                                                                                                                                                      |   |                           |   |                         |   |                           |   |                     |   |                          |
| 405 | <p>section_9_action_1_yes_no</p>                                                                    | <p>Action 1: Change physical structure and equipment</p> <p>Q: Did your institution evaluate current configurations and adapt, as needed, the physical structure (e.g., room/unit), equipment (e.g., walkers, portable ventilators), or other factors to best accommodate ABCDEF bundle implementation?</p> <p>If action not used, mark "No" and go to next reflection question</p> | <p>yesno, Required</p> <table border="1"> <tr><td>1</td><td>Yes</td></tr> <tr><td>0</td><td>No</td></tr> </table> <p>Custom alignment: RH</p>                                                                                                                                                                           | 1 | Yes                       | 0 | No                      |   |                           |   |                     |   |                          |
| 1   | Yes                                                                                                 |                                                                                                                                                                                                                                                                                                                                                                                     |                                                                                                                                                                                                                                                                                                                         |   |                           |   |                         |   |                           |   |                     |   |                          |
| 0   | No                                                                                                  |                                                                                                                                                                                                                                                                                                                                                                                     |                                                                                                                                                                                                                                                                                                                         |   |                           |   |                         |   |                           |   |                     |   |                          |

|     |                                                                                                     |                                                                                                                                                                                                                                                                                                                    |                                                                                                                                                                                                                                                                                                                         |   |                           |   |                         |   |                           |   |                     |   |                          |
|-----|-----------------------------------------------------------------------------------------------------|--------------------------------------------------------------------------------------------------------------------------------------------------------------------------------------------------------------------------------------------------------------------------------------------------------------------|-------------------------------------------------------------------------------------------------------------------------------------------------------------------------------------------------------------------------------------------------------------------------------------------------------------------------|---|---------------------------|---|-------------------------|---|---------------------------|---|---------------------|---|--------------------------|
| 406 | <p>section_9_action_1_text</p> <p>Show the field ONLY if:<br/>[section_9_action_1_yes_no] = '1'</p> | <p>When reflecting on your ICU's ABCDEF bundle implementation efforts:</p>                                                                                                                                                                                                                                         | <p>descriptive</p>                                                                                                                                                                                                                                                                                                      |   |                           |   |                         |   |                           |   |                     |   |                          |
| 407 | <p>section_9_action_1_a</p> <p>Show the field ONLY if:<br/>[section_9_action_1_yes_no] = '1'</p>    | <p>A. How helpful was changing the physical structure and equipment in increasing bundle adoption?</p>                                                                                                                                                                                                             | <p>radio, Required</p> <table border="1"> <tr><td>1</td><td>1 = Not at all helpful</td></tr> <tr><td>2</td><td>2 = Somewhat helpful</td></tr> <tr><td>3</td><td>3 = Moderately helpful</td></tr> <tr><td>4</td><td>4 = Very helpful</td></tr> <tr><td>5</td><td>5 = Extremely helpful</td></tr> </table>                | 1 | 1 = Not at all helpful    | 2 | 2 = Somewhat helpful    | 3 | 3 = Moderately helpful    | 4 | 4 = Very helpful    | 5 | 5 = Extremely helpful    |
| 1   | 1 = Not at all helpful                                                                              |                                                                                                                                                                                                                                                                                                                    |                                                                                                                                                                                                                                                                                                                         |   |                           |   |                         |   |                           |   |                     |   |                          |
| 2   | 2 = Somewhat helpful                                                                                |                                                                                                                                                                                                                                                                                                                    |                                                                                                                                                                                                                                                                                                                         |   |                           |   |                         |   |                           |   |                     |   |                          |
| 3   | 3 = Moderately helpful                                                                              |                                                                                                                                                                                                                                                                                                                    |                                                                                                                                                                                                                                                                                                                         |   |                           |   |                         |   |                           |   |                     |   |                          |
| 4   | 4 = Very helpful                                                                                    |                                                                                                                                                                                                                                                                                                                    |                                                                                                                                                                                                                                                                                                                         |   |                           |   |                         |   |                           |   |                     |   |                          |
| 5   | 5 = Extremely helpful                                                                               |                                                                                                                                                                                                                                                                                                                    |                                                                                                                                                                                                                                                                                                                         |   |                           |   |                         |   |                           |   |                     |   |                          |
| 408 | <p>section_9_action_1_b</p> <p>Show the field ONLY if:<br/>[section_9_action_1_yes_no] = '1'</p>    | <p>B. How acceptable was changing the physical structure and equipment needed for bundle implementation among ICU team members?</p>                                                                                                                                                                                | <p>radio, Required</p> <table border="1"> <tr><td>1</td><td>1 = Not at all acceptable</td></tr> <tr><td>2</td><td>2 = Somewhat acceptable</td></tr> <tr><td>3</td><td>3 = Moderately acceptable</td></tr> <tr><td>4</td><td>4 = Very acceptable</td></tr> <tr><td>5</td><td>5 = Extremely acceptable</td></tr> </table> | 1 | 1 = Not at all acceptable | 2 | 2 = Somewhat acceptable | 3 | 3 = Moderately acceptable | 4 | 4 = Very acceptable | 5 | 5 = Extremely acceptable |
| 1   | 1 = Not at all acceptable                                                                           |                                                                                                                                                                                                                                                                                                                    |                                                                                                                                                                                                                                                                                                                         |   |                           |   |                         |   |                           |   |                     |   |                          |
| 2   | 2 = Somewhat acceptable                                                                             |                                                                                                                                                                                                                                                                                                                    |                                                                                                                                                                                                                                                                                                                         |   |                           |   |                         |   |                           |   |                     |   |                          |
| 3   | 3 = Moderately acceptable                                                                           |                                                                                                                                                                                                                                                                                                                    |                                                                                                                                                                                                                                                                                                                         |   |                           |   |                         |   |                           |   |                     |   |                          |
| 4   | 4 = Very acceptable                                                                                 |                                                                                                                                                                                                                                                                                                                    |                                                                                                                                                                                                                                                                                                                         |   |                           |   |                         |   |                           |   |                     |   |                          |
| 5   | 5 = Extremely acceptable                                                                            |                                                                                                                                                                                                                                                                                                                    |                                                                                                                                                                                                                                                                                                                         |   |                           |   |                         |   |                           |   |                     |   |                          |
| 409 | <p>section_9_action_1_c</p> <p>Show the field ONLY if:<br/>[section_9_action_1_yes_no] = '1'</p>    | <p>C. How feasible was it to change the physical structure and equipment needed for bundle implementation?</p>                                                                                                                                                                                                     | <p>radio, Required</p> <table border="1"> <tr><td>1</td><td>1 = Not at all feasible</td></tr> <tr><td>2</td><td>2 = Somewhat feasible</td></tr> <tr><td>3</td><td>3 = Moderately feasible</td></tr> <tr><td>4</td><td>4 = Very feasible</td></tr> <tr><td>5</td><td>5 = Extremely feasible</td></tr> </table>           | 1 | 1 = Not at all feasible   | 2 | 2 = Somewhat feasible   | 3 | 3 = Moderately feasible   | 4 | 4 = Very feasible   | 5 | 5 = Extremely feasible   |
| 1   | 1 = Not at all feasible                                                                             |                                                                                                                                                                                                                                                                                                                    |                                                                                                                                                                                                                                                                                                                         |   |                           |   |                         |   |                           |   |                     |   |                          |
| 2   | 2 = Somewhat feasible                                                                               |                                                                                                                                                                                                                                                                                                                    |                                                                                                                                                                                                                                                                                                                         |   |                           |   |                         |   |                           |   |                     |   |                          |
| 3   | 3 = Moderately feasible                                                                             |                                                                                                                                                                                                                                                                                                                    |                                                                                                                                                                                                                                                                                                                         |   |                           |   |                         |   |                           |   |                     |   |                          |
| 4   | 4 = Very feasible                                                                                   |                                                                                                                                                                                                                                                                                                                    |                                                                                                                                                                                                                                                                                                                         |   |                           |   |                         |   |                           |   |                     |   |                          |
| 5   | 5 = Extremely feasible                                                                              |                                                                                                                                                                                                                                                                                                                    |                                                                                                                                                                                                                                                                                                                         |   |                           |   |                         |   |                           |   |                     |   |                          |
| 410 | <p>section_9_action_1_d</p> <p>Show the field ONLY if:<br/>[section_9_action_1_yes_no] = '1'</p>    | <p>D. How costly (in terms of staff time, equipment, and other) was changing the physical structure and equipment needed for bundle implementation?</p>                                                                                                                                                            | <p>radio, Required</p> <table border="1"> <tr><td>1</td><td>1 =Not at all costly</td></tr> <tr><td>2</td><td>2 = Somewhat costly</td></tr> <tr><td>3</td><td>3 = Moderately costly</td></tr> <tr><td>4</td><td>4 = Very costly</td></tr> <tr><td>5</td><td>5 = Extremely costly</td></tr> </table>                      | 1 | 1 =Not at all costly      | 2 | 2 = Somewhat costly     | 3 | 3 = Moderately costly     | 4 | 4 = Very costly     | 5 | 5 = Extremely costly     |
| 1   | 1 =Not at all costly                                                                                |                                                                                                                                                                                                                                                                                                                    |                                                                                                                                                                                                                                                                                                                         |   |                           |   |                         |   |                           |   |                     |   |                          |
| 2   | 2 = Somewhat costly                                                                                 |                                                                                                                                                                                                                                                                                                                    |                                                                                                                                                                                                                                                                                                                         |   |                           |   |                         |   |                           |   |                     |   |                          |
| 3   | 3 = Moderately costly                                                                               |                                                                                                                                                                                                                                                                                                                    |                                                                                                                                                                                                                                                                                                                         |   |                           |   |                         |   |                           |   |                     |   |                          |
| 4   | 4 = Very costly                                                                                     |                                                                                                                                                                                                                                                                                                                    |                                                                                                                                                                                                                                                                                                                         |   |                           |   |                         |   |                           |   |                     |   |                          |
| 5   | 5 = Extremely costly                                                                                |                                                                                                                                                                                                                                                                                                                    |                                                                                                                                                                                                                                                                                                                         |   |                           |   |                         |   |                           |   |                     |   |                          |
| 411 | <p>section_9_action_2_yes_no</p>                                                                    | <p>Action 2: Start a dissemination organization</p> <p>Q: Did your institution identify or start a separate organization that is responsible for disseminating the ABCDEF bundle? It could be a for-profit or non-profit organization.</p> <p>If action not used, mark "No" and go to next reflection question</p> | <p>yesno, Required</p> <table border="1"> <tr><td>1</td><td>Yes</td></tr> <tr><td>0</td><td>No</td></tr> </table> <p>Custom alignment: RH</p>                                                                                                                                                                           | 1 | Yes                       | 0 | No                      |   |                           |   |                     |   |                          |
| 1   | Yes                                                                                                 |                                                                                                                                                                                                                                                                                                                    |                                                                                                                                                                                                                                                                                                                         |   |                           |   |                         |   |                           |   |                     |   |                          |
| 0   | No                                                                                                  |                                                                                                                                                                                                                                                                                                                    |                                                                                                                                                                                                                                                                                                                         |   |                           |   |                         |   |                           |   |                     |   |                          |
| 412 | <p>section_9_action_2_text</p> <p>Show the field ONLY if:<br/>[section_9_action_2_yes_no] = '1'</p> | <p>When reflecting on your ICU's ABCDEF bundle implementation efforts:</p>                                                                                                                                                                                                                                         | <p>descriptive</p>                                                                                                                                                                                                                                                                                                      |   |                           |   |                         |   |                           |   |                     |   |                          |
| 413 | <p>section_9_action_2_a</p> <p>Show the field ONLY if:<br/>[section_9_action_2_yes_no] = '1'</p>    | <p>A. How helpful was starting a dissemination organization for increasing bundle adoption?</p>                                                                                                                                                                                                                    | <p>radio, Required</p> <table border="1"> <tr><td>1</td><td>1 = Not at all helpful</td></tr> <tr><td>2</td><td>2 = Somewhat helpful</td></tr> <tr><td>3</td><td>3 = Moderately helpful</td></tr> <tr><td>4</td><td>4 = Very helpful</td></tr> <tr><td>5</td><td>5 = Extremely helpful</td></tr> </table>                | 1 | 1 = Not at all helpful    | 2 | 2 = Somewhat helpful    | 3 | 3 = Moderately helpful    | 4 | 4 = Very helpful    | 5 | 5 = Extremely helpful    |
| 1   | 1 = Not at all helpful                                                                              |                                                                                                                                                                                                                                                                                                                    |                                                                                                                                                                                                                                                                                                                         |   |                           |   |                         |   |                           |   |                     |   |                          |
| 2   | 2 = Somewhat helpful                                                                                |                                                                                                                                                                                                                                                                                                                    |                                                                                                                                                                                                                                                                                                                         |   |                           |   |                         |   |                           |   |                     |   |                          |
| 3   | 3 = Moderately helpful                                                                              |                                                                                                                                                                                                                                                                                                                    |                                                                                                                                                                                                                                                                                                                         |   |                           |   |                         |   |                           |   |                     |   |                          |
| 4   | 4 = Very helpful                                                                                    |                                                                                                                                                                                                                                                                                                                    |                                                                                                                                                                                                                                                                                                                         |   |                           |   |                         |   |                           |   |                     |   |                          |
| 5   | 5 = Extremely helpful                                                                               |                                                                                                                                                                                                                                                                                                                    |                                                                                                                                                                                                                                                                                                                         |   |                           |   |                         |   |                           |   |                     |   |                          |
| 414 | <p>section_9_action_2_b</p> <p>Show the field ONLY if:<br/>[section_9_action_2_yes_no] = '1'</p>    | <p>B. How acceptable was starting a bundle-related dissemination organization among ICU team members?</p>                                                                                                                                                                                                          | <p>radio, Required</p> <table border="1"> <tr><td>1</td><td>1 = Not at all acceptable</td></tr> <tr><td>2</td><td>2 = Somewhat acceptable</td></tr> <tr><td>3</td><td>3 = Moderately acceptable</td></tr> <tr><td>4</td><td>4 = Very acceptable</td></tr> <tr><td>5</td><td>5 = Extremely acceptable</td></tr> </table> | 1 | 1 = Not at all acceptable | 2 | 2 = Somewhat acceptable | 3 | 3 = Moderately acceptable | 4 | 4 = Very acceptable | 5 | 5 = Extremely acceptable |
| 1   | 1 = Not at all acceptable                                                                           |                                                                                                                                                                                                                                                                                                                    |                                                                                                                                                                                                                                                                                                                         |   |                           |   |                         |   |                           |   |                     |   |                          |
| 2   | 2 = Somewhat acceptable                                                                             |                                                                                                                                                                                                                                                                                                                    |                                                                                                                                                                                                                                                                                                                         |   |                           |   |                         |   |                           |   |                     |   |                          |
| 3   | 3 = Moderately acceptable                                                                           |                                                                                                                                                                                                                                                                                                                    |                                                                                                                                                                                                                                                                                                                         |   |                           |   |                         |   |                           |   |                     |   |                          |
| 4   | 4 = Very acceptable                                                                                 |                                                                                                                                                                                                                                                                                                                    |                                                                                                                                                                                                                                                                                                                         |   |                           |   |                         |   |                           |   |                     |   |                          |
| 5   | 5 = Extremely acceptable                                                                            |                                                                                                                                                                                                                                                                                                                    |                                                                                                                                                                                                                                                                                                                         |   |                           |   |                         |   |                           |   |                     |   |                          |

|     |                                                                                                     |                                                                                                                                                                                                                                                                 |                                                                                                                                                                                                                                                                                                                         |   |                           |   |                         |   |                           |   |                     |   |                          |
|-----|-----------------------------------------------------------------------------------------------------|-----------------------------------------------------------------------------------------------------------------------------------------------------------------------------------------------------------------------------------------------------------------|-------------------------------------------------------------------------------------------------------------------------------------------------------------------------------------------------------------------------------------------------------------------------------------------------------------------------|---|---------------------------|---|-------------------------|---|---------------------------|---|---------------------|---|--------------------------|
| 415 | <p>section_9_action_2_c</p> <p>Show the field ONLY if:<br/>[section_9_action_2_yes_no] = '1'</p>    | <p>C. How feasible was it to start a bundle-related dissemination organization?</p>                                                                                                                                                                             | <p>radio, Required</p> <table border="1"> <tr><td>1</td><td>1 = Not at all feasible</td></tr> <tr><td>2</td><td>2 = Somewhat feasible</td></tr> <tr><td>3</td><td>3 = Moderately feasible</td></tr> <tr><td>4</td><td>4 = Very feasible</td></tr> <tr><td>5</td><td>5 = Extremely feasible</td></tr> </table>           | 1 | 1 = Not at all feasible   | 2 | 2 = Somewhat feasible   | 3 | 3 = Moderately feasible   | 4 | 4 = Very feasible   | 5 | 5 = Extremely feasible   |
| 1   | 1 = Not at all feasible                                                                             |                                                                                                                                                                                                                                                                 |                                                                                                                                                                                                                                                                                                                         |   |                           |   |                         |   |                           |   |                     |   |                          |
| 2   | 2 = Somewhat feasible                                                                               |                                                                                                                                                                                                                                                                 |                                                                                                                                                                                                                                                                                                                         |   |                           |   |                         |   |                           |   |                     |   |                          |
| 3   | 3 = Moderately feasible                                                                             |                                                                                                                                                                                                                                                                 |                                                                                                                                                                                                                                                                                                                         |   |                           |   |                         |   |                           |   |                     |   |                          |
| 4   | 4 = Very feasible                                                                                   |                                                                                                                                                                                                                                                                 |                                                                                                                                                                                                                                                                                                                         |   |                           |   |                         |   |                           |   |                     |   |                          |
| 5   | 5 = Extremely feasible                                                                              |                                                                                                                                                                                                                                                                 |                                                                                                                                                                                                                                                                                                                         |   |                           |   |                         |   |                           |   |                     |   |                          |
| 416 | <p>section_9_action_2_d</p> <p>Show the field ONLY if:<br/>[section_9_action_2_yes_no] = '1'</p>    | <p>D. How costly (in terms of staff time, equipment, and other) was starting a bundle-related dissemination organization?</p>                                                                                                                                   | <p>radio, Required</p> <table border="1"> <tr><td>1</td><td>1 =Not at all costly</td></tr> <tr><td>2</td><td>2 = Somewhat costly</td></tr> <tr><td>3</td><td>3 = Moderately costly</td></tr> <tr><td>4</td><td>4 = Very costly</td></tr> <tr><td>5</td><td>5 = Extremely costly</td></tr> </table>                      | 1 | 1 =Not at all costly      | 2 | 2 = Somewhat costly     | 3 | 3 = Moderately costly     | 4 | 4 = Very costly     | 5 | 5 = Extremely costly     |
| 1   | 1 =Not at all costly                                                                                |                                                                                                                                                                                                                                                                 |                                                                                                                                                                                                                                                                                                                         |   |                           |   |                         |   |                           |   |                     |   |                          |
| 2   | 2 = Somewhat costly                                                                                 |                                                                                                                                                                                                                                                                 |                                                                                                                                                                                                                                                                                                                         |   |                           |   |                         |   |                           |   |                     |   |                          |
| 3   | 3 = Moderately costly                                                                               |                                                                                                                                                                                                                                                                 |                                                                                                                                                                                                                                                                                                                         |   |                           |   |                         |   |                           |   |                     |   |                          |
| 4   | 4 = Very costly                                                                                     |                                                                                                                                                                                                                                                                 |                                                                                                                                                                                                                                                                                                                         |   |                           |   |                         |   |                           |   |                     |   |                          |
| 5   | 5 = Extremely costly                                                                                |                                                                                                                                                                                                                                                                 |                                                                                                                                                                                                                                                                                                                         |   |                           |   |                         |   |                           |   |                     |   |                          |
| 417 | <p>section_9_action_3_yes_no</p>                                                                    | <p>Action 3: Change liability Laws</p> <p>Q: Did your institution participate in liability reform efforts that make clinicians more willing to deliver the ABCDEF bundle?</p> <p>If action not used, mark "No" and go to next reflection question</p>           | <p>yesno, Required</p> <table border="1"> <tr><td>1</td><td>Yes</td></tr> <tr><td>0</td><td>No</td></tr> </table> <p>Custom alignment: RH</p>                                                                                                                                                                           | 1 | Yes                       | 0 | No                      |   |                           |   |                     |   |                          |
| 1   | Yes                                                                                                 |                                                                                                                                                                                                                                                                 |                                                                                                                                                                                                                                                                                                                         |   |                           |   |                         |   |                           |   |                     |   |                          |
| 0   | No                                                                                                  |                                                                                                                                                                                                                                                                 |                                                                                                                                                                                                                                                                                                                         |   |                           |   |                         |   |                           |   |                     |   |                          |
| 418 | <p>section_9_action_3_text</p> <p>Show the field ONLY if:<br/>[section_9_action_3_yes_no] = '1'</p> | <p>When reflecting on your ICU's ABCDEF bundle implementation efforts:</p>                                                                                                                                                                                      | <p>descriptive</p>                                                                                                                                                                                                                                                                                                      |   |                           |   |                         |   |                           |   |                     |   |                          |
| 419 | <p>section_9_action_3_a</p> <p>Show the field ONLY if:<br/>[section_9_action_3_yes_no] = '1'</p>    | <p>A. How helpful was changing liability laws for increasing bundle adoption?</p>                                                                                                                                                                               | <p>radio, Required</p> <table border="1"> <tr><td>1</td><td>1 = Not at all helpful</td></tr> <tr><td>2</td><td>2 = Somewhat helpful</td></tr> <tr><td>3</td><td>3 = Moderately helpful</td></tr> <tr><td>4</td><td>4 = Very helpful</td></tr> <tr><td>5</td><td>5 = Extremely helpful</td></tr> </table>                | 1 | 1 = Not at all helpful    | 2 | 2 = Somewhat helpful    | 3 | 3 = Moderately helpful    | 4 | 4 = Very helpful    | 5 | 5 = Extremely helpful    |
| 1   | 1 = Not at all helpful                                                                              |                                                                                                                                                                                                                                                                 |                                                                                                                                                                                                                                                                                                                         |   |                           |   |                         |   |                           |   |                     |   |                          |
| 2   | 2 = Somewhat helpful                                                                                |                                                                                                                                                                                                                                                                 |                                                                                                                                                                                                                                                                                                                         |   |                           |   |                         |   |                           |   |                     |   |                          |
| 3   | 3 = Moderately helpful                                                                              |                                                                                                                                                                                                                                                                 |                                                                                                                                                                                                                                                                                                                         |   |                           |   |                         |   |                           |   |                     |   |                          |
| 4   | 4 = Very helpful                                                                                    |                                                                                                                                                                                                                                                                 |                                                                                                                                                                                                                                                                                                                         |   |                           |   |                         |   |                           |   |                     |   |                          |
| 5   | 5 = Extremely helpful                                                                               |                                                                                                                                                                                                                                                                 |                                                                                                                                                                                                                                                                                                                         |   |                           |   |                         |   |                           |   |                     |   |                          |
| 420 | <p>section_9_action_3_b</p> <p>Show the field ONLY if:<br/>[section_9_action_3_yes_no] = '1'</p>    | <p>B. How acceptable was changing bundle-related liability laws among ICU team members?</p>                                                                                                                                                                     | <p>radio, Required</p> <table border="1"> <tr><td>1</td><td>1 = Not at all acceptable</td></tr> <tr><td>2</td><td>2 = Somewhat acceptable</td></tr> <tr><td>3</td><td>3 = Moderately acceptable</td></tr> <tr><td>4</td><td>4 = Very acceptable</td></tr> <tr><td>5</td><td>5 = Extremely acceptable</td></tr> </table> | 1 | 1 = Not at all acceptable | 2 | 2 = Somewhat acceptable | 3 | 3 = Moderately acceptable | 4 | 4 = Very acceptable | 5 | 5 = Extremely acceptable |
| 1   | 1 = Not at all acceptable                                                                           |                                                                                                                                                                                                                                                                 |                                                                                                                                                                                                                                                                                                                         |   |                           |   |                         |   |                           |   |                     |   |                          |
| 2   | 2 = Somewhat acceptable                                                                             |                                                                                                                                                                                                                                                                 |                                                                                                                                                                                                                                                                                                                         |   |                           |   |                         |   |                           |   |                     |   |                          |
| 3   | 3 = Moderately acceptable                                                                           |                                                                                                                                                                                                                                                                 |                                                                                                                                                                                                                                                                                                                         |   |                           |   |                         |   |                           |   |                     |   |                          |
| 4   | 4 = Very acceptable                                                                                 |                                                                                                                                                                                                                                                                 |                                                                                                                                                                                                                                                                                                                         |   |                           |   |                         |   |                           |   |                     |   |                          |
| 5   | 5 = Extremely acceptable                                                                            |                                                                                                                                                                                                                                                                 |                                                                                                                                                                                                                                                                                                                         |   |                           |   |                         |   |                           |   |                     |   |                          |
| 421 | <p>section_9_action_3_c</p> <p>Show the field ONLY if:<br/>[section_9_action_3_yes_no] = '1'</p>    | <p>C. How feasible was it to change bundle-related liability laws?</p>                                                                                                                                                                                          | <p>radio, Required</p> <table border="1"> <tr><td>1</td><td>1 = Not at all feasible</td></tr> <tr><td>2</td><td>2 = Somewhat feasible</td></tr> <tr><td>3</td><td>3 = Moderately feasible</td></tr> <tr><td>4</td><td>4 = Very feasible</td></tr> <tr><td>5</td><td>5 = Extremely feasible</td></tr> </table>           | 1 | 1 = Not at all feasible   | 2 | 2 = Somewhat feasible   | 3 | 3 = Moderately feasible   | 4 | 4 = Very feasible   | 5 | 5 = Extremely feasible   |
| 1   | 1 = Not at all feasible                                                                             |                                                                                                                                                                                                                                                                 |                                                                                                                                                                                                                                                                                                                         |   |                           |   |                         |   |                           |   |                     |   |                          |
| 2   | 2 = Somewhat feasible                                                                               |                                                                                                                                                                                                                                                                 |                                                                                                                                                                                                                                                                                                                         |   |                           |   |                         |   |                           |   |                     |   |                          |
| 3   | 3 = Moderately feasible                                                                             |                                                                                                                                                                                                                                                                 |                                                                                                                                                                                                                                                                                                                         |   |                           |   |                         |   |                           |   |                     |   |                          |
| 4   | 4 = Very feasible                                                                                   |                                                                                                                                                                                                                                                                 |                                                                                                                                                                                                                                                                                                                         |   |                           |   |                         |   |                           |   |                     |   |                          |
| 5   | 5 = Extremely feasible                                                                              |                                                                                                                                                                                                                                                                 |                                                                                                                                                                                                                                                                                                                         |   |                           |   |                         |   |                           |   |                     |   |                          |
| 422 | <p>section_9_action_3_d</p> <p>Show the field ONLY if:<br/>[section_9_action_3_yes_no] = '1'</p>    | <p>D. How costly (in terms of staff time, equipment, and other) was changing bundle-related liability laws?</p>                                                                                                                                                 | <p>radio, Required</p> <table border="1"> <tr><td>1</td><td>1 =Not at all costly</td></tr> <tr><td>2</td><td>2 = Somewhat costly</td></tr> <tr><td>3</td><td>3 = Moderately costly</td></tr> <tr><td>4</td><td>4 = Very costly</td></tr> <tr><td>5</td><td>5 = Extremely costly</td></tr> </table>                      | 1 | 1 =Not at all costly      | 2 | 2 = Somewhat costly     | 3 | 3 = Moderately costly     | 4 | 4 = Very costly     | 5 | 5 = Extremely costly     |
| 1   | 1 =Not at all costly                                                                                |                                                                                                                                                                                                                                                                 |                                                                                                                                                                                                                                                                                                                         |   |                           |   |                         |   |                           |   |                     |   |                          |
| 2   | 2 = Somewhat costly                                                                                 |                                                                                                                                                                                                                                                                 |                                                                                                                                                                                                                                                                                                                         |   |                           |   |                         |   |                           |   |                     |   |                          |
| 3   | 3 = Moderately costly                                                                               |                                                                                                                                                                                                                                                                 |                                                                                                                                                                                                                                                                                                                         |   |                           |   |                         |   |                           |   |                     |   |                          |
| 4   | 4 = Very costly                                                                                     |                                                                                                                                                                                                                                                                 |                                                                                                                                                                                                                                                                                                                         |   |                           |   |                         |   |                           |   |                     |   |                          |
| 5   | 5 = Extremely costly                                                                                |                                                                                                                                                                                                                                                                 |                                                                                                                                                                                                                                                                                                                         |   |                           |   |                         |   |                           |   |                     |   |                          |
| 423 | <p>section_9_action_4_yes_no</p>                                                                    | <p>Action 4: Mandate change</p> <p>Q: Did leadership at your institution declare the ABCDEF bundle to be a priority and express their determination to have the bundle implemented?</p> <p>If action not used, mark "No" and go to next reflection question</p> | <p>yesno, Required</p> <table border="1"> <tr><td>1</td><td>Yes</td></tr> <tr><td>0</td><td>No</td></tr> </table> <p>Custom alignment: RH</p>                                                                                                                                                                           | 1 | Yes                       | 0 | No                      |   |                           |   |                     |   |                          |
| 1   | Yes                                                                                                 |                                                                                                                                                                                                                                                                 |                                                                                                                                                                                                                                                                                                                         |   |                           |   |                         |   |                           |   |                     |   |                          |
| 0   | No                                                                                                  |                                                                                                                                                                                                                                                                 |                                                                                                                                                                                                                                                                                                                         |   |                           |   |                         |   |                           |   |                     |   |                          |
| 424 | <p>section_9_action_4_text</p> <p>Show the field ONLY if:<br/>[section_9_action_4_yes_no] = '1'</p> | <p>When reflecting on your ICU's ABCDEF bundle implementation efforts:</p>                                                                                                                                                                                      | <p>descriptive</p>                                                                                                                                                                                                                                                                                                      |   |                           |   |                         |   |                           |   |                     |   |                          |



|     |                                                                                                     |                                                                                                                                                                                                                                                                                                                                                                                                                                                                                                                                                                                                |                                                                                                                                                                                                                                                                                                                         |   |                           |   |                         |   |                           |   |                     |   |                          |
|-----|-----------------------------------------------------------------------------------------------------|------------------------------------------------------------------------------------------------------------------------------------------------------------------------------------------------------------------------------------------------------------------------------------------------------------------------------------------------------------------------------------------------------------------------------------------------------------------------------------------------------------------------------------------------------------------------------------------------|-------------------------------------------------------------------------------------------------------------------------------------------------------------------------------------------------------------------------------------------------------------------------------------------------------------------------|---|---------------------------|---|-------------------------|---|---------------------------|---|---------------------|---|--------------------------|
| 425 | <p>section_9_action_4_a</p> <p>Show the field ONLY if:<br/>[section_9_action_4_yes_no] = '1'</p>    | <p>A. How helpful was mandating change for increasing bundle adoption?</p>                                                                                                                                                                                                                                                                                                                                                                                                                                                                                                                     | <p>radio, Required</p> <table border="1"> <tr><td>1</td><td>1 = Not at all helpful</td></tr> <tr><td>2</td><td>2 = Somewhat helpful</td></tr> <tr><td>3</td><td>3 = Moderately helpful</td></tr> <tr><td>4</td><td>4 = Very helpful</td></tr> <tr><td>5</td><td>5 = Extremely helpful</td></tr> </table>                | 1 | 1 = Not at all helpful    | 2 | 2 = Somewhat helpful    | 3 | 3 = Moderately helpful    | 4 | 4 = Very helpful    | 5 | 5 = Extremely helpful    |
| 1   | 1 = Not at all helpful                                                                              |                                                                                                                                                                                                                                                                                                                                                                                                                                                                                                                                                                                                |                                                                                                                                                                                                                                                                                                                         |   |                           |   |                         |   |                           |   |                     |   |                          |
| 2   | 2 = Somewhat helpful                                                                                |                                                                                                                                                                                                                                                                                                                                                                                                                                                                                                                                                                                                |                                                                                                                                                                                                                                                                                                                         |   |                           |   |                         |   |                           |   |                     |   |                          |
| 3   | 3 = Moderately helpful                                                                              |                                                                                                                                                                                                                                                                                                                                                                                                                                                                                                                                                                                                |                                                                                                                                                                                                                                                                                                                         |   |                           |   |                         |   |                           |   |                     |   |                          |
| 4   | 4 = Very helpful                                                                                    |                                                                                                                                                                                                                                                                                                                                                                                                                                                                                                                                                                                                |                                                                                                                                                                                                                                                                                                                         |   |                           |   |                         |   |                           |   |                     |   |                          |
| 5   | 5 = Extremely helpful                                                                               |                                                                                                                                                                                                                                                                                                                                                                                                                                                                                                                                                                                                |                                                                                                                                                                                                                                                                                                                         |   |                           |   |                         |   |                           |   |                     |   |                          |
| 426 | <p>section_9_action_4_b</p> <p>Show the field ONLY if:<br/>[section_9_action_4_yes_no] = '1'</p>    | <p>B. How acceptable was mandating bundle-related change among ICU team members?</p>                                                                                                                                                                                                                                                                                                                                                                                                                                                                                                           | <p>radio, Required</p> <table border="1"> <tr><td>1</td><td>1 = Not at all acceptable</td></tr> <tr><td>2</td><td>2 = Somewhat acceptable</td></tr> <tr><td>3</td><td>3 = Moderately acceptable</td></tr> <tr><td>4</td><td>4 = Very acceptable</td></tr> <tr><td>5</td><td>5 = Extremely acceptable</td></tr> </table> | 1 | 1 = Not at all acceptable | 2 | 2 = Somewhat acceptable | 3 | 3 = Moderately acceptable | 4 | 4 = Very acceptable | 5 | 5 = Extremely acceptable |
| 1   | 1 = Not at all acceptable                                                                           |                                                                                                                                                                                                                                                                                                                                                                                                                                                                                                                                                                                                |                                                                                                                                                                                                                                                                                                                         |   |                           |   |                         |   |                           |   |                     |   |                          |
| 2   | 2 = Somewhat acceptable                                                                             |                                                                                                                                                                                                                                                                                                                                                                                                                                                                                                                                                                                                |                                                                                                                                                                                                                                                                                                                         |   |                           |   |                         |   |                           |   |                     |   |                          |
| 3   | 3 = Moderately acceptable                                                                           |                                                                                                                                                                                                                                                                                                                                                                                                                                                                                                                                                                                                |                                                                                                                                                                                                                                                                                                                         |   |                           |   |                         |   |                           |   |                     |   |                          |
| 4   | 4 = Very acceptable                                                                                 |                                                                                                                                                                                                                                                                                                                                                                                                                                                                                                                                                                                                |                                                                                                                                                                                                                                                                                                                         |   |                           |   |                         |   |                           |   |                     |   |                          |
| 5   | 5 = Extremely acceptable                                                                            |                                                                                                                                                                                                                                                                                                                                                                                                                                                                                                                                                                                                |                                                                                                                                                                                                                                                                                                                         |   |                           |   |                         |   |                           |   |                     |   |                          |
| 427 | <p>section_9_action_4_c</p> <p>Show the field ONLY if:<br/>[section_9_action_4_yes_no] = '1'</p>    | <p>C. How feasible was it to mandate bundle-related change?</p>                                                                                                                                                                                                                                                                                                                                                                                                                                                                                                                                | <p>radio, Required</p> <table border="1"> <tr><td>1</td><td>1 = Not at all feasible</td></tr> <tr><td>2</td><td>2 = Somewhat feasible</td></tr> <tr><td>3</td><td>3 = Moderately feasible</td></tr> <tr><td>4</td><td>4 = Very feasible</td></tr> <tr><td>5</td><td>5 = Extremely feasible</td></tr> </table>           | 1 | 1 = Not at all feasible   | 2 | 2 = Somewhat feasible   | 3 | 3 = Moderately feasible   | 4 | 4 = Very feasible   | 5 | 5 = Extremely feasible   |
| 1   | 1 = Not at all feasible                                                                             |                                                                                                                                                                                                                                                                                                                                                                                                                                                                                                                                                                                                |                                                                                                                                                                                                                                                                                                                         |   |                           |   |                         |   |                           |   |                     |   |                          |
| 2   | 2 = Somewhat feasible                                                                               |                                                                                                                                                                                                                                                                                                                                                                                                                                                                                                                                                                                                |                                                                                                                                                                                                                                                                                                                         |   |                           |   |                         |   |                           |   |                     |   |                          |
| 3   | 3 = Moderately feasible                                                                             |                                                                                                                                                                                                                                                                                                                                                                                                                                                                                                                                                                                                |                                                                                                                                                                                                                                                                                                                         |   |                           |   |                         |   |                           |   |                     |   |                          |
| 4   | 4 = Very feasible                                                                                   |                                                                                                                                                                                                                                                                                                                                                                                                                                                                                                                                                                                                |                                                                                                                                                                                                                                                                                                                         |   |                           |   |                         |   |                           |   |                     |   |                          |
| 5   | 5 = Extremely feasible                                                                              |                                                                                                                                                                                                                                                                                                                                                                                                                                                                                                                                                                                                |                                                                                                                                                                                                                                                                                                                         |   |                           |   |                         |   |                           |   |                     |   |                          |
| 428 | <p>section_9_action_4_d</p> <p>Show the field ONLY if:<br/>[section_9_action_4_yes_no] = '1'</p>    | <p>D. How costly (in terms of staff time, equipment, and other) was mandating bundle-related change?</p>                                                                                                                                                                                                                                                                                                                                                                                                                                                                                       | <p>radio, Required</p> <table border="1"> <tr><td>1</td><td>1 =Not at all costly</td></tr> <tr><td>2</td><td>2 = Somewhat costly</td></tr> <tr><td>3</td><td>3 = Moderately costly</td></tr> <tr><td>4</td><td>4 = Very costly</td></tr> <tr><td>5</td><td>5 = Extremely costly</td></tr> </table>                      | 1 | 1 =Not at all costly      | 2 | 2 = Somewhat costly     | 3 | 3 = Moderately costly     | 4 | 4 = Very costly     | 5 | 5 = Extremely costly     |
| 1   | 1 =Not at all costly                                                                                |                                                                                                                                                                                                                                                                                                                                                                                                                                                                                                                                                                                                |                                                                                                                                                                                                                                                                                                                         |   |                           |   |                         |   |                           |   |                     |   |                          |
| 2   | 2 = Somewhat costly                                                                                 |                                                                                                                                                                                                                                                                                                                                                                                                                                                                                                                                                                                                |                                                                                                                                                                                                                                                                                                                         |   |                           |   |                         |   |                           |   |                     |   |                          |
| 3   | 3 = Moderately costly                                                                               |                                                                                                                                                                                                                                                                                                                                                                                                                                                                                                                                                                                                |                                                                                                                                                                                                                                                                                                                         |   |                           |   |                         |   |                           |   |                     |   |                          |
| 4   | 4 = Very costly                                                                                     |                                                                                                                                                                                                                                                                                                                                                                                                                                                                                                                                                                                                |                                                                                                                                                                                                                                                                                                                         |   |                           |   |                         |   |                           |   |                     |   |                          |
| 5   | 5 = Extremely costly                                                                                |                                                                                                                                                                                                                                                                                                                                                                                                                                                                                                                                                                                                |                                                                                                                                                                                                                                                                                                                         |   |                           |   |                         |   |                           |   |                     |   |                          |
| 429 | <p>section_9_action_5_yes_no</p>                                                                    | <p>Action 5: Create or change credentialing and/or licensing standards</p> <p>Q: Did your institution create an organization that certifies clinicians in the ABCDEF bundle or encourage an existing organization to do so? Did your institution work to alter continuing education requirements to shape professional practice toward ABCDEF bundle adoption? Did your institution work to change governmental (state/federal) professional certification or licensure requirements to include the ABCDEF bundle?</p> <p>If action not used, mark "No" and go to next reflection question</p> | <p>yesno, Required</p> <table border="1"> <tr><td>1</td><td>Yes</td></tr> <tr><td>0</td><td>No</td></tr> </table> <p>Custom alignment: RH</p>                                                                                                                                                                           | 1 | Yes                       | 0 | No                      |   |                           |   |                     |   |                          |
| 1   | Yes                                                                                                 |                                                                                                                                                                                                                                                                                                                                                                                                                                                                                                                                                                                                |                                                                                                                                                                                                                                                                                                                         |   |                           |   |                         |   |                           |   |                     |   |                          |
| 0   | No                                                                                                  |                                                                                                                                                                                                                                                                                                                                                                                                                                                                                                                                                                                                |                                                                                                                                                                                                                                                                                                                         |   |                           |   |                         |   |                           |   |                     |   |                          |
| 430 | <p>section_9_action_5_text</p> <p>Show the field ONLY if:<br/>[section_9_action_5_yes_no] = '1'</p> | <p>When reflecting on your ICU's ABCDEF bundle implementation efforts:</p>                                                                                                                                                                                                                                                                                                                                                                                                                                                                                                                     | <p>descriptive</p>                                                                                                                                                                                                                                                                                                      |   |                           |   |                         |   |                           |   |                     |   |                          |
| 431 | <p>section_9_action_5_a</p> <p>Show the field ONLY if:<br/>[section_9_action_5_yes_no] = '1'</p>    | <p>A. How helpful was creating or changing credentialing and/or licensing standards for increasing bundle adoption?</p>                                                                                                                                                                                                                                                                                                                                                                                                                                                                        | <p>radio, Required</p> <table border="1"> <tr><td>1</td><td>1 = Not at all helpful</td></tr> <tr><td>2</td><td>2 = Somewhat helpful</td></tr> <tr><td>3</td><td>3 = Moderately helpful</td></tr> <tr><td>4</td><td>4 = Very helpful</td></tr> <tr><td>5</td><td>5 = Extremely helpful</td></tr> </table>                | 1 | 1 = Not at all helpful    | 2 | 2 = Somewhat helpful    | 3 | 3 = Moderately helpful    | 4 | 4 = Very helpful    | 5 | 5 = Extremely helpful    |
| 1   | 1 = Not at all helpful                                                                              |                                                                                                                                                                                                                                                                                                                                                                                                                                                                                                                                                                                                |                                                                                                                                                                                                                                                                                                                         |   |                           |   |                         |   |                           |   |                     |   |                          |
| 2   | 2 = Somewhat helpful                                                                                |                                                                                                                                                                                                                                                                                                                                                                                                                                                                                                                                                                                                |                                                                                                                                                                                                                                                                                                                         |   |                           |   |                         |   |                           |   |                     |   |                          |
| 3   | 3 = Moderately helpful                                                                              |                                                                                                                                                                                                                                                                                                                                                                                                                                                                                                                                                                                                |                                                                                                                                                                                                                                                                                                                         |   |                           |   |                         |   |                           |   |                     |   |                          |
| 4   | 4 = Very helpful                                                                                    |                                                                                                                                                                                                                                                                                                                                                                                                                                                                                                                                                                                                |                                                                                                                                                                                                                                                                                                                         |   |                           |   |                         |   |                           |   |                     |   |                          |
| 5   | 5 = Extremely helpful                                                                               |                                                                                                                                                                                                                                                                                                                                                                                                                                                                                                                                                                                                |                                                                                                                                                                                                                                                                                                                         |   |                           |   |                         |   |                           |   |                     |   |                          |
| 432 | <p>section_9_action_5_b</p> <p>Show the field ONLY if:<br/>[section_9_action_5_yes_no] = '1'</p>    | <p>B. How acceptable was creating or changing bundle-related credentialing and/or licensing standards among ICU team members?</p>                                                                                                                                                                                                                                                                                                                                                                                                                                                              | <p>radio, Required</p> <table border="1"> <tr><td>1</td><td>1 = Not at all acceptable</td></tr> <tr><td>2</td><td>2 = Somewhat acceptable</td></tr> <tr><td>3</td><td>3 = Moderately acceptable</td></tr> <tr><td>4</td><td>4 = Very acceptable</td></tr> <tr><td>5</td><td>5 = Extremely acceptable</td></tr> </table> | 1 | 1 = Not at all acceptable | 2 | 2 = Somewhat acceptable | 3 | 3 = Moderately acceptable | 4 | 4 = Very acceptable | 5 | 5 = Extremely acceptable |
| 1   | 1 = Not at all acceptable                                                                           |                                                                                                                                                                                                                                                                                                                                                                                                                                                                                                                                                                                                |                                                                                                                                                                                                                                                                                                                         |   |                           |   |                         |   |                           |   |                     |   |                          |
| 2   | 2 = Somewhat acceptable                                                                             |                                                                                                                                                                                                                                                                                                                                                                                                                                                                                                                                                                                                |                                                                                                                                                                                                                                                                                                                         |   |                           |   |                         |   |                           |   |                     |   |                          |
| 3   | 3 = Moderately acceptable                                                                           |                                                                                                                                                                                                                                                                                                                                                                                                                                                                                                                                                                                                |                                                                                                                                                                                                                                                                                                                         |   |                           |   |                         |   |                           |   |                     |   |                          |
| 4   | 4 = Very acceptable                                                                                 |                                                                                                                                                                                                                                                                                                                                                                                                                                                                                                                                                                                                |                                                                                                                                                                                                                                                                                                                         |   |                           |   |                         |   |                           |   |                     |   |                          |
| 5   | 5 = Extremely acceptable                                                                            |                                                                                                                                                                                                                                                                                                                                                                                                                                                                                                                                                                                                |                                                                                                                                                                                                                                                                                                                         |   |                           |   |                         |   |                           |   |                     |   |                          |

|     |                                                                                                     |                                                                                                                                                                                                                                                                                                                                                                                                                                                                   |                                                                                                                                                                                                                                                                                                                         |   |                           |   |                         |   |                           |   |                     |   |                          |
|-----|-----------------------------------------------------------------------------------------------------|-------------------------------------------------------------------------------------------------------------------------------------------------------------------------------------------------------------------------------------------------------------------------------------------------------------------------------------------------------------------------------------------------------------------------------------------------------------------|-------------------------------------------------------------------------------------------------------------------------------------------------------------------------------------------------------------------------------------------------------------------------------------------------------------------------|---|---------------------------|---|-------------------------|---|---------------------------|---|---------------------|---|--------------------------|
| 433 | <p>section_9_action_5_c</p> <p>Show the field ONLY if:<br/>[section_9_action_5_yes_no] = '1'</p>    | <p>C. How feasible was it to create or change bundle-related credentialing and/or licensing standards?</p>                                                                                                                                                                                                                                                                                                                                                        | <p>radio, Required</p> <table border="1"> <tr><td>1</td><td>1 = Not at all feasible</td></tr> <tr><td>2</td><td>2 = Somewhat feasible</td></tr> <tr><td>3</td><td>3 = Moderately feasible</td></tr> <tr><td>4</td><td>4 = Very feasible</td></tr> <tr><td>5</td><td>5 = Extremely feasible</td></tr> </table>           | 1 | 1 = Not at all feasible   | 2 | 2 = Somewhat feasible   | 3 | 3 = Moderately feasible   | 4 | 4 = Very feasible   | 5 | 5 = Extremely feasible   |
| 1   | 1 = Not at all feasible                                                                             |                                                                                                                                                                                                                                                                                                                                                                                                                                                                   |                                                                                                                                                                                                                                                                                                                         |   |                           |   |                         |   |                           |   |                     |   |                          |
| 2   | 2 = Somewhat feasible                                                                               |                                                                                                                                                                                                                                                                                                                                                                                                                                                                   |                                                                                                                                                                                                                                                                                                                         |   |                           |   |                         |   |                           |   |                     |   |                          |
| 3   | 3 = Moderately feasible                                                                             |                                                                                                                                                                                                                                                                                                                                                                                                                                                                   |                                                                                                                                                                                                                                                                                                                         |   |                           |   |                         |   |                           |   |                     |   |                          |
| 4   | 4 = Very feasible                                                                                   |                                                                                                                                                                                                                                                                                                                                                                                                                                                                   |                                                                                                                                                                                                                                                                                                                         |   |                           |   |                         |   |                           |   |                     |   |                          |
| 5   | 5 = Extremely feasible                                                                              |                                                                                                                                                                                                                                                                                                                                                                                                                                                                   |                                                                                                                                                                                                                                                                                                                         |   |                           |   |                         |   |                           |   |                     |   |                          |
| 434 | <p>section_9_action_5_d</p> <p>Show the field ONLY if:<br/>[section_9_action_5_yes_no] = '1'</p>    | <p>D. How costly (in terms of staff time, equipment, and other) was creating or changing bundle-related credentialing and/or licensing standards?</p>                                                                                                                                                                                                                                                                                                             | <p>radio, Required</p> <table border="1"> <tr><td>1</td><td>1 =Not at all costly</td></tr> <tr><td>2</td><td>2 = Somewhat costly</td></tr> <tr><td>3</td><td>3 = Moderately costly</td></tr> <tr><td>4</td><td>4 = Very costly</td></tr> <tr><td>5</td><td>5 = Extremely costly</td></tr> </table>                      | 1 | 1 =Not at all costly      | 2 | 2 = Somewhat costly     | 3 | 3 = Moderately costly     | 4 | 4 = Very costly     | 5 | 5 = Extremely costly     |
| 1   | 1 =Not at all costly                                                                                |                                                                                                                                                                                                                                                                                                                                                                                                                                                                   |                                                                                                                                                                                                                                                                                                                         |   |                           |   |                         |   |                           |   |                     |   |                          |
| 2   | 2 = Somewhat costly                                                                                 |                                                                                                                                                                                                                                                                                                                                                                                                                                                                   |                                                                                                                                                                                                                                                                                                                         |   |                           |   |                         |   |                           |   |                     |   |                          |
| 3   | 3 = Moderately costly                                                                               |                                                                                                                                                                                                                                                                                                                                                                                                                                                                   |                                                                                                                                                                                                                                                                                                                         |   |                           |   |                         |   |                           |   |                     |   |                          |
| 4   | 4 = Very costly                                                                                     |                                                                                                                                                                                                                                                                                                                                                                                                                                                                   |                                                                                                                                                                                                                                                                                                                         |   |                           |   |                         |   |                           |   |                     |   |                          |
| 5   | 5 = Extremely costly                                                                                |                                                                                                                                                                                                                                                                                                                                                                                                                                                                   |                                                                                                                                                                                                                                                                                                                         |   |                           |   |                         |   |                           |   |                     |   |                          |
| 435 | <p>section_9_action_6_yes_no</p>                                                                    | <p>Action 6: Change accreditation or membership requirements</p> <p>Q: Did your institution strive to alter accreditation standards so that they require or encourage use of the ABCDEF bundle? Did the institution work to alter membership organization requirements so that those who want to affiliate with the organization are encouraged or required to use the ABCDEF bundle?</p> <p>If action not used, mark "No" and go to next reflection question</p> | <p>yesno, Required</p> <table border="1"> <tr><td>1</td><td>Yes</td></tr> <tr><td>0</td><td>No</td></tr> </table> <p>Custom alignment: RH</p>                                                                                                                                                                           | 1 | Yes                       | 0 | No                      |   |                           |   |                     |   |                          |
| 1   | Yes                                                                                                 |                                                                                                                                                                                                                                                                                                                                                                                                                                                                   |                                                                                                                                                                                                                                                                                                                         |   |                           |   |                         |   |                           |   |                     |   |                          |
| 0   | No                                                                                                  |                                                                                                                                                                                                                                                                                                                                                                                                                                                                   |                                                                                                                                                                                                                                                                                                                         |   |                           |   |                         |   |                           |   |                     |   |                          |
| 436 | <p>section_9_action_6_text</p> <p>Show the field ONLY if:<br/>[section_9_action_6_yes_no] = '1'</p> | <p>When reflecting on your ICU's ABCDEF bundle implementation efforts:</p>                                                                                                                                                                                                                                                                                                                                                                                        | <p>descriptive</p>                                                                                                                                                                                                                                                                                                      |   |                           |   |                         |   |                           |   |                     |   |                          |
| 437 | <p>section_9_action_6_a</p> <p>Show the field ONLY if:<br/>[section_9_action_6_yes_no] = '1'</p>    | <p>A. How helpful was changing accreditation or membership requirements for increasing bundle adoption?</p>                                                                                                                                                                                                                                                                                                                                                       | <p>radio, Required</p> <table border="1"> <tr><td>1</td><td>1 = Not at all helpful</td></tr> <tr><td>2</td><td>2 = Somewhat helpful</td></tr> <tr><td>3</td><td>3 = Moderately helpful</td></tr> <tr><td>4</td><td>4 = Very helpful</td></tr> <tr><td>5</td><td>5 = Extremely helpful</td></tr> </table>                | 1 | 1 = Not at all helpful    | 2 | 2 = Somewhat helpful    | 3 | 3 = Moderately helpful    | 4 | 4 = Very helpful    | 5 | 5 = Extremely helpful    |
| 1   | 1 = Not at all helpful                                                                              |                                                                                                                                                                                                                                                                                                                                                                                                                                                                   |                                                                                                                                                                                                                                                                                                                         |   |                           |   |                         |   |                           |   |                     |   |                          |
| 2   | 2 = Somewhat helpful                                                                                |                                                                                                                                                                                                                                                                                                                                                                                                                                                                   |                                                                                                                                                                                                                                                                                                                         |   |                           |   |                         |   |                           |   |                     |   |                          |
| 3   | 3 = Moderately helpful                                                                              |                                                                                                                                                                                                                                                                                                                                                                                                                                                                   |                                                                                                                                                                                                                                                                                                                         |   |                           |   |                         |   |                           |   |                     |   |                          |
| 4   | 4 = Very helpful                                                                                    |                                                                                                                                                                                                                                                                                                                                                                                                                                                                   |                                                                                                                                                                                                                                                                                                                         |   |                           |   |                         |   |                           |   |                     |   |                          |
| 5   | 5 = Extremely helpful                                                                               |                                                                                                                                                                                                                                                                                                                                                                                                                                                                   |                                                                                                                                                                                                                                                                                                                         |   |                           |   |                         |   |                           |   |                     |   |                          |
| 438 | <p>section_9_action_6_b</p> <p>Show the field ONLY if:<br/>[section_9_action_6_yes_no] = '1'</p>    | <p>B. How acceptable was changing bundle-related accreditation or membership requirements among ICU team members?</p>                                                                                                                                                                                                                                                                                                                                             | <p>radio, Required</p> <table border="1"> <tr><td>1</td><td>1 = Not at all acceptable</td></tr> <tr><td>2</td><td>2 = Somewhat acceptable</td></tr> <tr><td>3</td><td>3 = Moderately acceptable</td></tr> <tr><td>4</td><td>4 = Very acceptable</td></tr> <tr><td>5</td><td>5 = Extremely acceptable</td></tr> </table> | 1 | 1 = Not at all acceptable | 2 | 2 = Somewhat acceptable | 3 | 3 = Moderately acceptable | 4 | 4 = Very acceptable | 5 | 5 = Extremely acceptable |
| 1   | 1 = Not at all acceptable                                                                           |                                                                                                                                                                                                                                                                                                                                                                                                                                                                   |                                                                                                                                                                                                                                                                                                                         |   |                           |   |                         |   |                           |   |                     |   |                          |
| 2   | 2 = Somewhat acceptable                                                                             |                                                                                                                                                                                                                                                                                                                                                                                                                                                                   |                                                                                                                                                                                                                                                                                                                         |   |                           |   |                         |   |                           |   |                     |   |                          |
| 3   | 3 = Moderately acceptable                                                                           |                                                                                                                                                                                                                                                                                                                                                                                                                                                                   |                                                                                                                                                                                                                                                                                                                         |   |                           |   |                         |   |                           |   |                     |   |                          |
| 4   | 4 = Very acceptable                                                                                 |                                                                                                                                                                                                                                                                                                                                                                                                                                                                   |                                                                                                                                                                                                                                                                                                                         |   |                           |   |                         |   |                           |   |                     |   |                          |
| 5   | 5 = Extremely acceptable                                                                            |                                                                                                                                                                                                                                                                                                                                                                                                                                                                   |                                                                                                                                                                                                                                                                                                                         |   |                           |   |                         |   |                           |   |                     |   |                          |
| 439 | <p>section_9_action_6_c</p> <p>Show the field ONLY if:<br/>[section_9_action_6_yes_no] = '1'</p>    | <p>C. How feasible was it to change bundle-related accreditation or membership requirements?</p>                                                                                                                                                                                                                                                                                                                                                                  | <p>radio, Required</p> <table border="1"> <tr><td>1</td><td>1 = Not at all feasible</td></tr> <tr><td>2</td><td>2 = Somewhat feasible</td></tr> <tr><td>3</td><td>3 = Moderately feasible</td></tr> <tr><td>4</td><td>4 = Very feasible</td></tr> <tr><td>5</td><td>5 = Extremely feasible</td></tr> </table>           | 1 | 1 = Not at all feasible   | 2 | 2 = Somewhat feasible   | 3 | 3 = Moderately feasible   | 4 | 4 = Very feasible   | 5 | 5 = Extremely feasible   |
| 1   | 1 = Not at all feasible                                                                             |                                                                                                                                                                                                                                                                                                                                                                                                                                                                   |                                                                                                                                                                                                                                                                                                                         |   |                           |   |                         |   |                           |   |                     |   |                          |
| 2   | 2 = Somewhat feasible                                                                               |                                                                                                                                                                                                                                                                                                                                                                                                                                                                   |                                                                                                                                                                                                                                                                                                                         |   |                           |   |                         |   |                           |   |                     |   |                          |
| 3   | 3 = Moderately feasible                                                                             |                                                                                                                                                                                                                                                                                                                                                                                                                                                                   |                                                                                                                                                                                                                                                                                                                         |   |                           |   |                         |   |                           |   |                     |   |                          |
| 4   | 4 = Very feasible                                                                                   |                                                                                                                                                                                                                                                                                                                                                                                                                                                                   |                                                                                                                                                                                                                                                                                                                         |   |                           |   |                         |   |                           |   |                     |   |                          |
| 5   | 5 = Extremely feasible                                                                              |                                                                                                                                                                                                                                                                                                                                                                                                                                                                   |                                                                                                                                                                                                                                                                                                                         |   |                           |   |                         |   |                           |   |                     |   |                          |
| 440 | <p>section_9_action_6_d</p> <p>Show the field ONLY if:<br/>[section_9_action_6_yes_no] = '1'</p>    | <p>D. How costly (in terms of staff time, equipment, and other) was changing bundle-related accreditation or membership requirements?</p>                                                                                                                                                                                                                                                                                                                         | <p>radio, Required</p> <table border="1"> <tr><td>1</td><td>1 =Not at all costly</td></tr> <tr><td>2</td><td>2 = Somewhat costly</td></tr> <tr><td>3</td><td>3 = Moderately costly</td></tr> <tr><td>4</td><td>4 = Very costly</td></tr> <tr><td>5</td><td>5 = Extremely costly</td></tr> </table>                      | 1 | 1 =Not at all costly      | 2 | 2 = Somewhat costly     | 3 | 3 = Moderately costly     | 4 | 4 = Very costly     | 5 | 5 = Extremely costly     |
| 1   | 1 =Not at all costly                                                                                |                                                                                                                                                                                                                                                                                                                                                                                                                                                                   |                                                                                                                                                                                                                                                                                                                         |   |                           |   |                         |   |                           |   |                     |   |                          |
| 2   | 2 = Somewhat costly                                                                                 |                                                                                                                                                                                                                                                                                                                                                                                                                                                                   |                                                                                                                                                                                                                                                                                                                         |   |                           |   |                         |   |                           |   |                     |   |                          |
| 3   | 3 = Moderately costly                                                                               |                                                                                                                                                                                                                                                                                                                                                                                                                                                                   |                                                                                                                                                                                                                                                                                                                         |   |                           |   |                         |   |                           |   |                     |   |                          |
| 4   | 4 = Very costly                                                                                     |                                                                                                                                                                                                                                                                                                                                                                                                                                                                   |                                                                                                                                                                                                                                                                                                                         |   |                           |   |                         |   |                           |   |                     |   |                          |
| 5   | 5 = Extremely costly                                                                                |                                                                                                                                                                                                                                                                                                                                                                                                                                                                   |                                                                                                                                                                                                                                                                                                                         |   |                           |   |                         |   |                           |   |                     |   |                          |
| 441 | <p>section_9_action_7_yes_no</p>                                                                    | <p>Action 7: Change record systems</p> <p>Q: Did your institution change records systems to allow better assessment of implementation or clinical outcomes related to the ABCDEF bundle?</p> <p>If action not used, mark "No" and go to next reflection question</p>                                                                                                                                                                                              | <p>yesno, Required</p> <table border="1"> <tr><td>1</td><td>Yes</td></tr> <tr><td>0</td><td>No</td></tr> </table> <p>Custom alignment: RH</p>                                                                                                                                                                           | 1 | Yes                       | 0 | No                      |   |                           |   |                     |   |                          |
| 1   | Yes                                                                                                 |                                                                                                                                                                                                                                                                                                                                                                                                                                                                   |                                                                                                                                                                                                                                                                                                                         |   |                           |   |                         |   |                           |   |                     |   |                          |
| 0   | No                                                                                                  |                                                                                                                                                                                                                                                                                                                                                                                                                                                                   |                                                                                                                                                                                                                                                                                                                         |   |                           |   |                         |   |                           |   |                     |   |                          |

|     |                                                                                                     |                                                                                                                                                                                                                              |                                                                                                                                                                                                                                                                                                                         |   |                           |   |                         |   |                           |   |                     |   |                          |
|-----|-----------------------------------------------------------------------------------------------------|------------------------------------------------------------------------------------------------------------------------------------------------------------------------------------------------------------------------------|-------------------------------------------------------------------------------------------------------------------------------------------------------------------------------------------------------------------------------------------------------------------------------------------------------------------------|---|---------------------------|---|-------------------------|---|---------------------------|---|---------------------|---|--------------------------|
| 442 | <p>section_9_action_7_text</p> <p>Show the field ONLY if:<br/>[section_9_action_7_yes_no] = '1'</p> | <p>When reflecting on your ICU's ABCDEF bundle implementation efforts:</p>                                                                                                                                                   | <p>descriptive</p>                                                                                                                                                                                                                                                                                                      |   |                           |   |                         |   |                           |   |                     |   |                          |
| 443 | <p>section_9_action_7_a</p> <p>Show the field ONLY if:<br/>[section_9_action_7_yes_no] = '1'</p>    | <p>A. How helpful was changing record systems for increasing bundle adoption?</p>                                                                                                                                            | <p>radio, Required</p> <table border="1"> <tr><td>1</td><td>1 = Not at all helpful</td></tr> <tr><td>2</td><td>2 = Somewhat helpful</td></tr> <tr><td>3</td><td>3 = Moderately helpful</td></tr> <tr><td>4</td><td>4 = Very helpful</td></tr> <tr><td>5</td><td>5 = Extremely helpful</td></tr> </table>                | 1 | 1 = Not at all helpful    | 2 | 2 = Somewhat helpful    | 3 | 3 = Moderately helpful    | 4 | 4 = Very helpful    | 5 | 5 = Extremely helpful    |
| 1   | 1 = Not at all helpful                                                                              |                                                                                                                                                                                                                              |                                                                                                                                                                                                                                                                                                                         |   |                           |   |                         |   |                           |   |                     |   |                          |
| 2   | 2 = Somewhat helpful                                                                                |                                                                                                                                                                                                                              |                                                                                                                                                                                                                                                                                                                         |   |                           |   |                         |   |                           |   |                     |   |                          |
| 3   | 3 = Moderately helpful                                                                              |                                                                                                                                                                                                                              |                                                                                                                                                                                                                                                                                                                         |   |                           |   |                         |   |                           |   |                     |   |                          |
| 4   | 4 = Very helpful                                                                                    |                                                                                                                                                                                                                              |                                                                                                                                                                                                                                                                                                                         |   |                           |   |                         |   |                           |   |                     |   |                          |
| 5   | 5 = Extremely helpful                                                                               |                                                                                                                                                                                                                              |                                                                                                                                                                                                                                                                                                                         |   |                           |   |                         |   |                           |   |                     |   |                          |
| 444 | <p>section_9_action_7_b</p> <p>Show the field ONLY if:<br/>[section_9_action_7_yes_no] = '1'</p>    | <p>B. How acceptable was changing record systems related to the bundle among ICU team members?</p>                                                                                                                           | <p>radio, Required</p> <table border="1"> <tr><td>1</td><td>1 = Not at all acceptable</td></tr> <tr><td>2</td><td>2 = Somewhat acceptable</td></tr> <tr><td>3</td><td>3 = Moderately acceptable</td></tr> <tr><td>4</td><td>4 = Very acceptable</td></tr> <tr><td>5</td><td>5 = Extremely acceptable</td></tr> </table> | 1 | 1 = Not at all acceptable | 2 | 2 = Somewhat acceptable | 3 | 3 = Moderately acceptable | 4 | 4 = Very acceptable | 5 | 5 = Extremely acceptable |
| 1   | 1 = Not at all acceptable                                                                           |                                                                                                                                                                                                                              |                                                                                                                                                                                                                                                                                                                         |   |                           |   |                         |   |                           |   |                     |   |                          |
| 2   | 2 = Somewhat acceptable                                                                             |                                                                                                                                                                                                                              |                                                                                                                                                                                                                                                                                                                         |   |                           |   |                         |   |                           |   |                     |   |                          |
| 3   | 3 = Moderately acceptable                                                                           |                                                                                                                                                                                                                              |                                                                                                                                                                                                                                                                                                                         |   |                           |   |                         |   |                           |   |                     |   |                          |
| 4   | 4 = Very acceptable                                                                                 |                                                                                                                                                                                                                              |                                                                                                                                                                                                                                                                                                                         |   |                           |   |                         |   |                           |   |                     |   |                          |
| 5   | 5 = Extremely acceptable                                                                            |                                                                                                                                                                                                                              |                                                                                                                                                                                                                                                                                                                         |   |                           |   |                         |   |                           |   |                     |   |                          |
| 445 | <p>section_9_action_7_c</p> <p>Show the field ONLY if:<br/>[section_9_action_7_yes_no] = '1'</p>    | <p>C. How feasible was it to change record systems related to the bundle?</p>                                                                                                                                                | <p>radio, Required</p> <table border="1"> <tr><td>1</td><td>1 = Not at all feasible</td></tr> <tr><td>2</td><td>2 = Somewhat feasible</td></tr> <tr><td>3</td><td>3 = Moderately feasible</td></tr> <tr><td>4</td><td>4 = Very feasible</td></tr> <tr><td>5</td><td>5 = Extremely feasible</td></tr> </table>           | 1 | 1 = Not at all feasible   | 2 | 2 = Somewhat feasible   | 3 | 3 = Moderately feasible   | 4 | 4 = Very feasible   | 5 | 5 = Extremely feasible   |
| 1   | 1 = Not at all feasible                                                                             |                                                                                                                                                                                                                              |                                                                                                                                                                                                                                                                                                                         |   |                           |   |                         |   |                           |   |                     |   |                          |
| 2   | 2 = Somewhat feasible                                                                               |                                                                                                                                                                                                                              |                                                                                                                                                                                                                                                                                                                         |   |                           |   |                         |   |                           |   |                     |   |                          |
| 3   | 3 = Moderately feasible                                                                             |                                                                                                                                                                                                                              |                                                                                                                                                                                                                                                                                                                         |   |                           |   |                         |   |                           |   |                     |   |                          |
| 4   | 4 = Very feasible                                                                                   |                                                                                                                                                                                                                              |                                                                                                                                                                                                                                                                                                                         |   |                           |   |                         |   |                           |   |                     |   |                          |
| 5   | 5 = Extremely feasible                                                                              |                                                                                                                                                                                                                              |                                                                                                                                                                                                                                                                                                                         |   |                           |   |                         |   |                           |   |                     |   |                          |
| 446 | <p>section_9_action_7_d</p> <p>Show the field ONLY if:<br/>[section_9_action_7_yes_no] = '1'</p>    | <p>D. How costly (in terms of staff time, equipment, and other) was changing record systems related to the bundle?</p>                                                                                                       | <p>radio, Required</p> <table border="1"> <tr><td>1</td><td>1 =Not at all costly</td></tr> <tr><td>2</td><td>2 = Somewhat costly</td></tr> <tr><td>3</td><td>3 = Moderately costly</td></tr> <tr><td>4</td><td>4 = Very costly</td></tr> <tr><td>5</td><td>5 = Extremely costly</td></tr> </table>                      | 1 | 1 =Not at all costly      | 2 | 2 = Somewhat costly     | 3 | 3 = Moderately costly     | 4 | 4 = Very costly     | 5 | 5 = Extremely costly     |
| 1   | 1 =Not at all costly                                                                                |                                                                                                                                                                                                                              |                                                                                                                                                                                                                                                                                                                         |   |                           |   |                         |   |                           |   |                     |   |                          |
| 2   | 2 = Somewhat costly                                                                                 |                                                                                                                                                                                                                              |                                                                                                                                                                                                                                                                                                                         |   |                           |   |                         |   |                           |   |                     |   |                          |
| 3   | 3 = Moderately costly                                                                               |                                                                                                                                                                                                                              |                                                                                                                                                                                                                                                                                                                         |   |                           |   |                         |   |                           |   |                     |   |                          |
| 4   | 4 = Very costly                                                                                     |                                                                                                                                                                                                                              |                                                                                                                                                                                                                                                                                                                         |   |                           |   |                         |   |                           |   |                     |   |                          |
| 5   | 5 = Extremely costly                                                                                |                                                                                                                                                                                                                              |                                                                                                                                                                                                                                                                                                                         |   |                           |   |                         |   |                           |   |                     |   |                          |
| 447 | <p>section_9_action_8_yes_no</p>                                                                    | <p>Action 8: Change service sites</p> <p>Q: Did your institution change the location of clinical service sites to increase ABCDEF bundle access?</p> <p>If action not used, mark "No" and go to next reflection question</p> | <p>yesno, Required</p> <table border="1"> <tr><td>1</td><td>Yes</td></tr> <tr><td>0</td><td>No</td></tr> </table> <p>Custom alignment: RH</p>                                                                                                                                                                           | 1 | Yes                       | 0 | No                      |   |                           |   |                     |   |                          |
| 1   | Yes                                                                                                 |                                                                                                                                                                                                                              |                                                                                                                                                                                                                                                                                                                         |   |                           |   |                         |   |                           |   |                     |   |                          |
| 0   | No                                                                                                  |                                                                                                                                                                                                                              |                                                                                                                                                                                                                                                                                                                         |   |                           |   |                         |   |                           |   |                     |   |                          |
| 448 | <p>section_9_action_8_text</p> <p>Show the field ONLY if:<br/>[section_9_action_8_yes_no] = '1'</p> | <p>When reflecting on your ICU's ABCDEF bundle implementation efforts:</p>                                                                                                                                                   | <p>descriptive</p>                                                                                                                                                                                                                                                                                                      |   |                           |   |                         |   |                           |   |                     |   |                          |
| 449 | <p>section_9_action_8_a</p> <p>Show the field ONLY if:<br/>[section_9_action_8_yes_no] = '1'</p>    | <p>A. How helpful was changing service sites for increasing bundle adoption?</p>                                                                                                                                             | <p>radio, Required</p> <table border="1"> <tr><td>1</td><td>1 = Not at all helpful</td></tr> <tr><td>2</td><td>2 = Somewhat helpful</td></tr> <tr><td>3</td><td>3 = Moderately helpful</td></tr> <tr><td>4</td><td>4 = Very helpful</td></tr> <tr><td>5</td><td>5 = Extremely helpful</td></tr> </table>                | 1 | 1 = Not at all helpful    | 2 | 2 = Somewhat helpful    | 3 | 3 = Moderately helpful    | 4 | 4 = Very helpful    | 5 | 5 = Extremely helpful    |
| 1   | 1 = Not at all helpful                                                                              |                                                                                                                                                                                                                              |                                                                                                                                                                                                                                                                                                                         |   |                           |   |                         |   |                           |   |                     |   |                          |
| 2   | 2 = Somewhat helpful                                                                                |                                                                                                                                                                                                                              |                                                                                                                                                                                                                                                                                                                         |   |                           |   |                         |   |                           |   |                     |   |                          |
| 3   | 3 = Moderately helpful                                                                              |                                                                                                                                                                                                                              |                                                                                                                                                                                                                                                                                                                         |   |                           |   |                         |   |                           |   |                     |   |                          |
| 4   | 4 = Very helpful                                                                                    |                                                                                                                                                                                                                              |                                                                                                                                                                                                                                                                                                                         |   |                           |   |                         |   |                           |   |                     |   |                          |
| 5   | 5 = Extremely helpful                                                                               |                                                                                                                                                                                                                              |                                                                                                                                                                                                                                                                                                                         |   |                           |   |                         |   |                           |   |                     |   |                          |
| 450 | <p>section_9_action_8_b</p> <p>Show the field ONLY if:<br/>[section_9_action_8_yes_no] = '1'</p>    | <p>B. How acceptable was changing service sites to increase bundle access among ICU team members?</p>                                                                                                                        | <p>radio, Required</p> <table border="1"> <tr><td>1</td><td>1 = Not at all acceptable</td></tr> <tr><td>2</td><td>2 = Somewhat acceptable</td></tr> <tr><td>3</td><td>3 = Moderately acceptable</td></tr> <tr><td>4</td><td>4 = Very acceptable</td></tr> <tr><td>5</td><td>5 = Extremely acceptable</td></tr> </table> | 1 | 1 = Not at all acceptable | 2 | 2 = Somewhat acceptable | 3 | 3 = Moderately acceptable | 4 | 4 = Very acceptable | 5 | 5 = Extremely acceptable |
| 1   | 1 = Not at all acceptable                                                                           |                                                                                                                                                                                                                              |                                                                                                                                                                                                                                                                                                                         |   |                           |   |                         |   |                           |   |                     |   |                          |
| 2   | 2 = Somewhat acceptable                                                                             |                                                                                                                                                                                                                              |                                                                                                                                                                                                                                                                                                                         |   |                           |   |                         |   |                           |   |                     |   |                          |
| 3   | 3 = Moderately acceptable                                                                           |                                                                                                                                                                                                                              |                                                                                                                                                                                                                                                                                                                         |   |                           |   |                         |   |                           |   |                     |   |                          |
| 4   | 4 = Very acceptable                                                                                 |                                                                                                                                                                                                                              |                                                                                                                                                                                                                                                                                                                         |   |                           |   |                         |   |                           |   |                     |   |                          |
| 5   | 5 = Extremely acceptable                                                                            |                                                                                                                                                                                                                              |                                                                                                                                                                                                                                                                                                                         |   |                           |   |                         |   |                           |   |                     |   |                          |

|     |                                                                                         |                                                                                                                                                                                                                                                                                                                                                                                                                                                                                                                                                                                                                                                                                                                                                                                                                                         |                                                                                                                                                                                                                                                                                                                     |   |                           |   |                         |   |                           |   |                     |   |                          |
|-----|-----------------------------------------------------------------------------------------|-----------------------------------------------------------------------------------------------------------------------------------------------------------------------------------------------------------------------------------------------------------------------------------------------------------------------------------------------------------------------------------------------------------------------------------------------------------------------------------------------------------------------------------------------------------------------------------------------------------------------------------------------------------------------------------------------------------------------------------------------------------------------------------------------------------------------------------------|---------------------------------------------------------------------------------------------------------------------------------------------------------------------------------------------------------------------------------------------------------------------------------------------------------------------|---|---------------------------|---|-------------------------|---|---------------------------|---|---------------------|---|--------------------------|
| 451 | section_9_action_8_c<br>Show the field ONLY if:<br>[section_9_action_8_yes_no] = '1'    | C. How feasible was it to change service sites to increase bundle access?                                                                                                                                                                                                                                                                                                                                                                                                                                                                                                                                                                                                                                                                                                                                                               | radio, Required<br><table border="1"> <tr><td>1</td><td>1 = Not at all feasible</td></tr> <tr><td>2</td><td>2 = Somewhat feasible</td></tr> <tr><td>3</td><td>3 = Moderately feasible</td></tr> <tr><td>4</td><td>4 = Very feasible</td></tr> <tr><td>5</td><td>5 = Extremely feasible</td></tr> </table>           | 1 | 1 = Not at all feasible   | 2 | 2 = Somewhat feasible   | 3 | 3 = Moderately feasible   | 4 | 4 = Very feasible   | 5 | 5 = Extremely feasible   |
| 1   | 1 = Not at all feasible                                                                 |                                                                                                                                                                                                                                                                                                                                                                                                                                                                                                                                                                                                                                                                                                                                                                                                                                         |                                                                                                                                                                                                                                                                                                                     |   |                           |   |                         |   |                           |   |                     |   |                          |
| 2   | 2 = Somewhat feasible                                                                   |                                                                                                                                                                                                                                                                                                                                                                                                                                                                                                                                                                                                                                                                                                                                                                                                                                         |                                                                                                                                                                                                                                                                                                                     |   |                           |   |                         |   |                           |   |                     |   |                          |
| 3   | 3 = Moderately feasible                                                                 |                                                                                                                                                                                                                                                                                                                                                                                                                                                                                                                                                                                                                                                                                                                                                                                                                                         |                                                                                                                                                                                                                                                                                                                     |   |                           |   |                         |   |                           |   |                     |   |                          |
| 4   | 4 = Very feasible                                                                       |                                                                                                                                                                                                                                                                                                                                                                                                                                                                                                                                                                                                                                                                                                                                                                                                                                         |                                                                                                                                                                                                                                                                                                                     |   |                           |   |                         |   |                           |   |                     |   |                          |
| 5   | 5 = Extremely feasible                                                                  |                                                                                                                                                                                                                                                                                                                                                                                                                                                                                                                                                                                                                                                                                                                                                                                                                                         |                                                                                                                                                                                                                                                                                                                     |   |                           |   |                         |   |                           |   |                     |   |                          |
| 452 | section_9_action_8_d<br>Show the field ONLY if:<br>[section_9_action_8_yes_no] = '1'    | D. How costly (in terms of staff time, equipment, and other) was changing service sites to increase bundle access?                                                                                                                                                                                                                                                                                                                                                                                                                                                                                                                                                                                                                                                                                                                      | radio, Required<br><table border="1"> <tr><td>1</td><td>1 = Not at all costly</td></tr> <tr><td>2</td><td>2 = Somewhat costly</td></tr> <tr><td>3</td><td>3 = Moderately costly</td></tr> <tr><td>4</td><td>4 = Very costly</td></tr> <tr><td>5</td><td>5 = Extremely costly</td></tr> </table>                     | 1 | 1 = Not at all costly     | 2 | 2 = Somewhat costly     | 3 | 3 = Moderately costly     | 4 | 4 = Very costly     | 5 | 5 = Extremely costly     |
| 1   | 1 = Not at all costly                                                                   |                                                                                                                                                                                                                                                                                                                                                                                                                                                                                                                                                                                                                                                                                                                                                                                                                                         |                                                                                                                                                                                                                                                                                                                     |   |                           |   |                         |   |                           |   |                     |   |                          |
| 2   | 2 = Somewhat costly                                                                     |                                                                                                                                                                                                                                                                                                                                                                                                                                                                                                                                                                                                                                                                                                                                                                                                                                         |                                                                                                                                                                                                                                                                                                                     |   |                           |   |                         |   |                           |   |                     |   |                          |
| 3   | 3 = Moderately costly                                                                   |                                                                                                                                                                                                                                                                                                                                                                                                                                                                                                                                                                                                                                                                                                                                                                                                                                         |                                                                                                                                                                                                                                                                                                                     |   |                           |   |                         |   |                           |   |                     |   |                          |
| 4   | 4 = Very costly                                                                         |                                                                                                                                                                                                                                                                                                                                                                                                                                                                                                                                                                                                                                                                                                                                                                                                                                         |                                                                                                                                                                                                                                                                                                                     |   |                           |   |                         |   |                           |   |                     |   |                          |
| 5   | 5 = Extremely costly                                                                    |                                                                                                                                                                                                                                                                                                                                                                                                                                                                                                                                                                                                                                                                                                                                                                                                                                         |                                                                                                                                                                                                                                                                                                                     |   |                           |   |                         |   |                           |   |                     |   |                          |
| 453 | section_10_text                                                                         | Section Header:<br>SECTION 10: ADDITIONAL ACTIONS<br><br>This section provides you an opportunity to share any additional actions/strategies that your team used to increase adoption of the ABCDEF bundle during the course of the ICU Liberation Collaborative that may not have been provided/described in Sections 1-9.<br><br>We ask that you enter a brief name for the action/strategy taken and provide a short description of what the action/strategy involved in the fields below. Finally, please rank the action/strategy in terms of how helpful, acceptable, feasible, and costly it was. You may enter as many additional actions/strategies as you like.<br><br>This section can be left blank if Sections 1-9 adequately described all of the actions/strategies your team used to facilitate ABCDEF bundle adoption. | descriptive                                                                                                                                                                                                                                                                                                         |   |                           |   |                         |   |                           |   |                     |   |                          |
| 454 | section_10_action_1_name                                                                | Action 1 Name:                                                                                                                                                                                                                                                                                                                                                                                                                                                                                                                                                                                                                                                                                                                                                                                                                          | text                                                                                                                                                                                                                                                                                                                |   |                           |   |                         |   |                           |   |                     |   |                          |
| 455 | section_10_action_1_desc<br>Show the field ONLY if:<br>[section_10_action_1_name] <> "" | Action Brief Description:                                                                                                                                                                                                                                                                                                                                                                                                                                                                                                                                                                                                                                                                                                                                                                                                               | notes, Required                                                                                                                                                                                                                                                                                                     |   |                           |   |                         |   |                           |   |                     |   |                          |
| 456 | section_10_action_1_text<br>Show the field ONLY if:<br>[section_10_action_1_name] <> "" | When reflecting on your ICU's ABCDEF bundle implementation efforts:                                                                                                                                                                                                                                                                                                                                                                                                                                                                                                                                                                                                                                                                                                                                                                     | descriptive                                                                                                                                                                                                                                                                                                         |   |                           |   |                         |   |                           |   |                     |   |                          |
| 457 | section_10_action_1_a<br>Show the field ONLY if:<br>[section_10_action_1_name] <> ""    | A. How helpful was the above action for increasing bundle adoption?                                                                                                                                                                                                                                                                                                                                                                                                                                                                                                                                                                                                                                                                                                                                                                     | radio, Required<br><table border="1"> <tr><td>1</td><td>1 = Not at all helpful</td></tr> <tr><td>2</td><td>2 = Somewhat helpful</td></tr> <tr><td>3</td><td>3 = Moderately helpful</td></tr> <tr><td>4</td><td>4 = Very helpful</td></tr> <tr><td>5</td><td>5 = Extremely helpful</td></tr> </table>                | 1 | 1 = Not at all helpful    | 2 | 2 = Somewhat helpful    | 3 | 3 = Moderately helpful    | 4 | 4 = Very helpful    | 5 | 5 = Extremely helpful    |
| 1   | 1 = Not at all helpful                                                                  |                                                                                                                                                                                                                                                                                                                                                                                                                                                                                                                                                                                                                                                                                                                                                                                                                                         |                                                                                                                                                                                                                                                                                                                     |   |                           |   |                         |   |                           |   |                     |   |                          |
| 2   | 2 = Somewhat helpful                                                                    |                                                                                                                                                                                                                                                                                                                                                                                                                                                                                                                                                                                                                                                                                                                                                                                                                                         |                                                                                                                                                                                                                                                                                                                     |   |                           |   |                         |   |                           |   |                     |   |                          |
| 3   | 3 = Moderately helpful                                                                  |                                                                                                                                                                                                                                                                                                                                                                                                                                                                                                                                                                                                                                                                                                                                                                                                                                         |                                                                                                                                                                                                                                                                                                                     |   |                           |   |                         |   |                           |   |                     |   |                          |
| 4   | 4 = Very helpful                                                                        |                                                                                                                                                                                                                                                                                                                                                                                                                                                                                                                                                                                                                                                                                                                                                                                                                                         |                                                                                                                                                                                                                                                                                                                     |   |                           |   |                         |   |                           |   |                     |   |                          |
| 5   | 5 = Extremely helpful                                                                   |                                                                                                                                                                                                                                                                                                                                                                                                                                                                                                                                                                                                                                                                                                                                                                                                                                         |                                                                                                                                                                                                                                                                                                                     |   |                           |   |                         |   |                           |   |                     |   |                          |
| 458 | section_10_action_1_b<br>Show the field ONLY if:<br>[section_10_action_1_name] <> ""    | B. How acceptable was the above action among ICU team members?                                                                                                                                                                                                                                                                                                                                                                                                                                                                                                                                                                                                                                                                                                                                                                          | radio, Required<br><table border="1"> <tr><td>1</td><td>1 = Not at all acceptable</td></tr> <tr><td>2</td><td>2 = Somewhat acceptable</td></tr> <tr><td>3</td><td>3 = Moderately acceptable</td></tr> <tr><td>4</td><td>4 = Very acceptable</td></tr> <tr><td>5</td><td>5 = Extremely acceptable</td></tr> </table> | 1 | 1 = Not at all acceptable | 2 | 2 = Somewhat acceptable | 3 | 3 = Moderately acceptable | 4 | 4 = Very acceptable | 5 | 5 = Extremely acceptable |
| 1   | 1 = Not at all acceptable                                                               |                                                                                                                                                                                                                                                                                                                                                                                                                                                                                                                                                                                                                                                                                                                                                                                                                                         |                                                                                                                                                                                                                                                                                                                     |   |                           |   |                         |   |                           |   |                     |   |                          |
| 2   | 2 = Somewhat acceptable                                                                 |                                                                                                                                                                                                                                                                                                                                                                                                                                                                                                                                                                                                                                                                                                                                                                                                                                         |                                                                                                                                                                                                                                                                                                                     |   |                           |   |                         |   |                           |   |                     |   |                          |
| 3   | 3 = Moderately acceptable                                                               |                                                                                                                                                                                                                                                                                                                                                                                                                                                                                                                                                                                                                                                                                                                                                                                                                                         |                                                                                                                                                                                                                                                                                                                     |   |                           |   |                         |   |                           |   |                     |   |                          |
| 4   | 4 = Very acceptable                                                                     |                                                                                                                                                                                                                                                                                                                                                                                                                                                                                                                                                                                                                                                                                                                                                                                                                                         |                                                                                                                                                                                                                                                                                                                     |   |                           |   |                         |   |                           |   |                     |   |                          |
| 5   | 5 = Extremely acceptable                                                                |                                                                                                                                                                                                                                                                                                                                                                                                                                                                                                                                                                                                                                                                                                                                                                                                                                         |                                                                                                                                                                                                                                                                                                                     |   |                           |   |                         |   |                           |   |                     |   |                          |
| 459 | section_10_action_1_c<br>Show the field ONLY if:<br>[section_10_action_1_name] <> ""    | C. How feasible was the above action?                                                                                                                                                                                                                                                                                                                                                                                                                                                                                                                                                                                                                                                                                                                                                                                                   | radio, Required<br><table border="1"> <tr><td>1</td><td>1 = Not at all feasible</td></tr> <tr><td>2</td><td>2 = Somewhat feasible</td></tr> <tr><td>3</td><td>3 = Moderately feasible</td></tr> <tr><td>4</td><td>4 = Very feasible</td></tr> <tr><td>5</td><td>5 = Extremely feasible</td></tr> </table>           | 1 | 1 = Not at all feasible   | 2 | 2 = Somewhat feasible   | 3 | 3 = Moderately feasible   | 4 | 4 = Very feasible   | 5 | 5 = Extremely feasible   |
| 1   | 1 = Not at all feasible                                                                 |                                                                                                                                                                                                                                                                                                                                                                                                                                                                                                                                                                                                                                                                                                                                                                                                                                         |                                                                                                                                                                                                                                                                                                                     |   |                           |   |                         |   |                           |   |                     |   |                          |
| 2   | 2 = Somewhat feasible                                                                   |                                                                                                                                                                                                                                                                                                                                                                                                                                                                                                                                                                                                                                                                                                                                                                                                                                         |                                                                                                                                                                                                                                                                                                                     |   |                           |   |                         |   |                           |   |                     |   |                          |
| 3   | 3 = Moderately feasible                                                                 |                                                                                                                                                                                                                                                                                                                                                                                                                                                                                                                                                                                                                                                                                                                                                                                                                                         |                                                                                                                                                                                                                                                                                                                     |   |                           |   |                         |   |                           |   |                     |   |                          |
| 4   | 4 = Very feasible                                                                       |                                                                                                                                                                                                                                                                                                                                                                                                                                                                                                                                                                                                                                                                                                                                                                                                                                         |                                                                                                                                                                                                                                                                                                                     |   |                           |   |                         |   |                           |   |                     |   |                          |
| 5   | 5 = Extremely feasible                                                                  |                                                                                                                                                                                                                                                                                                                                                                                                                                                                                                                                                                                                                                                                                                                                                                                                                                         |                                                                                                                                                                                                                                                                                                                     |   |                           |   |                         |   |                           |   |                     |   |                          |

|     |                                                                                                              |                                                                                    |                                                                                                                                                                                                                                                                                                                         |   |                           |   |                         |   |                           |   |                     |   |                          |
|-----|--------------------------------------------------------------------------------------------------------------|------------------------------------------------------------------------------------|-------------------------------------------------------------------------------------------------------------------------------------------------------------------------------------------------------------------------------------------------------------------------------------------------------------------------|---|---------------------------|---|-------------------------|---|---------------------------|---|---------------------|---|--------------------------|
| 460 | <p>section_10_action_1_d</p> <p>Show the field ONLY if:<br/>[section_10_action_1_name] &lt;&gt;<br/>"</p>    | D. How costly (in terms of staff time, equipment, and other) was the above action? | <p>radio, Required</p> <table border="1"> <tr><td>1</td><td>1 = Not at all costly</td></tr> <tr><td>2</td><td>2 = Somewhat costly</td></tr> <tr><td>3</td><td>3 = Moderately costly</td></tr> <tr><td>4</td><td>4 = Very costly</td></tr> <tr><td>5</td><td>5 = Extremely costly</td></tr> </table>                     | 1 | 1 = Not at all costly     | 2 | 2 = Somewhat costly     | 3 | 3 = Moderately costly     | 4 | 4 = Very costly     | 5 | 5 = Extremely costly     |
| 1   | 1 = Not at all costly                                                                                        |                                                                                    |                                                                                                                                                                                                                                                                                                                         |   |                           |   |                         |   |                           |   |                     |   |                          |
| 2   | 2 = Somewhat costly                                                                                          |                                                                                    |                                                                                                                                                                                                                                                                                                                         |   |                           |   |                         |   |                           |   |                     |   |                          |
| 3   | 3 = Moderately costly                                                                                        |                                                                                    |                                                                                                                                                                                                                                                                                                                         |   |                           |   |                         |   |                           |   |                     |   |                          |
| 4   | 4 = Very costly                                                                                              |                                                                                    |                                                                                                                                                                                                                                                                                                                         |   |                           |   |                         |   |                           |   |                     |   |                          |
| 5   | 5 = Extremely costly                                                                                         |                                                                                    |                                                                                                                                                                                                                                                                                                                         |   |                           |   |                         |   |                           |   |                     |   |                          |
| 461 | <p>section_10_action_2_name</p>                                                                              | Action 2 Name:                                                                     | text                                                                                                                                                                                                                                                                                                                    |   |                           |   |                         |   |                           |   |                     |   |                          |
| 462 | <p>section_10_action_2_desc</p> <p>Show the field ONLY if:<br/>[section_10_action_2_name] &lt;&gt;<br/>"</p> | Action Brief Description:                                                          | notes, Required                                                                                                                                                                                                                                                                                                         |   |                           |   |                         |   |                           |   |                     |   |                          |
| 463 | <p>section_10_action_2_text</p> <p>Show the field ONLY if:<br/>[section_10_action_2_name] &lt;&gt;<br/>"</p> | When reflecting on your ICU's ABCDEF bundle implementation efforts:                | descriptive                                                                                                                                                                                                                                                                                                             |   |                           |   |                         |   |                           |   |                     |   |                          |
| 464 | <p>section_10_action_2_a</p> <p>Show the field ONLY if:<br/>[section_10_action_2_name] &lt;&gt;<br/>"</p>    | A. How helpful was the above action for increasing bundle adoption?                | <p>radio, Required</p> <table border="1"> <tr><td>1</td><td>1 = Not at all helpful</td></tr> <tr><td>2</td><td>2 = Somewhat helpful</td></tr> <tr><td>3</td><td>3 = Moderately helpful</td></tr> <tr><td>4</td><td>4 = Very helpful</td></tr> <tr><td>5</td><td>5 = Extremely helpful</td></tr> </table>                | 1 | 1 = Not at all helpful    | 2 | 2 = Somewhat helpful    | 3 | 3 = Moderately helpful    | 4 | 4 = Very helpful    | 5 | 5 = Extremely helpful    |
| 1   | 1 = Not at all helpful                                                                                       |                                                                                    |                                                                                                                                                                                                                                                                                                                         |   |                           |   |                         |   |                           |   |                     |   |                          |
| 2   | 2 = Somewhat helpful                                                                                         |                                                                                    |                                                                                                                                                                                                                                                                                                                         |   |                           |   |                         |   |                           |   |                     |   |                          |
| 3   | 3 = Moderately helpful                                                                                       |                                                                                    |                                                                                                                                                                                                                                                                                                                         |   |                           |   |                         |   |                           |   |                     |   |                          |
| 4   | 4 = Very helpful                                                                                             |                                                                                    |                                                                                                                                                                                                                                                                                                                         |   |                           |   |                         |   |                           |   |                     |   |                          |
| 5   | 5 = Extremely helpful                                                                                        |                                                                                    |                                                                                                                                                                                                                                                                                                                         |   |                           |   |                         |   |                           |   |                     |   |                          |
| 465 | <p>section_10_action_2_b</p> <p>Show the field ONLY if:<br/>[section_10_action_2_name] &lt;&gt;<br/>"</p>    | B. How acceptable was the above action among ICU team members?                     | <p>radio, Required</p> <table border="1"> <tr><td>1</td><td>1 = Not at all acceptable</td></tr> <tr><td>2</td><td>2 = Somewhat acceptable</td></tr> <tr><td>3</td><td>3 = Moderately acceptable</td></tr> <tr><td>4</td><td>4 = Very acceptable</td></tr> <tr><td>5</td><td>5 = Extremely acceptable</td></tr> </table> | 1 | 1 = Not at all acceptable | 2 | 2 = Somewhat acceptable | 3 | 3 = Moderately acceptable | 4 | 4 = Very acceptable | 5 | 5 = Extremely acceptable |
| 1   | 1 = Not at all acceptable                                                                                    |                                                                                    |                                                                                                                                                                                                                                                                                                                         |   |                           |   |                         |   |                           |   |                     |   |                          |
| 2   | 2 = Somewhat acceptable                                                                                      |                                                                                    |                                                                                                                                                                                                                                                                                                                         |   |                           |   |                         |   |                           |   |                     |   |                          |
| 3   | 3 = Moderately acceptable                                                                                    |                                                                                    |                                                                                                                                                                                                                                                                                                                         |   |                           |   |                         |   |                           |   |                     |   |                          |
| 4   | 4 = Very acceptable                                                                                          |                                                                                    |                                                                                                                                                                                                                                                                                                                         |   |                           |   |                         |   |                           |   |                     |   |                          |
| 5   | 5 = Extremely acceptable                                                                                     |                                                                                    |                                                                                                                                                                                                                                                                                                                         |   |                           |   |                         |   |                           |   |                     |   |                          |
| 466 | <p>section_10_action_2_c</p> <p>Show the field ONLY if:<br/>[section_10_action_2_name] &lt;&gt;<br/>"</p>    | C. How feasible was the above action?                                              | <p>radio, Required</p> <table border="1"> <tr><td>1</td><td>1 = Not at all feasible</td></tr> <tr><td>2</td><td>2 = Somewhat feasible</td></tr> <tr><td>3</td><td>3 = Moderately feasible</td></tr> <tr><td>4</td><td>4 = Very feasible</td></tr> <tr><td>5</td><td>5 = Extremely feasible</td></tr> </table>           | 1 | 1 = Not at all feasible   | 2 | 2 = Somewhat feasible   | 3 | 3 = Moderately feasible   | 4 | 4 = Very feasible   | 5 | 5 = Extremely feasible   |
| 1   | 1 = Not at all feasible                                                                                      |                                                                                    |                                                                                                                                                                                                                                                                                                                         |   |                           |   |                         |   |                           |   |                     |   |                          |
| 2   | 2 = Somewhat feasible                                                                                        |                                                                                    |                                                                                                                                                                                                                                                                                                                         |   |                           |   |                         |   |                           |   |                     |   |                          |
| 3   | 3 = Moderately feasible                                                                                      |                                                                                    |                                                                                                                                                                                                                                                                                                                         |   |                           |   |                         |   |                           |   |                     |   |                          |
| 4   | 4 = Very feasible                                                                                            |                                                                                    |                                                                                                                                                                                                                                                                                                                         |   |                           |   |                         |   |                           |   |                     |   |                          |
| 5   | 5 = Extremely feasible                                                                                       |                                                                                    |                                                                                                                                                                                                                                                                                                                         |   |                           |   |                         |   |                           |   |                     |   |                          |
| 467 | <p>section_10_action_2_d</p> <p>Show the field ONLY if:<br/>[section_10_action_2_name] &lt;&gt;<br/>"</p>    | D. How costly (in terms of staff time, equipment, and other) was the above action? | <p>radio, Required</p> <table border="1"> <tr><td>1</td><td>1 =Not at all costly</td></tr> <tr><td>2</td><td>2 = Somewhat costly</td></tr> <tr><td>3</td><td>3 = Moderately costly</td></tr> <tr><td>4</td><td>4 = Very costly</td></tr> <tr><td>5</td><td>5 = Extremely costly</td></tr> </table>                      | 1 | 1 =Not at all costly      | 2 | 2 = Somewhat costly     | 3 | 3 = Moderately costly     | 4 | 4 = Very costly     | 5 | 5 = Extremely costly     |
| 1   | 1 =Not at all costly                                                                                         |                                                                                    |                                                                                                                                                                                                                                                                                                                         |   |                           |   |                         |   |                           |   |                     |   |                          |
| 2   | 2 = Somewhat costly                                                                                          |                                                                                    |                                                                                                                                                                                                                                                                                                                         |   |                           |   |                         |   |                           |   |                     |   |                          |
| 3   | 3 = Moderately costly                                                                                        |                                                                                    |                                                                                                                                                                                                                                                                                                                         |   |                           |   |                         |   |                           |   |                     |   |                          |
| 4   | 4 = Very costly                                                                                              |                                                                                    |                                                                                                                                                                                                                                                                                                                         |   |                           |   |                         |   |                           |   |                     |   |                          |
| 5   | 5 = Extremely costly                                                                                         |                                                                                    |                                                                                                                                                                                                                                                                                                                         |   |                           |   |                         |   |                           |   |                     |   |                          |
| 468 | <p>section_10_action_3_name</p>                                                                              | Action 3 Name:                                                                     | text                                                                                                                                                                                                                                                                                                                    |   |                           |   |                         |   |                           |   |                     |   |                          |
| 469 | <p>section_10_action_3_desc</p> <p>Show the field ONLY if:<br/>[section_10_action_3_name] &lt;&gt;<br/>"</p> | Action Brief Description:                                                          | notes, Required                                                                                                                                                                                                                                                                                                         |   |                           |   |                         |   |                           |   |                     |   |                          |
| 470 | <p>section_10_action_3_text</p> <p>Show the field ONLY if:<br/>[section_10_action_3_name] &lt;&gt;<br/>"</p> | When reflecting on your ICU's ABCDEF bundle implementation efforts:                | descriptive                                                                                                                                                                                                                                                                                                             |   |                           |   |                         |   |                           |   |                     |   |                          |
| 471 | <p>section_10_action_3_a</p> <p>Show the field ONLY if:<br/>[section_10_action_3_name] &lt;&gt;<br/>"</p>    | A. How helpful was the above action for increasing bundle adoption?                | <p>radio, Required</p> <table border="1"> <tr><td>1</td><td>1 = Not at all helpful</td></tr> <tr><td>2</td><td>2 = Somewhat helpful</td></tr> <tr><td>3</td><td>3 = Moderately helpful</td></tr> <tr><td>4</td><td>4 = Very helpful</td></tr> <tr><td>5</td><td>5 = Extremely helpful</td></tr> </table>                | 1 | 1 = Not at all helpful    | 2 | 2 = Somewhat helpful    | 3 | 3 = Moderately helpful    | 4 | 4 = Very helpful    | 5 | 5 = Extremely helpful    |
| 1   | 1 = Not at all helpful                                                                                       |                                                                                    |                                                                                                                                                                                                                                                                                                                         |   |                           |   |                         |   |                           |   |                     |   |                          |
| 2   | 2 = Somewhat helpful                                                                                         |                                                                                    |                                                                                                                                                                                                                                                                                                                         |   |                           |   |                         |   |                           |   |                     |   |                          |
| 3   | 3 = Moderately helpful                                                                                       |                                                                                    |                                                                                                                                                                                                                                                                                                                         |   |                           |   |                         |   |                           |   |                     |   |                          |
| 4   | 4 = Very helpful                                                                                             |                                                                                    |                                                                                                                                                                                                                                                                                                                         |   |                           |   |                         |   |                           |   |                     |   |                          |
| 5   | 5 = Extremely helpful                                                                                        |                                                                                    |                                                                                                                                                                                                                                                                                                                         |   |                           |   |                         |   |                           |   |                     |   |                          |

|     |                                                                                        |                                                                                    |                                                                                                                                                                                                                                                                                                                                                                                                                                                                                                                                                                                                                                                                                                                                                                                                                                                                                                                                                                                                                                                                                                                                                                                                                                                                                                                                                                                                                                                                                                                                                          |     |                           |     |                         |     |                           |     |                     |     |                          |     |                     |     |                         |     |               |     |                 |     |              |     |                  |     |                   |     |                      |     |                      |     |                        |     |            |     |                      |     |                 |     |            |     |                 |     |              |     |              |     |                       |     |              |     |                   |     |           |     |                 |     |             |     |                    |     |                |     |                         |
|-----|----------------------------------------------------------------------------------------|------------------------------------------------------------------------------------|----------------------------------------------------------------------------------------------------------------------------------------------------------------------------------------------------------------------------------------------------------------------------------------------------------------------------------------------------------------------------------------------------------------------------------------------------------------------------------------------------------------------------------------------------------------------------------------------------------------------------------------------------------------------------------------------------------------------------------------------------------------------------------------------------------------------------------------------------------------------------------------------------------------------------------------------------------------------------------------------------------------------------------------------------------------------------------------------------------------------------------------------------------------------------------------------------------------------------------------------------------------------------------------------------------------------------------------------------------------------------------------------------------------------------------------------------------------------------------------------------------------------------------------------------------|-----|---------------------------|-----|-------------------------|-----|---------------------------|-----|---------------------|-----|--------------------------|-----|---------------------|-----|-------------------------|-----|---------------|-----|-----------------|-----|--------------|-----|------------------|-----|-------------------|-----|----------------------|-----|----------------------|-----|------------------------|-----|------------|-----|----------------------|-----|-----------------|-----|------------|-----|-----------------|-----|--------------|-----|--------------|-----|-----------------------|-----|--------------|-----|-------------------|-----|-----------|-----|-----------------|-----|-------------|-----|--------------------|-----|----------------|-----|-------------------------|
| 472 | section_10_action_3_b<br>Show the field ONLY if:<br>[section_10_action_3_name] <><br>" | B. How acceptable was the above action among ICU team members?                     | radio, Required<br><table border="1"> <tr><td>1</td><td>1 = Not at all acceptable</td></tr> <tr><td>2</td><td>2 = Somewhat acceptable</td></tr> <tr><td>3</td><td>3 = Moderately acceptable</td></tr> <tr><td>4</td><td>4 = Very acceptable</td></tr> <tr><td>5</td><td>5 = Extremely acceptable</td></tr> </table>                                                                                                                                                                                                                                                                                                                                                                                                                                                                                                                                                                                                                                                                                                                                                                                                                                                                                                                                                                                                                                                                                                                                                                                                                                      | 1   | 1 = Not at all acceptable | 2   | 2 = Somewhat acceptable | 3   | 3 = Moderately acceptable | 4   | 4 = Very acceptable | 5   | 5 = Extremely acceptable |     |                     |     |                         |     |               |     |                 |     |              |     |                  |     |                   |     |                      |     |                      |     |                        |     |            |     |                      |     |                 |     |            |     |                 |     |              |     |              |     |                       |     |              |     |                   |     |           |     |                 |     |             |     |                    |     |                |     |                         |
| 1   | 1 = Not at all acceptable                                                              |                                                                                    |                                                                                                                                                                                                                                                                                                                                                                                                                                                                                                                                                                                                                                                                                                                                                                                                                                                                                                                                                                                                                                                                                                                                                                                                                                                                                                                                                                                                                                                                                                                                                          |     |                           |     |                         |     |                           |     |                     |     |                          |     |                     |     |                         |     |               |     |                 |     |              |     |                  |     |                   |     |                      |     |                      |     |                        |     |            |     |                      |     |                 |     |            |     |                 |     |              |     |              |     |                       |     |              |     |                   |     |           |     |                 |     |             |     |                    |     |                |     |                         |
| 2   | 2 = Somewhat acceptable                                                                |                                                                                    |                                                                                                                                                                                                                                                                                                                                                                                                                                                                                                                                                                                                                                                                                                                                                                                                                                                                                                                                                                                                                                                                                                                                                                                                                                                                                                                                                                                                                                                                                                                                                          |     |                           |     |                         |     |                           |     |                     |     |                          |     |                     |     |                         |     |               |     |                 |     |              |     |                  |     |                   |     |                      |     |                      |     |                        |     |            |     |                      |     |                 |     |            |     |                 |     |              |     |              |     |                       |     |              |     |                   |     |           |     |                 |     |             |     |                    |     |                |     |                         |
| 3   | 3 = Moderately acceptable                                                              |                                                                                    |                                                                                                                                                                                                                                                                                                                                                                                                                                                                                                                                                                                                                                                                                                                                                                                                                                                                                                                                                                                                                                                                                                                                                                                                                                                                                                                                                                                                                                                                                                                                                          |     |                           |     |                         |     |                           |     |                     |     |                          |     |                     |     |                         |     |               |     |                 |     |              |     |                  |     |                   |     |                      |     |                      |     |                        |     |            |     |                      |     |                 |     |            |     |                 |     |              |     |              |     |                       |     |              |     |                   |     |           |     |                 |     |             |     |                    |     |                |     |                         |
| 4   | 4 = Very acceptable                                                                    |                                                                                    |                                                                                                                                                                                                                                                                                                                                                                                                                                                                                                                                                                                                                                                                                                                                                                                                                                                                                                                                                                                                                                                                                                                                                                                                                                                                                                                                                                                                                                                                                                                                                          |     |                           |     |                         |     |                           |     |                     |     |                          |     |                     |     |                         |     |               |     |                 |     |              |     |                  |     |                   |     |                      |     |                      |     |                        |     |            |     |                      |     |                 |     |            |     |                 |     |              |     |              |     |                       |     |              |     |                   |     |           |     |                 |     |             |     |                    |     |                |     |                         |
| 5   | 5 = Extremely acceptable                                                               |                                                                                    |                                                                                                                                                                                                                                                                                                                                                                                                                                                                                                                                                                                                                                                                                                                                                                                                                                                                                                                                                                                                                                                                                                                                                                                                                                                                                                                                                                                                                                                                                                                                                          |     |                           |     |                         |     |                           |     |                     |     |                          |     |                     |     |                         |     |               |     |                 |     |              |     |                  |     |                   |     |                      |     |                      |     |                        |     |            |     |                      |     |                 |     |            |     |                 |     |              |     |              |     |                       |     |              |     |                   |     |           |     |                 |     |             |     |                    |     |                |     |                         |
| 473 | section_10_action_3_c<br>Show the field ONLY if:<br>[section_10_action_3_name] <><br>" | C. How feasible was the above action?                                              | radio, Required<br><table border="1"> <tr><td>1</td><td>1 = Not at all feasible</td></tr> <tr><td>2</td><td>2 = Somewhat feasible</td></tr> <tr><td>3</td><td>3 = Moderately feasible</td></tr> <tr><td>4</td><td>4 = Very feasible</td></tr> <tr><td>5</td><td>5 = Extremely feasible</td></tr> </table>                                                                                                                                                                                                                                                                                                                                                                                                                                                                                                                                                                                                                                                                                                                                                                                                                                                                                                                                                                                                                                                                                                                                                                                                                                                | 1   | 1 = Not at all feasible   | 2   | 2 = Somewhat feasible   | 3   | 3 = Moderately feasible   | 4   | 4 = Very feasible   | 5   | 5 = Extremely feasible   |     |                     |     |                         |     |               |     |                 |     |              |     |                  |     |                   |     |                      |     |                      |     |                        |     |            |     |                      |     |                 |     |            |     |                 |     |              |     |              |     |                       |     |              |     |                   |     |           |     |                 |     |             |     |                    |     |                |     |                         |
| 1   | 1 = Not at all feasible                                                                |                                                                                    |                                                                                                                                                                                                                                                                                                                                                                                                                                                                                                                                                                                                                                                                                                                                                                                                                                                                                                                                                                                                                                                                                                                                                                                                                                                                                                                                                                                                                                                                                                                                                          |     |                           |     |                         |     |                           |     |                     |     |                          |     |                     |     |                         |     |               |     |                 |     |              |     |                  |     |                   |     |                      |     |                      |     |                        |     |            |     |                      |     |                 |     |            |     |                 |     |              |     |              |     |                       |     |              |     |                   |     |           |     |                 |     |             |     |                    |     |                |     |                         |
| 2   | 2 = Somewhat feasible                                                                  |                                                                                    |                                                                                                                                                                                                                                                                                                                                                                                                                                                                                                                                                                                                                                                                                                                                                                                                                                                                                                                                                                                                                                                                                                                                                                                                                                                                                                                                                                                                                                                                                                                                                          |     |                           |     |                         |     |                           |     |                     |     |                          |     |                     |     |                         |     |               |     |                 |     |              |     |                  |     |                   |     |                      |     |                      |     |                        |     |            |     |                      |     |                 |     |            |     |                 |     |              |     |              |     |                       |     |              |     |                   |     |           |     |                 |     |             |     |                    |     |                |     |                         |
| 3   | 3 = Moderately feasible                                                                |                                                                                    |                                                                                                                                                                                                                                                                                                                                                                                                                                                                                                                                                                                                                                                                                                                                                                                                                                                                                                                                                                                                                                                                                                                                                                                                                                                                                                                                                                                                                                                                                                                                                          |     |                           |     |                         |     |                           |     |                     |     |                          |     |                     |     |                         |     |               |     |                 |     |              |     |                  |     |                   |     |                      |     |                      |     |                        |     |            |     |                      |     |                 |     |            |     |                 |     |              |     |              |     |                       |     |              |     |                   |     |           |     |                 |     |             |     |                    |     |                |     |                         |
| 4   | 4 = Very feasible                                                                      |                                                                                    |                                                                                                                                                                                                                                                                                                                                                                                                                                                                                                                                                                                                                                                                                                                                                                                                                                                                                                                                                                                                                                                                                                                                                                                                                                                                                                                                                                                                                                                                                                                                                          |     |                           |     |                         |     |                           |     |                     |     |                          |     |                     |     |                         |     |               |     |                 |     |              |     |                  |     |                   |     |                      |     |                      |     |                        |     |            |     |                      |     |                 |     |            |     |                 |     |              |     |              |     |                       |     |              |     |                   |     |           |     |                 |     |             |     |                    |     |                |     |                         |
| 5   | 5 = Extremely feasible                                                                 |                                                                                    |                                                                                                                                                                                                                                                                                                                                                                                                                                                                                                                                                                                                                                                                                                                                                                                                                                                                                                                                                                                                                                                                                                                                                                                                                                                                                                                                                                                                                                                                                                                                                          |     |                           |     |                         |     |                           |     |                     |     |                          |     |                     |     |                         |     |               |     |                 |     |              |     |                  |     |                   |     |                      |     |                      |     |                        |     |            |     |                      |     |                 |     |            |     |                 |     |              |     |              |     |                       |     |              |     |                   |     |           |     |                 |     |             |     |                    |     |                |     |                         |
| 474 | section_10_action_3_d<br>Show the field ONLY if:<br>[section_10_action_3_name] <><br>" | D. How costly (in terms of staff time, equipment, and other) was the above action? | radio, Required<br><table border="1"> <tr><td>1</td><td>1 =Not at all costly</td></tr> <tr><td>2</td><td>2 = Somewhat costly</td></tr> <tr><td>3</td><td>3 = Moderately costly</td></tr> <tr><td>4</td><td>4 = Very costly</td></tr> <tr><td>5</td><td>5 = Extremely costly</td></tr> </table>                                                                                                                                                                                                                                                                                                                                                                                                                                                                                                                                                                                                                                                                                                                                                                                                                                                                                                                                                                                                                                                                                                                                                                                                                                                           | 1   | 1 =Not at all costly      | 2   | 2 = Somewhat costly     | 3   | 3 = Moderately costly     | 4   | 4 = Very costly     | 5   | 5 = Extremely costly     |     |                     |     |                         |     |               |     |                 |     |              |     |                  |     |                   |     |                      |     |                      |     |                        |     |            |     |                      |     |                 |     |            |     |                 |     |              |     |              |     |                       |     |              |     |                   |     |           |     |                 |     |             |     |                    |     |                |     |                         |
| 1   | 1 =Not at all costly                                                                   |                                                                                    |                                                                                                                                                                                                                                                                                                                                                                                                                                                                                                                                                                                                                                                                                                                                                                                                                                                                                                                                                                                                                                                                                                                                                                                                                                                                                                                                                                                                                                                                                                                                                          |     |                           |     |                         |     |                           |     |                     |     |                          |     |                     |     |                         |     |               |     |                 |     |              |     |                  |     |                   |     |                      |     |                      |     |                        |     |            |     |                      |     |                 |     |            |     |                 |     |              |     |              |     |                       |     |              |     |                   |     |           |     |                 |     |             |     |                    |     |                |     |                         |
| 2   | 2 = Somewhat costly                                                                    |                                                                                    |                                                                                                                                                                                                                                                                                                                                                                                                                                                                                                                                                                                                                                                                                                                                                                                                                                                                                                                                                                                                                                                                                                                                                                                                                                                                                                                                                                                                                                                                                                                                                          |     |                           |     |                         |     |                           |     |                     |     |                          |     |                     |     |                         |     |               |     |                 |     |              |     |                  |     |                   |     |                      |     |                      |     |                        |     |            |     |                      |     |                 |     |            |     |                 |     |              |     |              |     |                       |     |              |     |                   |     |           |     |                 |     |             |     |                    |     |                |     |                         |
| 3   | 3 = Moderately costly                                                                  |                                                                                    |                                                                                                                                                                                                                                                                                                                                                                                                                                                                                                                                                                                                                                                                                                                                                                                                                                                                                                                                                                                                                                                                                                                                                                                                                                                                                                                                                                                                                                                                                                                                                          |     |                           |     |                         |     |                           |     |                     |     |                          |     |                     |     |                         |     |               |     |                 |     |              |     |                  |     |                   |     |                      |     |                      |     |                        |     |            |     |                      |     |                 |     |            |     |                 |     |              |     |              |     |                       |     |              |     |                   |     |           |     |                 |     |             |     |                    |     |                |     |                         |
| 4   | 4 = Very costly                                                                        |                                                                                    |                                                                                                                                                                                                                                                                                                                                                                                                                                                                                                                                                                                                                                                                                                                                                                                                                                                                                                                                                                                                                                                                                                                                                                                                                                                                                                                                                                                                                                                                                                                                                          |     |                           |     |                         |     |                           |     |                     |     |                          |     |                     |     |                         |     |               |     |                 |     |              |     |                  |     |                   |     |                      |     |                      |     |                        |     |            |     |                      |     |                 |     |            |     |                 |     |              |     |              |     |                       |     |              |     |                   |     |           |     |                 |     |             |     |                    |     |                |     |                         |
| 5   | 5 = Extremely costly                                                                   |                                                                                    |                                                                                                                                                                                                                                                                                                                                                                                                                                                                                                                                                                                                                                                                                                                                                                                                                                                                                                                                                                                                                                                                                                                                                                                                                                                                                                                                                                                                                                                                                                                                                          |     |                           |     |                         |     |                           |     |                     |     |                          |     |                     |     |                         |     |               |     |                 |     |              |     |                  |     |                   |     |                      |     |                      |     |                        |     |            |     |                      |     |                 |     |            |     |                 |     |              |     |              |     |                       |     |              |     |                   |     |           |     |                 |     |             |     |                    |     |                |     |                         |
| 475 | section_11_text                                                                        | Section Header:<br>SECTION 11: SITE CHARACTERISTICS                                | descriptive                                                                                                                                                                                                                                                                                                                                                                                                                                                                                                                                                                                                                                                                                                                                                                                                                                                                                                                                                                                                                                                                                                                                                                                                                                                                                                                                                                                                                                                                                                                                              |     |                           |     |                         |     |                           |     |                     |     |                          |     |                     |     |                         |     |               |     |                 |     |              |     |                  |     |                   |     |                      |     |                      |     |                        |     |            |     |                      |     |                 |     |            |     |                 |     |              |     |              |     |                       |     |              |     |                   |     |           |     |                 |     |             |     |                    |     |                |     |                         |
| 476 | section_11_site_name                                                                   | What hospital/unit are you associated with?                                        | dropdown, Required<br><table border="1"> <tr><td>ACM</td><td>AdvocateChrist-ASHU</td></tr> <tr><td>AGH</td><td>Allegiance-SICU</td></tr> <tr><td>ALT</td><td>Aultman-MICU</td></tr> <tr><td>AMH</td><td>AveraMcKennan-ICU</td></tr> <tr><td>BUT</td><td>Banner-CVICU</td></tr> <tr><td>BMM</td><td>BaptistMemorial-ICU</td></tr> <tr><td>BFP</td><td>BayfrontPetersburg-TICU</td></tr> <tr><td>BMC</td><td>BerkleyMC-ICU</td></tr> <tr><td>BWH</td><td>Butterworth-MCC</td></tr> <tr><td>CFV</td><td>CapeFear-ICU</td></tr> <tr><td>CMC</td><td>CarolinasMC-NICU</td></tr> <tr><td>CDS</td><td>CedarsSinai-CSICU</td></tr> <tr><td>CLC</td><td>ClevelandClinic-SICU</td></tr> <tr><td>CSM</td><td>ColumbiaStMarys-ICU4</td></tr> <tr><td>COR</td><td>CommunityRegional-ICU5</td></tr> <tr><td>CRM</td><td>Corona-ICU</td></tr> <tr><td>DMH</td><td>Dartmouth-ICU 3NORTH</td></tr> <tr><td>EWB</td><td>Edward-NEURO CV</td></tr> <tr><td>EUH</td><td>Emory-MICU</td></tr> <tr><td>FSF</td><td>Francisian-AICU</td></tr> <tr><td>HRH</td><td>Hannibal-ICU</td></tr> <tr><td>HMC</td><td>Harrison-ICU</td></tr> <tr><td>HMH</td><td>HoustonMethodist-MICU</td></tr> <tr><td>IUA</td><td>IndianaU-ICU</td></tr> <tr><td>IMH</td><td>IowaMethodist-CCU</td></tr> <tr><td>KEC</td><td>Keck-SICU</td></tr> <tr><td>KMC</td><td>Kettering-MSICU</td></tr> <tr><td>LAC</td><td>LACUSC-MICU</td></tr> <tr><td>LCH</td><td>LakeCumberland-ICU</td></tr> <tr><td>LRG</td><td>LakeRegion-ICU</td></tr> <tr><td>MPH</td><td>MercyPhiladelphia-MSICU</td></tr> </table> | ACM | AdvocateChrist-ASHU       | AGH | Allegiance-SICU         | ALT | Aultman-MICU              | AMH | AveraMcKennan-ICU   | BUT | Banner-CVICU             | BMM | BaptistMemorial-ICU | BFP | BayfrontPetersburg-TICU | BMC | BerkleyMC-ICU | BWH | Butterworth-MCC | CFV | CapeFear-ICU | CMC | CarolinasMC-NICU | CDS | CedarsSinai-CSICU | CLC | ClevelandClinic-SICU | CSM | ColumbiaStMarys-ICU4 | COR | CommunityRegional-ICU5 | CRM | Corona-ICU | DMH | Dartmouth-ICU 3NORTH | EWB | Edward-NEURO CV | EUH | Emory-MICU | FSF | Francisian-AICU | HRH | Hannibal-ICU | HMC | Harrison-ICU | HMH | HoustonMethodist-MICU | IUA | IndianaU-ICU | IMH | IowaMethodist-CCU | KEC | Keck-SICU | KMC | Kettering-MSICU | LAC | LACUSC-MICU | LCH | LakeCumberland-ICU | LRG | LakeRegion-ICU | MPH | MercyPhiladelphia-MSICU |
| ACM | AdvocateChrist-ASHU                                                                    |                                                                                    |                                                                                                                                                                                                                                                                                                                                                                                                                                                                                                                                                                                                                                                                                                                                                                                                                                                                                                                                                                                                                                                                                                                                                                                                                                                                                                                                                                                                                                                                                                                                                          |     |                           |     |                         |     |                           |     |                     |     |                          |     |                     |     |                         |     |               |     |                 |     |              |     |                  |     |                   |     |                      |     |                      |     |                        |     |            |     |                      |     |                 |     |            |     |                 |     |              |     |              |     |                       |     |              |     |                   |     |           |     |                 |     |             |     |                    |     |                |     |                         |
| AGH | Allegiance-SICU                                                                        |                                                                                    |                                                                                                                                                                                                                                                                                                                                                                                                                                                                                                                                                                                                                                                                                                                                                                                                                                                                                                                                                                                                                                                                                                                                                                                                                                                                                                                                                                                                                                                                                                                                                          |     |                           |     |                         |     |                           |     |                     |     |                          |     |                     |     |                         |     |               |     |                 |     |              |     |                  |     |                   |     |                      |     |                      |     |                        |     |            |     |                      |     |                 |     |            |     |                 |     |              |     |              |     |                       |     |              |     |                   |     |           |     |                 |     |             |     |                    |     |                |     |                         |
| ALT | Aultman-MICU                                                                           |                                                                                    |                                                                                                                                                                                                                                                                                                                                                                                                                                                                                                                                                                                                                                                                                                                                                                                                                                                                                                                                                                                                                                                                                                                                                                                                                                                                                                                                                                                                                                                                                                                                                          |     |                           |     |                         |     |                           |     |                     |     |                          |     |                     |     |                         |     |               |     |                 |     |              |     |                  |     |                   |     |                      |     |                      |     |                        |     |            |     |                      |     |                 |     |            |     |                 |     |              |     |              |     |                       |     |              |     |                   |     |           |     |                 |     |             |     |                    |     |                |     |                         |
| AMH | AveraMcKennan-ICU                                                                      |                                                                                    |                                                                                                                                                                                                                                                                                                                                                                                                                                                                                                                                                                                                                                                                                                                                                                                                                                                                                                                                                                                                                                                                                                                                                                                                                                                                                                                                                                                                                                                                                                                                                          |     |                           |     |                         |     |                           |     |                     |     |                          |     |                     |     |                         |     |               |     |                 |     |              |     |                  |     |                   |     |                      |     |                      |     |                        |     |            |     |                      |     |                 |     |            |     |                 |     |              |     |              |     |                       |     |              |     |                   |     |           |     |                 |     |             |     |                    |     |                |     |                         |
| BUT | Banner-CVICU                                                                           |                                                                                    |                                                                                                                                                                                                                                                                                                                                                                                                                                                                                                                                                                                                                                                                                                                                                                                                                                                                                                                                                                                                                                                                                                                                                                                                                                                                                                                                                                                                                                                                                                                                                          |     |                           |     |                         |     |                           |     |                     |     |                          |     |                     |     |                         |     |               |     |                 |     |              |     |                  |     |                   |     |                      |     |                      |     |                        |     |            |     |                      |     |                 |     |            |     |                 |     |              |     |              |     |                       |     |              |     |                   |     |           |     |                 |     |             |     |                    |     |                |     |                         |
| BMM | BaptistMemorial-ICU                                                                    |                                                                                    |                                                                                                                                                                                                                                                                                                                                                                                                                                                                                                                                                                                                                                                                                                                                                                                                                                                                                                                                                                                                                                                                                                                                                                                                                                                                                                                                                                                                                                                                                                                                                          |     |                           |     |                         |     |                           |     |                     |     |                          |     |                     |     |                         |     |               |     |                 |     |              |     |                  |     |                   |     |                      |     |                      |     |                        |     |            |     |                      |     |                 |     |            |     |                 |     |              |     |              |     |                       |     |              |     |                   |     |           |     |                 |     |             |     |                    |     |                |     |                         |
| BFP | BayfrontPetersburg-TICU                                                                |                                                                                    |                                                                                                                                                                                                                                                                                                                                                                                                                                                                                                                                                                                                                                                                                                                                                                                                                                                                                                                                                                                                                                                                                                                                                                                                                                                                                                                                                                                                                                                                                                                                                          |     |                           |     |                         |     |                           |     |                     |     |                          |     |                     |     |                         |     |               |     |                 |     |              |     |                  |     |                   |     |                      |     |                      |     |                        |     |            |     |                      |     |                 |     |            |     |                 |     |              |     |              |     |                       |     |              |     |                   |     |           |     |                 |     |             |     |                    |     |                |     |                         |
| BMC | BerkleyMC-ICU                                                                          |                                                                                    |                                                                                                                                                                                                                                                                                                                                                                                                                                                                                                                                                                                                                                                                                                                                                                                                                                                                                                                                                                                                                                                                                                                                                                                                                                                                                                                                                                                                                                                                                                                                                          |     |                           |     |                         |     |                           |     |                     |     |                          |     |                     |     |                         |     |               |     |                 |     |              |     |                  |     |                   |     |                      |     |                      |     |                        |     |            |     |                      |     |                 |     |            |     |                 |     |              |     |              |     |                       |     |              |     |                   |     |           |     |                 |     |             |     |                    |     |                |     |                         |
| BWH | Butterworth-MCC                                                                        |                                                                                    |                                                                                                                                                                                                                                                                                                                                                                                                                                                                                                                                                                                                                                                                                                                                                                                                                                                                                                                                                                                                                                                                                                                                                                                                                                                                                                                                                                                                                                                                                                                                                          |     |                           |     |                         |     |                           |     |                     |     |                          |     |                     |     |                         |     |               |     |                 |     |              |     |                  |     |                   |     |                      |     |                      |     |                        |     |            |     |                      |     |                 |     |            |     |                 |     |              |     |              |     |                       |     |              |     |                   |     |           |     |                 |     |             |     |                    |     |                |     |                         |
| CFV | CapeFear-ICU                                                                           |                                                                                    |                                                                                                                                                                                                                                                                                                                                                                                                                                                                                                                                                                                                                                                                                                                                                                                                                                                                                                                                                                                                                                                                                                                                                                                                                                                                                                                                                                                                                                                                                                                                                          |     |                           |     |                         |     |                           |     |                     |     |                          |     |                     |     |                         |     |               |     |                 |     |              |     |                  |     |                   |     |                      |     |                      |     |                        |     |            |     |                      |     |                 |     |            |     |                 |     |              |     |              |     |                       |     |              |     |                   |     |           |     |                 |     |             |     |                    |     |                |     |                         |
| CMC | CarolinasMC-NICU                                                                       |                                                                                    |                                                                                                                                                                                                                                                                                                                                                                                                                                                                                                                                                                                                                                                                                                                                                                                                                                                                                                                                                                                                                                                                                                                                                                                                                                                                                                                                                                                                                                                                                                                                                          |     |                           |     |                         |     |                           |     |                     |     |                          |     |                     |     |                         |     |               |     |                 |     |              |     |                  |     |                   |     |                      |     |                      |     |                        |     |            |     |                      |     |                 |     |            |     |                 |     |              |     |              |     |                       |     |              |     |                   |     |           |     |                 |     |             |     |                    |     |                |     |                         |
| CDS | CedarsSinai-CSICU                                                                      |                                                                                    |                                                                                                                                                                                                                                                                                                                                                                                                                                                                                                                                                                                                                                                                                                                                                                                                                                                                                                                                                                                                                                                                                                                                                                                                                                                                                                                                                                                                                                                                                                                                                          |     |                           |     |                         |     |                           |     |                     |     |                          |     |                     |     |                         |     |               |     |                 |     |              |     |                  |     |                   |     |                      |     |                      |     |                        |     |            |     |                      |     |                 |     |            |     |                 |     |              |     |              |     |                       |     |              |     |                   |     |           |     |                 |     |             |     |                    |     |                |     |                         |
| CLC | ClevelandClinic-SICU                                                                   |                                                                                    |                                                                                                                                                                                                                                                                                                                                                                                                                                                                                                                                                                                                                                                                                                                                                                                                                                                                                                                                                                                                                                                                                                                                                                                                                                                                                                                                                                                                                                                                                                                                                          |     |                           |     |                         |     |                           |     |                     |     |                          |     |                     |     |                         |     |               |     |                 |     |              |     |                  |     |                   |     |                      |     |                      |     |                        |     |            |     |                      |     |                 |     |            |     |                 |     |              |     |              |     |                       |     |              |     |                   |     |           |     |                 |     |             |     |                    |     |                |     |                         |
| CSM | ColumbiaStMarys-ICU4                                                                   |                                                                                    |                                                                                                                                                                                                                                                                                                                                                                                                                                                                                                                                                                                                                                                                                                                                                                                                                                                                                                                                                                                                                                                                                                                                                                                                                                                                                                                                                                                                                                                                                                                                                          |     |                           |     |                         |     |                           |     |                     |     |                          |     |                     |     |                         |     |               |     |                 |     |              |     |                  |     |                   |     |                      |     |                      |     |                        |     |            |     |                      |     |                 |     |            |     |                 |     |              |     |              |     |                       |     |              |     |                   |     |           |     |                 |     |             |     |                    |     |                |     |                         |
| COR | CommunityRegional-ICU5                                                                 |                                                                                    |                                                                                                                                                                                                                                                                                                                                                                                                                                                                                                                                                                                                                                                                                                                                                                                                                                                                                                                                                                                                                                                                                                                                                                                                                                                                                                                                                                                                                                                                                                                                                          |     |                           |     |                         |     |                           |     |                     |     |                          |     |                     |     |                         |     |               |     |                 |     |              |     |                  |     |                   |     |                      |     |                      |     |                        |     |            |     |                      |     |                 |     |            |     |                 |     |              |     |              |     |                       |     |              |     |                   |     |           |     |                 |     |             |     |                    |     |                |     |                         |
| CRM | Corona-ICU                                                                             |                                                                                    |                                                                                                                                                                                                                                                                                                                                                                                                                                                                                                                                                                                                                                                                                                                                                                                                                                                                                                                                                                                                                                                                                                                                                                                                                                                                                                                                                                                                                                                                                                                                                          |     |                           |     |                         |     |                           |     |                     |     |                          |     |                     |     |                         |     |               |     |                 |     |              |     |                  |     |                   |     |                      |     |                      |     |                        |     |            |     |                      |     |                 |     |            |     |                 |     |              |     |              |     |                       |     |              |     |                   |     |           |     |                 |     |             |     |                    |     |                |     |                         |
| DMH | Dartmouth-ICU 3NORTH                                                                   |                                                                                    |                                                                                                                                                                                                                                                                                                                                                                                                                                                                                                                                                                                                                                                                                                                                                                                                                                                                                                                                                                                                                                                                                                                                                                                                                                                                                                                                                                                                                                                                                                                                                          |     |                           |     |                         |     |                           |     |                     |     |                          |     |                     |     |                         |     |               |     |                 |     |              |     |                  |     |                   |     |                      |     |                      |     |                        |     |            |     |                      |     |                 |     |            |     |                 |     |              |     |              |     |                       |     |              |     |                   |     |           |     |                 |     |             |     |                    |     |                |     |                         |
| EWB | Edward-NEURO CV                                                                        |                                                                                    |                                                                                                                                                                                                                                                                                                                                                                                                                                                                                                                                                                                                                                                                                                                                                                                                                                                                                                                                                                                                                                                                                                                                                                                                                                                                                                                                                                                                                                                                                                                                                          |     |                           |     |                         |     |                           |     |                     |     |                          |     |                     |     |                         |     |               |     |                 |     |              |     |                  |     |                   |     |                      |     |                      |     |                        |     |            |     |                      |     |                 |     |            |     |                 |     |              |     |              |     |                       |     |              |     |                   |     |           |     |                 |     |             |     |                    |     |                |     |                         |
| EUH | Emory-MICU                                                                             |                                                                                    |                                                                                                                                                                                                                                                                                                                                                                                                                                                                                                                                                                                                                                                                                                                                                                                                                                                                                                                                                                                                                                                                                                                                                                                                                                                                                                                                                                                                                                                                                                                                                          |     |                           |     |                         |     |                           |     |                     |     |                          |     |                     |     |                         |     |               |     |                 |     |              |     |                  |     |                   |     |                      |     |                      |     |                        |     |            |     |                      |     |                 |     |            |     |                 |     |              |     |              |     |                       |     |              |     |                   |     |           |     |                 |     |             |     |                    |     |                |     |                         |
| FSF | Francisian-AICU                                                                        |                                                                                    |                                                                                                                                                                                                                                                                                                                                                                                                                                                                                                                                                                                                                                                                                                                                                                                                                                                                                                                                                                                                                                                                                                                                                                                                                                                                                                                                                                                                                                                                                                                                                          |     |                           |     |                         |     |                           |     |                     |     |                          |     |                     |     |                         |     |               |     |                 |     |              |     |                  |     |                   |     |                      |     |                      |     |                        |     |            |     |                      |     |                 |     |            |     |                 |     |              |     |              |     |                       |     |              |     |                   |     |           |     |                 |     |             |     |                    |     |                |     |                         |
| HRH | Hannibal-ICU                                                                           |                                                                                    |                                                                                                                                                                                                                                                                                                                                                                                                                                                                                                                                                                                                                                                                                                                                                                                                                                                                                                                                                                                                                                                                                                                                                                                                                                                                                                                                                                                                                                                                                                                                                          |     |                           |     |                         |     |                           |     |                     |     |                          |     |                     |     |                         |     |               |     |                 |     |              |     |                  |     |                   |     |                      |     |                      |     |                        |     |            |     |                      |     |                 |     |            |     |                 |     |              |     |              |     |                       |     |              |     |                   |     |           |     |                 |     |             |     |                    |     |                |     |                         |
| HMC | Harrison-ICU                                                                           |                                                                                    |                                                                                                                                                                                                                                                                                                                                                                                                                                                                                                                                                                                                                                                                                                                                                                                                                                                                                                                                                                                                                                                                                                                                                                                                                                                                                                                                                                                                                                                                                                                                                          |     |                           |     |                         |     |                           |     |                     |     |                          |     |                     |     |                         |     |               |     |                 |     |              |     |                  |     |                   |     |                      |     |                      |     |                        |     |            |     |                      |     |                 |     |            |     |                 |     |              |     |              |     |                       |     |              |     |                   |     |           |     |                 |     |             |     |                    |     |                |     |                         |
| HMH | HoustonMethodist-MICU                                                                  |                                                                                    |                                                                                                                                                                                                                                                                                                                                                                                                                                                                                                                                                                                                                                                                                                                                                                                                                                                                                                                                                                                                                                                                                                                                                                                                                                                                                                                                                                                                                                                                                                                                                          |     |                           |     |                         |     |                           |     |                     |     |                          |     |                     |     |                         |     |               |     |                 |     |              |     |                  |     |                   |     |                      |     |                      |     |                        |     |            |     |                      |     |                 |     |            |     |                 |     |              |     |              |     |                       |     |              |     |                   |     |           |     |                 |     |             |     |                    |     |                |     |                         |
| IUA | IndianaU-ICU                                                                           |                                                                                    |                                                                                                                                                                                                                                                                                                                                                                                                                                                                                                                                                                                                                                                                                                                                                                                                                                                                                                                                                                                                                                                                                                                                                                                                                                                                                                                                                                                                                                                                                                                                                          |     |                           |     |                         |     |                           |     |                     |     |                          |     |                     |     |                         |     |               |     |                 |     |              |     |                  |     |                   |     |                      |     |                      |     |                        |     |            |     |                      |     |                 |     |            |     |                 |     |              |     |              |     |                       |     |              |     |                   |     |           |     |                 |     |             |     |                    |     |                |     |                         |
| IMH | IowaMethodist-CCU                                                                      |                                                                                    |                                                                                                                                                                                                                                                                                                                                                                                                                                                                                                                                                                                                                                                                                                                                                                                                                                                                                                                                                                                                                                                                                                                                                                                                                                                                                                                                                                                                                                                                                                                                                          |     |                           |     |                         |     |                           |     |                     |     |                          |     |                     |     |                         |     |               |     |                 |     |              |     |                  |     |                   |     |                      |     |                      |     |                        |     |            |     |                      |     |                 |     |            |     |                 |     |              |     |              |     |                       |     |              |     |                   |     |           |     |                 |     |             |     |                    |     |                |     |                         |
| KEC | Keck-SICU                                                                              |                                                                                    |                                                                                                                                                                                                                                                                                                                                                                                                                                                                                                                                                                                                                                                                                                                                                                                                                                                                                                                                                                                                                                                                                                                                                                                                                                                                                                                                                                                                                                                                                                                                                          |     |                           |     |                         |     |                           |     |                     |     |                          |     |                     |     |                         |     |               |     |                 |     |              |     |                  |     |                   |     |                      |     |                      |     |                        |     |            |     |                      |     |                 |     |            |     |                 |     |              |     |              |     |                       |     |              |     |                   |     |           |     |                 |     |             |     |                    |     |                |     |                         |
| KMC | Kettering-MSICU                                                                        |                                                                                    |                                                                                                                                                                                                                                                                                                                                                                                                                                                                                                                                                                                                                                                                                                                                                                                                                                                                                                                                                                                                                                                                                                                                                                                                                                                                                                                                                                                                                                                                                                                                                          |     |                           |     |                         |     |                           |     |                     |     |                          |     |                     |     |                         |     |               |     |                 |     |              |     |                  |     |                   |     |                      |     |                      |     |                        |     |            |     |                      |     |                 |     |            |     |                 |     |              |     |              |     |                       |     |              |     |                   |     |           |     |                 |     |             |     |                    |     |                |     |                         |
| LAC | LACUSC-MICU                                                                            |                                                                                    |                                                                                                                                                                                                                                                                                                                                                                                                                                                                                                                                                                                                                                                                                                                                                                                                                                                                                                                                                                                                                                                                                                                                                                                                                                                                                                                                                                                                                                                                                                                                                          |     |                           |     |                         |     |                           |     |                     |     |                          |     |                     |     |                         |     |               |     |                 |     |              |     |                  |     |                   |     |                      |     |                      |     |                        |     |            |     |                      |     |                 |     |            |     |                 |     |              |     |              |     |                       |     |              |     |                   |     |           |     |                 |     |             |     |                    |     |                |     |                         |
| LCH | LakeCumberland-ICU                                                                     |                                                                                    |                                                                                                                                                                                                                                                                                                                                                                                                                                                                                                                                                                                                                                                                                                                                                                                                                                                                                                                                                                                                                                                                                                                                                                                                                                                                                                                                                                                                                                                                                                                                                          |     |                           |     |                         |     |                           |     |                     |     |                          |     |                     |     |                         |     |               |     |                 |     |              |     |                  |     |                   |     |                      |     |                      |     |                        |     |            |     |                      |     |                 |     |            |     |                 |     |              |     |              |     |                       |     |              |     |                   |     |           |     |                 |     |             |     |                    |     |                |     |                         |
| LRG | LakeRegion-ICU                                                                         |                                                                                    |                                                                                                                                                                                                                                                                                                                                                                                                                                                                                                                                                                                                                                                                                                                                                                                                                                                                                                                                                                                                                                                                                                                                                                                                                                                                                                                                                                                                                                                                                                                                                          |     |                           |     |                         |     |                           |     |                     |     |                          |     |                     |     |                         |     |               |     |                 |     |              |     |                  |     |                   |     |                      |     |                      |     |                        |     |            |     |                      |     |                 |     |            |     |                 |     |              |     |              |     |                       |     |              |     |                   |     |           |     |                 |     |             |     |                    |     |                |     |                         |
| MPH | MercyPhiladelphia-MSICU                                                                |                                                                                    |                                                                                                                                                                                                                                                                                                                                                                                                                                                                                                                                                                                                                                                                                                                                                                                                                                                                                                                                                                                                                                                                                                                                                                                                                                                                                                                                                                                                                                                                                                                                                          |     |                           |     |                         |     |                           |     |                     |     |                          |     |                     |     |                         |     |               |     |                 |     |              |     |                  |     |                   |     |                      |     |                      |     |                        |     |            |     |                      |     |                 |     |            |     |                 |     |              |     |              |     |                       |     |              |     |                   |     |           |     |                 |     |             |     |                    |     |                |     |                         |

|     |                        |
|-----|------------------------|
| MNH | Mission-MSICU          |
| NWH | Northwestern-MICU      |
| NHF | NovantForsyth-ICU      |
| NHP | NovantPres-ICU         |
| OSU | OhioState-MICU         |
| OUM | Oklahoma-TICU          |
| ORM | OrangeRegional-MICU    |
| OHS | Oregon-CVICU           |
| PMM | PaliMomi-ICU           |
| PKL | Parkland-SICU          |
| PCH | Parkview-ICU           |
| PPH | PhoebePutney-MICU      |
| PSP | ProvidencePatrick-ICU  |
| PPM | ProvidencePortland-ICU |
| RUH | Riverside-ACU          |
| RRM | RonaldReagan-CTICU     |
| RYM | RubyMemorial-MICU SICU |
| RUM | Rush-NICU              |
| SPC | SanPabloCaguas-NICU    |
| SMH | Sarasota-CCU           |
| SCV | ScrippsMercy-ICU       |
| SGH | SharpGrossmont-SICU    |
| SCH | SouthCounty-ICU        |
| SLH | StLuke-ICU             |
| SMM | SutterMemorial-ICU     |
| STC | SutterTracy-ICU        |
| TVM | TennesseeVA-MICU       |
| TVS | TennesseeVA-SICU       |
| TJU | ThomasJefferson-MICU   |
| USF | UCSanFran-ICU          |
| NXC | UMichigan-SICU         |
| UNC | UNC-MICU               |
| UWH | UWisconsin-TLC         |
| VAP | VAPaloAlto-MSICU       |
| VMM | VirginiaMason-CCU      |
| WHH | Washington-CCU         |
| WCH | Wooster-ICU            |

Custom alignment: RH

|     |                           |                                                                                       |                                                                 |
|-----|---------------------------|---------------------------------------------------------------------------------------|-----------------------------------------------------------------|
| 477 | section_11_team_num       | How many team members participated in completion of this survey (up to maximum of 4)? | text (number, Min: 1, Max: 4), Required<br>Custom alignment: RH |
| 478 | section_11_person_1_name  | Name of primary person (team member one) responsible for data entry                   | text, Required<br>Custom alignment: RH                          |
| 479 | section_11_person_1_email | E-mail of primary person (team member one) responsible for data entry                 | text (email), Required<br>Custom alignment: RH                  |

|     |                                                |                                                                                                                                    |                                                                                                                                                                                                                                                                                                                                                                                                                                                                                                                                                                                                                                                                                                                                                                                                                                                                                                                                                                                                                                                                                                                                                                                                                                                                                                                                                                                                                                                                                                                                                                                                                                                                                                                                                                                                                                                                                                                                                                                                                                                                                                                                                                                                                                                                                                                 |   |                                         |                                                     |                        |                                         |                                                                                                       |   |                                         |                                                                                       |                           |                                         |                                         |   |                                         |                                                                                                   |                |                                         |                                                             |    |                                         |                                                            |                            |                                         |                                                                                             |    |                                                |       |       |
|-----|------------------------------------------------|------------------------------------------------------------------------------------------------------------------------------------|-----------------------------------------------------------------------------------------------------------------------------------------------------------------------------------------------------------------------------------------------------------------------------------------------------------------------------------------------------------------------------------------------------------------------------------------------------------------------------------------------------------------------------------------------------------------------------------------------------------------------------------------------------------------------------------------------------------------------------------------------------------------------------------------------------------------------------------------------------------------------------------------------------------------------------------------------------------------------------------------------------------------------------------------------------------------------------------------------------------------------------------------------------------------------------------------------------------------------------------------------------------------------------------------------------------------------------------------------------------------------------------------------------------------------------------------------------------------------------------------------------------------------------------------------------------------------------------------------------------------------------------------------------------------------------------------------------------------------------------------------------------------------------------------------------------------------------------------------------------------------------------------------------------------------------------------------------------------------------------------------------------------------------------------------------------------------------------------------------------------------------------------------------------------------------------------------------------------------------------------------------------------------------------------------------------------|---|-----------------------------------------|-----------------------------------------------------|------------------------|-----------------------------------------|-------------------------------------------------------------------------------------------------------|---|-----------------------------------------|---------------------------------------------------------------------------------------|---------------------------|-----------------------------------------|-----------------------------------------|---|-----------------------------------------|---------------------------------------------------------------------------------------------------|----------------|-----------------------------------------|-------------------------------------------------------------|----|-----------------------------------------|------------------------------------------------------------|----------------------------|-----------------------------------------|---------------------------------------------------------------------------------------------|----|------------------------------------------------|-------|-------|
| 480 | section_11_person_1_profession                 | Profession of team member one                                                                                                      | <p>radio, Required</p> <table border="1"> <tr><td>1</td><td>ICU Registered Nurse (bedside provider)</td></tr> <tr><td>2</td><td>ICU Nurse Practitioner</td></tr> <tr><td>3</td><td>ICU Nurse Manager/Director</td></tr> <tr><td>4</td><td>Nurse Educator</td></tr> <tr><td>5</td><td>Clinical Nurse Specialist</td></tr> <tr><td>6</td><td>ICU Physician (bedside provider)</td></tr> <tr><td>7</td><td>ICU Physician Director/Manager</td></tr> <tr><td>8</td><td>ICU Pharmacist</td></tr> <tr><td>9</td><td>ICU Respiratory Therapist</td></tr> <tr><td>10</td><td>ICU Physical Therapist</td></tr> <tr><td>11</td><td>ICU Occupational Therapist</td></tr> <tr><td>12</td><td>Informational Technology</td></tr> <tr><td>13</td><td>Patient Safety/Quality Improvement Specialists</td></tr> <tr><td>14</td><td>Other</td></tr> </table>                                                                                                                                                                                                                                                                                                                                                                                                                                                                                                                                                                                                                                                                                                                                                                                                                                                                                                                                                                                                                                                                                                                                                                                                                                                                                                                                                                                                                                                                     | 1 | ICU Registered Nurse (bedside provider) | 2                                                   | ICU Nurse Practitioner | 3                                       | ICU Nurse Manager/Director                                                                            | 4 | Nurse Educator                          | 5                                                                                     | Clinical Nurse Specialist | 6                                       | ICU Physician (bedside provider)        | 7 | ICU Physician Director/Manager          | 8                                                                                                 | ICU Pharmacist | 9                                       | ICU Respiratory Therapist                                   | 10 | ICU Physical Therapist                  | 11                                                         | ICU Occupational Therapist | 12                                      | Informational Technology                                                                    | 13 | Patient Safety/Quality Improvement Specialists | 14    | Other |
| 1   | ICU Registered Nurse (bedside provider)        |                                                                                                                                    |                                                                                                                                                                                                                                                                                                                                                                                                                                                                                                                                                                                                                                                                                                                                                                                                                                                                                                                                                                                                                                                                                                                                                                                                                                                                                                                                                                                                                                                                                                                                                                                                                                                                                                                                                                                                                                                                                                                                                                                                                                                                                                                                                                                                                                                                                                                 |   |                                         |                                                     |                        |                                         |                                                                                                       |   |                                         |                                                                                       |                           |                                         |                                         |   |                                         |                                                                                                   |                |                                         |                                                             |    |                                         |                                                            |                            |                                         |                                                                                             |    |                                                |       |       |
| 2   | ICU Nurse Practitioner                         |                                                                                                                                    |                                                                                                                                                                                                                                                                                                                                                                                                                                                                                                                                                                                                                                                                                                                                                                                                                                                                                                                                                                                                                                                                                                                                                                                                                                                                                                                                                                                                                                                                                                                                                                                                                                                                                                                                                                                                                                                                                                                                                                                                                                                                                                                                                                                                                                                                                                                 |   |                                         |                                                     |                        |                                         |                                                                                                       |   |                                         |                                                                                       |                           |                                         |                                         |   |                                         |                                                                                                   |                |                                         |                                                             |    |                                         |                                                            |                            |                                         |                                                                                             |    |                                                |       |       |
| 3   | ICU Nurse Manager/Director                     |                                                                                                                                    |                                                                                                                                                                                                                                                                                                                                                                                                                                                                                                                                                                                                                                                                                                                                                                                                                                                                                                                                                                                                                                                                                                                                                                                                                                                                                                                                                                                                                                                                                                                                                                                                                                                                                                                                                                                                                                                                                                                                                                                                                                                                                                                                                                                                                                                                                                                 |   |                                         |                                                     |                        |                                         |                                                                                                       |   |                                         |                                                                                       |                           |                                         |                                         |   |                                         |                                                                                                   |                |                                         |                                                             |    |                                         |                                                            |                            |                                         |                                                                                             |    |                                                |       |       |
| 4   | Nurse Educator                                 |                                                                                                                                    |                                                                                                                                                                                                                                                                                                                                                                                                                                                                                                                                                                                                                                                                                                                                                                                                                                                                                                                                                                                                                                                                                                                                                                                                                                                                                                                                                                                                                                                                                                                                                                                                                                                                                                                                                                                                                                                                                                                                                                                                                                                                                                                                                                                                                                                                                                                 |   |                                         |                                                     |                        |                                         |                                                                                                       |   |                                         |                                                                                       |                           |                                         |                                         |   |                                         |                                                                                                   |                |                                         |                                                             |    |                                         |                                                            |                            |                                         |                                                                                             |    |                                                |       |       |
| 5   | Clinical Nurse Specialist                      |                                                                                                                                    |                                                                                                                                                                                                                                                                                                                                                                                                                                                                                                                                                                                                                                                                                                                                                                                                                                                                                                                                                                                                                                                                                                                                                                                                                                                                                                                                                                                                                                                                                                                                                                                                                                                                                                                                                                                                                                                                                                                                                                                                                                                                                                                                                                                                                                                                                                                 |   |                                         |                                                     |                        |                                         |                                                                                                       |   |                                         |                                                                                       |                           |                                         |                                         |   |                                         |                                                                                                   |                |                                         |                                                             |    |                                         |                                                            |                            |                                         |                                                                                             |    |                                                |       |       |
| 6   | ICU Physician (bedside provider)               |                                                                                                                                    |                                                                                                                                                                                                                                                                                                                                                                                                                                                                                                                                                                                                                                                                                                                                                                                                                                                                                                                                                                                                                                                                                                                                                                                                                                                                                                                                                                                                                                                                                                                                                                                                                                                                                                                                                                                                                                                                                                                                                                                                                                                                                                                                                                                                                                                                                                                 |   |                                         |                                                     |                        |                                         |                                                                                                       |   |                                         |                                                                                       |                           |                                         |                                         |   |                                         |                                                                                                   |                |                                         |                                                             |    |                                         |                                                            |                            |                                         |                                                                                             |    |                                                |       |       |
| 7   | ICU Physician Director/Manager                 |                                                                                                                                    |                                                                                                                                                                                                                                                                                                                                                                                                                                                                                                                                                                                                                                                                                                                                                                                                                                                                                                                                                                                                                                                                                                                                                                                                                                                                                                                                                                                                                                                                                                                                                                                                                                                                                                                                                                                                                                                                                                                                                                                                                                                                                                                                                                                                                                                                                                                 |   |                                         |                                                     |                        |                                         |                                                                                                       |   |                                         |                                                                                       |                           |                                         |                                         |   |                                         |                                                                                                   |                |                                         |                                                             |    |                                         |                                                            |                            |                                         |                                                                                             |    |                                                |       |       |
| 8   | ICU Pharmacist                                 |                                                                                                                                    |                                                                                                                                                                                                                                                                                                                                                                                                                                                                                                                                                                                                                                                                                                                                                                                                                                                                                                                                                                                                                                                                                                                                                                                                                                                                                                                                                                                                                                                                                                                                                                                                                                                                                                                                                                                                                                                                                                                                                                                                                                                                                                                                                                                                                                                                                                                 |   |                                         |                                                     |                        |                                         |                                                                                                       |   |                                         |                                                                                       |                           |                                         |                                         |   |                                         |                                                                                                   |                |                                         |                                                             |    |                                         |                                                            |                            |                                         |                                                                                             |    |                                                |       |       |
| 9   | ICU Respiratory Therapist                      |                                                                                                                                    |                                                                                                                                                                                                                                                                                                                                                                                                                                                                                                                                                                                                                                                                                                                                                                                                                                                                                                                                                                                                                                                                                                                                                                                                                                                                                                                                                                                                                                                                                                                                                                                                                                                                                                                                                                                                                                                                                                                                                                                                                                                                                                                                                                                                                                                                                                                 |   |                                         |                                                     |                        |                                         |                                                                                                       |   |                                         |                                                                                       |                           |                                         |                                         |   |                                         |                                                                                                   |                |                                         |                                                             |    |                                         |                                                            |                            |                                         |                                                                                             |    |                                                |       |       |
| 10  | ICU Physical Therapist                         |                                                                                                                                    |                                                                                                                                                                                                                                                                                                                                                                                                                                                                                                                                                                                                                                                                                                                                                                                                                                                                                                                                                                                                                                                                                                                                                                                                                                                                                                                                                                                                                                                                                                                                                                                                                                                                                                                                                                                                                                                                                                                                                                                                                                                                                                                                                                                                                                                                                                                 |   |                                         |                                                     |                        |                                         |                                                                                                       |   |                                         |                                                                                       |                           |                                         |                                         |   |                                         |                                                                                                   |                |                                         |                                                             |    |                                         |                                                            |                            |                                         |                                                                                             |    |                                                |       |       |
| 11  | ICU Occupational Therapist                     |                                                                                                                                    |                                                                                                                                                                                                                                                                                                                                                                                                                                                                                                                                                                                                                                                                                                                                                                                                                                                                                                                                                                                                                                                                                                                                                                                                                                                                                                                                                                                                                                                                                                                                                                                                                                                                                                                                                                                                                                                                                                                                                                                                                                                                                                                                                                                                                                                                                                                 |   |                                         |                                                     |                        |                                         |                                                                                                       |   |                                         |                                                                                       |                           |                                         |                                         |   |                                         |                                                                                                   |                |                                         |                                                             |    |                                         |                                                            |                            |                                         |                                                                                             |    |                                                |       |       |
| 12  | Informational Technology                       |                                                                                                                                    |                                                                                                                                                                                                                                                                                                                                                                                                                                                                                                                                                                                                                                                                                                                                                                                                                                                                                                                                                                                                                                                                                                                                                                                                                                                                                                                                                                                                                                                                                                                                                                                                                                                                                                                                                                                                                                                                                                                                                                                                                                                                                                                                                                                                                                                                                                                 |   |                                         |                                                     |                        |                                         |                                                                                                       |   |                                         |                                                                                       |                           |                                         |                                         |   |                                         |                                                                                                   |                |                                         |                                                             |    |                                         |                                                            |                            |                                         |                                                                                             |    |                                                |       |       |
| 13  | Patient Safety/Quality Improvement Specialists |                                                                                                                                    |                                                                                                                                                                                                                                                                                                                                                                                                                                                                                                                                                                                                                                                                                                                                                                                                                                                                                                                                                                                                                                                                                                                                                                                                                                                                                                                                                                                                                                                                                                                                                                                                                                                                                                                                                                                                                                                                                                                                                                                                                                                                                                                                                                                                                                                                                                                 |   |                                         |                                                     |                        |                                         |                                                                                                       |   |                                         |                                                                                       |                           |                                         |                                         |   |                                         |                                                                                                   |                |                                         |                                                             |    |                                         |                                                            |                            |                                         |                                                                                             |    |                                                |       |       |
| 14  | Other                                          |                                                                                                                                    |                                                                                                                                                                                                                                                                                                                                                                                                                                                                                                                                                                                                                                                                                                                                                                                                                                                                                                                                                                                                                                                                                                                                                                                                                                                                                                                                                                                                                                                                                                                                                                                                                                                                                                                                                                                                                                                                                                                                                                                                                                                                                                                                                                                                                                                                                                                 |   |                                         |                                                     |                        |                                         |                                                                                                       |   |                                         |                                                                                       |                           |                                         |                                         |   |                                         |                                                                                                   |                |                                         |                                                             |    |                                         |                                                            |                            |                                         |                                                                                             |    |                                                |       |       |
| 481 | section_11_person_1_work                       | Did team member one work in participating ICU during the course of the SCCM ICU Liberation Collaborative?                          | <p>yesno, Required</p> <table border="1"> <tr><td>1</td><td>Yes</td></tr> <tr><td>0</td><td>No</td></tr> </table> <p>Custom alignment: RH</p>                                                                                                                                                                                                                                                                                                                                                                                                                                                                                                                                                                                                                                                                                                                                                                                                                                                                                                                                                                                                                                                                                                                                                                                                                                                                                                                                                                                                                                                                                                                                                                                                                                                                                                                                                                                                                                                                                                                                                                                                                                                                                                                                                                   | 1 | Yes                                     | 0                                                   | No                     |                                         |                                                                                                       |   |                                         |                                                                                       |                           |                                         |                                         |   |                                         |                                                                                                   |                |                                         |                                                             |    |                                         |                                                            |                            |                                         |                                                                                             |    |                                                |       |       |
| 1   | Yes                                            |                                                                                                                                    |                                                                                                                                                                                                                                                                                                                                                                                                                                                                                                                                                                                                                                                                                                                                                                                                                                                                                                                                                                                                                                                                                                                                                                                                                                                                                                                                                                                                                                                                                                                                                                                                                                                                                                                                                                                                                                                                                                                                                                                                                                                                                                                                                                                                                                                                                                                 |   |                                         |                                                     |                        |                                         |                                                                                                       |   |                                         |                                                                                       |                           |                                         |                                         |   |                                         |                                                                                                   |                |                                         |                                                             |    |                                         |                                                            |                            |                                         |                                                                                             |    |                                                |       |       |
| 0   | No                                             |                                                                                                                                    |                                                                                                                                                                                                                                                                                                                                                                                                                                                                                                                                                                                                                                                                                                                                                                                                                                                                                                                                                                                                                                                                                                                                                                                                                                                                                                                                                                                                                                                                                                                                                                                                                                                                                                                                                                                                                                                                                                                                                                                                                                                                                                                                                                                                                                                                                                                 |   |                                         |                                                     |                        |                                         |                                                                                                       |   |                                         |                                                                                       |                           |                                         |                                         |   |                                         |                                                                                                   |                |                                         |                                                             |    |                                         |                                                            |                            |                                         |                                                                                             |    |                                                |       |       |
| 482 | section_11_person_1_exp                        | Team member one current years of professional experience                                                                           | <p>text (number, Min: 1, Max: 99), Required</p> <p>Custom alignment: RH</p>                                                                                                                                                                                                                                                                                                                                                                                                                                                                                                                                                                                                                                                                                                                                                                                                                                                                                                                                                                                                                                                                                                                                                                                                                                                                                                                                                                                                                                                                                                                                                                                                                                                                                                                                                                                                                                                                                                                                                                                                                                                                                                                                                                                                                                     |   |                                         |                                                     |                        |                                         |                                                                                                       |   |                                         |                                                                                       |                           |                                         |                                         |   |                                         |                                                                                                   |                |                                         |                                                             |    |                                         |                                                            |                            |                                         |                                                                                             |    |                                                |       |       |
| 483 | section_11_person_1_responsibilities           | What responsibilities did team member one hold during the course of the SCCM ICU Liberation collaborative? (select all that apply) | <p>checkbox, Required</p> <table border="1"> <tr> <td data-bbox="1040 890 1068 974">1</td> <td data-bbox="1068 890 1430 974">section_11_person_1_responsibilities__1</td> <td data-bbox="1430 890 1533 974">Core ICU Liberation team leader (Regional Champion)</td> </tr> <tr> <td data-bbox="1040 974 1068 1184">2</td> <td data-bbox="1068 974 1430 1184">section_11_person_1_responsibilities__2</td> <td data-bbox="1430 974 1533 1184">Core ICU Liberation team leader (attended a minimum of 1 person ICU Liberation Collaborative meeting)</td> </tr> <tr> <td data-bbox="1040 1184 1068 1346">3</td> <td data-bbox="1068 1184 1430 1346">section_11_person_1_responsibilities__3</td> <td data-bbox="1430 1184 1533 1346">Core ICU Liberation team leader (attend any in-ICU Liberation Collaborative meetings)</td> </tr> <tr> <td data-bbox="1040 1346 1068 1430">4</td> <td data-bbox="1068 1346 1430 1430">section_11_person_1_responsibilities__4</td> <td data-bbox="1430 1346 1533 1430">Participating in ABCDEF bundle champion</td> </tr> <tr> <td data-bbox="1040 1430 1068 1570">5</td> <td data-bbox="1068 1430 1430 1570">section_11_person_1_responsibilities__5</td> <td data-bbox="1430 1430 1533 1570">Responsible for training/education of other ICU clinicians on ABCDEF bundle at participating site</td> </tr> <tr> <td data-bbox="1040 1570 1068 1682">6</td> <td data-bbox="1068 1570 1430 1682">section_11_person_1_responsibilities__6</td> <td data-bbox="1430 1570 1533 1682">Responsible for Liberation Collaborative collection efforts</td> </tr> <tr> <td data-bbox="1040 1682 1068 1793">7</td> <td data-bbox="1068 1682 1430 1793">section_11_person_1_responsibilities__7</td> <td data-bbox="1430 1682 1533 1793">Revising participating site ABCDEF bundle related policies</td> </tr> <tr> <td data-bbox="1040 1793 1068 1982">8</td> <td data-bbox="1068 1793 1430 1982">section_11_person_1_responsibilities__8</td> <td data-bbox="1430 1793 1533 1982">Communicating with hospital administrator regarding ABC bundle implementation efforts/needs</td> </tr> <tr> <td data-bbox="1040 1982 1068 2022">9</td> <td data-bbox="1068 1982 1430 2022">section_11_person_1_responsibilities__9</td> <td data-bbox="1430 1982 1533 2022">Other</td> </tr> </table> | 1 | section_11_person_1_responsibilities__1 | Core ICU Liberation team leader (Regional Champion) | 2                      | section_11_person_1_responsibilities__2 | Core ICU Liberation team leader (attended a minimum of 1 person ICU Liberation Collaborative meeting) | 3 | section_11_person_1_responsibilities__3 | Core ICU Liberation team leader (attend any in-ICU Liberation Collaborative meetings) | 4                         | section_11_person_1_responsibilities__4 | Participating in ABCDEF bundle champion | 5 | section_11_person_1_responsibilities__5 | Responsible for training/education of other ICU clinicians on ABCDEF bundle at participating site | 6              | section_11_person_1_responsibilities__6 | Responsible for Liberation Collaborative collection efforts | 7  | section_11_person_1_responsibilities__7 | Revising participating site ABCDEF bundle related policies | 8                          | section_11_person_1_responsibilities__8 | Communicating with hospital administrator regarding ABC bundle implementation efforts/needs | 9  | section_11_person_1_responsibilities__9        | Other |       |
| 1   | section_11_person_1_responsibilities__1        | Core ICU Liberation team leader (Regional Champion)                                                                                |                                                                                                                                                                                                                                                                                                                                                                                                                                                                                                                                                                                                                                                                                                                                                                                                                                                                                                                                                                                                                                                                                                                                                                                                                                                                                                                                                                                                                                                                                                                                                                                                                                                                                                                                                                                                                                                                                                                                                                                                                                                                                                                                                                                                                                                                                                                 |   |                                         |                                                     |                        |                                         |                                                                                                       |   |                                         |                                                                                       |                           |                                         |                                         |   |                                         |                                                                                                   |                |                                         |                                                             |    |                                         |                                                            |                            |                                         |                                                                                             |    |                                                |       |       |
| 2   | section_11_person_1_responsibilities__2        | Core ICU Liberation team leader (attended a minimum of 1 person ICU Liberation Collaborative meeting)                              |                                                                                                                                                                                                                                                                                                                                                                                                                                                                                                                                                                                                                                                                                                                                                                                                                                                                                                                                                                                                                                                                                                                                                                                                                                                                                                                                                                                                                                                                                                                                                                                                                                                                                                                                                                                                                                                                                                                                                                                                                                                                                                                                                                                                                                                                                                                 |   |                                         |                                                     |                        |                                         |                                                                                                       |   |                                         |                                                                                       |                           |                                         |                                         |   |                                         |                                                                                                   |                |                                         |                                                             |    |                                         |                                                            |                            |                                         |                                                                                             |    |                                                |       |       |
| 3   | section_11_person_1_responsibilities__3        | Core ICU Liberation team leader (attend any in-ICU Liberation Collaborative meetings)                                              |                                                                                                                                                                                                                                                                                                                                                                                                                                                                                                                                                                                                                                                                                                                                                                                                                                                                                                                                                                                                                                                                                                                                                                                                                                                                                                                                                                                                                                                                                                                                                                                                                                                                                                                                                                                                                                                                                                                                                                                                                                                                                                                                                                                                                                                                                                                 |   |                                         |                                                     |                        |                                         |                                                                                                       |   |                                         |                                                                                       |                           |                                         |                                         |   |                                         |                                                                                                   |                |                                         |                                                             |    |                                         |                                                            |                            |                                         |                                                                                             |    |                                                |       |       |
| 4   | section_11_person_1_responsibilities__4        | Participating in ABCDEF bundle champion                                                                                            |                                                                                                                                                                                                                                                                                                                                                                                                                                                                                                                                                                                                                                                                                                                                                                                                                                                                                                                                                                                                                                                                                                                                                                                                                                                                                                                                                                                                                                                                                                                                                                                                                                                                                                                                                                                                                                                                                                                                                                                                                                                                                                                                                                                                                                                                                                                 |   |                                         |                                                     |                        |                                         |                                                                                                       |   |                                         |                                                                                       |                           |                                         |                                         |   |                                         |                                                                                                   |                |                                         |                                                             |    |                                         |                                                            |                            |                                         |                                                                                             |    |                                                |       |       |
| 5   | section_11_person_1_responsibilities__5        | Responsible for training/education of other ICU clinicians on ABCDEF bundle at participating site                                  |                                                                                                                                                                                                                                                                                                                                                                                                                                                                                                                                                                                                                                                                                                                                                                                                                                                                                                                                                                                                                                                                                                                                                                                                                                                                                                                                                                                                                                                                                                                                                                                                                                                                                                                                                                                                                                                                                                                                                                                                                                                                                                                                                                                                                                                                                                                 |   |                                         |                                                     |                        |                                         |                                                                                                       |   |                                         |                                                                                       |                           |                                         |                                         |   |                                         |                                                                                                   |                |                                         |                                                             |    |                                         |                                                            |                            |                                         |                                                                                             |    |                                                |       |       |
| 6   | section_11_person_1_responsibilities__6        | Responsible for Liberation Collaborative collection efforts                                                                        |                                                                                                                                                                                                                                                                                                                                                                                                                                                                                                                                                                                                                                                                                                                                                                                                                                                                                                                                                                                                                                                                                                                                                                                                                                                                                                                                                                                                                                                                                                                                                                                                                                                                                                                                                                                                                                                                                                                                                                                                                                                                                                                                                                                                                                                                                                                 |   |                                         |                                                     |                        |                                         |                                                                                                       |   |                                         |                                                                                       |                           |                                         |                                         |   |                                         |                                                                                                   |                |                                         |                                                             |    |                                         |                                                            |                            |                                         |                                                                                             |    |                                                |       |       |
| 7   | section_11_person_1_responsibilities__7        | Revising participating site ABCDEF bundle related policies                                                                         |                                                                                                                                                                                                                                                                                                                                                                                                                                                                                                                                                                                                                                                                                                                                                                                                                                                                                                                                                                                                                                                                                                                                                                                                                                                                                                                                                                                                                                                                                                                                                                                                                                                                                                                                                                                                                                                                                                                                                                                                                                                                                                                                                                                                                                                                                                                 |   |                                         |                                                     |                        |                                         |                                                                                                       |   |                                         |                                                                                       |                           |                                         |                                         |   |                                         |                                                                                                   |                |                                         |                                                             |    |                                         |                                                            |                            |                                         |                                                                                             |    |                                                |       |       |
| 8   | section_11_person_1_responsibilities__8        | Communicating with hospital administrator regarding ABC bundle implementation efforts/needs                                        |                                                                                                                                                                                                                                                                                                                                                                                                                                                                                                                                                                                                                                                                                                                                                                                                                                                                                                                                                                                                                                                                                                                                                                                                                                                                                                                                                                                                                                                                                                                                                                                                                                                                                                                                                                                                                                                                                                                                                                                                                                                                                                                                                                                                                                                                                                                 |   |                                         |                                                     |                        |                                         |                                                                                                       |   |                                         |                                                                                       |                           |                                         |                                         |   |                                         |                                                                                                   |                |                                         |                                                             |    |                                         |                                                            |                            |                                         |                                                                                             |    |                                                |       |       |
| 9   | section_11_person_1_responsibilities__9        | Other                                                                                                                              |                                                                                                                                                                                                                                                                                                                                                                                                                                                                                                                                                                                                                                                                                                                                                                                                                                                                                                                                                                                                                                                                                                                                                                                                                                                                                                                                                                                                                                                                                                                                                                                                                                                                                                                                                                                                                                                                                                                                                                                                                                                                                                                                                                                                                                                                                                                 |   |                                         |                                                     |                        |                                         |                                                                                                       |   |                                         |                                                                                       |                           |                                         |                                         |   |                                         |                                                                                                   |                |                                         |                                                             |    |                                         |                                                            |                            |                                         |                                                                                             |    |                                                |       |       |



|     |                                                                                                                  |                                                                                                           |                                                                                                                                                                                                                                                                                                                                                                                                                                                                                                                                                                                                                                                                                                                                                                                                                                         |   |                                         |   |                        |   |                            |   |                |   |                           |   |                                  |   |                                |   |                |   |                           |    |                        |    |                            |    |                          |    |                                                |    |       |
|-----|------------------------------------------------------------------------------------------------------------------|-----------------------------------------------------------------------------------------------------------|-----------------------------------------------------------------------------------------------------------------------------------------------------------------------------------------------------------------------------------------------------------------------------------------------------------------------------------------------------------------------------------------------------------------------------------------------------------------------------------------------------------------------------------------------------------------------------------------------------------------------------------------------------------------------------------------------------------------------------------------------------------------------------------------------------------------------------------------|---|-----------------------------------------|---|------------------------|---|----------------------------|---|----------------|---|---------------------------|---|----------------------------------|---|--------------------------------|---|----------------|---|---------------------------|----|------------------------|----|----------------------------|----|--------------------------|----|------------------------------------------------|----|-------|
| 484 | section_11_person_1_other_res<br>p<br>Show the field ONLY if:<br>[section_11_person_1_responsibilities(9)] = '1' | Please specify other responsibilities:                                                                    | text, Required                                                                                                                                                                                                                                                                                                                                                                                                                                                                                                                                                                                                                                                                                                                                                                                                                          |   |                                         |   |                        |   |                            |   |                |   |                           |   |                                  |   |                                |   |                |   |                           |    |                        |    |                            |    |                          |    |                                                |    |       |
| 485 | section_11_person_2_name<br>Show the field ONLY if:<br>[section_11_team_num] > 1                                 | Name of team member two                                                                                   | text, Required<br>Custom alignment: RH                                                                                                                                                                                                                                                                                                                                                                                                                                                                                                                                                                                                                                                                                                                                                                                                  |   |                                         |   |                        |   |                            |   |                |   |                           |   |                                  |   |                                |   |                |   |                           |    |                        |    |                            |    |                          |    |                                                |    |       |
| 486 | section_11_person_2_email<br>Show the field ONLY if:<br>[section_11_team_num] > 1                                | E-mail of team member two                                                                                 | text (email), Required<br>Custom alignment: RH                                                                                                                                                                                                                                                                                                                                                                                                                                                                                                                                                                                                                                                                                                                                                                                          |   |                                         |   |                        |   |                            |   |                |   |                           |   |                                  |   |                                |   |                |   |                           |    |                        |    |                            |    |                          |    |                                                |    |       |
| 487 | section_11_person_2_profession<br>Show the field ONLY if:<br>[section_11_team_num] > 1                           | Profession of team member two                                                                             | radio, Required<br><table border="1"> <tr><td>1</td><td>ICU Registered Nurse (bedside provider)</td></tr> <tr><td>2</td><td>ICU Nurse Practitioner</td></tr> <tr><td>3</td><td>ICU Nurse Manager/Director</td></tr> <tr><td>4</td><td>Nurse Educator</td></tr> <tr><td>5</td><td>Clinical Nurse Specialist</td></tr> <tr><td>6</td><td>ICU Physician (bedside provider)</td></tr> <tr><td>7</td><td>ICU Physician Director/Manager</td></tr> <tr><td>8</td><td>ICU Pharmacist</td></tr> <tr><td>9</td><td>ICU Respiratory Therapist</td></tr> <tr><td>10</td><td>ICU Physical Therapist</td></tr> <tr><td>11</td><td>ICU Occupational Therapist</td></tr> <tr><td>12</td><td>Informational Technology</td></tr> <tr><td>13</td><td>Patient Safety/Quality Improvement Specialists</td></tr> <tr><td>14</td><td>Other</td></tr> </table> | 1 | ICU Registered Nurse (bedside provider) | 2 | ICU Nurse Practitioner | 3 | ICU Nurse Manager/Director | 4 | Nurse Educator | 5 | Clinical Nurse Specialist | 6 | ICU Physician (bedside provider) | 7 | ICU Physician Director/Manager | 8 | ICU Pharmacist | 9 | ICU Respiratory Therapist | 10 | ICU Physical Therapist | 11 | ICU Occupational Therapist | 12 | Informational Technology | 13 | Patient Safety/Quality Improvement Specialists | 14 | Other |
| 1   | ICU Registered Nurse (bedside provider)                                                                          |                                                                                                           |                                                                                                                                                                                                                                                                                                                                                                                                                                                                                                                                                                                                                                                                                                                                                                                                                                         |   |                                         |   |                        |   |                            |   |                |   |                           |   |                                  |   |                                |   |                |   |                           |    |                        |    |                            |    |                          |    |                                                |    |       |
| 2   | ICU Nurse Practitioner                                                                                           |                                                                                                           |                                                                                                                                                                                                                                                                                                                                                                                                                                                                                                                                                                                                                                                                                                                                                                                                                                         |   |                                         |   |                        |   |                            |   |                |   |                           |   |                                  |   |                                |   |                |   |                           |    |                        |    |                            |    |                          |    |                                                |    |       |
| 3   | ICU Nurse Manager/Director                                                                                       |                                                                                                           |                                                                                                                                                                                                                                                                                                                                                                                                                                                                                                                                                                                                                                                                                                                                                                                                                                         |   |                                         |   |                        |   |                            |   |                |   |                           |   |                                  |   |                                |   |                |   |                           |    |                        |    |                            |    |                          |    |                                                |    |       |
| 4   | Nurse Educator                                                                                                   |                                                                                                           |                                                                                                                                                                                                                                                                                                                                                                                                                                                                                                                                                                                                                                                                                                                                                                                                                                         |   |                                         |   |                        |   |                            |   |                |   |                           |   |                                  |   |                                |   |                |   |                           |    |                        |    |                            |    |                          |    |                                                |    |       |
| 5   | Clinical Nurse Specialist                                                                                        |                                                                                                           |                                                                                                                                                                                                                                                                                                                                                                                                                                                                                                                                                                                                                                                                                                                                                                                                                                         |   |                                         |   |                        |   |                            |   |                |   |                           |   |                                  |   |                                |   |                |   |                           |    |                        |    |                            |    |                          |    |                                                |    |       |
| 6   | ICU Physician (bedside provider)                                                                                 |                                                                                                           |                                                                                                                                                                                                                                                                                                                                                                                                                                                                                                                                                                                                                                                                                                                                                                                                                                         |   |                                         |   |                        |   |                            |   |                |   |                           |   |                                  |   |                                |   |                |   |                           |    |                        |    |                            |    |                          |    |                                                |    |       |
| 7   | ICU Physician Director/Manager                                                                                   |                                                                                                           |                                                                                                                                                                                                                                                                                                                                                                                                                                                                                                                                                                                                                                                                                                                                                                                                                                         |   |                                         |   |                        |   |                            |   |                |   |                           |   |                                  |   |                                |   |                |   |                           |    |                        |    |                            |    |                          |    |                                                |    |       |
| 8   | ICU Pharmacist                                                                                                   |                                                                                                           |                                                                                                                                                                                                                                                                                                                                                                                                                                                                                                                                                                                                                                                                                                                                                                                                                                         |   |                                         |   |                        |   |                            |   |                |   |                           |   |                                  |   |                                |   |                |   |                           |    |                        |    |                            |    |                          |    |                                                |    |       |
| 9   | ICU Respiratory Therapist                                                                                        |                                                                                                           |                                                                                                                                                                                                                                                                                                                                                                                                                                                                                                                                                                                                                                                                                                                                                                                                                                         |   |                                         |   |                        |   |                            |   |                |   |                           |   |                                  |   |                                |   |                |   |                           |    |                        |    |                            |    |                          |    |                                                |    |       |
| 10  | ICU Physical Therapist                                                                                           |                                                                                                           |                                                                                                                                                                                                                                                                                                                                                                                                                                                                                                                                                                                                                                                                                                                                                                                                                                         |   |                                         |   |                        |   |                            |   |                |   |                           |   |                                  |   |                                |   |                |   |                           |    |                        |    |                            |    |                          |    |                                                |    |       |
| 11  | ICU Occupational Therapist                                                                                       |                                                                                                           |                                                                                                                                                                                                                                                                                                                                                                                                                                                                                                                                                                                                                                                                                                                                                                                                                                         |   |                                         |   |                        |   |                            |   |                |   |                           |   |                                  |   |                                |   |                |   |                           |    |                        |    |                            |    |                          |    |                                                |    |       |
| 12  | Informational Technology                                                                                         |                                                                                                           |                                                                                                                                                                                                                                                                                                                                                                                                                                                                                                                                                                                                                                                                                                                                                                                                                                         |   |                                         |   |                        |   |                            |   |                |   |                           |   |                                  |   |                                |   |                |   |                           |    |                        |    |                            |    |                          |    |                                                |    |       |
| 13  | Patient Safety/Quality Improvement Specialists                                                                   |                                                                                                           |                                                                                                                                                                                                                                                                                                                                                                                                                                                                                                                                                                                                                                                                                                                                                                                                                                         |   |                                         |   |                        |   |                            |   |                |   |                           |   |                                  |   |                                |   |                |   |                           |    |                        |    |                            |    |                          |    |                                                |    |       |
| 14  | Other                                                                                                            |                                                                                                           |                                                                                                                                                                                                                                                                                                                                                                                                                                                                                                                                                                                                                                                                                                                                                                                                                                         |   |                                         |   |                        |   |                            |   |                |   |                           |   |                                  |   |                                |   |                |   |                           |    |                        |    |                            |    |                          |    |                                                |    |       |
| 488 | section_11_person_2_work<br>Show the field ONLY if:<br>[section_11_team_num] > 1                                 | Did team member two work in participating ICU during the course of the SCCM ICU Liberation Collaborative? | yesno, Required<br><table border="1"> <tr><td>1</td><td>Yes</td></tr> <tr><td>0</td><td>No</td></tr> </table><br>Custom alignment: RH                                                                                                                                                                                                                                                                                                                                                                                                                                                                                                                                                                                                                                                                                                   | 1 | Yes                                     | 0 | No                     |   |                            |   |                |   |                           |   |                                  |   |                                |   |                |   |                           |    |                        |    |                            |    |                          |    |                                                |    |       |
| 1   | Yes                                                                                                              |                                                                                                           |                                                                                                                                                                                                                                                                                                                                                                                                                                                                                                                                                                                                                                                                                                                                                                                                                                         |   |                                         |   |                        |   |                            |   |                |   |                           |   |                                  |   |                                |   |                |   |                           |    |                        |    |                            |    |                          |    |                                                |    |       |
| 0   | No                                                                                                               |                                                                                                           |                                                                                                                                                                                                                                                                                                                                                                                                                                                                                                                                                                                                                                                                                                                                                                                                                                         |   |                                         |   |                        |   |                            |   |                |   |                           |   |                                  |   |                                |   |                |   |                           |    |                        |    |                            |    |                          |    |                                                |    |       |
| 489 | section_11_person_2_exp<br>Show the field ONLY if:<br>[section_11_team_num] > 1                                  | Team member two current years of professional experience                                                  | text (number, Min: 1, Max: 99), Required<br>Custom alignment: RH                                                                                                                                                                                                                                                                                                                                                                                                                                                                                                                                                                                                                                                                                                                                                                        |   |                                         |   |                        |   |                            |   |                |   |                           |   |                                  |   |                                |   |                |   |                           |    |                        |    |                            |    |                          |    |                                                |    |       |

|     |                                                                                                                          |                                                                                                                                    |                                                                                                                                                                                                                                                                                                                                                                                                                                                                                                                                                                                                                                                                                                                                                                                                                                                                                                                                                                                                                                                           |
|-----|--------------------------------------------------------------------------------------------------------------------------|------------------------------------------------------------------------------------------------------------------------------------|-----------------------------------------------------------------------------------------------------------------------------------------------------------------------------------------------------------------------------------------------------------------------------------------------------------------------------------------------------------------------------------------------------------------------------------------------------------------------------------------------------------------------------------------------------------------------------------------------------------------------------------------------------------------------------------------------------------------------------------------------------------------------------------------------------------------------------------------------------------------------------------------------------------------------------------------------------------------------------------------------------------------------------------------------------------|
| 490 | section_11_person_2_responsibilities<br>Show the field ONLY if:<br>[section_11_team_num] > 1                             | What responsibilities did team member two hold during the course of the SCCM ICU Liberation collaborative? (select all that apply) | checkbox, Required<br>1 section_11_person_2_responsibilities__1 Core ICU Liberation team leader (Regional Champion)<br>2 section_11_person_2_responsibilities__2 Core ICU Liberation team leader (attended a minimum of 1 person ICU Liberation Collaborative meeting)<br>3 section_11_person_2_responsibilities__3 Core ICU Liberation team leader (attend any in-ICU Liberation Collaborative meetings)<br>4 section_11_person_2_responsibilities__4 Participating in ABCDEF bundle champion<br>5 section_11_person_2_responsibilities__5 Responsible for training/education of other ICU clinicians on ABCDEF bundle at participating sites<br>6 section_11_person_2_responsibilities__6 Responsible for Liberation Collaborative collection efforts<br>7 section_11_person_2_responsibilities__7 Revising participating in ABCDEF bundle related policies<br>8 section_11_person_2_responsibilities__8 Communicating with hospital administrator regarding ABC bundle implementation efforts/needs<br>9 section_11_person_2_responsibilities__9 Other |
| 491 | section_11_person_2_other_responsibilities<br>Show the field ONLY if:<br>[section_11_person_2_responsibilities(9)] = '1' | Please specify other responsibilities:                                                                                             | text, Required                                                                                                                                                                                                                                                                                                                                                                                                                                                                                                                                                                                                                                                                                                                                                                                                                                                                                                                                                                                                                                            |
| 492 | section_11_person_3_name<br>Show the field ONLY if:<br>[section_11_team_num] > 2                                         | Name of team member three                                                                                                          | text, Required<br>Custom alignment: RH                                                                                                                                                                                                                                                                                                                                                                                                                                                                                                                                                                                                                                                                                                                                                                                                                                                                                                                                                                                                                    |
| 493 | section_11_person_3_email<br>Show the field ONLY if:<br>[section_11_team_num] > 2                                        | E-mail of team member three                                                                                                        | text (email), Required<br>Custom alignment: RH                                                                                                                                                                                                                                                                                                                                                                                                                                                                                                                                                                                                                                                                                                                                                                                                                                                                                                                                                                                                            |

|     |                                                                                        |                                                                                                             |                                                                                                                                                                                                                                                                                                                                                                                                                                                                                                                                                                                                                                                                                                                                                                                                                                         |   |                                         |   |                        |   |                            |   |                |   |                           |   |                                  |   |                                |   |                |   |                           |    |                        |    |                            |    |                          |    |                                                |    |       |
|-----|----------------------------------------------------------------------------------------|-------------------------------------------------------------------------------------------------------------|-----------------------------------------------------------------------------------------------------------------------------------------------------------------------------------------------------------------------------------------------------------------------------------------------------------------------------------------------------------------------------------------------------------------------------------------------------------------------------------------------------------------------------------------------------------------------------------------------------------------------------------------------------------------------------------------------------------------------------------------------------------------------------------------------------------------------------------------|---|-----------------------------------------|---|------------------------|---|----------------------------|---|----------------|---|---------------------------|---|----------------------------------|---|--------------------------------|---|----------------|---|---------------------------|----|------------------------|----|----------------------------|----|--------------------------|----|------------------------------------------------|----|-------|
| 494 | section_11_person_3_profession<br>Show the field ONLY if:<br>[section_11_team_num] > 2 | Profession of team member three                                                                             | radio, Required<br><table border="1"> <tr><td>1</td><td>ICU Registered Nurse (bedside provider)</td></tr> <tr><td>2</td><td>ICU Nurse Practitioner</td></tr> <tr><td>3</td><td>ICU Nurse Manager/Director</td></tr> <tr><td>4</td><td>Nurse Educator</td></tr> <tr><td>5</td><td>Clinical Nurse Specialist</td></tr> <tr><td>6</td><td>ICU Physician (bedside provider)</td></tr> <tr><td>7</td><td>ICU Physician Director/Manager</td></tr> <tr><td>8</td><td>ICU Pharmacist</td></tr> <tr><td>9</td><td>ICU Respiratory Therapist</td></tr> <tr><td>10</td><td>ICU Physical Therapist</td></tr> <tr><td>11</td><td>ICU Occupational Therapist</td></tr> <tr><td>12</td><td>Informational Technology</td></tr> <tr><td>13</td><td>Patient Safety/Quality Improvement Specialists</td></tr> <tr><td>14</td><td>Other</td></tr> </table> | 1 | ICU Registered Nurse (bedside provider) | 2 | ICU Nurse Practitioner | 3 | ICU Nurse Manager/Director | 4 | Nurse Educator | 5 | Clinical Nurse Specialist | 6 | ICU Physician (bedside provider) | 7 | ICU Physician Director/Manager | 8 | ICU Pharmacist | 9 | ICU Respiratory Therapist | 10 | ICU Physical Therapist | 11 | ICU Occupational Therapist | 12 | Informational Technology | 13 | Patient Safety/Quality Improvement Specialists | 14 | Other |
| 1   | ICU Registered Nurse (bedside provider)                                                |                                                                                                             |                                                                                                                                                                                                                                                                                                                                                                                                                                                                                                                                                                                                                                                                                                                                                                                                                                         |   |                                         |   |                        |   |                            |   |                |   |                           |   |                                  |   |                                |   |                |   |                           |    |                        |    |                            |    |                          |    |                                                |    |       |
| 2   | ICU Nurse Practitioner                                                                 |                                                                                                             |                                                                                                                                                                                                                                                                                                                                                                                                                                                                                                                                                                                                                                                                                                                                                                                                                                         |   |                                         |   |                        |   |                            |   |                |   |                           |   |                                  |   |                                |   |                |   |                           |    |                        |    |                            |    |                          |    |                                                |    |       |
| 3   | ICU Nurse Manager/Director                                                             |                                                                                                             |                                                                                                                                                                                                                                                                                                                                                                                                                                                                                                                                                                                                                                                                                                                                                                                                                                         |   |                                         |   |                        |   |                            |   |                |   |                           |   |                                  |   |                                |   |                |   |                           |    |                        |    |                            |    |                          |    |                                                |    |       |
| 4   | Nurse Educator                                                                         |                                                                                                             |                                                                                                                                                                                                                                                                                                                                                                                                                                                                                                                                                                                                                                                                                                                                                                                                                                         |   |                                         |   |                        |   |                            |   |                |   |                           |   |                                  |   |                                |   |                |   |                           |    |                        |    |                            |    |                          |    |                                                |    |       |
| 5   | Clinical Nurse Specialist                                                              |                                                                                                             |                                                                                                                                                                                                                                                                                                                                                                                                                                                                                                                                                                                                                                                                                                                                                                                                                                         |   |                                         |   |                        |   |                            |   |                |   |                           |   |                                  |   |                                |   |                |   |                           |    |                        |    |                            |    |                          |    |                                                |    |       |
| 6   | ICU Physician (bedside provider)                                                       |                                                                                                             |                                                                                                                                                                                                                                                                                                                                                                                                                                                                                                                                                                                                                                                                                                                                                                                                                                         |   |                                         |   |                        |   |                            |   |                |   |                           |   |                                  |   |                                |   |                |   |                           |    |                        |    |                            |    |                          |    |                                                |    |       |
| 7   | ICU Physician Director/Manager                                                         |                                                                                                             |                                                                                                                                                                                                                                                                                                                                                                                                                                                                                                                                                                                                                                                                                                                                                                                                                                         |   |                                         |   |                        |   |                            |   |                |   |                           |   |                                  |   |                                |   |                |   |                           |    |                        |    |                            |    |                          |    |                                                |    |       |
| 8   | ICU Pharmacist                                                                         |                                                                                                             |                                                                                                                                                                                                                                                                                                                                                                                                                                                                                                                                                                                                                                                                                                                                                                                                                                         |   |                                         |   |                        |   |                            |   |                |   |                           |   |                                  |   |                                |   |                |   |                           |    |                        |    |                            |    |                          |    |                                                |    |       |
| 9   | ICU Respiratory Therapist                                                              |                                                                                                             |                                                                                                                                                                                                                                                                                                                                                                                                                                                                                                                                                                                                                                                                                                                                                                                                                                         |   |                                         |   |                        |   |                            |   |                |   |                           |   |                                  |   |                                |   |                |   |                           |    |                        |    |                            |    |                          |    |                                                |    |       |
| 10  | ICU Physical Therapist                                                                 |                                                                                                             |                                                                                                                                                                                                                                                                                                                                                                                                                                                                                                                                                                                                                                                                                                                                                                                                                                         |   |                                         |   |                        |   |                            |   |                |   |                           |   |                                  |   |                                |   |                |   |                           |    |                        |    |                            |    |                          |    |                                                |    |       |
| 11  | ICU Occupational Therapist                                                             |                                                                                                             |                                                                                                                                                                                                                                                                                                                                                                                                                                                                                                                                                                                                                                                                                                                                                                                                                                         |   |                                         |   |                        |   |                            |   |                |   |                           |   |                                  |   |                                |   |                |   |                           |    |                        |    |                            |    |                          |    |                                                |    |       |
| 12  | Informational Technology                                                               |                                                                                                             |                                                                                                                                                                                                                                                                                                                                                                                                                                                                                                                                                                                                                                                                                                                                                                                                                                         |   |                                         |   |                        |   |                            |   |                |   |                           |   |                                  |   |                                |   |                |   |                           |    |                        |    |                            |    |                          |    |                                                |    |       |
| 13  | Patient Safety/Quality Improvement Specialists                                         |                                                                                                             |                                                                                                                                                                                                                                                                                                                                                                                                                                                                                                                                                                                                                                                                                                                                                                                                                                         |   |                                         |   |                        |   |                            |   |                |   |                           |   |                                  |   |                                |   |                |   |                           |    |                        |    |                            |    |                          |    |                                                |    |       |
| 14  | Other                                                                                  |                                                                                                             |                                                                                                                                                                                                                                                                                                                                                                                                                                                                                                                                                                                                                                                                                                                                                                                                                                         |   |                                         |   |                        |   |                            |   |                |   |                           |   |                                  |   |                                |   |                |   |                           |    |                        |    |                            |    |                          |    |                                                |    |       |
| 495 | section_11_person_3_work<br>Show the field ONLY if:<br>[section_11_team_num] > 2       | Did team member three work in participating ICU during the course of the SCCM ICU Liberation Collaborative? | yesno, Required<br><table border="1"> <tr><td>1</td><td>Yes</td></tr> <tr><td>0</td><td>No</td></tr> </table> Custom alignment: RH                                                                                                                                                                                                                                                                                                                                                                                                                                                                                                                                                                                                                                                                                                      | 1 | Yes                                     | 0 | No                     |   |                            |   |                |   |                           |   |                                  |   |                                |   |                |   |                           |    |                        |    |                            |    |                          |    |                                                |    |       |
| 1   | Yes                                                                                    |                                                                                                             |                                                                                                                                                                                                                                                                                                                                                                                                                                                                                                                                                                                                                                                                                                                                                                                                                                         |   |                                         |   |                        |   |                            |   |                |   |                           |   |                                  |   |                                |   |                |   |                           |    |                        |    |                            |    |                          |    |                                                |    |       |
| 0   | No                                                                                     |                                                                                                             |                                                                                                                                                                                                                                                                                                                                                                                                                                                                                                                                                                                                                                                                                                                                                                                                                                         |   |                                         |   |                        |   |                            |   |                |   |                           |   |                                  |   |                                |   |                |   |                           |    |                        |    |                            |    |                          |    |                                                |    |       |
| 496 | section_11_person_3_exp<br>Show the field ONLY if:<br>[section_11_team_num] > 2        | Team member three current years of professional experience                                                  | text (number, Min: 1, Max: 99), Required<br>Custom alignment: RH                                                                                                                                                                                                                                                                                                                                                                                                                                                                                                                                                                                                                                                                                                                                                                        |   |                                         |   |                        |   |                            |   |                |   |                           |   |                                  |   |                                |   |                |   |                           |    |                        |    |                            |    |                          |    |                                                |    |       |

|            |                                                                                                                                      |                                                                                                                                             |                                                                                                                                                                                                                                                                                                                                                                                                                                                                                                                                                                                                                                                                                                                                                                                                                                                                                                                                                                                                                                                                                                                                                                                                                                                                                                                                                                                                                                                                                                                                                                                                                                                                                                                                                                                                                                                                                                                                                                                                                                                                                                                                                                                                          |   |                                         |                                         |   |                                         |                                                                                                 |   |                                         |                                                                                 |   |                                         |                                      |   |                                         |                                                                         |   |                                         |                                                        |   |                                         |                                                      |   |                                         |                                                                                    |   |                                         |       |
|------------|--------------------------------------------------------------------------------------------------------------------------------------|---------------------------------------------------------------------------------------------------------------------------------------------|----------------------------------------------------------------------------------------------------------------------------------------------------------------------------------------------------------------------------------------------------------------------------------------------------------------------------------------------------------------------------------------------------------------------------------------------------------------------------------------------------------------------------------------------------------------------------------------------------------------------------------------------------------------------------------------------------------------------------------------------------------------------------------------------------------------------------------------------------------------------------------------------------------------------------------------------------------------------------------------------------------------------------------------------------------------------------------------------------------------------------------------------------------------------------------------------------------------------------------------------------------------------------------------------------------------------------------------------------------------------------------------------------------------------------------------------------------------------------------------------------------------------------------------------------------------------------------------------------------------------------------------------------------------------------------------------------------------------------------------------------------------------------------------------------------------------------------------------------------------------------------------------------------------------------------------------------------------------------------------------------------------------------------------------------------------------------------------------------------------------------------------------------------------------------------------------------------|---|-----------------------------------------|-----------------------------------------|---|-----------------------------------------|-------------------------------------------------------------------------------------------------|---|-----------------------------------------|---------------------------------------------------------------------------------|---|-----------------------------------------|--------------------------------------|---|-----------------------------------------|-------------------------------------------------------------------------|---|-----------------------------------------|--------------------------------------------------------|---|-----------------------------------------|------------------------------------------------------|---|-----------------------------------------|------------------------------------------------------------------------------------|---|-----------------------------------------|-------|
| <p>497</p> | <p>section_11_person_3_responsibilities</p> <p>Show the field ONLY if:<br/>[section_11_team_num] &gt; 2</p>                          | <p>What responsibilities did team member three hold during the course of the SCCM ICU Liberation collaborative? (select all that apply)</p> | <p>checkbox, Required</p> <table border="1"> <tr> <td data-bbox="1036 107 1068 191">1</td> <td data-bbox="1068 107 1430 191">section_11_person_3_responsibilities__1</td> <td data-bbox="1430 107 1570 191">Core ICU Libe team leader (Regional Cha</td> </tr> <tr> <td data-bbox="1036 191 1068 401">2</td> <td data-bbox="1068 191 1430 401">section_11_person_3_responsibilities__2</td> <td data-bbox="1430 191 1570 401">Core ICU Libe team leader (attended a minimum of 1 person ICU Liberation Collaborative meeting)</td> </tr> <tr> <td data-bbox="1036 401 1068 562">3</td> <td data-bbox="1068 401 1430 562">section_11_person_3_responsibilities__3</td> <td data-bbox="1430 401 1570 562">Core ICU Libe team leader (attend any in-ICU Liberation Collaborative meetings)</td> </tr> <tr> <td data-bbox="1036 562 1068 653">4</td> <td data-bbox="1068 562 1430 653">section_11_person_3_responsibilities__4</td> <td data-bbox="1430 562 1570 653">Participating : ABCDEF bund champion</td> </tr> <tr> <td data-bbox="1036 653 1068 789">5</td> <td data-bbox="1068 653 1430 789">section_11_person_3_responsibilities__5</td> <td data-bbox="1430 653 1570 789">Responsible f training/educ other ICU clin on ABCDEF bu at participatir</td> </tr> <tr> <td data-bbox="1036 789 1068 900">6</td> <td data-bbox="1068 789 1430 900">section_11_person_3_responsibilities__6</td> <td data-bbox="1430 789 1570 900">Responsible f Liberation Collaborative collection effc</td> </tr> <tr> <td data-bbox="1036 900 1068 1012">7</td> <td data-bbox="1068 900 1430 1012">section_11_person_3_responsibilities__7</td> <td data-bbox="1430 900 1570 1012">Revising participating : ABCDEF bund related policie</td> </tr> <tr> <td data-bbox="1036 1012 1068 1199">8</td> <td data-bbox="1068 1012 1430 1199">section_11_person_3_responsibilities__8</td> <td data-bbox="1430 1012 1570 1199">Communicati hospital administrator regarding ABC bundle implementati efforts/needs</td> </tr> <tr> <td data-bbox="1036 1199 1068 1241">9</td> <td data-bbox="1068 1199 1430 1241">section_11_person_3_responsibilities__9</td> <td data-bbox="1430 1199 1570 1241">Other</td> </tr> </table> | 1 | section_11_person_3_responsibilities__1 | Core ICU Libe team leader (Regional Cha | 2 | section_11_person_3_responsibilities__2 | Core ICU Libe team leader (attended a minimum of 1 person ICU Liberation Collaborative meeting) | 3 | section_11_person_3_responsibilities__3 | Core ICU Libe team leader (attend any in-ICU Liberation Collaborative meetings) | 4 | section_11_person_3_responsibilities__4 | Participating : ABCDEF bund champion | 5 | section_11_person_3_responsibilities__5 | Responsible f training/educ other ICU clin on ABCDEF bu at participatir | 6 | section_11_person_3_responsibilities__6 | Responsible f Liberation Collaborative collection effc | 7 | section_11_person_3_responsibilities__7 | Revising participating : ABCDEF bund related policie | 8 | section_11_person_3_responsibilities__8 | Communicati hospital administrator regarding ABC bundle implementati efforts/needs | 9 | section_11_person_3_responsibilities__9 | Other |
| 1          | section_11_person_3_responsibilities__1                                                                                              | Core ICU Libe team leader (Regional Cha                                                                                                     |                                                                                                                                                                                                                                                                                                                                                                                                                                                                                                                                                                                                                                                                                                                                                                                                                                                                                                                                                                                                                                                                                                                                                                                                                                                                                                                                                                                                                                                                                                                                                                                                                                                                                                                                                                                                                                                                                                                                                                                                                                                                                                                                                                                                          |   |                                         |                                         |   |                                         |                                                                                                 |   |                                         |                                                                                 |   |                                         |                                      |   |                                         |                                                                         |   |                                         |                                                        |   |                                         |                                                      |   |                                         |                                                                                    |   |                                         |       |
| 2          | section_11_person_3_responsibilities__2                                                                                              | Core ICU Libe team leader (attended a minimum of 1 person ICU Liberation Collaborative meeting)                                             |                                                                                                                                                                                                                                                                                                                                                                                                                                                                                                                                                                                                                                                                                                                                                                                                                                                                                                                                                                                                                                                                                                                                                                                                                                                                                                                                                                                                                                                                                                                                                                                                                                                                                                                                                                                                                                                                                                                                                                                                                                                                                                                                                                                                          |   |                                         |                                         |   |                                         |                                                                                                 |   |                                         |                                                                                 |   |                                         |                                      |   |                                         |                                                                         |   |                                         |                                                        |   |                                         |                                                      |   |                                         |                                                                                    |   |                                         |       |
| 3          | section_11_person_3_responsibilities__3                                                                                              | Core ICU Libe team leader (attend any in-ICU Liberation Collaborative meetings)                                                             |                                                                                                                                                                                                                                                                                                                                                                                                                                                                                                                                                                                                                                                                                                                                                                                                                                                                                                                                                                                                                                                                                                                                                                                                                                                                                                                                                                                                                                                                                                                                                                                                                                                                                                                                                                                                                                                                                                                                                                                                                                                                                                                                                                                                          |   |                                         |                                         |   |                                         |                                                                                                 |   |                                         |                                                                                 |   |                                         |                                      |   |                                         |                                                                         |   |                                         |                                                        |   |                                         |                                                      |   |                                         |                                                                                    |   |                                         |       |
| 4          | section_11_person_3_responsibilities__4                                                                                              | Participating : ABCDEF bund champion                                                                                                        |                                                                                                                                                                                                                                                                                                                                                                                                                                                                                                                                                                                                                                                                                                                                                                                                                                                                                                                                                                                                                                                                                                                                                                                                                                                                                                                                                                                                                                                                                                                                                                                                                                                                                                                                                                                                                                                                                                                                                                                                                                                                                                                                                                                                          |   |                                         |                                         |   |                                         |                                                                                                 |   |                                         |                                                                                 |   |                                         |                                      |   |                                         |                                                                         |   |                                         |                                                        |   |                                         |                                                      |   |                                         |                                                                                    |   |                                         |       |
| 5          | section_11_person_3_responsibilities__5                                                                                              | Responsible f training/educ other ICU clin on ABCDEF bu at participatir                                                                     |                                                                                                                                                                                                                                                                                                                                                                                                                                                                                                                                                                                                                                                                                                                                                                                                                                                                                                                                                                                                                                                                                                                                                                                                                                                                                                                                                                                                                                                                                                                                                                                                                                                                                                                                                                                                                                                                                                                                                                                                                                                                                                                                                                                                          |   |                                         |                                         |   |                                         |                                                                                                 |   |                                         |                                                                                 |   |                                         |                                      |   |                                         |                                                                         |   |                                         |                                                        |   |                                         |                                                      |   |                                         |                                                                                    |   |                                         |       |
| 6          | section_11_person_3_responsibilities__6                                                                                              | Responsible f Liberation Collaborative collection effc                                                                                      |                                                                                                                                                                                                                                                                                                                                                                                                                                                                                                                                                                                                                                                                                                                                                                                                                                                                                                                                                                                                                                                                                                                                                                                                                                                                                                                                                                                                                                                                                                                                                                                                                                                                                                                                                                                                                                                                                                                                                                                                                                                                                                                                                                                                          |   |                                         |                                         |   |                                         |                                                                                                 |   |                                         |                                                                                 |   |                                         |                                      |   |                                         |                                                                         |   |                                         |                                                        |   |                                         |                                                      |   |                                         |                                                                                    |   |                                         |       |
| 7          | section_11_person_3_responsibilities__7                                                                                              | Revising participating : ABCDEF bund related policie                                                                                        |                                                                                                                                                                                                                                                                                                                                                                                                                                                                                                                                                                                                                                                                                                                                                                                                                                                                                                                                                                                                                                                                                                                                                                                                                                                                                                                                                                                                                                                                                                                                                                                                                                                                                                                                                                                                                                                                                                                                                                                                                                                                                                                                                                                                          |   |                                         |                                         |   |                                         |                                                                                                 |   |                                         |                                                                                 |   |                                         |                                      |   |                                         |                                                                         |   |                                         |                                                        |   |                                         |                                                      |   |                                         |                                                                                    |   |                                         |       |
| 8          | section_11_person_3_responsibilities__8                                                                                              | Communicati hospital administrator regarding ABC bundle implementati efforts/needs                                                          |                                                                                                                                                                                                                                                                                                                                                                                                                                                                                                                                                                                                                                                                                                                                                                                                                                                                                                                                                                                                                                                                                                                                                                                                                                                                                                                                                                                                                                                                                                                                                                                                                                                                                                                                                                                                                                                                                                                                                                                                                                                                                                                                                                                                          |   |                                         |                                         |   |                                         |                                                                                                 |   |                                         |                                                                                 |   |                                         |                                      |   |                                         |                                                                         |   |                                         |                                                        |   |                                         |                                                      |   |                                         |                                                                                    |   |                                         |       |
| 9          | section_11_person_3_responsibilities__9                                                                                              | Other                                                                                                                                       |                                                                                                                                                                                                                                                                                                                                                                                                                                                                                                                                                                                                                                                                                                                                                                                                                                                                                                                                                                                                                                                                                                                                                                                                                                                                                                                                                                                                                                                                                                                                                                                                                                                                                                                                                                                                                                                                                                                                                                                                                                                                                                                                                                                                          |   |                                         |                                         |   |                                         |                                                                                                 |   |                                         |                                                                                 |   |                                         |                                      |   |                                         |                                                                         |   |                                         |                                                        |   |                                         |                                                      |   |                                         |                                                                                    |   |                                         |       |
| <p>498</p> | <p>section_11_person_3_other_responsibilities</p> <p>Show the field ONLY if:<br/>[section_11_person_3_responsibilities(9)] = '1'</p> | <p>Please specify other responsibilities:</p>                                                                                               | <p>text, Required</p>                                                                                                                                                                                                                                                                                                                                                                                                                                                                                                                                                                                                                                                                                                                                                                                                                                                                                                                                                                                                                                                                                                                                                                                                                                                                                                                                                                                                                                                                                                                                                                                                                                                                                                                                                                                                                                                                                                                                                                                                                                                                                                                                                                                    |   |                                         |                                         |   |                                         |                                                                                                 |   |                                         |                                                                                 |   |                                         |                                      |   |                                         |                                                                         |   |                                         |                                                        |   |                                         |                                                      |   |                                         |                                                                                    |   |                                         |       |
| <p>499</p> | <p>section_11_person_4_name</p> <p>Show the field ONLY if:<br/>[section_11_team_num] &gt; 3</p>                                      | <p>Name of team member four</p>                                                                                                             | <p>text, Required<br/>Custom alignment: RH</p>                                                                                                                                                                                                                                                                                                                                                                                                                                                                                                                                                                                                                                                                                                                                                                                                                                                                                                                                                                                                                                                                                                                                                                                                                                                                                                                                                                                                                                                                                                                                                                                                                                                                                                                                                                                                                                                                                                                                                                                                                                                                                                                                                           |   |                                         |                                         |   |                                         |                                                                                                 |   |                                         |                                                                                 |   |                                         |                                      |   |                                         |                                                                         |   |                                         |                                                        |   |                                         |                                                      |   |                                         |                                                                                    |   |                                         |       |
| <p>500</p> | <p>section_11_person_4_email</p> <p>Show the field ONLY if:<br/>[section_11_team_num] &gt; 3</p>                                     | <p>E-mail of team member four</p>                                                                                                           | <p>text (email), Required<br/>Custom alignment: RH</p>                                                                                                                                                                                                                                                                                                                                                                                                                                                                                                                                                                                                                                                                                                                                                                                                                                                                                                                                                                                                                                                                                                                                                                                                                                                                                                                                                                                                                                                                                                                                                                                                                                                                                                                                                                                                                                                                                                                                                                                                                                                                                                                                                   |   |                                         |                                         |   |                                         |                                                                                                 |   |                                         |                                                                                 |   |                                         |                                      |   |                                         |                                                                         |   |                                         |                                                        |   |                                         |                                                      |   |                                         |                                                                                    |   |                                         |       |

|     |                                                                                        |                                                                                                            |                                                                                                                                                                                                                                                                                                                                                                                                                                                                                                                                                                                                                                                                                                                                                                                                                                         |   |                                         |   |                        |   |                            |   |                |   |                           |   |                                  |   |                                |   |                |   |                           |    |                        |    |                            |    |                          |    |                                                |    |       |
|-----|----------------------------------------------------------------------------------------|------------------------------------------------------------------------------------------------------------|-----------------------------------------------------------------------------------------------------------------------------------------------------------------------------------------------------------------------------------------------------------------------------------------------------------------------------------------------------------------------------------------------------------------------------------------------------------------------------------------------------------------------------------------------------------------------------------------------------------------------------------------------------------------------------------------------------------------------------------------------------------------------------------------------------------------------------------------|---|-----------------------------------------|---|------------------------|---|----------------------------|---|----------------|---|---------------------------|---|----------------------------------|---|--------------------------------|---|----------------|---|---------------------------|----|------------------------|----|----------------------------|----|--------------------------|----|------------------------------------------------|----|-------|
| 501 | section_11_person_4_profession<br>Show the field ONLY if:<br>[section_11_team_num] > 3 | Profession of team member four                                                                             | radio, Required<br><table border="1"> <tr><td>1</td><td>ICU Registered Nurse (bedside provider)</td></tr> <tr><td>2</td><td>ICU Nurse Practitioner</td></tr> <tr><td>3</td><td>ICU Nurse Manager/Director</td></tr> <tr><td>4</td><td>Nurse Educator</td></tr> <tr><td>5</td><td>Clinical Nurse Specialist</td></tr> <tr><td>6</td><td>ICU Physician (bedside provider)</td></tr> <tr><td>7</td><td>ICU Physician Director/Manager</td></tr> <tr><td>8</td><td>ICU Pharmacist</td></tr> <tr><td>9</td><td>ICU Respiratory Therapist</td></tr> <tr><td>10</td><td>ICU Physical Therapist</td></tr> <tr><td>11</td><td>ICU Occupational Therapist</td></tr> <tr><td>12</td><td>Informational Technology</td></tr> <tr><td>13</td><td>Patient Safety/Quality Improvement Specialists</td></tr> <tr><td>14</td><td>Other</td></tr> </table> | 1 | ICU Registered Nurse (bedside provider) | 2 | ICU Nurse Practitioner | 3 | ICU Nurse Manager/Director | 4 | Nurse Educator | 5 | Clinical Nurse Specialist | 6 | ICU Physician (bedside provider) | 7 | ICU Physician Director/Manager | 8 | ICU Pharmacist | 9 | ICU Respiratory Therapist | 10 | ICU Physical Therapist | 11 | ICU Occupational Therapist | 12 | Informational Technology | 13 | Patient Safety/Quality Improvement Specialists | 14 | Other |
| 1   | ICU Registered Nurse (bedside provider)                                                |                                                                                                            |                                                                                                                                                                                                                                                                                                                                                                                                                                                                                                                                                                                                                                                                                                                                                                                                                                         |   |                                         |   |                        |   |                            |   |                |   |                           |   |                                  |   |                                |   |                |   |                           |    |                        |    |                            |    |                          |    |                                                |    |       |
| 2   | ICU Nurse Practitioner                                                                 |                                                                                                            |                                                                                                                                                                                                                                                                                                                                                                                                                                                                                                                                                                                                                                                                                                                                                                                                                                         |   |                                         |   |                        |   |                            |   |                |   |                           |   |                                  |   |                                |   |                |   |                           |    |                        |    |                            |    |                          |    |                                                |    |       |
| 3   | ICU Nurse Manager/Director                                                             |                                                                                                            |                                                                                                                                                                                                                                                                                                                                                                                                                                                                                                                                                                                                                                                                                                                                                                                                                                         |   |                                         |   |                        |   |                            |   |                |   |                           |   |                                  |   |                                |   |                |   |                           |    |                        |    |                            |    |                          |    |                                                |    |       |
| 4   | Nurse Educator                                                                         |                                                                                                            |                                                                                                                                                                                                                                                                                                                                                                                                                                                                                                                                                                                                                                                                                                                                                                                                                                         |   |                                         |   |                        |   |                            |   |                |   |                           |   |                                  |   |                                |   |                |   |                           |    |                        |    |                            |    |                          |    |                                                |    |       |
| 5   | Clinical Nurse Specialist                                                              |                                                                                                            |                                                                                                                                                                                                                                                                                                                                                                                                                                                                                                                                                                                                                                                                                                                                                                                                                                         |   |                                         |   |                        |   |                            |   |                |   |                           |   |                                  |   |                                |   |                |   |                           |    |                        |    |                            |    |                          |    |                                                |    |       |
| 6   | ICU Physician (bedside provider)                                                       |                                                                                                            |                                                                                                                                                                                                                                                                                                                                                                                                                                                                                                                                                                                                                                                                                                                                                                                                                                         |   |                                         |   |                        |   |                            |   |                |   |                           |   |                                  |   |                                |   |                |   |                           |    |                        |    |                            |    |                          |    |                                                |    |       |
| 7   | ICU Physician Director/Manager                                                         |                                                                                                            |                                                                                                                                                                                                                                                                                                                                                                                                                                                                                                                                                                                                                                                                                                                                                                                                                                         |   |                                         |   |                        |   |                            |   |                |   |                           |   |                                  |   |                                |   |                |   |                           |    |                        |    |                            |    |                          |    |                                                |    |       |
| 8   | ICU Pharmacist                                                                         |                                                                                                            |                                                                                                                                                                                                                                                                                                                                                                                                                                                                                                                                                                                                                                                                                                                                                                                                                                         |   |                                         |   |                        |   |                            |   |                |   |                           |   |                                  |   |                                |   |                |   |                           |    |                        |    |                            |    |                          |    |                                                |    |       |
| 9   | ICU Respiratory Therapist                                                              |                                                                                                            |                                                                                                                                                                                                                                                                                                                                                                                                                                                                                                                                                                                                                                                                                                                                                                                                                                         |   |                                         |   |                        |   |                            |   |                |   |                           |   |                                  |   |                                |   |                |   |                           |    |                        |    |                            |    |                          |    |                                                |    |       |
| 10  | ICU Physical Therapist                                                                 |                                                                                                            |                                                                                                                                                                                                                                                                                                                                                                                                                                                                                                                                                                                                                                                                                                                                                                                                                                         |   |                                         |   |                        |   |                            |   |                |   |                           |   |                                  |   |                                |   |                |   |                           |    |                        |    |                            |    |                          |    |                                                |    |       |
| 11  | ICU Occupational Therapist                                                             |                                                                                                            |                                                                                                                                                                                                                                                                                                                                                                                                                                                                                                                                                                                                                                                                                                                                                                                                                                         |   |                                         |   |                        |   |                            |   |                |   |                           |   |                                  |   |                                |   |                |   |                           |    |                        |    |                            |    |                          |    |                                                |    |       |
| 12  | Informational Technology                                                               |                                                                                                            |                                                                                                                                                                                                                                                                                                                                                                                                                                                                                                                                                                                                                                                                                                                                                                                                                                         |   |                                         |   |                        |   |                            |   |                |   |                           |   |                                  |   |                                |   |                |   |                           |    |                        |    |                            |    |                          |    |                                                |    |       |
| 13  | Patient Safety/Quality Improvement Specialists                                         |                                                                                                            |                                                                                                                                                                                                                                                                                                                                                                                                                                                                                                                                                                                                                                                                                                                                                                                                                                         |   |                                         |   |                        |   |                            |   |                |   |                           |   |                                  |   |                                |   |                |   |                           |    |                        |    |                            |    |                          |    |                                                |    |       |
| 14  | Other                                                                                  |                                                                                                            |                                                                                                                                                                                                                                                                                                                                                                                                                                                                                                                                                                                                                                                                                                                                                                                                                                         |   |                                         |   |                        |   |                            |   |                |   |                           |   |                                  |   |                                |   |                |   |                           |    |                        |    |                            |    |                          |    |                                                |    |       |
| 502 | section_11_person_4_work<br>Show the field ONLY if:<br>[section_11_team_num] > 3       | Did team member four work in participating ICU during the course of the SCCM ICU Liberation Collaborative? | yesno, Required<br><table border="1"> <tr><td>1</td><td>Yes</td></tr> <tr><td>0</td><td>No</td></tr> </table> Custom alignment: RH                                                                                                                                                                                                                                                                                                                                                                                                                                                                                                                                                                                                                                                                                                      | 1 | Yes                                     | 0 | No                     |   |                            |   |                |   |                           |   |                                  |   |                                |   |                |   |                           |    |                        |    |                            |    |                          |    |                                                |    |       |
| 1   | Yes                                                                                    |                                                                                                            |                                                                                                                                                                                                                                                                                                                                                                                                                                                                                                                                                                                                                                                                                                                                                                                                                                         |   |                                         |   |                        |   |                            |   |                |   |                           |   |                                  |   |                                |   |                |   |                           |    |                        |    |                            |    |                          |    |                                                |    |       |
| 0   | No                                                                                     |                                                                                                            |                                                                                                                                                                                                                                                                                                                                                                                                                                                                                                                                                                                                                                                                                                                                                                                                                                         |   |                                         |   |                        |   |                            |   |                |   |                           |   |                                  |   |                                |   |                |   |                           |    |                        |    |                            |    |                          |    |                                                |    |       |
| 503 | section_11_person_4_exp<br>Show the field ONLY if:<br>[section_11_team_num] > 3        | Team member four current years of professional experience                                                  | text (number, Min: 1, Max: 99), Required<br>Custom alignment: RH                                                                                                                                                                                                                                                                                                                                                                                                                                                                                                                                                                                                                                                                                                                                                                        |   |                                         |   |                        |   |                            |   |                |   |                           |   |                                  |   |                                |   |                |   |                           |    |                        |    |                            |    |                          |    |                                                |    |       |

|            |                                                                                                                                      |                                                                                                                                            |                                                                                                                                                                                                                                                                                                                                                                                                                                                                                                                                                                                                                                                                                                                                                                                                                                                                                                                                                                                                                                                                                                                                                                                                                                                                                                                                                                                                                                                                                                                                                                                                                                                                                                                                                                                                                                                                                                                                                                                                                                                                                                                                                                                                          |   |                                         |                                         |            |                                         |                                                                                                 |   |                                         |                                                                                 |   |                                         |                                      |   |                                         |                                                                         |   |                                         |                                                        |   |                                         |                                                      |   |                                         |                                                                                    |   |                                         |       |
|------------|--------------------------------------------------------------------------------------------------------------------------------------|--------------------------------------------------------------------------------------------------------------------------------------------|----------------------------------------------------------------------------------------------------------------------------------------------------------------------------------------------------------------------------------------------------------------------------------------------------------------------------------------------------------------------------------------------------------------------------------------------------------------------------------------------------------------------------------------------------------------------------------------------------------------------------------------------------------------------------------------------------------------------------------------------------------------------------------------------------------------------------------------------------------------------------------------------------------------------------------------------------------------------------------------------------------------------------------------------------------------------------------------------------------------------------------------------------------------------------------------------------------------------------------------------------------------------------------------------------------------------------------------------------------------------------------------------------------------------------------------------------------------------------------------------------------------------------------------------------------------------------------------------------------------------------------------------------------------------------------------------------------------------------------------------------------------------------------------------------------------------------------------------------------------------------------------------------------------------------------------------------------------------------------------------------------------------------------------------------------------------------------------------------------------------------------------------------------------------------------------------------------|---|-----------------------------------------|-----------------------------------------|------------|-----------------------------------------|-------------------------------------------------------------------------------------------------|---|-----------------------------------------|---------------------------------------------------------------------------------|---|-----------------------------------------|--------------------------------------|---|-----------------------------------------|-------------------------------------------------------------------------|---|-----------------------------------------|--------------------------------------------------------|---|-----------------------------------------|------------------------------------------------------|---|-----------------------------------------|------------------------------------------------------------------------------------|---|-----------------------------------------|-------|
| <p>504</p> | <p>section_11_person_4_responsibilities</p> <p>Show the field ONLY if:<br/>[section_11_team_num] &gt; 3</p>                          | <p>What responsibilities did team member four hold during the course of the SCCM ICU Liberation collaborative? (select all that apply)</p> | <p>checkbox, Required</p> <table border="1"> <tr> <td data-bbox="1036 107 1068 191">1</td> <td data-bbox="1068 107 1430 191">section_11_person_4_responsibilities__1</td> <td data-bbox="1430 107 1570 191">Core ICU Libe team leader (Regional Cha</td> </tr> <tr> <td data-bbox="1036 191 1068 401">2</td> <td data-bbox="1068 191 1430 401">section_11_person_4_responsibilities__2</td> <td data-bbox="1430 191 1570 401">Core ICU Libe team leader (attended a minimum of 1 person ICU Liberation Collaborative meeting)</td> </tr> <tr> <td data-bbox="1036 401 1068 562">3</td> <td data-bbox="1068 401 1430 562">section_11_person_4_responsibilities__3</td> <td data-bbox="1430 401 1570 562">Core ICU Libe team leader (attend any in-ICU Liberation Collaborative meetings)</td> </tr> <tr> <td data-bbox="1036 562 1068 653">4</td> <td data-bbox="1068 562 1430 653">section_11_person_4_responsibilities__4</td> <td data-bbox="1430 562 1570 653">Participating : ABCDEF bund champion</td> </tr> <tr> <td data-bbox="1036 653 1068 789">5</td> <td data-bbox="1068 653 1430 789">section_11_person_4_responsibilities__5</td> <td data-bbox="1430 653 1570 789">Responsible f training/educ other ICU clin on ABCDEF bu at participatir</td> </tr> <tr> <td data-bbox="1036 789 1068 900">6</td> <td data-bbox="1068 789 1430 900">section_11_person_4_responsibilities__6</td> <td data-bbox="1430 789 1570 900">Responsible f Liberation Collaborative collection effc</td> </tr> <tr> <td data-bbox="1036 900 1068 1012">7</td> <td data-bbox="1068 900 1430 1012">section_11_person_4_responsibilities__7</td> <td data-bbox="1430 900 1570 1012">Revising participating : ABCDEF bund related policie</td> </tr> <tr> <td data-bbox="1036 1012 1068 1199">8</td> <td data-bbox="1068 1012 1430 1199">section_11_person_4_responsibilities__8</td> <td data-bbox="1430 1012 1570 1199">Communicati hospital administrator regarding ABC bundle implementati efforts/needs</td> </tr> <tr> <td data-bbox="1036 1199 1068 1241">9</td> <td data-bbox="1068 1199 1430 1241">section_11_person_4_responsibilities__9</td> <td data-bbox="1430 1199 1570 1241">Other</td> </tr> </table> | 1 | section_11_person_4_responsibilities__1 | Core ICU Libe team leader (Regional Cha | 2          | section_11_person_4_responsibilities__2 | Core ICU Libe team leader (attended a minimum of 1 person ICU Liberation Collaborative meeting) | 3 | section_11_person_4_responsibilities__3 | Core ICU Libe team leader (attend any in-ICU Liberation Collaborative meetings) | 4 | section_11_person_4_responsibilities__4 | Participating : ABCDEF bund champion | 5 | section_11_person_4_responsibilities__5 | Responsible f training/educ other ICU clin on ABCDEF bu at participatir | 6 | section_11_person_4_responsibilities__6 | Responsible f Liberation Collaborative collection effc | 7 | section_11_person_4_responsibilities__7 | Revising participating : ABCDEF bund related policie | 8 | section_11_person_4_responsibilities__8 | Communicati hospital administrator regarding ABC bundle implementati efforts/needs | 9 | section_11_person_4_responsibilities__9 | Other |
| 1          | section_11_person_4_responsibilities__1                                                                                              | Core ICU Libe team leader (Regional Cha                                                                                                    |                                                                                                                                                                                                                                                                                                                                                                                                                                                                                                                                                                                                                                                                                                                                                                                                                                                                                                                                                                                                                                                                                                                                                                                                                                                                                                                                                                                                                                                                                                                                                                                                                                                                                                                                                                                                                                                                                                                                                                                                                                                                                                                                                                                                          |   |                                         |                                         |            |                                         |                                                                                                 |   |                                         |                                                                                 |   |                                         |                                      |   |                                         |                                                                         |   |                                         |                                                        |   |                                         |                                                      |   |                                         |                                                                                    |   |                                         |       |
| 2          | section_11_person_4_responsibilities__2                                                                                              | Core ICU Libe team leader (attended a minimum of 1 person ICU Liberation Collaborative meeting)                                            |                                                                                                                                                                                                                                                                                                                                                                                                                                                                                                                                                                                                                                                                                                                                                                                                                                                                                                                                                                                                                                                                                                                                                                                                                                                                                                                                                                                                                                                                                                                                                                                                                                                                                                                                                                                                                                                                                                                                                                                                                                                                                                                                                                                                          |   |                                         |                                         |            |                                         |                                                                                                 |   |                                         |                                                                                 |   |                                         |                                      |   |                                         |                                                                         |   |                                         |                                                        |   |                                         |                                                      |   |                                         |                                                                                    |   |                                         |       |
| 3          | section_11_person_4_responsibilities__3                                                                                              | Core ICU Libe team leader (attend any in-ICU Liberation Collaborative meetings)                                                            |                                                                                                                                                                                                                                                                                                                                                                                                                                                                                                                                                                                                                                                                                                                                                                                                                                                                                                                                                                                                                                                                                                                                                                                                                                                                                                                                                                                                                                                                                                                                                                                                                                                                                                                                                                                                                                                                                                                                                                                                                                                                                                                                                                                                          |   |                                         |                                         |            |                                         |                                                                                                 |   |                                         |                                                                                 |   |                                         |                                      |   |                                         |                                                                         |   |                                         |                                                        |   |                                         |                                                      |   |                                         |                                                                                    |   |                                         |       |
| 4          | section_11_person_4_responsibilities__4                                                                                              | Participating : ABCDEF bund champion                                                                                                       |                                                                                                                                                                                                                                                                                                                                                                                                                                                                                                                                                                                                                                                                                                                                                                                                                                                                                                                                                                                                                                                                                                                                                                                                                                                                                                                                                                                                                                                                                                                                                                                                                                                                                                                                                                                                                                                                                                                                                                                                                                                                                                                                                                                                          |   |                                         |                                         |            |                                         |                                                                                                 |   |                                         |                                                                                 |   |                                         |                                      |   |                                         |                                                                         |   |                                         |                                                        |   |                                         |                                                      |   |                                         |                                                                                    |   |                                         |       |
| 5          | section_11_person_4_responsibilities__5                                                                                              | Responsible f training/educ other ICU clin on ABCDEF bu at participatir                                                                    |                                                                                                                                                                                                                                                                                                                                                                                                                                                                                                                                                                                                                                                                                                                                                                                                                                                                                                                                                                                                                                                                                                                                                                                                                                                                                                                                                                                                                                                                                                                                                                                                                                                                                                                                                                                                                                                                                                                                                                                                                                                                                                                                                                                                          |   |                                         |                                         |            |                                         |                                                                                                 |   |                                         |                                                                                 |   |                                         |                                      |   |                                         |                                                                         |   |                                         |                                                        |   |                                         |                                                      |   |                                         |                                                                                    |   |                                         |       |
| 6          | section_11_person_4_responsibilities__6                                                                                              | Responsible f Liberation Collaborative collection effc                                                                                     |                                                                                                                                                                                                                                                                                                                                                                                                                                                                                                                                                                                                                                                                                                                                                                                                                                                                                                                                                                                                                                                                                                                                                                                                                                                                                                                                                                                                                                                                                                                                                                                                                                                                                                                                                                                                                                                                                                                                                                                                                                                                                                                                                                                                          |   |                                         |                                         |            |                                         |                                                                                                 |   |                                         |                                                                                 |   |                                         |                                      |   |                                         |                                                                         |   |                                         |                                                        |   |                                         |                                                      |   |                                         |                                                                                    |   |                                         |       |
| 7          | section_11_person_4_responsibilities__7                                                                                              | Revising participating : ABCDEF bund related policie                                                                                       |                                                                                                                                                                                                                                                                                                                                                                                                                                                                                                                                                                                                                                                                                                                                                                                                                                                                                                                                                                                                                                                                                                                                                                                                                                                                                                                                                                                                                                                                                                                                                                                                                                                                                                                                                                                                                                                                                                                                                                                                                                                                                                                                                                                                          |   |                                         |                                         |            |                                         |                                                                                                 |   |                                         |                                                                                 |   |                                         |                                      |   |                                         |                                                                         |   |                                         |                                                        |   |                                         |                                                      |   |                                         |                                                                                    |   |                                         |       |
| 8          | section_11_person_4_responsibilities__8                                                                                              | Communicati hospital administrator regarding ABC bundle implementati efforts/needs                                                         |                                                                                                                                                                                                                                                                                                                                                                                                                                                                                                                                                                                                                                                                                                                                                                                                                                                                                                                                                                                                                                                                                                                                                                                                                                                                                                                                                                                                                                                                                                                                                                                                                                                                                                                                                                                                                                                                                                                                                                                                                                                                                                                                                                                                          |   |                                         |                                         |            |                                         |                                                                                                 |   |                                         |                                                                                 |   |                                         |                                      |   |                                         |                                                                         |   |                                         |                                                        |   |                                         |                                                      |   |                                         |                                                                                    |   |                                         |       |
| 9          | section_11_person_4_responsibilities__9                                                                                              | Other                                                                                                                                      |                                                                                                                                                                                                                                                                                                                                                                                                                                                                                                                                                                                                                                                                                                                                                                                                                                                                                                                                                                                                                                                                                                                                                                                                                                                                                                                                                                                                                                                                                                                                                                                                                                                                                                                                                                                                                                                                                                                                                                                                                                                                                                                                                                                                          |   |                                         |                                         |            |                                         |                                                                                                 |   |                                         |                                                                                 |   |                                         |                                      |   |                                         |                                                                         |   |                                         |                                                        |   |                                         |                                                      |   |                                         |                                                                                    |   |                                         |       |
| <p>505</p> | <p>section_11_person_4_other_responsibilities</p> <p>Show the field ONLY if:<br/>[section_11_person_4_responsibilities(9)] = '1'</p> | <p>Please specify other responsibilities:</p>                                                                                              | <p>text, Required</p>                                                                                                                                                                                                                                                                                                                                                                                                                                                                                                                                                                                                                                                                                                                                                                                                                                                                                                                                                                                                                                                                                                                                                                                                                                                                                                                                                                                                                                                                                                                                                                                                                                                                                                                                                                                                                                                                                                                                                                                                                                                                                                                                                                                    |   |                                         |                                         |            |                                         |                                                                                                 |   |                                         |                                                                                 |   |                                         |                                      |   |                                         |                                                                         |   |                                         |                                                        |   |                                         |                                                      |   |                                         |                                                                                    |   |                                         |       |
| <p>506</p> | <p>discovery_icu_survey_complete</p>                                                                                                 | <p>Section Header: <i>Form Status</i><br/>Complete?</p>                                                                                    | <p>dropdown</p> <table border="1"> <tr> <td data-bbox="1036 1423 1068 1465">0</td> <td data-bbox="1068 1423 1179 1465">Incomplete</td> </tr> <tr> <td data-bbox="1036 1465 1068 1507">1</td> <td data-bbox="1068 1465 1179 1507">Unverified</td> </tr> <tr> <td data-bbox="1036 1507 1068 1539">2</td> <td data-bbox="1068 1507 1179 1539">Complete</td> </tr> </table>                                                                                                                                                                                                                                                                                                                                                                                                                                                                                                                                                                                                                                                                                                                                                                                                                                                                                                                                                                                                                                                                                                                                                                                                                                                                                                                                                                                                                                                                                                                                                                                                                                                                                                                                                                                                                                  | 0 | Incomplete                              | 1                                       | Unverified | 2                                       | Complete                                                                                        |   |                                         |                                                                                 |   |                                         |                                      |   |                                         |                                                                         |   |                                         |                                                        |   |                                         |                                                      |   |                                         |                                                                                    |   |                                         |       |
| 0          | Incomplete                                                                                                                           |                                                                                                                                            |                                                                                                                                                                                                                                                                                                                                                                                                                                                                                                                                                                                                                                                                                                                                                                                                                                                                                                                                                                                                                                                                                                                                                                                                                                                                                                                                                                                                                                                                                                                                                                                                                                                                                                                                                                                                                                                                                                                                                                                                                                                                                                                                                                                                          |   |                                         |                                         |            |                                         |                                                                                                 |   |                                         |                                                                                 |   |                                         |                                      |   |                                         |                                                                         |   |                                         |                                                        |   |                                         |                                                      |   |                                         |                                                                                    |   |                                         |       |
| 1          | Unverified                                                                                                                           |                                                                                                                                            |                                                                                                                                                                                                                                                                                                                                                                                                                                                                                                                                                                                                                                                                                                                                                                                                                                                                                                                                                                                                                                                                                                                                                                                                                                                                                                                                                                                                                                                                                                                                                                                                                                                                                                                                                                                                                                                                                                                                                                                                                                                                                                                                                                                                          |   |                                         |                                         |            |                                         |                                                                                                 |   |                                         |                                                                                 |   |                                         |                                      |   |                                         |                                                                         |   |                                         |                                                        |   |                                         |                                                      |   |                                         |                                                                                    |   |                                         |       |
| 2          | Complete                                                                                                                             |                                                                                                                                            |                                                                                                                                                                                                                                                                                                                                                                                                                                                                                                                                                                                                                                                                                                                                                                                                                                                                                                                                                                                                                                                                                                                                                                                                                                                                                                                                                                                                                                                                                                                                                                                                                                                                                                                                                                                                                                                                                                                                                                                                                                                                                                                                                                                                          |   |                                         |                                         |            |                                         |                                                                                                 |   |                                         |                                                                                 |   |                                         |                                      |   |                                         |                                                                         |   |                                         |                                                        |   |                                         |                                                      |   |                                         |                                                                                    |   |                                         |       |
